# Supplementary material for: Comprehensive Analysis of miRNA and mRNA Expression Profiles during Muscle Development of the Longest Dorsal Muscle in Gannan Yaks and Jeryaks
Source: Preprints.org preprint supplement (doi:10.20944/preprints202310.1377.v1), 2023-10-23
Supplement: Supplementary file 1 [file supplementary]

miRNA	target	target_start	target_end	energy(kcal/mol)	target_region(3'->5')	mirna-target_pairing(5'->3')	miRNA_sequence(5'->3')	Symbol	Description	KEGG_A_class	KEGG_B_class	Pathway	K_ID	GO Component	GO Function	GO Process	TF_family
miR-206-y	MSTRG.28873	131	153	-18.65	cCCTTACATAGTATTCGCCCctc	x||||||||xx:x|||:|x|xxx	tGGAATGTAAGG-AAGTGTGtgg	BRD4	PREDICTED: bromodomain-containing protein 4-like [Bos indicus]	-	-	-	-	GO:0000228//nuclear chromosome;GO:0000785//chromatin;GO:0008023//transcription elongation factor complex	GO:0003676//nucleic acid binding;GO:0042393//histone binding;GO:0052689//carboxylic ester hydrolase activity	GO:0000077//DNA damage checkpoint;GO:0001932//regulation of protein phosphorylation;GO:0006357//regulation of transcription from RNA polymerase II promoter;GO:0008283//cell proliferation;GO:0010389//regulation of G2/M transition of mitotic cell cycle;GO:0031347//regulation of defense response;GO:0032786//positive regulation of DNA-templated transcription, elongation;GO:0043122//regulation of I-ka…	--
miR-206-y	MSTRG.9896	1459	1478	-19.14	tCCTTACA--CCGGCGGACcgg	x|||||||xx||xx|:x||xxx	tGGAATGTAAGGAAGTGTGtgg	--	IQ motif and ankyrin repeat domain-containing protein 1 isoform X4 [Cervus canadensis]	-	-	-	-	-	-	-	--
miR-133-x	MSTRG.4090	14749	14769	-14.97	aCGACCATGA-GTCTTGtgccc	x|||||||xxx::||||xxxxx	aGCTGGTAAAATGGAACcaaat	--	PREDICTED: basic salivary proline-rich protein 1-like isoform X2 [Bos indicus]	-	-	-	-	GO:0031224//intrinsic component of membrane;GO:0044421//extracellular region part	GO:0043169//cation binding;GO:0060089//molecular transducer activity	GO:0007162//negative regulation of cell adhesion;GO:0007169//transmembrane receptor protein tyrosine kinase signaling pathway;GO:0007606//sensory perception of chemical stimulus;GO:0010596//negative regulation of endothelial cell migration;GO:0045765//regulation of angiogenesis;GO:0048869//cellular developmental process;GO:0050922//negative regulation of chemotaxis	--
miR-133-x	MSTRG.9421	758	778	-15.27	tCGACCATAA-ACTGTGacttc	x|||||||xxx||:x||xxxxx	aGCTGGTAAAATGGAACcaaat	--	thymocyte nuclear protein 1 isoform X2 [Odocoileus virginianus texanus]	-	-	-	-	-	-	-	--
miR-339-x	MSTRG.1998	1382	1401	-20.1	gGGGACAGT---TCCCCGccgaa	x|||||||xxxx|||x||xxxxx	tCCCTGTCCTCCAGGAGCtcact	DACT2	dapper homolog 2 [Bos indicus x Bos taurus]	-	-	-	-	GO:0043231//intracellular membrane-bounded organelle	GO:0019901//protein kinase binding	GO:0000904//cell morphogenesis involved in differentiation;GO:0007155//cell adhesion;GO:0032926//negative regulation of activin receptor signaling pathway;GO:0072044//collecting duct development	--
miR-339-x	MSTRG.22496	1691	1713	-29.26	aGGGACAGGTAGTGGTTGAGggc	x||||||||xx||xx|:|||xxx	tCCCTGTCCTCCAGGAGCTCact	--	endonuclease-reverse transcriptase [Babesia ovata]	-	-	-	-	GO:0031252//cell leading edge;GO:0070161//anchoring junction	GO:0003779//actin binding;GO:0050839//cell adhesion molecule binding	GO:0010468//regulation of gene expression;GO:0098602//single organism cell adhesion	--
miR-339-x	MSTRG.29222	1535	1557	-20.94	cGGGACAGTGCGTACACGAGgcg	x|||||||x:x||x|x||||xxx	tCCCTGTCCTCCAGGAGCTCact	--	serine/arginine repetitive matrix protein 1-like [Zalophus californianus]	-	-	-	-	GO:0042579//microbody	GO:0005515//protein binding;GO:0016647//oxidoreductase activity, acting on the CH-NH group of donors, oxygen as acceptor	GO:0006596//polyamine biosynthetic process;GO:0006598//polyamine catabolic process;GO:0031328//positive regulation of cellular biosynthetic process;GO:0044710//single-organism metabolic process;GO:0051234//establishment of localization	--
miR-339-x	MSTRG.4090	12473	12495	-26.49	gGGGACAGGAACTACTGGTGggg	x|||||||||xx|x||x|x|xxx	tCCCTGTCCTCCAGGAGCTCact	--	PREDICTED: basic salivary proline-rich protein 1-like isoform X2 [Bos indicus]	-	-	-	-	GO:0031224//intrinsic component of membrane;GO:0044421//extracellular region part	GO:0043169//cation binding;GO:0060089//molecular transducer activity	GO:0007162//negative regulation of cell adhesion;GO:0007169//transmembrane receptor protein tyrosine kinase signaling pathway;GO:0007606//sensory perception of chemical stimulus;GO:0010596//negative regulation of endothelial cell migration;GO:0045765//regulation of angiogenesis;GO:0048869//cellular developmental process;GO:0050922//negative regulation of chemotaxis	--
miR-339-x	MSTRG.4101	217	239	-28.41	aGGGACAGGGTCCCCTCTAGggc	x||||||||:xxx||||x||xxx	tCCCTGTCCTCCAGGAGCTCact	--	-	-	-	-	-	-	-	-	--
miR-339-x	MSTRG.6690	947	973	-31.5	cGGGACAGAATAGAGGTCGTGGAGgag	x|||||||xxxx||||||x|x|||xxx	tCCCTGTC----CTCCAGGAGCTCact	--	uncharacterized protein LOC113906999 [Bos indicus x Bos taurus]	-	-	-	-	-	-	-	--
miR-423-y	MSTRG.21179	473	501	-33.26	cCGAGCCACGGGCCGAGACCGGGGAGcgg	x|||||||xxxxxx||xx||||||||xxx	aGCTCGGT------CTGAGGCCCCTCagt	--	LOW QUALITY PROTEIN: collagen alpha-1(IV) chain-like [Phocoena sinus]	-	-	-	-	-	-	-	--
miR-423-y	MSTRG.31466	12	35	-28.79	cCGAGCCACGAGTCCGGCGTGaag	x|||||||x||x|||||x|x|xxx	aGCTCGGT-CTGAGGCCCCTCagt	LONRF2	LOW QUALITY PROTEIN: LON peptidase N-terminal domain and RING finger protein 2 [Bos taurus]	-	-	-	-	-	GO:0046914//transition metal ion binding	GO:0019538//protein metabolic process	--
miR-423-y	MSTRG.4090	5778	5798	-20.19	aCGAGCCA--CTACGatgccaca	x|||||||xx||x||xxxxxxxx	aGCTCGGTCTGAGGCccctcagt	--	PREDICTED: basic salivary proline-rich protein 1-like isoform X2 [Bos indicus]	-	-	-	-	GO:0031224//intrinsic component of membrane;GO:0044421//extracellular region part	GO:0043169//cation binding;GO:0060089//molecular transducer activity	GO:0007162//negative regulation of cell adhesion;GO:0007169//transmembrane receptor protein tyrosine kinase signaling pathway;GO:0007606//sensory perception of chemical stimulus;GO:0010596//negative regulation of endothelial cell migration;GO:0045765//regulation of angiogenesis;GO:0048869//cellular developmental process;GO:0050922//negative regulation of chemotaxis	--
miR-381-y	MSTRG.15958	2407	2429	-13.18	tTATGTTCTGGTCTCtgcttcgg	x|||||||:x||x||xxxxxxxx	tATACAAGGGCA-AGctctctgt	--	-	-	-	-	-	-	-	-	--
miR-450-x	MSTRG.21507	2288	2308	-10.86	aAAACGTTTGACATTTACgtc	x|||||||xx|||xxx||xxx	tTTTGCAATATGTTCCTGaat	Slc29a2	equilibrative nucleoside transporter 2 isoform X2 [Bos taurus]	Human Diseases	Substance dependence	ko05034//Alcoholism	K15014	GO:0016021//integral component of membrane;GO:0031090//organelle membrane;GO:0043231//intracellular membrane-bounded organelle;GO:0043232//intracellular non-membrane-bounded organelle	GO:0015932//nucleobase-containing compound transmembrane transporter activity	GO:0006725//cellular aromatic compound metabolic process;GO:0006863//purine nucleobase transport;GO:0007589//body fluid secretion;GO:0015855//pyrimidine nucleobase transport;GO:0015864//pyrimidine nucleoside transport;GO:0032868//response to insulin;GO:0044763//single-organism cellular process	--
miR-450-x	MSTRG.27704	1736	1755	-10.2	tAAACGTTG-ACAActgaaag	x|||||||:x||||xxxxxxx	tTTTGCAATATGTTcctgaat	pol	PREDICTED: endogenous retrovirus group K member 19 Env polyprotein-like [Bison bison bison]	-	-	-	-	GO:0019012//virion;GO:0030131//clathrin adaptor complex;GO:0030135//coated vesicle;GO:0036464//cytoplasmic ribonucleoprotein granule	GO:0000175//3'-5'-exoribonuclease activity;GO:0008289//lipid binding;GO:0015631//tubulin binding;GO:0016740//transferase activity;GO:0043167//ion binding;GO:0044822//poly(A) RNA binding	GO:0001649//osteoblast differentiation;GO:0002237//response to molecule of bacterial origin;GO:0006259//DNA metabolic process;GO:0007009//plasma membrane organization;GO:0007623//circadian rhythm;GO:0022618//ribonucleoprotein complex assembly;GO:0043488//regulation of mRNA stability;GO:0045597//positive regulation of cell differentiation;GO:0045807//positive regulation of endocytosis;GO:0090501//…	--
miR-4334-y	MSTRG.1998	1384	1401	-18.97	gGGGACAGT---TCCCCGccg	x|||||||xxxx|||x||xxx	tCCCTGTCCTCCAGGAGCtct	DACT2	dapper homolog 2 [Bos indicus x Bos taurus]	-	-	-	-	GO:0043231//intracellular membrane-bounded organelle	GO:0019901//protein kinase binding	GO:0000904//cell morphogenesis involved in differentiation;GO:0007155//cell adhesion;GO:0032926//negative regulation of activin receptor signaling pathway;GO:0072044//collecting duct development	--
miR-4334-y	MSTRG.22496	1693	1713	-28.84	aGGGACAGGTAGTGGTTGAgg	x||||||||xx||xx|:||xx	tCCCTGTCCTCCAGGAGCTct	--	endonuclease-reverse transcriptase [Babesia ovata]	-	-	-	-	GO:0031252//cell leading edge;GO:0070161//anchoring junction	GO:0003779//actin binding;GO:0050839//cell adhesion molecule binding	GO:0010468//regulation of gene expression;GO:0098602//single organism cell adhesion	--
miR-4334-y	MSTRG.29222	1537	1557	-20.52	cGGGACAGTGCGTACACGAgg	x|||||||x:x||x|x|||xx	tCCCTGTCCTCCAGGAGCTct	--	serine/arginine repetitive matrix protein 1-like [Zalophus californianus]	-	-	-	-	GO:0042579//microbody	GO:0005515//protein binding;GO:0016647//oxidoreductase activity, acting on the CH-NH group of donors, oxygen as acceptor	GO:0006596//polyamine biosynthetic process;GO:0006598//polyamine catabolic process;GO:0031328//positive regulation of cellular biosynthetic process;GO:0044710//single-organism metabolic process;GO:0051234//establishment of localization	--
miR-4334-y	MSTRG.4090	12475	12495	-23.34	gGGGACAGGAACTACTGGtgg	x|||||||||xx|x||x|xxx	tCCCTGTCCTCCAGGAGCtct	--	PREDICTED: basic salivary proline-rich protein 1-like isoform X2 [Bos indicus]	-	-	-	-	GO:0031224//intrinsic component of membrane;GO:0044421//extracellular region part	GO:0043169//cation binding;GO:0060089//molecular transducer activity	GO:0007162//negative regulation of cell adhesion;GO:0007169//transmembrane receptor protein tyrosine kinase signaling pathway;GO:0007606//sensory perception of chemical stimulus;GO:0010596//negative regulation of endothelial cell migration;GO:0045765//regulation of angiogenesis;GO:0048869//cellular developmental process;GO:0050922//negative regulation of chemotaxis	--
miR-4334-y	MSTRG.4101	219	239	-27.99	aGGGACAGGGTCCCCTCTAgg	x||||||||:xxx||||x|xx	tCCCTGTCCTCCAGGAGCTct	--	-	-	-	-	-	-	-	-	--
miR-4334-y	MSTRG.6690	949	973	-30.2	cGGGACAGAATAGAGGTCGTGGAgg	x|||||||xxxx||||||x|x||xx	tCCCTGTC----CTCCAGGAGCTct	--	uncharacterized protein LOC113906999 [Bos indicus x Bos taurus]	-	-	-	-	-	-	-	--
miR-3968-z	MSTRG.14602	484	501	-21.67	gAGGGTGAGGAgggccct	x||||||||||xxxxxxx	aTCCCACTCCTgacacca	ZNF671	zinc finger protein 28 homolog [Zalophus californianus]	Human Diseases	Infectious disease: viral	ko05168//Herpes simplex virus 1 infection	K09228	-	-	-	--
miR-3968-z	MSTRG.15288	306	326	-17.99	aAGGGTGAGAAGGACTCTttt	x||||||||xxx||||x|xxx	aTCCCACTC---CTGACAcca	ZFP30	LOW QUALITY PROTEIN: zinc finger protein 30 [Ovis aries]	Human Diseases	Infectious disease: viral	ko05168//Herpes simplex virus 1 infection	K09228	-	-	-	--
miR-3968-z	MSTRG.21179	492	509	-11.3	gAGGGTGAccgagccacg	x|||||||xxxxxxxxxx	aTCCCACTcctgacacca	--	LOW QUALITY PROTEIN: collagen alpha-1(IV) chain-like [Phocoena sinus]	-	-	-	-	-	-	-	--
miR-3968-z	MSTRG.25549	232	248	-13.48	gAGGGTGACG-CGGTaaa	x|||||||x|x|x||xxx	aTCCCACTCCTGACAcca	STAT2	signal transducer and activator of transcription 2 isoform 1 [Camelus ferus]	Human Diseases;Human Diseases;Human Diseases;Human Diseases;Human Diseases;Organismal Systems;Environmental Information Processing;Human Diseases;Organismal Systems;Human Diseases;Cellular Processes;Human Diseases;Human Diseases;Organismal Systems;Organismal Systems	Infectious disease: viral;Cancer: overview;Infectious disease: viral;Infectious disease: viral;Infectious disease: viral;Immune system;Signal transduction;Infectious disease: viral;Immune system;Infectious disease: viral;Cell growth and death;Infectious disease: viral;Infectious disease: viral;Development and regeneration;Immune system	ko05168//Herpes simplex virus 1 infection;ko05200//Pathways in cancer;ko05165//Human papillomavirus infection;ko05169//Epstein-Barr virus infection;ko05162//Measles;ko04062//Chemokine signaling pathway;ko04630//JAK-STAT signaling pathway;ko05167//Kaposi sarcoma-associated herpesvirus infection;ko04621//NOD-like receptor signaling pathway;ko05164//Influenza A;ko04217//Necroptosis;ko05161//Hepatiti…	K11221;K11221;K11221;K11221;K11221;K11221;K11221;K11221;K11221;K11221;K11221;K11221;K11221;K11221;K11221	GO:0016020//membrane;GO:0031981//nuclear lumen;GO:0044444//cytoplasmic part	GO:0001071//nucleic acid binding transcription factor activity;GO:0003677//DNA binding;GO:0005515//protein binding;GO:0060089//molecular transducer activity	GO:0001959//regulation of cytokine-mediated signaling pathway;GO:0002252//immune effector process;GO:0006355//regulation of transcription, DNA-templated;GO:0006366//transcription from RNA polymerase II promoter;GO:0009617//response to bacterium;GO:0010506//regulation of autophagy;GO:0035556//intracellular signal transduction;GO:0044403//symbiosis, encompassing mutualism through parasitism;GO:0044…	--
miR-3968-z	MSTRG.29222	585	602	-24.9	aAGGGTGAGGGCcccggt	x|||||||||:|xxxxxx	aTCCCACTCCTGacacca	--	serine/arginine repetitive matrix protein 1-like [Zalophus californianus]	-	-	-	-	GO:0042579//microbody	GO:0005515//protein binding;GO:0016647//oxidoreductase activity, acting on the CH-NH group of donors, oxygen as acceptor	GO:0006596//polyamine biosynthetic process;GO:0006598//polyamine catabolic process;GO:0031328//positive regulation of cellular biosynthetic process;GO:0044710//single-organism metabolic process;GO:0051234//establishment of localization	--
miR-3968-z	MSTRG.31308	373	390	-11.19	cAGGGTGAaatccttaac	x|||||||xxxxxxxxxx	aTCCCACTcctgacacca	--	hornerin-like, partial [Bos taurus]	-	-	-	-	-	-	-	--
miR-3968-z	MSTRG.4090	4924	4941	-22.78	gAGGGTGAGAAGGGTGgt	x||||||||x|xx|||xx	aTCCCACTCCTGACACca	--	PREDICTED: basic salivary proline-rich protein 1-like isoform X2 [Bos indicus]	-	-	-	-	GO:0031224//intrinsic component of membrane;GO:0044421//extracellular region part	GO:0043169//cation binding;GO:0060089//molecular transducer activity	GO:0007162//negative regulation of cell adhesion;GO:0007169//transmembrane receptor protein tyrosine kinase signaling pathway;GO:0007606//sensory perception of chemical stimulus;GO:0010596//negative regulation of endothelial cell migration;GO:0045765//regulation of angiogenesis;GO:0048869//cellular developmental process;GO:0050922//negative regulation of chemotaxis	--
miR-3968-z	MSTRG.5364	235	253	-20.68	tAGGGTGATGACTAGTcgt	x|||||||x||||x||xxx	aTCCCACTCCTGA-CAcca	--	type I cytoskeletal 19-like protein [Labeo rohita]	Metabolism;Metabolism	Global and overview maps;Carbohydrate metabolism	ko01100//Metabolic pathways;ko00650//Butanoate metabolism	K00109;K00109	-	-	-	--
miR-2478-z	MSTRG.14602	484	501	-21.67	gAGGGTGAGGAgggccct	x||||||||||xxxxxxx	aTCCCACTCCTgacacca	ZNF671	zinc finger protein 28 homolog [Zalophus californianus]	Human Diseases	Infectious disease: viral	ko05168//Herpes simplex virus 1 infection	K09228	-	-	-	--
miR-2478-z	MSTRG.15288	306	326	-17.99	aAGGGTGAGAAGGACTCTttt	x||||||||xxx||||x|xxx	aTCCCACTC---CTGACAcca	ZFP30	LOW QUALITY PROTEIN: zinc finger protein 30 [Ovis aries]	Human Diseases	Infectious disease: viral	ko05168//Herpes simplex virus 1 infection	K09228	-	-	-	--
miR-2478-z	MSTRG.21179	492	509	-11.3	gAGGGTGAccgagccacg	x|||||||xxxxxxxxxx	aTCCCACTcctgacacca	--	LOW QUALITY PROTEIN: collagen alpha-1(IV) chain-like [Phocoena sinus]	-	-	-	-	-	-	-	--
miR-2478-z	MSTRG.25549	232	248	-13.48	gAGGGTGACG-CGGTaaa	x|||||||x|x|x||xxx	aTCCCACTCCTGACAcca	STAT2	signal transducer and activator of transcription 2 isoform 1 [Camelus ferus]	Human Diseases;Human Diseases;Human Diseases;Human Diseases;Human Diseases;Organismal Systems;Environmental Information Processing;Human Diseases;Organismal Systems;Human Diseases;Cellular Processes;Human Diseases;Human Diseases;Organismal Systems;Organismal Systems	Infectious disease: viral;Cancer: overview;Infectious disease: viral;Infectious disease: viral;Infectious disease: viral;Immune system;Signal transduction;Infectious disease: viral;Immune system;Infectious disease: viral;Cell growth and death;Infectious disease: viral;Infectious disease: viral;Development and regeneration;Immune system	ko05168//Herpes simplex virus 1 infection;ko05200//Pathways in cancer;ko05165//Human papillomavirus infection;ko05169//Epstein-Barr virus infection;ko05162//Measles;ko04062//Chemokine signaling pathway;ko04630//JAK-STAT signaling pathway;ko05167//Kaposi sarcoma-associated herpesvirus infection;ko04621//NOD-like receptor signaling pathway;ko05164//Influenza A;ko04217//Necroptosis;ko05161//Hepatiti…	K11221;K11221;K11221;K11221;K11221;K11221;K11221;K11221;K11221;K11221;K11221;K11221;K11221;K11221;K11221	GO:0016020//membrane;GO:0031981//nuclear lumen;GO:0044444//cytoplasmic part	GO:0001071//nucleic acid binding transcription factor activity;GO:0003677//DNA binding;GO:0005515//protein binding;GO:0060089//molecular transducer activity	GO:0001959//regulation of cytokine-mediated signaling pathway;GO:0002252//immune effector process;GO:0006355//regulation of transcription, DNA-templated;GO:0006366//transcription from RNA polymerase II promoter;GO:0009617//response to bacterium;GO:0010506//regulation of autophagy;GO:0035556//intracellular signal transduction;GO:0044403//symbiosis, encompassing mutualism through parasitism;GO:0044…	--
miR-2478-z	MSTRG.29222	585	602	-24.9	aAGGGTGAGGGCcccggt	x|||||||||:|xxxxxx	aTCCCACTCCTGacacca	--	serine/arginine repetitive matrix protein 1-like [Zalophus californianus]	-	-	-	-	GO:0042579//microbody	GO:0005515//protein binding;GO:0016647//oxidoreductase activity, acting on the CH-NH group of donors, oxygen as acceptor	GO:0006596//polyamine biosynthetic process;GO:0006598//polyamine catabolic process;GO:0031328//positive regulation of cellular biosynthetic process;GO:0044710//single-organism metabolic process;GO:0051234//establishment of localization	--
miR-2478-z	MSTRG.31308	373	390	-11.19	cAGGGTGAaatccttaac	x|||||||xxxxxxxxxx	aTCCCACTcctgacacca	--	hornerin-like, partial [Bos taurus]	-	-	-	-	-	-	-	--
miR-2478-z	MSTRG.4090	4924	4941	-22.78	gAGGGTGAGAAGGGTGgt	x||||||||x|xx|||xx	aTCCCACTCCTGACACca	--	PREDICTED: basic salivary proline-rich protein 1-like isoform X2 [Bos indicus]	-	-	-	-	GO:0031224//intrinsic component of membrane;GO:0044421//extracellular region part	GO:0043169//cation binding;GO:0060089//molecular transducer activity	GO:0007162//negative regulation of cell adhesion;GO:0007169//transmembrane receptor protein tyrosine kinase signaling pathway;GO:0007606//sensory perception of chemical stimulus;GO:0010596//negative regulation of endothelial cell migration;GO:0045765//regulation of angiogenesis;GO:0048869//cellular developmental process;GO:0050922//negative regulation of chemotaxis	--
miR-2478-z	MSTRG.5364	235	253	-20.68	tAGGGTGATGACTAGTcgt	x|||||||x||||x||xxx	aTCCCACTCCTGA-CAcca	--	type I cytoskeletal 19-like protein [Labeo rohita]	Metabolism;Metabolism	Global and overview maps;Carbohydrate metabolism	ko01100//Metabolic pathways;ko00650//Butanoate metabolism	K00109;K00109	-	-	-	--
miR-206-z	MSTRG.28873	131	153	-15.39	cCCTTACATAGTATTCGCCCctc	x||||||||xx:x|||:|x|xxx	tGGAATGTAAGG-AAGTGTGtga	BRD4	PREDICTED: bromodomain-containing protein 4-like [Bos indicus]	-	-	-	-	GO:0000228//nuclear chromosome;GO:0000785//chromatin;GO:0008023//transcription elongation factor complex	GO:0003676//nucleic acid binding;GO:0042393//histone binding;GO:0052689//carboxylic ester hydrolase activity	GO:0000077//DNA damage checkpoint;GO:0001932//regulation of protein phosphorylation;GO:0006357//regulation of transcription from RNA polymerase II promoter;GO:0008283//cell proliferation;GO:0010389//regulation of G2/M transition of mitotic cell cycle;GO:0031347//regulation of defense response;GO:0032786//positive regulation of DNA-templated transcription, elongation;GO:0043122//regulation of I-ka…	--
miR-206-z	MSTRG.9896	1459	1478	-15.57	tCCTTACA--CCGGCGGACcgg	x|||||||xx||xx|:x||xxx	tGGAATGTAAGGAAGTGTGtga	--	IQ motif and ankyrin repeat domain-containing protein 1 isoform X4 [Cervus canadensis]	-	-	-	-	-	-	-	--
miR-1343-y	MSTRG.15630	281	304	-26.46	aAGGACCCCACGCTCCCTGAGGcg	x||||||||xx||xxxx||||:xx	cTCCTGGGGCCCGC---ACTCTcg	--	protein N-lysine methyltransferase METTL21A isoform X3 [Ovis aries]	-	-	-	-	GO:0031224//intrinsic component of membrane;GO:0044421//extracellular region part	GO:0043169//cation binding;GO:0060089//molecular transducer activity	GO:0007162//negative regulation of cell adhesion;GO:0007169//transmembrane receptor protein tyrosine kinase signaling pathway;GO:0007606//sensory perception of chemical stimulus;GO:0010596//negative regulation of endothelial cell migration;GO:0045765//regulation of angiogenesis;GO:0048869//cellular developmental process;GO:0050922//negative regulation of chemotaxis	--
miR-1343-y	MSTRG.15669	23	44	-19.78	cAGGACCCTCGCTCGTCCGAca	x|||||||x||xx|||xx||xx	cTCCTGGG-GCCCGCACTCTcg	--	-	-	-	-	-	-	-	-	--
miR-1343-y	MSTRG.18801	1029	1047	-20.45	aAGGACCCAAG-TGT-AGAtt	x|||||||xx|x:||x|||xx	cTCCTGGGGCCCGCACTCTcg	MKI67	PREDICTED: antigen KI-67 [Bos mutus]	-	-	-	-	GO:0005694//chromosome;GO:0043231//intracellular membrane-bounded organelle	GO:0003723//RNA binding;GO:0005515//protein binding;GO:0036094//small molecule binding	GO:0000280//nuclear division;GO:0009408//response to heat;GO:0010033//response to organic substance;GO:0031099//regeneration;GO:0044260//cellular macromolecule metabolic process;GO:0044763//single-organism cellular process;GO:1903510//mucopolysaccharide metabolic process	--
miR-1343-y	MSTRG.1997	6	25	-25.27	gAGGACCC-GCGCccccggcg	x|||||||x|x||xxxxxxxx	cTCCTGGGGCCCGcactctcg	DACT2	dapper homolog 2 [Bos indicus x Bos taurus]	-	-	-	-	GO:0043231//intracellular membrane-bounded organelle	GO:0019901//protein kinase binding	GO:0000904//cell morphogenesis involved in differentiation;GO:0007155//cell adhesion;GO:0030097//hemopoiesis;GO:0032926//negative regulation of activin receptor signaling pathway;GO:0072044//collecting duct development	--
miR-1343-y	MSTRG.1998	1537	1559	-17.23	tAGGACCCGAGCCCCGTGtcccg	x|||||||xx|x|xx|||xxxxx	cTCCTGGGGCCCG--CACtctcg	DACT2	dapper homolog 2 [Bos indicus x Bos taurus]	-	-	-	-	GO:0043231//intracellular membrane-bounded organelle	GO:0019901//protein kinase binding	GO:0000904//cell morphogenesis involved in differentiation;GO:0007155//cell adhesion;GO:0032926//negative regulation of activin receptor signaling pathway;GO:0072044//collecting duct development	--
miR-1343-y	MSTRG.21179	705	726	-16.27	cAGGACCCTCCGACCTGccagg	x|||||||x|x|x|x||xxxxx	cTCCTGGG-GCCCGCACtctcg	--	LOW QUALITY PROTEIN: collagen alpha-1(IV) chain-like [Phocoena sinus]	-	-	-	-	-	-	-	--
miR-1343-y	MSTRG.29222	2554	2574	-22.74	aAGGACCCGAGGGGTttggta	x|||||||xx||x||xxxxxx	cTCCTGGGGCCCGCActctcg	--	serine/arginine repetitive matrix protein 1-like [Zalophus californianus]	-	-	-	-	GO:0042579//microbody	GO:0005515//protein binding;GO:0016647//oxidoreductase activity, acting on the CH-NH group of donors, oxygen as acceptor	GO:0006596//polyamine biosynthetic process;GO:0006598//polyamine catabolic process;GO:0031328//positive regulation of cellular biosynthetic process;GO:0044710//single-organism metabolic process;GO:0051234//establishment of localization	--
miR-1343-y	MSTRG.32506	167	187	-14.89	aAGGACCCTcccatgtctcgg	x|||||||:xxxxxxxxxxxx	cTCCTGGGGcccgcactctcg	--	probable inactive serine/threonine-protein kinase slob2 isoform X1 [Vicugna pacos]	-	-	-	-	-	-	-	--
miR-1343-y	MSTRG.33557	964	984	-20.69	gAGGACCCTCTTCGcttctac	x|||||||:xxx||xxxxxxx	cTCCTGGGGCCCGCactctcg	ARHGAP6	rho GTPase-activating protein 6 isoform X2 [Bos indicus x Bos taurus]	-	-	-	-	GO:0015629//actin cytoskeleton;GO:0044444//cytoplasmic part	GO:0019899//enzyme binding;GO:0019904//protein domain specific binding;GO:0030674//protein binding, bridging;GO:0060229//lipase activator activity	GO:0001953//negative regulation of cell-matrix adhesion;GO:0007045//cell-substrate adherens junction assembly;GO:0008154//actin polymerization or depolymerization;GO:0010863//positive regulation of phospholipase C activity;GO:0032232//negative regulation of actin filament bundle assembly;GO:0043087//regulation of GTPase activity	--
miR-1343-y	MSTRG.3691	371	391	-27.65	gAGGACCCTGACTGTGGCAcc	x|||||||:|xx:|||:x|xx	cTCCTGGGGCCCGCACTCTcg	MRC1	PREDICTED: macrophage mannose receptor 1 [Bos mutus]	Human Diseases;Cellular Processes	Infectious disease: bacterial;Transport and catabolism	ko05152//Tuberculosis;ko04145//Phagosome	K06560;K06560	GO:0016021//integral component of membrane;GO:0031090//organelle membrane;GO:0044464//cell part	GO:0038023//signaling receptor activity;GO:0048029//monosaccharide binding	GO:0006897//endocytosis;GO:0032496//response to lipopolysaccharide;GO:0034341//response to interferon-gamma;GO:0050794//regulation of cellular process;GO:0070670//response to interleukin-4	--
miR-1343-y	MSTRG.4090	18336	18358	-27.03	aAGGACCCCGACGTCCTGAGtcc	x|||||||||xx|x|x||||xxx	cTCCTGGGGC--CCGCACTCtcg	--	PREDICTED: basic salivary proline-rich protein 1-like isoform X2 [Bos indicus]	-	-	-	-	GO:0031224//intrinsic component of membrane;GO:0044421//extracellular region part	GO:0043169//cation binding;GO:0060089//molecular transducer activity	GO:0007162//negative regulation of cell adhesion;GO:0007169//transmembrane receptor protein tyrosine kinase signaling pathway;GO:0007606//sensory perception of chemical stimulus;GO:0010596//negative regulation of endothelial cell migration;GO:0045765//regulation of angiogenesis;GO:0048869//cellular developmental process;GO:0050922//negative regulation of chemotaxis	--
miR-1343-y	MSTRG.5784	95	115	-15.49	aAGGACCCAGtttacgtaaca	x|||||||x|xxxxxxxxxxx	cTCCTGGGGCccgcactctcg	SETMAR	mariner transposase [Homo sapiens]	Metabolism;Metabolism	Global and overview maps;Amino acid metabolism	ko01100//Metabolic pathways;ko00310//Lysine degradation	K11433;K11433	GO:0005634//nucleus;GO:0030139//endocytic vesicle;GO:0031224//intrinsic component of membrane;GO:0042995//cell projection;GO:0044427//chromosomal part	GO:0004520//endodeoxyribonuclease activity;GO:0018024//histone-lysine N-methyltransferase activity;GO:0019899//enzyme binding;GO:0043566//structure-specific DNA binding;GO:0046983//protein dimerization activity	GO:0006282//regulation of DNA repair;GO:0006303//double-strand break repair via nonhomologous end joining;GO:0006308//DNA catabolic process;GO:0007041//lysosomal transport;GO:0007093//mitotic cell cycle checkpoint;GO:0010452//histone H3-K36 methylation;GO:0010912//positive regulation of isomerase activity;GO:0010948//negative regulation of cell cycle process;GO:0016050//vesicle organization;GO:00…	--
miR-1343-y	MSTRG.6530	4	24	-21.07	cAGGACCCCGtcgccggtatc	x|||||||||xxxxxxxxxxx	cTCCTGGGGCccgcactctcg	--	-	-	-	-	-	-	-	-	--
miR-1343-y	MSTRG.9421	151	172	-16	tAGGACCCGCAGGatactcatg	x|||||||x|x||xxxxxxxxx	cTCCTGGG-GCCCgcactctcg	--	thymocyte nuclear protein 1 isoform X2 [Odocoileus virginianus texanus]	-	-	-	-	-	-	-	--
miR-196-x	MSTRG.15958	4842	4863	-15.02	tTCCATCAAGTTTCAAGAAatg	x||||||||:x|x|||x||xxx	tAGGTAGTTTCATGTTGTTggg	--	-	-	-	-	-	-	-	-	--
miR-196-x	MSTRG.17500	1158	1179	-16.39	gTCCATCAAcatctcctgtccg	x||||||||xxxxxxxxxxxxx	tAGGTAGTTtcatgttgttggg	C4B	complement C4 isoform X1 [Bos taurus]	Human Diseases;Human Diseases;Organismal Systems;Human Diseases	Immune disease;Infectious disease: bacterial;Immune system;Infectious disease: bacterial	ko05322//Systemic lupus erythematosus;ko05150//Staphylococcus aureus infection;ko04610//Complement and coagulation cascades;ko05133//Pertussis	K03989;K03989;K03989;K03989	GO:0016020//membrane;GO:0031988//membrane-bounded vesicle;GO:0044217//other organism part	GO:0001846//opsonin binding;GO:0061135//endopeptidase regulator activity	GO:0002237//response to molecule of bacterial origin;GO:0002673//regulation of acute inflammatory response;GO:0006956//complement activation;GO:0010466//negative regulation of peptidase activity;GO:0019724//B cell mediated immunity;GO:0043277//apoptotic cell clearance	--
miR-196-x	MSTRG.6892	990	1010	-10.62	cTCCATCACATTG-AACAtata	x|||||||x|x|:x||||xxxx	tAGGTAGTTTCATGTTGTtggg	ABCC4	multidrug resistance-associated protein 4 [Bos taurus]	Environmental Information Processing;Organismal Systems;Environmental Information Processing;Human Diseases	Signal transduction;Digestive system;Membrane transport;Drug resistance: antineoplastic	ko04024//cAMP signaling pathway;ko04976//Bile secretion;ko02010//ABC transporters;ko01523//Antifolate resistance	K05673;K05673;K05673;K05673	GO:0030667//secretory granule membrane;GO:0031224//intrinsic component of membrane	GO:0015405//P-P-bond-hydrolysis-driven transmembrane transporter activity;GO:0016616//oxidoreductase activity, acting on the CH-OH group of donors, NAD or NADP as acceptor;GO:0017111//nucleoside-triphosphatase activity;GO:0032550//purine ribonucleoside binding	GO:0001775//cell activation;GO:0006821//chloride transport;GO:0007599//hemostasis;GO:0008284//positive regulation of cell proliferation;GO:0009719//response to endogenous stimulus;GO:0010033//response to organic substance;GO:0044710//single-organism metabolic process	--
miR-1307-y	MSTRG.14602	180	204	-32.41	aGAGCCGCGTCCGACCGTTTGCGct	x|||||||:x|||x|x|::x||:xx	aCTCGGCGT-GGC-GTCGGTCGTgg	ZNF671	zinc finger protein 28 homolog [Zalophus californianus]	Human Diseases	Infectious disease: viral	ko05168//Herpes simplex virus 1 infection	K09228	-	-	-	--
miR-1307-y	MSTRG.1998	1074	1103	-32.97	tGAGCCGCAGGGGCTTCGCCGACCACCAca	x||||||||xxxxxx:|||x|x|||x||xx	aCTCGGCGT------GGCGTC-GGTCGTgg	DACT2	dapper homolog 2 [Bos indicus x Bos taurus]	-	-	-	-	GO:0043231//intracellular membrane-bounded organelle	GO:0019901//protein kinase binding	GO:0000904//cell morphogenesis involved in differentiation;GO:0007155//cell adhesion;GO:0032926//negative regulation of activin receptor signaling pathway;GO:0072044//collecting duct development	--
miR-1307-y	MSTRG.33557	457	479	-27.88	aGAGCCGC-CCGACAcggactccc	x|||||||x|||x||xxxxxxxxx	aCTCGGCGTGGC-GTcggtcgtgg	ARHGAP6	rho GTPase-activating protein 6 isoform X2 [Bos indicus x Bos taurus]	-	-	-	-	GO:0015629//actin cytoskeleton;GO:0044444//cytoplasmic part	GO:0019899//enzyme binding;GO:0019904//protein domain specific binding;GO:0030674//protein binding, bridging;GO:0060229//lipase activator activity	GO:0001953//negative regulation of cell-matrix adhesion;GO:0007045//cell-substrate adherens junction assembly;GO:0008154//actin polymerization or depolymerization;GO:0010863//positive regulation of phospholipase C activity;GO:0032232//negative regulation of actin filament bundle assembly;GO:0043087//regulation of GTPase activity	--
miR-1307-y	MSTRG.4090	4103	4125	-21.58	aGAGCCGCGGGGAAGgactctcg	x|||||||:xx|x||xxxxxxxx	aCTCGGCGTGGCGTCggtcgtgg	--	PREDICTED: basic salivary proline-rich protein 1-like isoform X2 [Bos indicus]	-	-	-	-	GO:0031224//intrinsic component of membrane;GO:0044421//extracellular region part	GO:0043169//cation binding;GO:0060089//molecular transducer activity	GO:0007162//negative regulation of cell adhesion;GO:0007169//transmembrane receptor protein tyrosine kinase signaling pathway;GO:0007606//sensory perception of chemical stimulus;GO:0010596//negative regulation of endothelial cell migration;GO:0045765//regulation of angiogenesis;GO:0048869//cellular developmental process;GO:0050922//negative regulation of chemotaxis	--
miR-769-z	MSTRG.14602	575	596	-22.82	aCTCTGGACCTTTGACGTTCag	x|||||||xx::::|x::||xx	tGAGACCTCCGGGTTCTGAGct	ZNF671	zinc finger protein 28 homolog [Zalophus californianus]	Human Diseases	Infectious disease: viral	ko05168//Herpes simplex virus 1 infection	K09228	-	-	-	--
miR-769-z	MSTRG.29222	4289	4311	-28.82	tCTCTGGAGGGCCTCCTACTCtc	x|||||||||x||:xxx||||xx	tGAGACCTCC-GGGTTCTGAGct	--	serine/arginine repetitive matrix protein 1-like [Zalophus californianus]	-	-	-	-	GO:0042579//microbody	GO:0005515//protein binding;GO:0016647//oxidoreductase activity, acting on the CH-NH group of donors, oxygen as acceptor	GO:0006596//polyamine biosynthetic process;GO:0006598//polyamine catabolic process;GO:0031328//positive regulation of cellular biosynthetic process;GO:0044710//single-organism metabolic process;GO:0051234//establishment of localization	--
miR-769-z	MSTRG.32506	345	364	-19.47	cCTCTGGA--CTCGGGAGTaag	x|||||||xx|:|::||x|xxx	tGAGACCTCCGGGTTCTGAgct	--	probable inactive serine/threonine-protein kinase slob2 isoform X1 [Vicugna pacos]	-	-	-	-	-	-	-	--
miR-769-z	MSTRG.4090	13722	13743	-25.83	tCTCTGGATGTCCGGGAgcact	x|||||||x|:||::||xxxxx	tGAGACCTCCGGGTTCTgagct	--	PREDICTED: basic salivary proline-rich protein 1-like isoform X2 [Bos indicus]	-	-	-	-	GO:0031224//intrinsic component of membrane;GO:0044421//extracellular region part	GO:0043169//cation binding;GO:0060089//molecular transducer activity	GO:0007162//negative regulation of cell adhesion;GO:0007169//transmembrane receptor protein tyrosine kinase signaling pathway;GO:0007606//sensory perception of chemical stimulus;GO:0010596//negative regulation of endothelial cell migration;GO:0045765//regulation of angiogenesis;GO:0048869//cellular developmental process;GO:0050922//negative regulation of chemotaxis	--
miR-769-z	MSTRG.4101	784	803	-23.33	aCTCTGGA--CCTGAGAagggt	x|||||||xx||::|||xxxxx	tGAGACCTCCGGGTTCTgagct	--	-	-	-	-	-	-	-	-	--
miR-769-z	MSTRG.6869	591	612	-15.92	tCTCTGGAACACTATGGTTTtt	x|||||||xxx|:|x|::|:xx	tGAGACCTCCGGGTTCTGAGct	ABCC4	multidrug resistance-associated protein 4-like isoform X1 [Bos indicus x Bos taurus]	Environmental Information Processing;Organismal Systems;Environmental Information Processing;Human Diseases	Signal transduction;Digestive system;Membrane transport;Drug resistance: antineoplastic	ko04024//cAMP signaling pathway;ko04976//Bile secretion;ko02010//ABC transporters;ko01523//Antifolate resistance	K05673;K05673;K05673;K05673	GO:0030667//secretory granule membrane;GO:0031224//intrinsic component of membrane	GO:0015405//P-P-bond-hydrolysis-driven transmembrane transporter activity;GO:0016616//oxidoreductase activity, acting on the CH-OH group of donors, NAD or NADP as acceptor;GO:0016887//ATPase activity;GO:0032550//purine ribonucleoside binding	GO:0001775//cell activation;GO:0006811//ion transport;GO:0007599//hemostasis;GO:0008284//positive regulation of cell proliferation;GO:0009719//response to endogenous stimulus;GO:0010033//response to organic substance;GO:0015893//drug transport;GO:0044710//single-organism metabolic process	--
miR-27-z	MSTRG.10777	1524	1544	-12.68	cAGTGTCAGTGTCTTAccagg	x|||||||x:|xx|:|xxxxx	tTCACAGTGGCTAAGTtcttc	--	GRAM domain-containing protein 2B isoform X2 [Bos taurus]	Cellular Processes	Transport and catabolism	ko04146//Peroxisome	K00308	GO:0005737//cytoplasm;GO:0043231//intracellular membrane-bounded organelle	GO:0005515//protein binding;GO:0016647//oxidoreductase activity, acting on the CH-NH group of donors, oxygen as acceptor	GO:0006596//polyamine biosynthetic process;GO:0006598//polyamine catabolic process;GO:0009653//anatomical structure morphogenesis;GO:0016043//cellular component organization;GO:0031325//positive regulation of cellular metabolic process;GO:0031326//regulation of cellular biosynthetic process;GO:0044763//single-organism cellular process;GO:0048523//negative regulation of cellular process;GO:0048731…	--
miR-27-z	MSTRG.1213	1599	1619	-14.02	aAGTGTCAACGTGTCcctcca	x|||||||x||xx||xxxxxx	tTCACAGTGGCTAAGttcttc	--	-	-	-	-	-	-	-	-	--
miR-27-z	MSTRG.15958	2665	2688	-16.93	tAGTGTCAAGCTAGGTTCGACAcg	x|||||||xx|:x|:|||:|x|xx	tTCACAGT--GG-CTAAGTTCTtc	--	-	-	-	-	-	-	-	-	--
miR-27-z	MSTRG.17500	345	365	-16.36	aAGTGTCACAGGggtcctgct	x||||||||x|:xxxxxxxxx	tTCACAGTGGCTaagttcttc	C4B	complement C4 isoform X1 [Bos taurus]	Human Diseases;Human Diseases;Organismal Systems;Human Diseases	Immune disease;Infectious disease: bacterial;Immune system;Infectious disease: bacterial	ko05322//Systemic lupus erythematosus;ko05150//Staphylococcus aureus infection;ko04610//Complement and coagulation cascades;ko05133//Pertussis	K03989;K03989;K03989;K03989	GO:0016020//membrane;GO:0031988//membrane-bounded vesicle;GO:0044217//other organism part	GO:0001846//opsonin binding;GO:0061135//endopeptidase regulator activity	GO:0002237//response to molecule of bacterial origin;GO:0002673//regulation of acute inflammatory response;GO:0006956//complement activation;GO:0010466//negative regulation of peptidase activity;GO:0019724//B cell mediated immunity;GO:0043277//apoptotic cell clearance	--
miR-27-z	MSTRG.21230	402	422	-12.4	cAGTGTCAGTTGTTAGAGtcc	x|||||||x:x:||x:||xxx	tTCACAGTGGCTAAGTTCttc	NAP1L4	nucleosome assembly protein 1-like 4 isoform X2 [Erpetoichthys calabaricus]	-	-	-	-	GO:0043005//neuron projection;GO:0044297//cell body;GO:0044424//intracellular part	GO:0003723//RNA binding;GO:0005515//protein binding	GO:0034728//nucleosome organization	--
miR-27-z	MSTRG.28465	8	27	-16.03	gAGTGTCAC-GACTACAGAca	x||||||||x||x|xx|||xx	tTCACAGTGGCTAAGTTCTtc	--	Barrier-to-autointegration factor [Varanus komodoensis]	Human Diseases	Infectious disease: viral	ko05168//Herpes simplex virus 1 infection	K09228	GO:0031224//intrinsic component of membrane;GO:0042579//microbody	GO:0005515//protein binding;GO:0016647//oxidoreductase activity, acting on the CH-NH group of donors, oxygen as acceptor;GO:0043168//anion binding	GO:0006596//polyamine biosynthetic process;GO:0006598//polyamine catabolic process;GO:0031328//positive regulation of cellular biosynthetic process;GO:0044710//single-organism metabolic process	--
miR-27-z	MSTRG.3598	877	894	-18.75	gAGTGTCA---ATTAAGGAgt	x|||||||xxx|||x|:||xx	tTCACAGTGGCTAAGTTCTtc	OPTN	PREDICTED: optineurin isoform X2 [Bos mutus]	Cellular Processes	Transport and catabolism	ko04137//Mitophagy - animal	K19946	-	-	-	--
miR-27-z	MSTRG.4478	3457	3474	-16.07	aAGTGTCA--GGTT-GAGAgt	x|||||||xx|:||x:|||xx	tTCACAGTGGCTAAGTTCTtc	F52C9.6	endonuclease-reverse transcriptase [Babesia ovata]	-	-	-	-	-	-	-	--
miR-27-z	MSTRG.6892	186	208	-18.06	aAGTGTCAAGGACCTTTGAGGgt	x|||||||xx||xx||::||:xx	tTCACAGTGGCT--AAGTTCTtc	ABCC4	multidrug resistance-associated protein 4 [Bos taurus]	Environmental Information Processing;Organismal Systems;Environmental Information Processing;Human Diseases	Signal transduction;Digestive system;Membrane transport;Drug resistance: antineoplastic	ko04024//cAMP signaling pathway;ko04976//Bile secretion;ko02010//ABC transporters;ko01523//Antifolate resistance	K05673;K05673;K05673;K05673	GO:0030667//secretory granule membrane;GO:0031224//intrinsic component of membrane	GO:0015405//P-P-bond-hydrolysis-driven transmembrane transporter activity;GO:0016616//oxidoreductase activity, acting on the CH-OH group of donors, NAD or NADP as acceptor;GO:0017111//nucleoside-triphosphatase activity;GO:0032550//purine ribonucleoside binding	GO:0001775//cell activation;GO:0006821//chloride transport;GO:0007599//hemostasis;GO:0008284//positive regulation of cell proliferation;GO:0009719//response to endogenous stimulus;GO:0010033//response to organic substance;GO:0044710//single-organism metabolic process	--
miR-504-z	MSTRG.14602	1202	1225	-23.75	aCTGGGACCTCGTTGTAAGGGAgg	x||||||||xx|x:||x||:x|xx	aGACCCTGGT-CTGCACTCTGTct	ZNF671	zinc finger protein 28 homolog [Zalophus californianus]	Human Diseases	Infectious disease: viral	ko05168//Herpes simplex virus 1 infection	K09228	-	-	-	--
miR-504-z	MSTRG.31466	981	1003	-21.57	cCTGGGACCGACAAGT-ATACcga	x||||||||x|x|x||x|x||xxx	aGACCCTGG-TCTGCACTCTGtct	LONRF2	LOW QUALITY PROTEIN: LON peptidase N-terminal domain and RING finger protein 2 [Bos taurus]	-	-	-	-	-	GO:0046914//transition metal ion binding	GO:0019538//protein metabolic process	--
miR-504-z	MSTRG.4090	4259	4279	-35.96	cCTGGGAC-AGACG-GGGACAga	x|||||||x|||||x|:||||xx	aGACCCTGGTCTGCACTCTGTct	--	PREDICTED: basic salivary proline-rich protein 1-like isoform X2 [Bos indicus]	-	-	-	-	GO:0031224//intrinsic component of membrane;GO:0044421//extracellular region part	GO:0043169//cation binding;GO:0060089//molecular transducer activity	GO:0007162//negative regulation of cell adhesion;GO:0007169//transmembrane receptor protein tyrosine kinase signaling pathway;GO:0007606//sensory perception of chemical stimulus;GO:0010596//negative regulation of endothelial cell migration;GO:0045765//regulation of angiogenesis;GO:0048869//cellular developmental process;GO:0050922//negative regulation of chemotaxis	--
miR-504-z	MSTRG.6530	455	481	-28.15	tCTGGGACGAGAATGTCCAGGGACtcc	x|||||||x|||x:||xxx|:|||xxx	aGACCCTGGTCT-GCA---CTCTGtct	--	-	-	-	-	-	-	-	-	--
miR-504-z	MSTRG.9421	1436	1458	-18.48	cCTGGGACTTTATTTTAGAggag	x|||||||:xx|:x|x|||xxxx	aGACCCTGGTCTGCACTCTgtct	--	thymocyte nuclear protein 1 isoform X2 [Odocoileus virginianus texanus]	-	-	-	-	-	-	-	--
miR-424-x	MSTRG.10777	89	109	-14.53	tTCGTCGTTGtttctgggtcg	x||||||||:xxxxxxxxxxx	cAGCAGCAATtcatgttttga	--	GRAM domain-containing protein 2B isoform X2 [Bos taurus]	Cellular Processes	Transport and catabolism	ko04146//Peroxisome	K00308	GO:0005737//cytoplasm;GO:0043231//intracellular membrane-bounded organelle	GO:0005515//protein binding;GO:0016647//oxidoreductase activity, acting on the CH-NH group of donors, oxygen as acceptor	GO:0006596//polyamine biosynthetic process;GO:0006598//polyamine catabolic process;GO:0009653//anatomical structure morphogenesis;GO:0016043//cellular component organization;GO:0031325//positive regulation of cellular metabolic process;GO:0031326//regulation of cellular biosynthetic process;GO:0044763//single-organism cellular process;GO:0048523//negative regulation of cellular process;GO:0048731…	--
miR-424-x	MSTRG.1213	1151	1170	-16.22	cTCGTCGT-ACGTCCGGAAcc	x|||||||x|x||x|::||xx	cAGCAGCAATTCATGTTTTga	--	-	-	-	-	-	-	-	-	--
miR-424-x	MSTRG.1430	739	758	-15.51	tTCGTCGTCG-GTTTGAAGcc	x|||||||x:x||x::||:xx	cAGCAGCAATTCATGTTTTga	FBXO30	PREDICTED: F-box only protein 30 [Bison bison bison]	-	-	-	-	-	GO:0004721//phosphoprotein phosphatase activity;GO:0019787//ubiquitin-like protein transferase activity;GO:0030247//polysaccharide binding;GO:0046914//transition metal ion binding	GO:0006470//protein dephosphorylation;GO:0032446//protein modification by small protein conjugation	--
miR-424-x	MSTRG.17500	979	999	-11.21	cTCGTCGTCAGCGT-TAAccct	x|||||||x|:x||x:||xxxx	cAGCAGCAATT-CATGTTttga	C4B	complement C4 isoform X1 [Bos taurus]	Human Diseases;Human Diseases;Organismal Systems;Human Diseases	Immune disease;Infectious disease: bacterial;Immune system;Infectious disease: bacterial	ko05322//Systemic lupus erythematosus;ko05150//Staphylococcus aureus infection;ko04610//Complement and coagulation cascades;ko05133//Pertussis	K03989;K03989;K03989;K03989	GO:0016020//membrane;GO:0031988//membrane-bounded vesicle;GO:0044217//other organism part	GO:0001846//opsonin binding;GO:0061135//endopeptidase regulator activity	GO:0002237//response to molecule of bacterial origin;GO:0002673//regulation of acute inflammatory response;GO:0006956//complement activation;GO:0010466//negative regulation of peptidase activity;GO:0019724//B cell mediated immunity;GO:0043277//apoptotic cell clearance	--
miR-424-x	MSTRG.21507	1767	1787	-14.3	aTCGTCGTGAGGTCCAccggc	x|||||||x|:||x||xxxxx	cAGCAGCAATTCATGTtttga	Slc29a2	equilibrative nucleoside transporter 2 isoform X2 [Bos taurus]	Human Diseases	Substance dependence	ko05034//Alcoholism	K15014	GO:0016021//integral component of membrane;GO:0031090//organelle membrane;GO:0043231//intracellular membrane-bounded organelle;GO:0043232//intracellular non-membrane-bounded organelle	GO:0015932//nucleobase-containing compound transmembrane transporter activity	GO:0006725//cellular aromatic compound metabolic process;GO:0006863//purine nucleobase transport;GO:0007589//body fluid secretion;GO:0015855//pyrimidine nucleobase transport;GO:0015864//pyrimidine nucleoside transport;GO:0032868//response to insulin;GO:0044763//single-organism cellular process	--
miR-424-x	MSTRG.27704	1747	1767	-11.11	tTCGTCGTCATCTAAAcgttg	x|||||||x|xx||x|xxxxx	cAGCAGCAATTCATGTtttga	pol	PREDICTED: endogenous retrovirus group K member 19 Env polyprotein-like [Bison bison bison]	-	-	-	-	GO:0019012//virion;GO:0030131//clathrin adaptor complex;GO:0030135//coated vesicle;GO:0036464//cytoplasmic ribonucleoprotein granule	GO:0000175//3'-5'-exoribonuclease activity;GO:0008289//lipid binding;GO:0015631//tubulin binding;GO:0016740//transferase activity;GO:0043167//ion binding;GO:0044822//poly(A) RNA binding	GO:0001649//osteoblast differentiation;GO:0002237//response to molecule of bacterial origin;GO:0006259//DNA metabolic process;GO:0007009//plasma membrane organization;GO:0007623//circadian rhythm;GO:0022618//ribonucleoprotein complex assembly;GO:0043488//regulation of mRNA stability;GO:0045597//positive regulation of cell differentiation;GO:0045807//positive regulation of endocytosis;GO:0090501//…	--
miR-424-x	MSTRG.4478	4614	4636	-19.63	tTCGTCGTCACTGGTATAGAAtc	x|||||||x|xx:|||:|:||xx	cAGCAGCAAT--TCATGTTTTga	F52C9.6	endonuclease-reverse transcriptase [Babesia ovata]	-	-	-	-	-	-	-	--
miR-424-x	MSTRG.9563	2920	2939	-17.4	tTCGTCGTTG-GCACAGAAgc	x||||||||:x|x|||:||xx	cAGCAGCAATTCATGTTTTga	AHNAK2	PREDICTED: protein AHNAK2 [Bos mutus]	Human Diseases	Infectious disease: bacterial	ko05132//Salmonella infection	K23934	GO:0012506//vesicle membrane;GO:0031674//I band;GO:0044459//plasma membrane part	-	GO:0007009//plasma membrane organization	--
miR-9993-y	MSTRG.14602	63	78	-20.4	tAGAGCGAGC--GGAagg	x|||||||x|xx|||xxx	aTCTCGCTGGGGCCTcca	ZNF671	zinc finger protein 28 homolog [Zalophus californianus]	Human Diseases	Infectious disease: viral	ko05168//Herpes simplex virus 1 infection	K09228	-	-	-	--
miR-9993-y	MSTRG.5364	283	302	-18.57	cAGAGCGATACAACGGGtcc	x|||||||:x|xx|||:xxx	aTCTCGCTGGG--GCCTcca	--	type I cytoskeletal 19-like protein [Labeo rohita]	Metabolism;Metabolism	Global and overview maps;Carbohydrate metabolism	ko01100//Metabolic pathways;ko00650//Butanoate metabolism	K00109;K00109	-	-	-	--
miR-335-y	MSTRG.1430	473	496	-12.96	tAAAAGTATACTAAAGGCGAgacg	x|||||||x|x|||x|:x||xxxx	tTTTTCAT-T-ATTGCTCCTgacc	FBXO30	PREDICTED: F-box only protein 30 [Bison bison bison]	-	-	-	-	-	GO:0004721//phosphoprotein phosphatase activity;GO:0019787//ubiquitin-like protein transferase activity;GO:0030247//polysaccharide binding;GO:0046914//transition metal ion binding	GO:0006470//protein dephosphorylation;GO:0032446//protein modification by small protein conjugation	--
miR-335-y	MSTRG.21230	74	95	-11.99	aAAAAGTATAAATGCCGGTTga	x|||||||xx||:|xx|::|xx	tTTTTCATTATTGCTCCTGAcc	NAP1L4	nucleosome assembly protein 1-like 4 isoform X2 [Erpetoichthys calabaricus]	-	-	-	-	GO:0043005//neuron projection;GO:0044297//cell body;GO:0044424//intracellular part	GO:0003723//RNA binding;GO:0005515//protein binding	GO:0034728//nucleosome organization	--
miR-335-y	MSTRG.27704	559	583	-11.78	gAAAAGTAGACCAAATGATCGCTag	x|||||||:xxxx||:||xx:||xx	tTTTTCATTA---TTGCTCCTGAcc	pol	PREDICTED: endogenous retrovirus group K member 19 Env polyprotein-like [Bison bison bison]	-	-	-	-	GO:0019012//virion;GO:0030131//clathrin adaptor complex;GO:0030135//coated vesicle;GO:0036464//cytoplasmic ribonucleoprotein granule	GO:0000175//3'-5'-exoribonuclease activity;GO:0008289//lipid binding;GO:0015631//tubulin binding;GO:0016740//transferase activity;GO:0043167//ion binding;GO:0044822//poly(A) RNA binding	GO:0001649//osteoblast differentiation;GO:0002237//response to molecule of bacterial origin;GO:0006259//DNA metabolic process;GO:0007009//plasma membrane organization;GO:0007623//circadian rhythm;GO:0022618//ribonucleoprotein complex assembly;GO:0043488//regulation of mRNA stability;GO:0045597//positive regulation of cell differentiation;GO:0045807//positive regulation of endocytosis;GO:0090501//…	--
miR-335-y	MSTRG.3598	1222	1244	-11.37	aAAAAGTAAGTCAAGACTACccg	x||||||||x|x|x||xx||xxx	tTTTTCATT-ATTGCTCCTGacc	OPTN	PREDICTED: optineurin isoform X2 [Bos mutus]	Cellular Processes	Transport and catabolism	ko04137//Mitophagy - animal	K19946	-	-	-	--
miR-335-y	MSTRG.6892	237	257	-10.71	aAAAAGTA-TAGCAAGAAacag	x|||||||x||:|x||x|xxxx	tTTTTCATTATTGCTCCTgacc	ABCC4	multidrug resistance-associated protein 4 [Bos taurus]	Environmental Information Processing;Organismal Systems;Environmental Information Processing;Human Diseases	Signal transduction;Digestive system;Membrane transport;Drug resistance: antineoplastic	ko04024//cAMP signaling pathway;ko04976//Bile secretion;ko02010//ABC transporters;ko01523//Antifolate resistance	K05673;K05673;K05673;K05673	GO:0030667//secretory granule membrane;GO:0031224//intrinsic component of membrane	GO:0015405//P-P-bond-hydrolysis-driven transmembrane transporter activity;GO:0016616//oxidoreductase activity, acting on the CH-OH group of donors, NAD or NADP as acceptor;GO:0017111//nucleoside-triphosphatase activity;GO:0032550//purine ribonucleoside binding	GO:0001775//cell activation;GO:0006821//chloride transport;GO:0007599//hemostasis;GO:0008284//positive regulation of cell proliferation;GO:0009719//response to endogenous stimulus;GO:0010033//response to organic substance;GO:0044710//single-organism metabolic process	--
miR-335-y	MSTRG.7126	42	63	-10.8	cAAAAGTAATCACGtttgagag	x|||||||||x|||xxxxxxxx	tTTTTCATTATTGCtcctgacc	Mycbp2	PREDICTED: E3 ubiquitin-protein ligase MYCBP2 isoform X1 [Equus przewalskii]	Organismal Systems	Development and regeneration	ko04361//Axon regeneration	K10693	GO:0005856//cytoskeleton;GO:0043005//neuron projection;GO:0043231//intracellular membrane-bounded organelle	GO:0003824//catalytic activity;GO:0046914//transition metal ion binding;GO:0046983//protein dimerization activity	GO:0008045//motor neuron axon guidance;GO:0008104//protein localization;GO:0009895//negative regulation of catabolic process;GO:0010468//regulation of gene expression;GO:0021955//central nervous system neuron axonogenesis;GO:0032446//protein modification by small protein conjugation;GO:0033043//regulation of organelle organization;GO:0034645//cellular macromolecule biosynthetic process	--
miR-204-x	MSTRG.13424	236	257	-18.89	aAGGGAAACAGACGTAgtcaac	x||||||||||xx|x|xxxxxx	tTCCCTTTGTCATCCTatgcct	COBLL1	cordon-bleu protein-like 1 [Bos indicus x Bos taurus]	-	-	-	-	GO:0031988//membrane-bounded vesicle	-	-	--
miR-204-x	MSTRG.13725	661	684	-23.02	gAGGGAAATCAGGTGGGTCACtcg	x|||||||x|||xx||:|x||xxx	tTCCCTTT-GTCATCCTA-TGcct	--	serine/arginine repetitive matrix protein 2-like, partial [Bos taurus]	-	-	-	-	-	-	-	--
miR-204-x	MSTRG.21307	162	183	-18.19	gAGGGAAACCGTctcccgagga	x||||||||x||xxxxxxxxxx	tTCCCTTTGTCAtcctatgcct	MRGPRF	mas-related G-protein coupled receptor member F isoform X1 [Neogale vison]	-	-	-	-	GO:0031224//intrinsic component of membrane;GO:0031988//membrane-bounded vesicle	GO:0004888//transmembrane signaling receptor activity	GO:0007166//cell surface receptor signaling pathway	--
miR-204-x	MSTRG.32506	825	848	-25.99	aAGGGAAAAGAGGAAGGGTCCGga	x|||||||x:xx|x|||:|x||xx	tTCCCTTTGT--CATCCTATGCct	--	probable inactive serine/threonine-protein kinase slob2 isoform X1 [Vicugna pacos]	-	-	-	-	-	-	-	--
miR-204-x	MSTRG.4090	12989	13007	-19.77	aAGGGAAAC--TGGGA-ACcca	x||||||||xx|:|||x||xxx	tTCCCTTTGTCATCCTATGcct	--	PREDICTED: basic salivary proline-rich protein 1-like isoform X2 [Bos indicus]	-	-	-	-	GO:0031224//intrinsic component of membrane;GO:0044421//extracellular region part	GO:0043169//cation binding;GO:0060089//molecular transducer activity	GO:0007162//negative regulation of cell adhesion;GO:0007169//transmembrane receptor protein tyrosine kinase signaling pathway;GO:0007606//sensory perception of chemical stimulus;GO:0010596//negative regulation of endothelial cell migration;GO:0045765//regulation of angiogenesis;GO:0048869//cellular developmental process;GO:0050922//negative regulation of chemotaxis	--
miR-204-x	MSTRG.6482	563	587	-20.79	aAGGGAAAAAGATTGAGGAggaggt	x|||||||x||x|xx||||xxxxxx	tTCCCTTTGTC-A--TCCTatgcct	--	Collagen alpha-1(XXI) chain [Varanus komodoensis]	-	-	-	-	GO:0016020//membrane	-	-	--
miR-211-z	MSTRG.13424	236	257	-18.89	aAGGGAAACAGACGTAgtcaac	x||||||||||xx|x|xxxxxx	tTCCCTTTGTCATCCTatgcct	COBLL1	cordon-bleu protein-like 1 [Bos indicus x Bos taurus]	-	-	-	-	GO:0031988//membrane-bounded vesicle	-	-	--
miR-211-z	MSTRG.13725	661	684	-23.02	gAGGGAAATCAGGTGGGTCACtcg	x|||||||x|||xx||:|x||xxx	tTCCCTTT-GTCATCCTA-TGcct	--	serine/arginine repetitive matrix protein 2-like, partial [Bos taurus]	-	-	-	-	-	-	-	--
miR-211-z	MSTRG.21307	162	183	-18.19	gAGGGAAACCGTctcccgagga	x||||||||x||xxxxxxxxxx	tTCCCTTTGTCAtcctatgcct	MRGPRF	mas-related G-protein coupled receptor member F isoform X1 [Neogale vison]	-	-	-	-	GO:0031224//intrinsic component of membrane;GO:0031988//membrane-bounded vesicle	GO:0004888//transmembrane signaling receptor activity	GO:0007166//cell surface receptor signaling pathway	--
miR-211-z	MSTRG.32506	825	848	-25.99	aAGGGAAAAGAGGAAGGGTCCGga	x|||||||x:xx|x|||:|x||xx	tTCCCTTTGT--CATCCTATGCct	--	probable inactive serine/threonine-protein kinase slob2 isoform X1 [Vicugna pacos]	-	-	-	-	-	-	-	--
miR-211-z	MSTRG.4090	12989	13007	-19.77	aAGGGAAAC--TGGGA-ACcca	x||||||||xx|:|||x||xxx	tTCCCTTTGTCATCCTATGcct	--	PREDICTED: basic salivary proline-rich protein 1-like isoform X2 [Bos indicus]	-	-	-	-	GO:0031224//intrinsic component of membrane;GO:0044421//extracellular region part	GO:0043169//cation binding;GO:0060089//molecular transducer activity	GO:0007162//negative regulation of cell adhesion;GO:0007169//transmembrane receptor protein tyrosine kinase signaling pathway;GO:0007606//sensory perception of chemical stimulus;GO:0010596//negative regulation of endothelial cell migration;GO:0045765//regulation of angiogenesis;GO:0048869//cellular developmental process;GO:0050922//negative regulation of chemotaxis	--
miR-211-z	MSTRG.6482	563	587	-20.79	aAGGGAAAAAGATTGAGGAggaggt	x|||||||x||x|xx||||xxxxxx	tTCCCTTTGTC-A--TCCTatgcct	--	Collagen alpha-1(XXI) chain [Varanus komodoensis]	-	-	-	-	GO:0016020//membrane	-	-	--
miR-136-x	MSTRG.1430	1104	1125	-17.76	aGAGGTAAACAATTCAATGAaa	x|||||||||||xx|x|:x|xx	aCTCCATTTGTTTTGATGATgg	FBXO30	PREDICTED: F-box only protein 30 [Bison bison bison]	-	-	-	-	-	GO:0004721//phosphoprotein phosphatase activity;GO:0019787//ubiquitin-like protein transferase activity;GO:0030247//polysaccharide binding;GO:0046914//transition metal ion binding	GO:0006470//protein dephosphorylation;GO:0032446//protein modification by small protein conjugation	--
miR-136-x	MSTRG.15958	4440	4462	-15.41	cGAGGTAAAGAAGGTGGACTtat	x||||||||x||:::xx|||xxx	aCTCCATTTGTTTTGA-TGAtgg	--	-	-	-	-	-	-	-	-	--
miR-136-x	MSTRG.3753	817	839	-15.55	cGAGGTAATCGTAGTTTACTAaa	x|||||||x|:x|::|x||||xx	aCTCCATTTGTTTTGA-TGATgg	WAC	WW domain-containing adapter protein with coiled-coil isoform X2 [Bos taurus]	-	-	-	-	GO:0016604//nuclear body;GO:0030529//intracellular ribonucleoprotein complex	GO:0001099//basal RNA polymerase II transcription machinery binding	GO:0000077//DNA damage checkpoint;GO:0006355//regulation of transcription, DNA-templated;GO:0006513//protein monoubiquitination;GO:0010508//positive regulation of autophagy;GO:0031330//negative regulation of cellular catabolic process;GO:0033523//histone H2B ubiquitination	--
miR-136-x	MSTRG.7126	510	531	-13.18	aGAGGTAAGAAGTAATTCTGtg	x|||||||:x|:x|x|x||:xx	aCTCCATTTGTTTTGATGATgg	Mycbp2	PREDICTED: E3 ubiquitin-protein ligase MYCBP2 isoform X1 [Equus przewalskii]	Organismal Systems	Development and regeneration	ko04361//Axon regeneration	K10693	GO:0005856//cytoskeleton;GO:0043005//neuron projection;GO:0043231//intracellular membrane-bounded organelle	GO:0003824//catalytic activity;GO:0046914//transition metal ion binding;GO:0046983//protein dimerization activity	GO:0008045//motor neuron axon guidance;GO:0008104//protein localization;GO:0009895//negative regulation of catabolic process;GO:0010468//regulation of gene expression;GO:0021955//central nervous system neuron axonogenesis;GO:0032446//protein modification by small protein conjugation;GO:0033043//regulation of organelle organization;GO:0034645//cellular macromolecule biosynthetic process	--
miR-6519-z	MSTRG.17500	690	710	-15.82	gTCGTCGCgaaccgctgcccc	x|||||||xxxxxxxxxxxxx	tAGCAGCGggaacagtaaaaa	C4B	complement C4 isoform X1 [Bos taurus]	Human Diseases;Human Diseases;Organismal Systems;Human Diseases	Immune disease;Infectious disease: bacterial;Immune system;Infectious disease: bacterial	ko05322//Systemic lupus erythematosus;ko05150//Staphylococcus aureus infection;ko04610//Complement and coagulation cascades;ko05133//Pertussis	K03989;K03989;K03989;K03989	GO:0016020//membrane;GO:0031988//membrane-bounded vesicle;GO:0044217//other organism part	GO:0001846//opsonin binding;GO:0061135//endopeptidase regulator activity	GO:0002237//response to molecule of bacterial origin;GO:0002673//regulation of acute inflammatory response;GO:0006956//complement activation;GO:0010466//negative regulation of peptidase activity;GO:0019724//B cell mediated immunity;GO:0043277//apoptotic cell clearance	--
miR-6519-z	MSTRG.21507	461	481	-20.37	gTCGTCGCCGTCGACGCTctc	x||||||||x|x|x|:x|xxx	tAGCAGCGGGAACAGTAAaaa	Slc29a2	equilibrative nucleoside transporter 2 isoform X2 [Bos taurus]	Human Diseases	Substance dependence	ko05034//Alcoholism	K15014	GO:0016021//integral component of membrane;GO:0031090//organelle membrane;GO:0043231//intracellular membrane-bounded organelle;GO:0043232//intracellular non-membrane-bounded organelle	GO:0015932//nucleobase-containing compound transmembrane transporter activity	GO:0006725//cellular aromatic compound metabolic process;GO:0006863//purine nucleobase transport;GO:0007589//body fluid secretion;GO:0015855//pyrimidine nucleobase transport;GO:0015864//pyrimidine nucleoside transport;GO:0032868//response to insulin;GO:0044763//single-organism cellular process	--
miR-6519-z	MSTRG.9896	1537	1557	-18.3	gTCGTCGCGGTCGGCCTagga	x|||||||xx|x|x|x|xxxx	tAGCAGCGGGAACAGTAaaaa	--	IQ motif and ankyrin repeat domain-containing protein 1 isoform X4 [Cervus canadensis]	-	-	-	-	-	-	-	--
miR-542-y	MSTRG.17500	2486	2507	-13.04	cCACTGTCCTGCAACGAACctc	x|||||||xx:|x|xxx||xxx	tGTGACAGATTGATAACTGaaa	C4B	complement C4 isoform X1 [Bos taurus]	Human Diseases;Human Diseases;Organismal Systems;Human Diseases	Immune disease;Infectious disease: bacterial;Immune system;Infectious disease: bacterial	ko05322//Systemic lupus erythematosus;ko05150//Staphylococcus aureus infection;ko04610//Complement and coagulation cascades;ko05133//Pertussis	K03989;K03989;K03989;K03989	GO:0016020//membrane;GO:0031988//membrane-bounded vesicle;GO:0044217//other organism part	GO:0001846//opsonin binding;GO:0061135//endopeptidase regulator activity	GO:0002237//response to molecule of bacterial origin;GO:0002673//regulation of acute inflammatory response;GO:0006956//complement activation;GO:0010466//negative regulation of peptidase activity;GO:0019724//B cell mediated immunity;GO:0043277//apoptotic cell clearance	--
miR-542-y	MSTRG.18722	34	56	-18.04	gCACTGTCCTGGAGGTGGGCcgg	x|||||||x|::xx:|x|:|xxx	tGTGACAG-ATTGATAACTGaaa	DMBT1	PREDICTED: deleted in malignant brain tumors 1 protein isoform X6 [Bison bison bison]	Organismal Systems	Digestive system	ko04970//Salivary secretion	K13912	GO:0030666//endocytic vesicle membrane;GO:0030667//secretory granule membrane;GO:0031012//extracellular matrix;GO:0044421//extracellular region part;GO:0044425//membrane part	GO:0019899//enzyme binding;GO:0038023//signaling receptor activity;GO:0038024//cargo receptor activity	GO:0001701//in utero embryonic development;GO:0002758//innate immune response-activating signal transduction;GO:0006897//endocytosis;GO:0008283//cell proliferation;GO:0019731//antibacterial humoral response;GO:0030856//regulation of epithelial cell differentiation	--
miR-542-y	MSTRG.28465	1038	1058	-13.83	tCACTGTCTC-TTCGTCACTtt	x||||||||xx:|xx|x|||xx	tGTGACAGATTGATAACTGAaa	--	Barrier-to-autointegration factor [Varanus komodoensis]	Human Diseases	Infectious disease: viral	ko05168//Herpes simplex virus 1 infection	K09228	GO:0031224//intrinsic component of membrane;GO:0042579//microbody	GO:0005515//protein binding;GO:0016647//oxidoreductase activity, acting on the CH-NH group of donors, oxygen as acceptor;GO:0043168//anion binding	GO:0006596//polyamine biosynthetic process;GO:0006598//polyamine catabolic process;GO:0031328//positive regulation of cellular biosynthetic process;GO:0044710//single-organism metabolic process	--
miR-542-y	MSTRG.4478	4233	4253	-11.73	tCACTGTC-ACCTGCTctccct	x|||||||x|x||:x|xxxxxx	tGTGACAGATTGATAActgaaa	F52C9.6	endonuclease-reverse transcriptase [Babesia ovata]	-	-	-	-	-	-	-	--
miR-503-x	MSTRG.17500	692	710	-15.4	gTCGTCGCgaaccgctgcc	x|||||||xxxxxxxxxxx	tAGCAGCGggaacagtaaa	C4B	complement C4 isoform X1 [Bos taurus]	Human Diseases;Human Diseases;Organismal Systems;Human Diseases	Immune disease;Infectious disease: bacterial;Immune system;Infectious disease: bacterial	ko05322//Systemic lupus erythematosus;ko05150//Staphylococcus aureus infection;ko04610//Complement and coagulation cascades;ko05133//Pertussis	K03989;K03989;K03989;K03989	GO:0016020//membrane;GO:0031988//membrane-bounded vesicle;GO:0044217//other organism part	GO:0001846//opsonin binding;GO:0061135//endopeptidase regulator activity	GO:0002237//response to molecule of bacterial origin;GO:0002673//regulation of acute inflammatory response;GO:0006956//complement activation;GO:0010466//negative regulation of peptidase activity;GO:0019724//B cell mediated immunity;GO:0043277//apoptotic cell clearance	--
miR-503-x	MSTRG.21507	463	481	-20.37	gTCGTCGCCGTCGACGctc	x||||||||x|x|x|:xxx	tAGCAGCGGGAACAGTaaa	Slc29a2	equilibrative nucleoside transporter 2 isoform X2 [Bos taurus]	Human Diseases	Substance dependence	ko05034//Alcoholism	K15014	GO:0016021//integral component of membrane;GO:0031090//organelle membrane;GO:0043231//intracellular membrane-bounded organelle;GO:0043232//intracellular non-membrane-bounded organelle	GO:0015932//nucleobase-containing compound transmembrane transporter activity	GO:0006725//cellular aromatic compound metabolic process;GO:0006863//purine nucleobase transport;GO:0007589//body fluid secretion;GO:0015855//pyrimidine nucleobase transport;GO:0015864//pyrimidine nucleoside transport;GO:0032868//response to insulin;GO:0044763//single-organism cellular process	--
miR-503-x	MSTRG.9896	1539	1557	-18.3	gTCGTCGCGGTCGGCCTag	x|||||||xx|x|x|x|xx	tAGCAGCGGGAACAGTAaa	--	IQ motif and ankyrin repeat domain-containing protein 1 isoform X4 [Cervus canadensis]	-	-	-	-	-	-	-	--
miR-497-x	MSTRG.10777	90	109	-13.29	tTCGTCGT-TGTTTCTGGGtc	x|||||||x||x:x|::::xx	cAGCAGCACACTGTGGTTTgt	--	GRAM domain-containing protein 2B isoform X2 [Bos taurus]	Cellular Processes	Transport and catabolism	ko04146//Peroxisome	K00308	GO:0005737//cytoplasm;GO:0043231//intracellular membrane-bounded organelle	GO:0005515//protein binding;GO:0016647//oxidoreductase activity, acting on the CH-NH group of donors, oxygen as acceptor	GO:0006596//polyamine biosynthetic process;GO:0006598//polyamine catabolic process;GO:0009653//anatomical structure morphogenesis;GO:0016043//cellular component organization;GO:0031325//positive regulation of cellular metabolic process;GO:0031326//regulation of cellular biosynthetic process;GO:0044763//single-organism cellular process;GO:0048523//negative regulation of cellular process;GO:0048731…	--
miR-497-x	MSTRG.1213	1146	1170	-17.3	cTCGTCGTACGTCCGGAACCAGtgc	x|||||||xx||xx|:x||||:xxx	cAGCAGCA--CA--CTGTGGTTtgt	--	-	-	-	-	-	-	-	-	--
miR-497-x	MSTRG.1430	734	758	-23.08	tTCGTCGTCGGTTTGAAGCCCAAca	x|||||||x|xxx|||x:||x||xx	cAGCAGCA-C---ACTGTGGTTTgt	FBXO30	PREDICTED: F-box only protein 30 [Bison bison bison]	-	-	-	-	-	GO:0004721//phosphoprotein phosphatase activity;GO:0019787//ubiquitin-like protein transferase activity;GO:0030247//polysaccharide binding;GO:0046914//transition metal ion binding	GO:0006470//protein dephosphorylation;GO:0032446//protein modification by small protein conjugation	--
miR-497-x	MSTRG.17500	980	999	-14.47	cTCGTCGTCAG-CGTTAAccc	x|||||||xx|x|:::||xxx	cAGCAGCACACTGTGGTTtgt	C4B	complement C4 isoform X1 [Bos taurus]	Human Diseases;Human Diseases;Organismal Systems;Human Diseases	Immune disease;Infectious disease: bacterial;Immune system;Infectious disease: bacterial	ko05322//Systemic lupus erythematosus;ko05150//Staphylococcus aureus infection;ko04610//Complement and coagulation cascades;ko05133//Pertussis	K03989;K03989;K03989;K03989	GO:0016020//membrane;GO:0031988//membrane-bounded vesicle;GO:0044217//other organism part	GO:0001846//opsonin binding;GO:0061135//endopeptidase regulator activity	GO:0002237//response to molecule of bacterial origin;GO:0002673//regulation of acute inflammatory response;GO:0006956//complement activation;GO:0010466//negative regulation of peptidase activity;GO:0019724//B cell mediated immunity;GO:0043277//apoptotic cell clearance	--
miR-497-x	MSTRG.21507	1220	1239	-15.19	tTCGTCGTCT-ACCCCAActt	x|||||||x|x||x||||xxx	cAGCAGCACACTGTGGTTtgt	Slc29a2	equilibrative nucleoside transporter 2 isoform X2 [Bos taurus]	Human Diseases	Substance dependence	ko05034//Alcoholism	K15014	GO:0016021//integral component of membrane;GO:0031090//organelle membrane;GO:0043231//intracellular membrane-bounded organelle;GO:0043232//intracellular non-membrane-bounded organelle	GO:0015932//nucleobase-containing compound transmembrane transporter activity	GO:0006725//cellular aromatic compound metabolic process;GO:0006863//purine nucleobase transport;GO:0007589//body fluid secretion;GO:0015855//pyrimidine nucleobase transport;GO:0015864//pyrimidine nucleoside transport;GO:0032868//response to insulin;GO:0044763//single-organism cellular process	--
miR-497-x	MSTRG.27704	1750	1767	-15.91	tTCGTCGTC--AT-CTAAAcg	x|||||||xxx|:x|:|||xx	cAGCAGCACACTGTGGTTTgt	pol	PREDICTED: endogenous retrovirus group K member 19 Env polyprotein-like [Bison bison bison]	-	-	-	-	GO:0019012//virion;GO:0030131//clathrin adaptor complex;GO:0030135//coated vesicle;GO:0036464//cytoplasmic ribonucleoprotein granule	GO:0000175//3'-5'-exoribonuclease activity;GO:0008289//lipid binding;GO:0015631//tubulin binding;GO:0016740//transferase activity;GO:0043167//ion binding;GO:0044822//poly(A) RNA binding	GO:0001649//osteoblast differentiation;GO:0002237//response to molecule of bacterial origin;GO:0006259//DNA metabolic process;GO:0007009//plasma membrane organization;GO:0007623//circadian rhythm;GO:0022618//ribonucleoprotein complex assembly;GO:0043488//regulation of mRNA stability;GO:0045597//positive regulation of cell differentiation;GO:0045807//positive regulation of endocytosis;GO:0090501//…	--
miR-497-x	MSTRG.4478	4129	4148	-16.85	tTCGTCGTGA-ACCCCGttcc	x||||||||xx||x||:xxxx	cAGCAGCACACTGTGGTttgt	F52C9.6	endonuclease-reverse transcriptase [Babesia ovata]	-	-	-	-	-	-	-	--
miR-497-x	MSTRG.9563	2920	2939	-21.11	tTCGTCGT-TGGCACAGAAgc	x|||||||x||:|||x:||xx	cAGCAGCACACTGTGGTTTgt	AHNAK2	PREDICTED: protein AHNAK2 [Bos mutus]	Human Diseases	Infectious disease: bacterial	ko05132//Salmonella infection	K23934	GO:0012506//vesicle membrane;GO:0031674//I band;GO:0044459//plasma membrane part	-	GO:0007009//plasma membrane organization	--
miR-493-y	MSTRG.1213	3160	3181	-23.92	aCTTCCAGGAGTCACAGGacgg	x|||||||:x|x||||x|xxxx	tGAAGGTCTACTGTGTGCcagg	--	-	-	-	-	-	-	-	-	--
miR-493-y	MSTRG.21507	1523	1544	-24.35	tCTTCCAGTACTCCCACGGcca	x|||||||xxxx|x|||||xxx	tGAAGGTCTACTGTGTGCCagg	Slc29a2	equilibrative nucleoside transporter 2 isoform X2 [Bos taurus]	Human Diseases	Substance dependence	ko05034//Alcoholism	K15014	GO:0016021//integral component of membrane;GO:0031090//organelle membrane;GO:0043231//intracellular membrane-bounded organelle;GO:0043232//intracellular non-membrane-bounded organelle	GO:0015932//nucleobase-containing compound transmembrane transporter activity	GO:0006725//cellular aromatic compound metabolic process;GO:0006863//purine nucleobase transport;GO:0007589//body fluid secretion;GO:0015855//pyrimidine nucleobase transport;GO:0015864//pyrimidine nucleoside transport;GO:0032868//response to insulin;GO:0044763//single-organism cellular process	--
miR-10955-z	MSTRG.15630	342	363	-24.37	tGGGGCATCGACGCCCGacgct	x|||||||xxxx|||||xxxxx	tCCCCGTA----CGGGCcacca	--	protein N-lysine methyltransferase METTL21A isoform X3 [Ovis aries]	-	-	-	-	GO:0031224//intrinsic component of membrane;GO:0044421//extracellular region part	GO:0043169//cation binding;GO:0060089//molecular transducer activity	GO:0007162//negative regulation of cell adhesion;GO:0007169//transmembrane receptor protein tyrosine kinase signaling pathway;GO:0007606//sensory perception of chemical stimulus;GO:0010596//negative regulation of endothelial cell migration;GO:0045765//regulation of angiogenesis;GO:0048869//cellular developmental process;GO:0050922//negative regulation of chemotaxis	--
miR-10955-z	MSTRG.29222	8623	8640	-17.43	gGGGGCATcttttagagg	x|||||||xxxxxxxxxx	tCCCCGTAcgggccacca	--	serine/arginine repetitive matrix protein 1-like [Zalophus californianus]	-	-	-	-	GO:0042579//microbody	GO:0005515//protein binding;GO:0016647//oxidoreductase activity, acting on the CH-NH group of donors, oxygen as acceptor	GO:0006596//polyamine biosynthetic process;GO:0006598//polyamine catabolic process;GO:0031328//positive regulation of cellular biosynthetic process;GO:0044710//single-organism metabolic process;GO:0051234//establishment of localization	--
miR-10955-z	MSTRG.33557	604	621	-22.21	gGGGGCATCGGCGGctag	x|||||||xxx|||xxxx	tCCCCGTACGGGCCacca	ARHGAP6	rho GTPase-activating protein 6 isoform X2 [Bos indicus x Bos taurus]	-	-	-	-	GO:0015629//actin cytoskeleton;GO:0044444//cytoplasmic part	GO:0019899//enzyme binding;GO:0019904//protein domain specific binding;GO:0030674//protein binding, bridging;GO:0060229//lipase activator activity	GO:0001953//negative regulation of cell-matrix adhesion;GO:0007045//cell-substrate adherens junction assembly;GO:0008154//actin polymerization or depolymerization;GO:0010863//positive regulation of phospholipase C activity;GO:0032232//negative regulation of actin filament bundle assembly;GO:0043087//regulation of GTPase activity	--
miR-5119-z	MSTRG.14602	454	472	-19.36	tGTGTAGGAGCTTCCAgtg	x||||||||x|::|x|xxx	tCACATCCT-GGGGCTgga	ZNF671	zinc finger protein 28 homolog [Zalophus californianus]	Human Diseases	Infectious disease: viral	ko05168//Herpes simplex virus 1 infection	K09228	-	-	-	--
miR-5119-z	MSTRG.22496	133	151	-19.95	cGTGTAGGCCTCACGttac	x|||||||x|:|x||xxxx	tCACATCCTGGG-GCtgga	--	endonuclease-reverse transcriptase [Babesia ovata]	-	-	-	-	GO:0031252//cell leading edge;GO:0070161//anchoring junction	GO:0003779//actin binding;GO:0050839//cell adhesion molecule binding	GO:0010468//regulation of gene expression;GO:0098602//single organism cell adhesion	--
miR-5119-z	MSTRG.31464	655	672	-24.89	gGTGTAGGTTCCGGTCct	x|||||||x:||x|x|xx	tCACATCCTGGGGCTGga	--	protein N-lysine methyltransferase METTL21A isoform X3 [Ovis aries]	Organismal Systems	Sensory system	ko04742//Taste transduction	K08474	GO:0005576//extracellular region;GO:0031224//intrinsic component of membrane;GO:0044424//intracellular part	GO:0005488//binding;GO:0060089//molecular transducer activity	GO:0001525//angiogenesis;GO:0007166//cell surface receptor signaling pathway;GO:0007606//sensory perception of chemical stimulus;GO:0040013//negative regulation of locomotion;GO:0048523//negative regulation of cellular process;GO:0051241//negative regulation of multicellular organismal process	--
miR-5119-z	MSTRG.4090	2720	2736	-19.34	tGTGTAGG-TACCGAgtc	x|||||||x:x||||xxx	tCACATCCTGGGGCTgga	--	PREDICTED: basic salivary proline-rich protein 1-like isoform X2 [Bos indicus]	-	-	-	-	GO:0031224//intrinsic component of membrane;GO:0044421//extracellular region part	GO:0043169//cation binding;GO:0060089//molecular transducer activity	GO:0007162//negative regulation of cell adhesion;GO:0007169//transmembrane receptor protein tyrosine kinase signaling pathway;GO:0007606//sensory perception of chemical stimulus;GO:0010596//negative regulation of endothelial cell migration;GO:0045765//regulation of angiogenesis;GO:0048869//cellular developmental process;GO:0050922//negative regulation of chemotaxis	--
miR-5119-z	MSTRG.4578	1530	1546	-19.66	aGTGTAGG-TATGGACtg	x|||||||x:x:x|||xx	tCACATCCTGGGGCTGga	--	reverse transcriptase-like [Bos taurus]	-	-	-	-	GO:0043231//intracellular membrane-bounded organelle	GO:0003723//RNA binding	GO:0006464//cellular protein modification process;GO:0015980//energy derivation by oxidation of organic compounds	--
miR-382-x	MSTRG.17502	673	693	-20.21	tTTCAACAGG-ACTTTCTAcct	x|||||||:|x||:x:|||xxx	gAAGTTGTTCGTGGTGGATtcg	C4A	PREDICTED: complement C4-B-like isoform X1 [Bison bison bison]	Human Diseases;Human Diseases;Organismal Systems;Human Diseases	Immune disease;Infectious disease: bacterial;Immune system;Infectious disease: bacterial	ko05322//Systemic lupus erythematosus;ko05150//Staphylococcus aureus infection;ko04610//Complement and coagulation cascades;ko05133//Pertussis	K03989;K03989;K03989;K03989	GO:0016020//membrane;GO:0031988//membrane-bounded vesicle;GO:0044217//other organism part	GO:0001846//opsonin binding;GO:0061135//endopeptidase regulator activity	GO:0002237//response to molecule of bacterial origin;GO:0002673//regulation of acute inflammatory response;GO:0006956//complement activation;GO:0010466//negative regulation of peptidase activity;GO:0019724//B cell mediated immunity;GO:0043277//apoptotic cell clearance	--
miR-382-x	MSTRG.21230	682	705	-17.9	tTTCAACAGTAGTAGGAGCTAccg	x|||||||xx||:|xx|x|||xxx	gAAGTTGT--TCGTGGTGGATtcg	NAP1L4	nucleosome assembly protein 1-like 4 isoform X2 [Erpetoichthys calabaricus]	-	-	-	-	GO:0043005//neuron projection;GO:0044297//cell body;GO:0044424//intracellular part	GO:0003723//RNA binding;GO:0005515//protein binding	GO:0034728//nucleosome organization	--
miR-382-x	MSTRG.27704	605	630	-23.65	cTTCAACAACGGCTCTACCATTAAat	x||||||||xx||x|:|||xx|||xx	gAAGTTGTT--CGTGGTGG--ATTcg	pol	PREDICTED: endogenous retrovirus group K member 19 Env polyprotein-like [Bison bison bison]	-	-	-	-	GO:0019012//virion;GO:0030131//clathrin adaptor complex;GO:0030135//coated vesicle;GO:0036464//cytoplasmic ribonucleoprotein granule	GO:0000175//3'-5'-exoribonuclease activity;GO:0008289//lipid binding;GO:0015631//tubulin binding;GO:0016740//transferase activity;GO:0043167//ion binding;GO:0044822//poly(A) RNA binding	GO:0001649//osteoblast differentiation;GO:0002237//response to molecule of bacterial origin;GO:0006259//DNA metabolic process;GO:0007009//plasma membrane organization;GO:0007623//circadian rhythm;GO:0022618//ribonucleoprotein complex assembly;GO:0043488//regulation of mRNA stability;GO:0045597//positive regulation of cell differentiation;GO:0045807//positive regulation of endocytosis;GO:0090501//…	--
miR-455-x	MSTRG.29222	6444	6466	-16.44	gTACACGGTACTCCCACGGTAcc	x|||||||x|x:|xx|x|x||xx	tATGTGCCTTTGGACTAC-ATcg	--	serine/arginine repetitive matrix protein 1-like [Zalophus californianus]	-	-	-	-	GO:0042579//microbody	GO:0005515//protein binding;GO:0016647//oxidoreductase activity, acting on the CH-NH group of donors, oxygen as acceptor	GO:0006596//polyamine biosynthetic process;GO:0006598//polyamine catabolic process;GO:0031328//positive regulation of cellular biosynthetic process;GO:0044710//single-organism metabolic process;GO:0051234//establishment of localization	--
miR-455-x	MSTRG.4090	11116	11138	-17.98	tTACACGGGTGACGAGAGGcgac	x|||||||:x:||xx||x|xxxx	tATGTGCCT-TTGGACTACatcg	--	PREDICTED: basic salivary proline-rich protein 1-like isoform X2 [Bos indicus]	-	-	-	-	GO:0031224//intrinsic component of membrane;GO:0044421//extracellular region part	GO:0043169//cation binding;GO:0060089//molecular transducer activity	GO:0007162//negative regulation of cell adhesion;GO:0007169//transmembrane receptor protein tyrosine kinase signaling pathway;GO:0007606//sensory perception of chemical stimulus;GO:0010596//negative regulation of endothelial cell migration;GO:0045765//regulation of angiogenesis;GO:0048869//cellular developmental process;GO:0050922//negative regulation of chemotaxis	--
miR-6412-z	MSTRG.15288	450	467	-13.06	tTGGTAGGtcccaagaaa	x|||||||xxxxxxxxxx	aACCATCCtctgctacca	ZFP30	LOW QUALITY PROTEIN: zinc finger protein 30 [Ovis aries]	Human Diseases	Infectious disease: viral	ko05168//Herpes simplex virus 1 infection	K09228	-	-	-	--
miR-6412-z	MSTRG.29222	4550	4567	-13.91	aTGGTAGGttcggagtca	x|||||||xxxxxxxxxx	aACCATCCtctgctacca	--	serine/arginine repetitive matrix protein 1-like [Zalophus californianus]	-	-	-	-	GO:0042579//microbody	GO:0005515//protein binding;GO:0016647//oxidoreductase activity, acting on the CH-NH group of donors, oxygen as acceptor	GO:0006596//polyamine biosynthetic process;GO:0006598//polyamine catabolic process;GO:0031328//positive regulation of cellular biosynthetic process;GO:0044710//single-organism metabolic process;GO:0051234//establishment of localization	--
miR-6412-z	MSTRG.32506	303	320	-18.32	gTGGTAGGGGGAGGTccg	x|||||||:|:x|:|xxx	aACCATCCTCTGCTAcca	--	probable inactive serine/threonine-protein kinase slob2 isoform X1 [Vicugna pacos]	-	-	-	-	-	-	-	--
miR-6412-z	MSTRG.4090	6412	6428	-15.6	cTGGTAGGAC-CGGTccg	x||||||||xx||:|xxx	aACCATCCTCTGCTAcca	--	PREDICTED: basic salivary proline-rich protein 1-like isoform X2 [Bos indicus]	-	-	-	-	GO:0031224//intrinsic component of membrane;GO:0044421//extracellular region part	GO:0043169//cation binding;GO:0060089//molecular transducer activity	GO:0007162//negative regulation of cell adhesion;GO:0007169//transmembrane receptor protein tyrosine kinase signaling pathway;GO:0007606//sensory perception of chemical stimulus;GO:0010596//negative regulation of endothelial cell migration;GO:0045765//regulation of angiogenesis;GO:0048869//cellular developmental process;GO:0050922//negative regulation of chemotaxis	--
miR-6412-z	MSTRG.7424	469	487	-20.39	gTGGTAGGGGACTGACGtc	x|||||||:|||x||x|xx	aACCATCCTCTG-CTACca	--	PREDICTED: gametogenetin-like [Capra hircus]	-	-	-	-	-	-	-	--
miR-424-y	MSTRG.5822	1442	1461	-18.44	gTTTTGCA-TCCCCGGTttac	x|||||||x|||x||::xxxx	cAAAACGTGAGGCGCTGctat	--	-	-	-	-	-	-	-	-	--
miR-345-y	MSTRG.18801	2414	2432	-14.47	cGACTTGA--CTGACACTTgc	x|||||||xx|:x|x||:|xx	cCTGAACTAGGGGTCTGGAgt	MKI67	PREDICTED: antigen KI-67 [Bos mutus]	-	-	-	-	GO:0005694//chromosome;GO:0043231//intracellular membrane-bounded organelle	GO:0003723//RNA binding;GO:0005515//protein binding;GO:0036094//small molecule binding	GO:0000280//nuclear division;GO:0009408//response to heat;GO:0010033//response to organic substance;GO:0031099//regeneration;GO:0044260//cellular macromolecule metabolic process;GO:0044763//single-organism cellular process;GO:1903510//mucopolysaccharide metabolic process	--
miR-345-y	MSTRG.29222	4252	4272	-25.63	gGACTTGAGACCTCGGTCagg	x|||||||xx||:x|::|xxx	cCTGAACTAGGGGTCTGGagt	--	serine/arginine repetitive matrix protein 1-like [Zalophus californianus]	-	-	-	-	GO:0042579//microbody	GO:0005515//protein binding;GO:0016647//oxidoreductase activity, acting on the CH-NH group of donors, oxygen as acceptor	GO:0006596//polyamine biosynthetic process;GO:0006598//polyamine catabolic process;GO:0031328//positive regulation of cellular biosynthetic process;GO:0044710//single-organism metabolic process;GO:0051234//establishment of localization	--
miR-345-y	MSTRG.6869	1379	1399	-13.8	gGACTTGAATTGTAatagttt	x|||||||x::x:|xxxxxxx	cCTGAACTAGGGGTctggagt	ABCC4	multidrug resistance-associated protein 4-like isoform X1 [Bos indicus x Bos taurus]	Environmental Information Processing;Organismal Systems;Environmental Information Processing;Human Diseases	Signal transduction;Digestive system;Membrane transport;Drug resistance: antineoplastic	ko04024//cAMP signaling pathway;ko04976//Bile secretion;ko02010//ABC transporters;ko01523//Antifolate resistance	K05673;K05673;K05673;K05673	GO:0030667//secretory granule membrane;GO:0031224//intrinsic component of membrane	GO:0015405//P-P-bond-hydrolysis-driven transmembrane transporter activity;GO:0016616//oxidoreductase activity, acting on the CH-OH group of donors, NAD or NADP as acceptor;GO:0016887//ATPase activity;GO:0032550//purine ribonucleoside binding	GO:0001775//cell activation;GO:0006811//ion transport;GO:0007599//hemostasis;GO:0008284//positive regulation of cell proliferation;GO:0009719//response to endogenous stimulus;GO:0010033//response to organic substance;GO:0015893//drug transport;GO:0044710//single-organism metabolic process	--
miR-345-y	MSTRG.7424	102	121	-21.26	aGACTTGAGGTCC-GACCctg	x|||||||xx:||x||||xxx	cCTGAACTAGGGGTCTGGagt	--	PREDICTED: gametogenetin-like [Capra hircus]	-	-	-	-	-	-	-	--
miR-205-x	MSTRG.18801	1171	1192	-10.58	cGGAAGTAcacccccgaaaccg	x|||||||xxxxxxxxxxxxxx	tCCTTCATtccaccggagtctg	MKI67	PREDICTED: antigen KI-67 [Bos mutus]	-	-	-	-	GO:0005694//chromosome;GO:0043231//intracellular membrane-bounded organelle	GO:0003723//RNA binding;GO:0005515//protein binding;GO:0036094//small molecule binding	GO:0000280//nuclear division;GO:0009408//response to heat;GO:0010033//response to organic substance;GO:0031099//regeneration;GO:0044260//cellular macromolecule metabolic process;GO:0044763//single-organism cellular process;GO:1903510//mucopolysaccharide metabolic process	--
miR-205-x	MSTRG.4090	10188	10209	-16.4	aGGAAGTAActctcaccggtct	x||||||||xxxxxxxxxxxxx	tCCTTCATTccaccggagtctg	--	PREDICTED: basic salivary proline-rich protein 1-like isoform X2 [Bos indicus]	-	-	-	-	GO:0031224//intrinsic component of membrane;GO:0044421//extracellular region part	GO:0043169//cation binding;GO:0060089//molecular transducer activity	GO:0007162//negative regulation of cell adhesion;GO:0007169//transmembrane receptor protein tyrosine kinase signaling pathway;GO:0007606//sensory perception of chemical stimulus;GO:0010596//negative regulation of endothelial cell migration;GO:0045765//regulation of angiogenesis;GO:0048869//cellular developmental process;GO:0050922//negative regulation of chemotaxis	--
miR-205-x	MSTRG.6530	56	74	-25.5	aGGAAGTAAGG--GTC-CAGgt	x||||||||||xx|:|x|||xx	tCCTTCATTCCACCGGAGTCtg	--	-	-	-	-	-	-	-	-	--
miR-9277-z	MSTRG.13725	367	383	-22.1	tAGGACGGC-GTTGAGct	x||||||||x|x||x|xx	aTCCTGCCGACTACGCca	--	serine/arginine repetitive matrix protein 2-like, partial [Bos taurus]	-	-	-	-	-	-	-	--
miR-9277-z	MSTRG.20070	641	658	-14.07	gAGGACGGTctttcagtt	x|||||||:xxxxxxxxx	aTCCTGCCGactacgcca	CCNG1	TPA: cyclin-G1-like [Bos taurus]	Human Diseases;Cellular Processes	Cancer: overview;Cell growth and death	ko05206//MicroRNAs in cancer;ko04115//p53 signaling pathway	K10145;K10145	GO:0043005//neuron projection;GO:0043231//intracellular membrane-bounded organelle;GO:0044297//cell body;GO:0044444//cytoplasmic part	GO:0005515//protein binding	GO:0000280//nuclear division;GO:0007417//central nervous system development;GO:0009719//response to endogenous stimulus;GO:0031572//G2 DNA damage checkpoint;GO:0040007//growth;GO:0042981//regulation of apoptotic process;GO:0048646//anatomical structure formation involved in morphogenesis;GO:0051726//regulation of cell cycle	--
miR-9277-z	MSTRG.22496	1600	1617	-18.02	gAGGACGGGGGTTaggga	x|||||||xx|x|xxxxx	aTCCTGCCGACTAcgcca	--	endonuclease-reverse transcriptase [Babesia ovata]	-	-	-	-	GO:0031252//cell leading edge;GO:0070161//anchoring junction	GO:0003779//actin binding;GO:0050839//cell adhesion molecule binding	GO:0010468//regulation of gene expression;GO:0098602//single organism cell adhesion	--
miR-9277-z	MSTRG.29222	7778	7795	-13.92	aAGGACGGacatctctga	x|||||||xxxxxxxxxx	aTCCTGCCgactacgcca	--	serine/arginine repetitive matrix protein 1-like [Zalophus californianus]	-	-	-	-	GO:0042579//microbody	GO:0005515//protein binding;GO:0016647//oxidoreductase activity, acting on the CH-NH group of donors, oxygen as acceptor	GO:0006596//polyamine biosynthetic process;GO:0006598//polyamine catabolic process;GO:0031328//positive regulation of cellular biosynthetic process;GO:0044710//single-organism metabolic process;GO:0051234//establishment of localization	--
miR-9277-z	MSTRG.4090	10615	10631	-24.7	gAGGACGGGTGGT-CGga	x|||||||x||:|x||xx	aTCCTGCCGACTACGCca	--	PREDICTED: basic salivary proline-rich protein 1-like isoform X2 [Bos indicus]	-	-	-	-	GO:0031224//intrinsic component of membrane;GO:0044421//extracellular region part	GO:0043169//cation binding;GO:0060089//molecular transducer activity	GO:0007162//negative regulation of cell adhesion;GO:0007169//transmembrane receptor protein tyrosine kinase signaling pathway;GO:0007606//sensory perception of chemical stimulus;GO:0010596//negative regulation of endothelial cell migration;GO:0045765//regulation of angiogenesis;GO:0048869//cellular developmental process;GO:0050922//negative regulation of chemotaxis	--
miR-9277-z	MSTRG.4578	394	411	-12.86	gAGGACGGAAGTTagaaa	x|||||||xx|x|xxxxx	aTCCTGCCGACTAcgcca	--	reverse transcriptase-like [Bos taurus]	-	-	-	-	GO:0043231//intracellular membrane-bounded organelle	GO:0003723//RNA binding	GO:0006464//cellular protein modification process;GO:0015980//energy derivation by oxidation of organic compounds	--
miR-9277-z	MSTRG.7424	953	972	-15.4	gAGGACGGACCCTATGgctt	x|||||||xx|xx|||xxxx	aTCCTGCC--GACTACgcca	--	PREDICTED: gametogenetin-like [Capra hircus]	-	-	-	-	-	-	-	--
miR-542-x	MSTRG.17500	898	923	-20.68	tGCCCCTACAGTAGGAGAAGTtagtc	x|||||||xx||||x|x|x||xxxxx	tCGGGGAT--CATCATGT-CAcgaga	C4B	complement C4 isoform X1 [Bos taurus]	Human Diseases;Human Diseases;Organismal Systems;Human Diseases	Immune disease;Infectious disease: bacterial;Immune system;Infectious disease: bacterial	ko05322//Systemic lupus erythematosus;ko05150//Staphylococcus aureus infection;ko04610//Complement and coagulation cascades;ko05133//Pertussis	K03989;K03989;K03989;K03989	GO:0016020//membrane;GO:0031988//membrane-bounded vesicle;GO:0044217//other organism part	GO:0001846//opsonin binding;GO:0061135//endopeptidase regulator activity	GO:0002237//response to molecule of bacterial origin;GO:0002673//regulation of acute inflammatory response;GO:0006956//complement activation;GO:0010466//negative regulation of peptidase activity;GO:0019724//B cell mediated immunity;GO:0043277//apoptotic cell clearance	--
miR-542-x	MSTRG.9563	1584	1606	-20.27	cGCCCCTACTTCTGCAGacggag	x|||||||x|xx|:|||xxxxxx	tCGGGGATCATCATGTCacgaga	AHNAK2	PREDICTED: protein AHNAK2 [Bos mutus]	Human Diseases	Infectious disease: bacterial	ko05132//Salmonella infection	K23934	GO:0012506//vesicle membrane;GO:0031674//I band;GO:0044459//plasma membrane part	-	GO:0007009//plasma membrane organization	--
miR-2779-z	MSTRG.13725	180	197	-18.03	aAAGGCCGTGGTgaagga	x|||||||x|x|xxxxxx	tTTCCGGCTCGAaggacc	--	serine/arginine repetitive matrix protein 2-like, partial [Bos taurus]	-	-	-	-	-	-	-	--
miR-2779-z	MSTRG.13727	333	350	-18.03	aAAGGCCGTGGTgaagga	x|||||||x|x|xxxxxx	tTTCCGGCTCGAaggacc	--	collagen alpha-1(II) chain-like [Bos taurus]	-	-	-	-	-	-	-	--
miR-2779-z	MSTRG.15104	513	530	-16.75	cAAGGCCGGcggatgaag	x|||||||:xxxxxxxxx	tTTCCGGCTcgaaggacc	--	PREDICTED: phospholipase A2 inhibitor and Ly6/PLAUR domain-containing protein [Bison bison bison]	-	-	-	-	-	-	-	--
miR-2779-z	MSTRG.1906	490	507	-19.18	gAAGGCCGGTCTTTGTtt	x|||||||:x|||:x|xx	tTTCCGGCTCGAAGGAcc	UQCRC2	cytochrome b-c1 complex subunit 2, mitochondrial [Bos taurus]	Metabolism;Human Diseases;Human Diseases;Organismal Systems;Human Diseases;Metabolism;Human Diseases;Organismal Systems	Global and overview maps;Neurodegenerative disease;Neurodegenerative disease;Environmental adaptation;Endocrine and metabolic disease;Energy metabolism;Neurodegenerative disease;Circulatory system	ko01100//Metabolic pathways;ko05010//Alzheimer disease;ko05016//Huntington disease;ko04714//Thermogenesis;ko04932//Non-alcoholic fatty liver disease;ko00190//Oxidative phosphorylation;ko05012//Parkinson disease;ko04260//Cardiac muscle contraction	K00415;K00415;K00415;K00415;K00415;K00415;K00415;K00415	GO:0019866//organelle inner membrane;GO:0031988//membrane-bounded vesicle;GO:0044455//mitochondrial membrane part	GO:0004175//endopeptidase activity;GO:0005515//protein binding;GO:0043169//cation binding	GO:0019538//protein metabolic process;GO:0022900//electron transport chain;GO:0045333//cellular respiration;GO:0051234//establishment of localization	--
miR-2779-z	MSTRG.25549	137	154	-19.97	cAAGGCCGTGGTCCCgga	x|||||||x|x|x||xxx	tTTCCGGCTCGAAGGacc	STAT2	signal transducer and activator of transcription 2 isoform 1 [Camelus ferus]	Human Diseases;Human Diseases;Human Diseases;Human Diseases;Human Diseases;Organismal Systems;Environmental Information Processing;Human Diseases;Organismal Systems;Human Diseases;Cellular Processes;Human Diseases;Human Diseases;Organismal Systems;Organismal Systems	Infectious disease: viral;Cancer: overview;Infectious disease: viral;Infectious disease: viral;Infectious disease: viral;Immune system;Signal transduction;Infectious disease: viral;Immune system;Infectious disease: viral;Cell growth and death;Infectious disease: viral;Infectious disease: viral;Development and regeneration;Immune system	ko05168//Herpes simplex virus 1 infection;ko05200//Pathways in cancer;ko05165//Human papillomavirus infection;ko05169//Epstein-Barr virus infection;ko05162//Measles;ko04062//Chemokine signaling pathway;ko04630//JAK-STAT signaling pathway;ko05167//Kaposi sarcoma-associated herpesvirus infection;ko04621//NOD-like receptor signaling pathway;ko05164//Influenza A;ko04217//Necroptosis;ko05161//Hepatiti…	K11221;K11221;K11221;K11221;K11221;K11221;K11221;K11221;K11221;K11221;K11221;K11221;K11221;K11221;K11221	GO:0016020//membrane;GO:0031981//nuclear lumen;GO:0044444//cytoplasmic part	GO:0001071//nucleic acid binding transcription factor activity;GO:0003677//DNA binding;GO:0005515//protein binding;GO:0060089//molecular transducer activity	GO:0001959//regulation of cytokine-mediated signaling pathway;GO:0002252//immune effector process;GO:0006355//regulation of transcription, DNA-templated;GO:0006366//transcription from RNA polymerase II promoter;GO:0009617//response to bacterium;GO:0010506//regulation of autophagy;GO:0035556//intracellular signal transduction;GO:0044403//symbiosis, encompassing mutualism through parasitism;GO:0044…	--
miR-2779-z	MSTRG.31308	271	288	-18.03	aAAGGCCGTGGTgaagga	x|||||||x|x|xxxxxx	tTTCCGGCTCGAaggacc	--	hornerin-like, partial [Bos taurus]	-	-	-	-	-	-	-	--
miR-421-y	MSTRG.1430	3042	3063	-14.54	tAGTTGTCT-TGTTTTACgtcat	x||||||||x|:x||x||xxxxx	aTCAACAGACATTAATTGggcgc	FBXO30	PREDICTED: F-box only protein 30 [Bison bison bison]	-	-	-	-	-	GO:0004721//phosphoprotein phosphatase activity;GO:0019787//ubiquitin-like protein transferase activity;GO:0030247//polysaccharide binding;GO:0046914//transition metal ion binding	GO:0006470//protein dephosphorylation;GO:0032446//protein modification by small protein conjugation	--
miR-421-y	MSTRG.15958	2360	2384	-14.59	aAGTTGTCCCGGAAACCAACCgaag	x|||||||xxx|x||xx||||xxxx	aTCAACAGA--CATTAATTGGgcgc	--	-	-	-	-	-	-	-	-	--
miR-421-y	MSTRG.16811	241	260	-20.17	tAGTTGTCGGGGG---ACCCaaa	x|||||||x|x::xxx||||xxx	aTCAACAGACATTAATTGGGcgc	--	TPR and ankyrin repeat-containing protein 1 isoform X3 [Bos taurus]	-	-	-	-	-	GO:0003824//catalytic activity	-	--
miR-421-y	MSTRG.5822	1310	1331	-17.81	gAGTTGTCCC-AAGAGACCCagt	x|||||||xxx||xx:||||xxx	aTCAACAGACATTAATTGGGcgc	--	-	-	-	-	-	-	-	-	--
miR-421-y	MSTRG.6892	1284	1304	-14.39	tAGTTGTCTCTGG--AACACtac	x||||||||x|::xx|||x|xxx	aTCAACAGACATTAATTGGGcgc	ABCC4	multidrug resistance-associated protein 4 [Bos taurus]	Environmental Information Processing;Organismal Systems;Environmental Information Processing;Human Diseases	Signal transduction;Digestive system;Membrane transport;Drug resistance: antineoplastic	ko04024//cAMP signaling pathway;ko04976//Bile secretion;ko02010//ABC transporters;ko01523//Antifolate resistance	K05673;K05673;K05673;K05673	GO:0030667//secretory granule membrane;GO:0031224//intrinsic component of membrane	GO:0015405//P-P-bond-hydrolysis-driven transmembrane transporter activity;GO:0016616//oxidoreductase activity, acting on the CH-OH group of donors, NAD or NADP as acceptor;GO:0017111//nucleoside-triphosphatase activity;GO:0032550//purine ribonucleoside binding	GO:0001775//cell activation;GO:0006821//chloride transport;GO:0007599//hemostasis;GO:0008284//positive regulation of cell proliferation;GO:0009719//response to endogenous stimulus;GO:0010033//response to organic substance;GO:0044710//single-organism metabolic process	--
miR-142-y	MSTRG.6892	988	1008	-12.5	cCATCACATTGAAC-ATATAag	x|||||||xx|x|xx|x|||xx	tGTAGTGTTTCCTACTTTATgg	ABCC4	multidrug resistance-associated protein 4 [Bos taurus]	Environmental Information Processing;Organismal Systems;Environmental Information Processing;Human Diseases	Signal transduction;Digestive system;Membrane transport;Drug resistance: antineoplastic	ko04024//cAMP signaling pathway;ko04976//Bile secretion;ko02010//ABC transporters;ko01523//Antifolate resistance	K05673;K05673;K05673;K05673	GO:0030667//secretory granule membrane;GO:0031224//intrinsic component of membrane	GO:0015405//P-P-bond-hydrolysis-driven transmembrane transporter activity;GO:0016616//oxidoreductase activity, acting on the CH-OH group of donors, NAD or NADP as acceptor;GO:0017111//nucleoside-triphosphatase activity;GO:0032550//purine ribonucleoside binding	GO:0001775//cell activation;GO:0006821//chloride transport;GO:0007599//hemostasis;GO:0008284//positive regulation of cell proliferation;GO:0009719//response to endogenous stimulus;GO:0010033//response to organic substance;GO:0044710//single-organism metabolic process	--
miR-203-y	MSTRG.20070	939	964	-16.37	aACTTTACATAGTCACTCTTGTGGct	x||||||||x|:||xxx||x|||:xx	gTGAAATGT-TTAG---GACCACTtg	CCNG1	TPA: cyclin-G1-like [Bos taurus]	Human Diseases;Cellular Processes	Cancer: overview;Cell growth and death	ko05206//MicroRNAs in cancer;ko04115//p53 signaling pathway	K10145;K10145	GO:0043005//neuron projection;GO:0043231//intracellular membrane-bounded organelle;GO:0044297//cell body;GO:0044444//cytoplasmic part	GO:0005515//protein binding	GO:0000280//nuclear division;GO:0007417//central nervous system development;GO:0009719//response to endogenous stimulus;GO:0031572//G2 DNA damage checkpoint;GO:0040007//growth;GO:0042981//regulation of apoptotic process;GO:0048646//anatomical structure formation involved in morphogenesis;GO:0051726//regulation of cell cycle	--
miR-203-y	MSTRG.31466	1077	1096	-11.66	tACTTTACA--TTTTGactcct	x||||||||xx|::||xxxxxx	gTGAAATGTTTAGGACcacttg	LONRF2	LOW QUALITY PROTEIN: LON peptidase N-terminal domain and RING finger protein 2 [Bos taurus]	-	-	-	-	-	GO:0046914//transition metal ion binding	GO:0019538//protein metabolic process	--
miR-203-y	MSTRG.6530	155	178	-17.53	tACTTTACGATTGTCCTCGTcggt	x|||||||:|xx:||||x||xxxx	gTGAAATGTT--TAGGACCActtg	--	-	-	-	-	-	-	-	-	--
miR-1249-y	MSTRG.1998	199	220	-18.73	gGCGGGAAGGcccccacgtccg	x|||||||||xxxxxxxxxxxx	aCGCCCTTCCcccccttcttca	DACT2	dapper homolog 2 [Bos indicus x Bos taurus]	-	-	-	-	GO:0043231//intracellular membrane-bounded organelle	GO:0019901//protein kinase binding	GO:0000904//cell morphogenesis involved in differentiation;GO:0007155//cell adhesion;GO:0032926//negative regulation of activin receptor signaling pathway;GO:0072044//collecting duct development	--
miR-1249-y	MSTRG.29222	372	393	-24.33	gGCGGGAAAGGGTCGAGGcgtc	x|||||||x|||xx||:|xxxx	aCGCCCTTCCCCCCCTTCttca	--	serine/arginine repetitive matrix protein 1-like [Zalophus californianus]	-	-	-	-	GO:0042579//microbody	GO:0005515//protein binding;GO:0016647//oxidoreductase activity, acting on the CH-NH group of donors, oxygen as acceptor	GO:0006596//polyamine biosynthetic process;GO:0006598//polyamine catabolic process;GO:0031328//positive regulation of cellular biosynthetic process;GO:0044710//single-organism metabolic process;GO:0051234//establishment of localization	--
miR-1249-y	MSTRG.31466	78	101	-18.4	aGCGGGAACAGGTGCGCAACAccg	x|||||||xx||x|x|x||x|xxx	aCGCCCTT--CCCCCCCTTCTtca	LONRF2	LOW QUALITY PROTEIN: LON peptidase N-terminal domain and RING finger protein 2 [Bos taurus]	-	-	-	-	-	GO:0046914//transition metal ion binding	GO:0019538//protein metabolic process	--
miR-200-y	MSTRG.18801	435	461	-19.46	gTTATGACGGAGGACGAGTGACTAaag	x||||||||||xxx|x|x|x||||xxx	tAATACTGCCT---GGTAA-TGATgat	MKI67	PREDICTED: antigen KI-67 [Bos mutus]	-	-	-	-	GO:0005694//chromosome;GO:0043231//intracellular membrane-bounded organelle	GO:0003723//RNA binding;GO:0005515//protein binding;GO:0036094//small molecule binding	GO:0000280//nuclear division;GO:0009408//response to heat;GO:0010033//response to organic substance;GO:0031099//regeneration;GO:0044260//cellular macromolecule metabolic process;GO:0044763//single-organism cellular process;GO:1903510//mucopolysaccharide metabolic process	--
miR-200-y	MSTRG.29222	5237	5261	-11.82	cTTATGACCTCACCCAACGGTACgg	x|||||||xxx|||x|xx:x|||xx	tAATACTGCC-TGG-TAATGATGat	--	serine/arginine repetitive matrix protein 1-like [Zalophus californianus]	-	-	-	-	GO:0042579//microbody	GO:0005515//protein binding;GO:0016647//oxidoreductase activity, acting on the CH-NH group of donors, oxygen as acceptor	GO:0006596//polyamine biosynthetic process;GO:0006598//polyamine catabolic process;GO:0031328//positive regulation of cellular biosynthetic process;GO:0044710//single-organism metabolic process;GO:0051234//establishment of localization	--
miR-339-z	MSTRG.1998	1383	1401	-19.21	gGGGACAGT---TCCCCGccga	x|||||||xxxx|||x||xxxx	tCCCTGTCCTCCAGGAGCtcat	DACT2	dapper homolog 2 [Bos indicus x Bos taurus]	-	-	-	-	GO:0043231//intracellular membrane-bounded organelle	GO:0019901//protein kinase binding	GO:0000904//cell morphogenesis involved in differentiation;GO:0007155//cell adhesion;GO:0032926//negative regulation of activin receptor signaling pathway;GO:0072044//collecting duct development	--
miR-339-z	MSTRG.22496	1692	1713	-29.26	aGGGACAGGTAGTGGTTGAGgg	x||||||||xx||xx|:|||xx	tCCCTGTCCTCCAGGAGCTCat	--	endonuclease-reverse transcriptase [Babesia ovata]	-	-	-	-	GO:0031252//cell leading edge;GO:0070161//anchoring junction	GO:0003779//actin binding;GO:0050839//cell adhesion molecule binding	GO:0010468//regulation of gene expression;GO:0098602//single organism cell adhesion	--
miR-339-z	MSTRG.29222	1536	1557	-20.94	cGGGACAGTGCGTACACGAGgc	x|||||||x:x||x|x||||xx	tCCCTGTCCTCCAGGAGCTCat	--	serine/arginine repetitive matrix protein 1-like [Zalophus californianus]	-	-	-	-	GO:0042579//microbody	GO:0005515//protein binding;GO:0016647//oxidoreductase activity, acting on the CH-NH group of donors, oxygen as acceptor	GO:0006596//polyamine biosynthetic process;GO:0006598//polyamine catabolic process;GO:0031328//positive regulation of cellular biosynthetic process;GO:0044710//single-organism metabolic process;GO:0051234//establishment of localization	--
miR-339-z	MSTRG.4090	12474	12495	-23.76	gGGGACAGGAACTACTGGTGgg	x|||||||||xx|x||x|x|xx	tCCCTGTCCTCCAGGAGCTCat	--	PREDICTED: basic salivary proline-rich protein 1-like isoform X2 [Bos indicus]	-	-	-	-	GO:0031224//intrinsic component of membrane;GO:0044421//extracellular region part	GO:0043169//cation binding;GO:0060089//molecular transducer activity	GO:0007162//negative regulation of cell adhesion;GO:0007169//transmembrane receptor protein tyrosine kinase signaling pathway;GO:0007606//sensory perception of chemical stimulus;GO:0010596//negative regulation of endothelial cell migration;GO:0045765//regulation of angiogenesis;GO:0048869//cellular developmental process;GO:0050922//negative regulation of chemotaxis	--
miR-339-z	MSTRG.4101	218	239	-28.41	aGGGACAGGGTCCCCTCTAGgg	x||||||||:xxx||||x||xx	tCCCTGTCCTCCAGGAGCTCat	--	-	-	-	-	-	-	-	-	--
miR-339-z	MSTRG.6690	948	973	-30.62	cGGGACAGAATAGAGGTCGTGGAGga	x|||||||xxxx||||||x|x|||xx	tCCCTGTC----CTCCAGGAGCTCat	--	uncharacterized protein LOC113906999 [Bos indicus x Bos taurus]	-	-	-	-	-	-	-	--
miR-6522-z	MSTRG.26854	171	193	-23.42	cGAGCCTTGTACAAGCGgcgcgg	x|||||||:x||||:|:xxxxxx	aCTCGGAAT-TGTTTGTgtacct	RGS12	regulator of G-protein signaling 12 isoform X3 [Cervus canadensis]	-	-	-	-	-	-	-	--
miR-6522-z	MSTRG.33557	420	441	-23.52	aGAGCCTTGACGATCGCtaaac	x|||||||:||:|x|:|xxxxx	aCTCGGAATTGTTTGTGtacct	ARHGAP6	rho GTPase-activating protein 6 isoform X2 [Bos indicus x Bos taurus]	-	-	-	-	GO:0015629//actin cytoskeleton;GO:0044444//cytoplasmic part	GO:0019899//enzyme binding;GO:0019904//protein domain specific binding;GO:0030674//protein binding, bridging;GO:0060229//lipase activator activity	GO:0001953//negative regulation of cell-matrix adhesion;GO:0007045//cell-substrate adherens junction assembly;GO:0008154//actin polymerization or depolymerization;GO:0010863//positive regulation of phospholipase C activity;GO:0032232//negative regulation of actin filament bundle assembly;GO:0043087//regulation of GTPase activity	--
miR-1-x	MSTRG.4090	17354	17377	-17.3	cGTATGAACGTGTGTACGTGTGta	x|||||||x|x:x:|||:||x|xx	aCATACTT-CTT-TATGTACCCat	--	PREDICTED: basic salivary proline-rich protein 1-like isoform X2 [Bos indicus]	-	-	-	-	GO:0031224//intrinsic component of membrane;GO:0044421//extracellular region part	GO:0043169//cation binding;GO:0060089//molecular transducer activity	GO:0007162//negative regulation of cell adhesion;GO:0007169//transmembrane receptor protein tyrosine kinase signaling pathway;GO:0007606//sensory perception of chemical stimulus;GO:0010596//negative regulation of endothelial cell migration;GO:0045765//regulation of angiogenesis;GO:0048869//cellular developmental process;GO:0050922//negative regulation of chemotaxis	--
miR-10182-y	MSTRG.15630	548	571	-26.63	aGCCGGGCCGGGTCGGGaggggac	x|||||||xx|x:||:|xxxxxxx	gCGGCCCG--CGGGCTCggatgct	--	protein N-lysine methyltransferase METTL21A isoform X3 [Ovis aries]	-	-	-	-	GO:0031224//intrinsic component of membrane;GO:0044421//extracellular region part	GO:0043169//cation binding;GO:0060089//molecular transducer activity	GO:0007162//negative regulation of cell adhesion;GO:0007169//transmembrane receptor protein tyrosine kinase signaling pathway;GO:0007606//sensory perception of chemical stimulus;GO:0010596//negative regulation of endothelial cell migration;GO:0045765//regulation of angiogenesis;GO:0048869//cellular developmental process;GO:0050922//negative regulation of chemotaxis	--
miR-10182-y	MSTRG.15669	673	692	-28.9	gGCCGGGC--CCGGGTGGACcg	x|||||||xx|||:|:xx||xx	gCGGCCCGCGGGCTCGGATGct	--	-	-	-	-	-	-	-	-	--
miR-10182-y	MSTRG.18801	67	89	-30.53	gGCCGGGCGCGGCGTCCCTGgct	x|||||||||xx||xx|||:xxx	gCGGCCCGCGG-GCTCGGATgct	MKI67	PREDICTED: antigen KI-67 [Bos mutus]	-	-	-	-	GO:0005694//chromosome;GO:0043231//intracellular membrane-bounded organelle	GO:0003723//RNA binding;GO:0005515//protein binding;GO:0036094//small molecule binding	GO:0000280//nuclear division;GO:0009408//response to heat;GO:0010033//response to organic substance;GO:0031099//regeneration;GO:0044260//cellular macromolecule metabolic process;GO:0044763//single-organism cellular process;GO:1903510//mucopolysaccharide metabolic process	--
miR-10182-y	MSTRG.26854	231	250	-28.96	gGCCGGGC--CGGGGCCcggtg	x|||||||xx|x|:|||xxxxx	gCGGCCCGCGGGCTCGGatgct	RGS12	regulator of G-protein signaling 12 isoform X3 [Cervus canadensis]	-	-	-	-	-	-	-	--
miR-10182-y	MSTRG.29222	2	26	-34.24	gGCCGGGCGGCGCCCCGGCTTAgcg	x||||||||xxx|||x:||:||xxx	gCGGCCCGC---GGGCTCGGATgct	--	serine/arginine repetitive matrix protein 1-like [Zalophus californianus]	-	-	-	-	GO:0042579//microbody	GO:0005515//protein binding;GO:0016647//oxidoreductase activity, acting on the CH-NH group of donors, oxygen as acceptor	GO:0006596//polyamine biosynthetic process;GO:0006598//polyamine catabolic process;GO:0031328//positive regulation of cellular biosynthetic process;GO:0044710//single-organism metabolic process;GO:0051234//establishment of localization	--
miR-10182-y	MSTRG.31466	462	480	-28.64	gGCCGGGC---CGAGCCccgtc	x|||||||xxx||||||xxxxx	gCGGCCCGCGGGCTCGGatgct	LONRF2	LOW QUALITY PROTEIN: LON peptidase N-terminal domain and RING finger protein 2 [Bos taurus]	-	-	-	-	-	GO:0046914//transition metal ion binding	GO:0019538//protein metabolic process	--
miR-10182-y	MSTRG.33557	891	914	-29.17	gGCCGGGCCGATCCTGGCTTCCgt	x|||||||x|x:||x:||:|x|xx	gCGGCCCG-C-GGGCTCGGATGct	ARHGAP6	rho GTPase-activating protein 6 isoform X2 [Bos indicus x Bos taurus]	-	-	-	-	GO:0015629//actin cytoskeleton;GO:0044444//cytoplasmic part	GO:0019899//enzyme binding;GO:0019904//protein domain specific binding;GO:0030674//protein binding, bridging;GO:0060229//lipase activator activity	GO:0001953//negative regulation of cell-matrix adhesion;GO:0007045//cell-substrate adherens junction assembly;GO:0008154//actin polymerization or depolymerization;GO:0010863//positive regulation of phospholipase C activity;GO:0032232//negative regulation of actin filament bundle assembly;GO:0043087//regulation of GTPase activity	--
miR-10182-y	MSTRG.4090	7738	7759	-25.52	tGCCGGGCCTACTAtgggtagg	x|||||||x:x|x|xxxxxxxx	gCGGCCCGCGGGCTcggatgct	--	PREDICTED: basic salivary proline-rich protein 1-like isoform X2 [Bos indicus]	-	-	-	-	GO:0031224//intrinsic component of membrane;GO:0044421//extracellular region part	GO:0043169//cation binding;GO:0060089//molecular transducer activity	GO:0007162//negative regulation of cell adhesion;GO:0007169//transmembrane receptor protein tyrosine kinase signaling pathway;GO:0007606//sensory perception of chemical stimulus;GO:0010596//negative regulation of endothelial cell migration;GO:0045765//regulation of angiogenesis;GO:0048869//cellular developmental process;GO:0050922//negative regulation of chemotaxis	--
bantam-y	MSTRG.15630	85	106	-10.85	tCTCTAGTtcagagaacgggtc	x|||||||xxxxxxxxxxxxxx	tGAGATCAttgtgaaagctaat	--	protein N-lysine methyltransferase METTL21A isoform X3 [Ovis aries]	-	-	-	-	GO:0031224//intrinsic component of membrane;GO:0044421//extracellular region part	GO:0043169//cation binding;GO:0060089//molecular transducer activity	GO:0007162//negative regulation of cell adhesion;GO:0007169//transmembrane receptor protein tyrosine kinase signaling pathway;GO:0007606//sensory perception of chemical stimulus;GO:0010596//negative regulation of endothelial cell migration;GO:0045765//regulation of angiogenesis;GO:0048869//cellular developmental process;GO:0050922//negative regulation of chemotaxis	--
bantam-y	MSTRG.18801	1612	1637	-17.58	aCTCTAGTAGCCTCCACCTTAGAgtc	x||||||||:|xxxx||x||x||xxx	tGAGATCATTG----TGAAAGCTaat	MKI67	PREDICTED: antigen KI-67 [Bos mutus]	-	-	-	-	GO:0005694//chromosome;GO:0043231//intracellular membrane-bounded organelle	GO:0003723//RNA binding;GO:0005515//protein binding;GO:0036094//small molecule binding	GO:0000280//nuclear division;GO:0009408//response to heat;GO:0010033//response to organic substance;GO:0031099//regeneration;GO:0044260//cellular macromolecule metabolic process;GO:0044763//single-organism cellular process;GO:1903510//mucopolysaccharide metabolic process	--
bantam-y	MSTRG.31464	844	864	-13.01	cCTCTAGTCAC-CTCTTTATtg	x|||||||x||x||x|:x||xx	tGAGATCATTGTGAAAGCTAat	--	protein N-lysine methyltransferase METTL21A isoform X3 [Ovis aries]	Organismal Systems	Sensory system	ko04742//Taste transduction	K08474	GO:0005576//extracellular region;GO:0031224//intrinsic component of membrane;GO:0044424//intracellular part	GO:0005488//binding;GO:0060089//molecular transducer activity	GO:0001525//angiogenesis;GO:0007166//cell surface receptor signaling pathway;GO:0007606//sensory perception of chemical stimulus;GO:0040013//negative regulation of locomotion;GO:0048523//negative regulation of cellular process;GO:0051241//negative regulation of multicellular organismal process	--
bantam-y	MSTRG.31466	1775	1796	-16.7	aCTCTAGTAcgggtcacaccgg	x||||||||xxxxxxxxxxxxx	tGAGATCATtgtgaaagctaat	LONRF2	LOW QUALITY PROTEIN: LON peptidase N-terminal domain and RING finger protein 2 [Bos taurus]	-	-	-	-	-	GO:0046914//transition metal ion binding	GO:0019538//protein metabolic process	--
bantam-y	MSTRG.4090	1407	1428	-15.77	aCTCTAGTttctacgacgggag	x|||||||xxxxxxxxxxxxxx	tGAGATCAttgtgaaagctaat	--	PREDICTED: basic salivary proline-rich protein 1-like isoform X2 [Bos indicus]	-	-	-	-	GO:0031224//intrinsic component of membrane;GO:0044421//extracellular region part	GO:0043169//cation binding;GO:0060089//molecular transducer activity	GO:0007162//negative regulation of cell adhesion;GO:0007169//transmembrane receptor protein tyrosine kinase signaling pathway;GO:0007606//sensory perception of chemical stimulus;GO:0010596//negative regulation of endothelial cell migration;GO:0045765//regulation of angiogenesis;GO:0048869//cellular developmental process;GO:0050922//negative regulation of chemotaxis	--
miR-10926-z	MSTRG.14602	560	577	-22.21	cAGGGTCGCTACTGTGtt	x||||||||:||x|x|xx	aTCCCAGCGGTGCCTCca	ZNF671	zinc finger protein 28 homolog [Zalophus californianus]	Human Diseases	Infectious disease: viral	ko05168//Herpes simplex virus 1 infection	K09228	-	-	-	--
miR-10926-z	MSTRG.15669	468	487	-18.93	cAGGGTCGACCGTTTGAGca	x|||||||x||::xx|||xx	aTCCCAGC-GGTGC-CTCca	--	-	-	-	-	-	-	-	-	--
miR-10926-z	MSTRG.21179	725	742	-20.56	gAGGGTCGCCcagtcaca	x|||||||||xxxxxxxx	aTCCCAGCGGtgcctcca	--	LOW QUALITY PROTEIN: collagen alpha-1(IV) chain-like [Phocoena sinus]	-	-	-	-	-	-	-	--
miR-10926-z	MSTRG.22496	1584	1601	-15.15	gAGGGTCGTagtcccaga	x|||||||:xxxxxxxxx	aTCCCAGCGgtgcctcca	--	endonuclease-reverse transcriptase [Babesia ovata]	-	-	-	-	GO:0031252//cell leading edge;GO:0070161//anchoring junction	GO:0003779//actin binding;GO:0050839//cell adhesion molecule binding	GO:0010468//regulation of gene expression;GO:0098602//single organism cell adhesion	--
miR-10926-z	MSTRG.29222	1162	1178	-23.46	cAGGGTCGA-AGGGGGag	x|||||||xx|x||:|xx	aTCCCAGCGGTGCCTCca	--	serine/arginine repetitive matrix protein 1-like [Zalophus californianus]	-	-	-	-	GO:0042579//microbody	GO:0005515//protein binding;GO:0016647//oxidoreductase activity, acting on the CH-NH group of donors, oxygen as acceptor	GO:0006596//polyamine biosynthetic process;GO:0006598//polyamine catabolic process;GO:0031328//positive regulation of cellular biosynthetic process;GO:0044710//single-organism metabolic process;GO:0051234//establishment of localization	--
miR-10926-z	MSTRG.32506	1186	1203	-20.84	aAGGGTCGGTAGGGAaag	x|||||||x:|x|||xxx	aTCCCAGCGGTGCCTcca	--	probable inactive serine/threonine-protein kinase slob2 isoform X1 [Vicugna pacos]	-	-	-	-	-	-	-	--
miR-10926-z	MSTRG.33557	108	125	-16.48	aAGGGTCGACTCCGtcct	x|||||||x|x|x|xxxx	aTCCCAGCGGTGCCtcca	ARHGAP6	rho GTPase-activating protein 6 isoform X2 [Bos indicus x Bos taurus]	-	-	-	-	GO:0015629//actin cytoskeleton;GO:0044444//cytoplasmic part	GO:0019899//enzyme binding;GO:0019904//protein domain specific binding;GO:0030674//protein binding, bridging;GO:0060229//lipase activator activity	GO:0001953//negative regulation of cell-matrix adhesion;GO:0007045//cell-substrate adherens junction assembly;GO:0008154//actin polymerization or depolymerization;GO:0010863//positive regulation of phospholipase C activity;GO:0032232//negative regulation of actin filament bundle assembly;GO:0043087//regulation of GTPase activity	--
miR-10926-z	MSTRG.4090	18367	18384	-23.4	tAGGGTCGGAGGGGAGaa	x|||||||xx:x||||xx	aTCCCAGCGGTGCCTCca	--	PREDICTED: basic salivary proline-rich protein 1-like isoform X2 [Bos indicus]	-	-	-	-	GO:0031224//intrinsic component of membrane;GO:0044421//extracellular region part	GO:0043169//cation binding;GO:0060089//molecular transducer activity	GO:0007162//negative regulation of cell adhesion;GO:0007169//transmembrane receptor protein tyrosine kinase signaling pathway;GO:0007606//sensory perception of chemical stimulus;GO:0010596//negative regulation of endothelial cell migration;GO:0045765//regulation of angiogenesis;GO:0048869//cellular developmental process;GO:0050922//negative regulation of chemotaxis	--
miR-10926-z	MSTRG.6482	238	255	-13.74	aAGGGTCGaagtcccaga	x|||||||xxxxxxxxxx	aTCCCAGCggtgcctcca	--	Collagen alpha-1(XXI) chain [Varanus komodoensis]	-	-	-	-	GO:0016020//membrane	-	-	--
miR-10926-z	MSTRG.7424	198	215	-15.54	gAGGGTCGaggcctcccc	x|||||||xxxxxxxxxx	aTCCCAGCggtgcctcca	--	PREDICTED: gametogenetin-like [Capra hircus]	-	-	-	-	-	-	-	--
miR-5100-z	MSTRG.6690	398	419	-23.52	gGCTTAGGGTACTGTCGGctgt	x|||||||||xx:xx|||xxxx	tCGAATCCCAGCGGTGCCtcca	--	uncharacterized protein LOC113906999 [Bos indicus x Bos taurus]	-	-	-	-	-	-	-	--
miR-6123-z	MSTRG.1213	2810	2832	-20.15	aCGGTTCGA-TGCACAGGTgagga	x|||||||xx||||x||x|xxxxx	tGCCAAGCCCACGT-TCAAaggct	--	-	-	-	-	-	-	-	-	--
miR-6123-z	MSTRG.21507	728	751	-24.05	tCGGTTCGGGACCGGTGACTCCtt	x|||||||||xx|::x|xx|||xx	tGCCAAGCCCACGTT-CAAAGGct	Slc29a2	equilibrative nucleoside transporter 2 isoform X2 [Bos taurus]	Human Diseases	Substance dependence	ko05034//Alcoholism	K15014	GO:0016021//integral component of membrane;GO:0031090//organelle membrane;GO:0043231//intracellular membrane-bounded organelle;GO:0043232//intracellular non-membrane-bounded organelle	GO:0015932//nucleobase-containing compound transmembrane transporter activity	GO:0006725//cellular aromatic compound metabolic process;GO:0006863//purine nucleobase transport;GO:0007589//body fluid secretion;GO:0015855//pyrimidine nucleobase transport;GO:0015864//pyrimidine nucleoside transport;GO:0032868//response to insulin;GO:0044763//single-organism cellular process	--
miR-6123-z	MSTRG.28465	327	349	-18.85	tCGGTTCGGTTaggacacgaaag	x||||||||x|xxxxxxxxxxxx	tGCCAAGCCCAcgttcaaaggct	--	Barrier-to-autointegration factor [Varanus komodoensis]	Human Diseases	Infectious disease: viral	ko05168//Herpes simplex virus 1 infection	K09228	GO:0031224//intrinsic component of membrane;GO:0042579//microbody	GO:0005515//protein binding;GO:0016647//oxidoreductase activity, acting on the CH-NH group of donors, oxygen as acceptor;GO:0043168//anion binding	GO:0006596//polyamine biosynthetic process;GO:0006598//polyamine catabolic process;GO:0031328//positive regulation of cellular biosynthetic process;GO:0044710//single-organism metabolic process	--
miR-6123-z	MSTRG.3598	98	120	-17.83	gCGGTTCGtcctctgggcggccc	x|||||||xxxxxxxxxxxxxxx	tGCCAAGCccacgttcaaaggct	OPTN	PREDICTED: optineurin isoform X2 [Bos mutus]	Cellular Processes	Transport and catabolism	ko04137//Mitophagy - animal	K19946	-	-	-	--
miR-6123-z	MSTRG.4478	4641	4665	-18.35	cCGGTTCGTCTCGGGACTCTTCCat	x|||||||xx|x|x:|x|x||||xx	tGCCAAGCCCA-CGTTCA-AAGGct	F52C9.6	endonuclease-reverse transcriptase [Babesia ovata]	-	-	-	-	-	-	-	--
miR-6123-z	MSTRG.7032	208	231	-28.03	tCGGTTCGGGTGGGTCGGTTCacg	x|||||||||||x:xx|x|||xxx	tGCCAAGCCCACGTT-CAAAGgct	--	arf-GAP with dual PH domain-containing protein 2 isoform X1 [Cervus canadensis]	-	-	-	-	-	GO:0016647//oxidoreductase activity, acting on the CH-NH group of donors, oxygen as acceptor	GO:0006598//polyamine catabolic process;GO:0010467//gene expression;GO:0044238//primary metabolic process;GO:0044271//cellular nitrogen compound biosynthetic process;GO:1901576//organic substance biosynthetic process	--
miR-6123-z	MSTRG.9567	36	58	-25.21	cCGGTTCGGGTTCCAGTccgccc	x||||||||||x|x|||xxxxxx	tGCCAAGCCCACGTTCAaaggct	AHNAK2	protein AHNAK2 isoform X1 [Bos indicus x Bos taurus]	Human Diseases	Infectious disease: bacterial	ko05132//Salmonella infection	K23934	GO:0012506//vesicle membrane;GO:0031674//I band;GO:0044459//plasma membrane part	-	GO:0007009//plasma membrane organization	--
miR-6123-z	MSTRG.9896	541	563	-18.45	cCGGTTCGCG-GCGACGTcggcgg	x|||||||x|x||:|x||xxxxxx	tGCCAAGCCCACGTT-CAaaggct	--	IQ motif and ankyrin repeat domain-containing protein 1 isoform X4 [Cervus canadensis]	-	-	-	-	-	-	-	--
miR-184-y	MSTRG.15958	589	609	-25.69	tCCTGCCTCGA-ACAATTCCga	x||||||||xxx||x|||||xx	tGGACGGAGAACTGATAAGGgt	--	-	-	-	-	-	-	-	-	--
miR-184-y	MSTRG.9563	3108	3129	-21.19	aCCTGCCTACGGATccggtgga	x|||||||xxx||:xxxxxxxx	tGGACGGAGAACTGataagggt	AHNAK2	PREDICTED: protein AHNAK2 [Bos mutus]	Human Diseases	Infectious disease: bacterial	ko05132//Salmonella infection	K23934	GO:0012506//vesicle membrane;GO:0031674//I band;GO:0044459//plasma membrane part	-	GO:0007009//plasma membrane organization	--
miR-184-y	MSTRG.9567	184	206	-20.85	cCCTGCCTACTCGAgcccggggc	x|||||||x||x||xxxxxxxxx	tGGACGGA-GAACTgataagggt	AHNAK2	protein AHNAK2 isoform X1 [Bos indicus x Bos taurus]	Human Diseases	Infectious disease: bacterial	ko05132//Salmonella infection	K23934	GO:0012506//vesicle membrane;GO:0031674//I band;GO:0044459//plasma membrane part	-	GO:0007009//plasma membrane organization	--
miR-2419-y	MSTRG.10777	205	224	-21.1	aTGTCCGCTAA-GAA-ATGgca	x|||||||:x|x||xx|||xxx	aACAGGCGGGTGCTGATACgat	--	GRAM domain-containing protein 2B isoform X2 [Bos taurus]	Cellular Processes	Transport and catabolism	ko04146//Peroxisome	K00308	GO:0005737//cytoplasm;GO:0043231//intracellular membrane-bounded organelle	GO:0005515//protein binding;GO:0016647//oxidoreductase activity, acting on the CH-NH group of donors, oxygen as acceptor	GO:0006596//polyamine biosynthetic process;GO:0006598//polyamine catabolic process;GO:0009653//anatomical structure morphogenesis;GO:0016043//cellular component organization;GO:0031325//positive regulation of cellular metabolic process;GO:0031326//regulation of cellular biosynthetic process;GO:0044763//single-organism cellular process;GO:0048523//negative regulation of cellular process;GO:0048731…	--
miR-2419-y	MSTRG.15958	1523	1543	-17.52	cTGTCCGCC-ACtttctcgttc	x||||||||x||xxxxxxxxxx	aACAGGCGGGTGctgatacgat	--	-	-	-	-	-	-	-	-	--
miR-2419-y	MSTRG.9567	208	230	-21.35	cTGTCCGCTCCTCGGgacaccgg	x|||||||x||x||:xxxxxxxx	aACAGGCG-GGTGCTgatacgat	AHNAK2	protein AHNAK2 isoform X1 [Bos indicus x Bos taurus]	Human Diseases	Infectious disease: bacterial	ko05132//Salmonella infection	K23934	GO:0012506//vesicle membrane;GO:0031674//I band;GO:0044459//plasma membrane part	-	GO:0007009//plasma membrane organization	--
miR-504-x	MSTRG.14602	1206	1225	-19.43	aCTGGGACCTCGTTGTAAgg	x||||||||xx|x:||x|xx	aGACCCTGGT-CTGCACTct	ZNF671	zinc finger protein 28 homolog [Zalophus californianus]	Human Diseases	Infectious disease: viral	ko05168//Herpes simplex virus 1 infection	K09228	-	-	-	--
miR-504-x	MSTRG.31466	986	1003	-21.57	cCTGGGACC-GACaagtat	x||||||||x|||xxxxxx	aGACCCTGGTCTGcactct	LONRF2	LOW QUALITY PROTEIN: LON peptidase N-terminal domain and RING finger protein 2 [Bos taurus]	-	-	-	-	-	GO:0046914//transition metal ion binding	GO:0019538//protein metabolic process	--
miR-504-x	MSTRG.4090	1758	1778	-22.34	gCTGGGACCCGAGACCTGGta	x||||||||xx||||x||:xx	aGACCCTGG--TCTGCACTct	--	PREDICTED: basic salivary proline-rich protein 1-like isoform X2 [Bos indicus]	-	-	-	-	GO:0031224//intrinsic component of membrane;GO:0044421//extracellular region part	GO:0043169//cation binding;GO:0060089//molecular transducer activity	GO:0007162//negative regulation of cell adhesion;GO:0007169//transmembrane receptor protein tyrosine kinase signaling pathway;GO:0007606//sensory perception of chemical stimulus;GO:0010596//negative regulation of endothelial cell migration;GO:0045765//regulation of angiogenesis;GO:0048869//cellular developmental process;GO:0050922//negative regulation of chemotaxis	--
miR-504-x	MSTRG.6530	462	481	-21.29	tCTGGGACGAGAATGTccag	x|||||||x|||x:||xxxx	aGACCCTGGTCT-GCActct	--	-	-	-	-	-	-	-	-	--
miR-504-x	MSTRG.9421	1440	1458	-15.7	cCTGGGACTTTATTTTAga	x|||||||:xx|:x|x|xx	aGACCCTGGTCTGCACTct	--	thymocyte nuclear protein 1 isoform X2 [Odocoileus virginianus texanus]	-	-	-	-	-	-	-	--
miR-450-y	MSTRG.17500	1483	1503	-16.36	aTAACCCTAGTCTCAACGgtc	x|||||||x||xxx||||xxx	tATTGGGAACATT-TTGCatc	C4B	complement C4 isoform X1 [Bos taurus]	Human Diseases;Human Diseases;Organismal Systems;Human Diseases	Immune disease;Infectious disease: bacterial;Immune system;Infectious disease: bacterial	ko05322//Systemic lupus erythematosus;ko05150//Staphylococcus aureus infection;ko04610//Complement and coagulation cascades;ko05133//Pertussis	K03989;K03989;K03989;K03989	GO:0016020//membrane;GO:0031988//membrane-bounded vesicle;GO:0044217//other organism part	GO:0001846//opsonin binding;GO:0061135//endopeptidase regulator activity	GO:0002237//response to molecule of bacterial origin;GO:0002673//regulation of acute inflammatory response;GO:0006956//complement activation;GO:0010466//negative regulation of peptidase activity;GO:0019724//B cell mediated immunity;GO:0043277//apoptotic cell clearance	--
miR-450-y	MSTRG.29153	307	326	-10.35	gTAACCCTcaaccttattcc	x|||||||xxxxxxxxxxxx	tATTGGGAacattttgcatc	ZNF564	zinc finger protein 709-like isoform X1 [Cervus canadensis]	Human Diseases	Infectious disease: viral	ko05168//Herpes simplex virus 1 infection	K09228	-	GO:0005488//binding	-	--
miR-541-x	MSTRG.15080	701	723	-17.26	gTTCCTAA-ACGA-GGTCActtcgg	x|||||||x||||x:|:||xxxxxx	aAAGGATTCTGCTGTCGGTcccact	--	PREDICTED: immunoglobulin superfamily member 23 [Bos mutus]	-	-	-	-	-	-	-	--
miR-541-x	MSTRG.15958	2608	2632	-11.32	tTTCCTAATTTTTCCGTCGttacaa	x|||||||xx:xx|x|:|:xxxxxx	aAAGGATTCTGCTGTCGGTcccact	--	-	-	-	-	-	-	-	-	--
miR-541-x	MSTRG.18722	570	593	-12.05	aTTCCTAAAGTTGTA-TCAGtattg	x|||||||x::x::|x:|||xxxxx	aAAGGATTCTGCTGTCGGTCccact	DMBT1	PREDICTED: deleted in malignant brain tumors 1 protein isoform X6 [Bison bison bison]	Organismal Systems	Digestive system	ko04970//Salivary secretion	K13912	GO:0030666//endocytic vesicle membrane;GO:0030667//secretory granule membrane;GO:0031012//extracellular matrix;GO:0044421//extracellular region part;GO:0044425//membrane part	GO:0019899//enzyme binding;GO:0038023//signaling receptor activity;GO:0038024//cargo receptor activity	GO:0001701//in utero embryonic development;GO:0002758//innate immune response-activating signal transduction;GO:0006897//endocytosis;GO:0008283//cell proliferation;GO:0019731//antibacterial humoral response;GO:0030856//regulation of epithelial cell differentiation	--
miR-7550-z	MSTRG.21179	103	118	-22.16	gAGGCCGAG--TCCGGac	x||||||||xx|||x|xx	aTCCGGCTCGAAGGACca	--	LOW QUALITY PROTEIN: collagen alpha-1(IV) chain-like [Phocoena sinus]	-	-	-	-	-	-	-	--
miR-7550-z	MSTRG.29222	1215	1232	-21.54	gAGGCCGAGCccgaccgt	x|||||||||xxxxxxxx	aTCCGGCTCGaaggacca	--	serine/arginine repetitive matrix protein 1-like [Zalophus californianus]	-	-	-	-	GO:0042579//microbody	GO:0005515//protein binding;GO:0016647//oxidoreductase activity, acting on the CH-NH group of donors, oxygen as acceptor	GO:0006596//polyamine biosynthetic process;GO:0006598//polyamine catabolic process;GO:0031328//positive regulation of cellular biosynthetic process;GO:0044710//single-organism metabolic process;GO:0051234//establishment of localization	--
miR-7550-z	MSTRG.4090	15186	15202	-15.33	cAGGCCGA-CTagacccg	x|||||||x||xxxxxxx	aTCCGGCTCGAaggacca	--	PREDICTED: basic salivary proline-rich protein 1-like isoform X2 [Bos indicus]	-	-	-	-	GO:0031224//intrinsic component of membrane;GO:0044421//extracellular region part	GO:0043169//cation binding;GO:0060089//molecular transducer activity	GO:0007162//negative regulation of cell adhesion;GO:0007169//transmembrane receptor protein tyrosine kinase signaling pathway;GO:0007606//sensory perception of chemical stimulus;GO:0010596//negative regulation of endothelial cell migration;GO:0045765//regulation of angiogenesis;GO:0048869//cellular developmental process;GO:0050922//negative regulation of chemotaxis	--
miR-301-y	MSTRG.10777	406	428	-20.08	cTCACGTTGTTGATGCGGgatct	x|||||||:|::xx:|:|xxxxx	cAGTGCAATAGTATTGTCaaagc	--	GRAM domain-containing protein 2B isoform X2 [Bos taurus]	Cellular Processes	Transport and catabolism	ko04146//Peroxisome	K00308	GO:0005737//cytoplasm;GO:0043231//intracellular membrane-bounded organelle	GO:0005515//protein binding;GO:0016647//oxidoreductase activity, acting on the CH-NH group of donors, oxygen as acceptor	GO:0006596//polyamine biosynthetic process;GO:0006598//polyamine catabolic process;GO:0009653//anatomical structure morphogenesis;GO:0016043//cellular component organization;GO:0031325//positive regulation of cellular metabolic process;GO:0031326//regulation of cellular biosynthetic process;GO:0044763//single-organism cellular process;GO:0048523//negative regulation of cellular process;GO:0048731…	--
miR-301-y	MSTRG.1213	873	894	-18.96	gTCACGTTCGTTGT--CGGTcccg	x|||||||x:|::|xx|:||xxxx	cAGTGCAA-TAGTATTGTCAaagc	--	-	-	-	-	-	-	-	-	--
miR-301-y	MSTRG.22162	935	956	-12.82	aTCACGTTC-CGTCTCGGGTccg	x|||||||xx|:|xx|:|x|xxx	cAGTGCAATAGTATTGTCAAagc	--	translation initiation factor IF-2-like [Cervus canadensis]	-	-	-	-	-	-	-	--
miR-301-y	MSTRG.4478	2586	2608	-11.1	cTCACGTTAACACGTCAtcaaac	x||||||||x||x:x||xxxxxx	cAGTGCAATAGTATTGTcaaagc	F52C9.6	endonuclease-reverse transcriptase [Babesia ovata]	-	-	-	-	-	-	-	--
miR-301-y	MSTRG.6892	1136	1158	-13.36	cTCACGTTcggtggtcaggacgt	x|||||||xxxxxxxxxxxxxxx	cAGTGCAAtagtattgtcaaagc	ABCC4	multidrug resistance-associated protein 4 [Bos taurus]	Environmental Information Processing;Organismal Systems;Environmental Information Processing;Human Diseases	Signal transduction;Digestive system;Membrane transport;Drug resistance: antineoplastic	ko04024//cAMP signaling pathway;ko04976//Bile secretion;ko02010//ABC transporters;ko01523//Antifolate resistance	K05673;K05673;K05673;K05673	GO:0030667//secretory granule membrane;GO:0031224//intrinsic component of membrane	GO:0015405//P-P-bond-hydrolysis-driven transmembrane transporter activity;GO:0016616//oxidoreductase activity, acting on the CH-OH group of donors, NAD or NADP as acceptor;GO:0017111//nucleoside-triphosphatase activity;GO:0032550//purine ribonucleoside binding	GO:0001775//cell activation;GO:0006821//chloride transport;GO:0007599//hemostasis;GO:0008284//positive regulation of cell proliferation;GO:0009719//response to endogenous stimulus;GO:0010033//response to organic substance;GO:0044710//single-organism metabolic process	--
miR-301-y	MSTRG.7126	34	55	-15.29	aTCACGTT-TGAGAGCAGgacgt	x|||||||x|x|x|:|||xxxxx	cAGTGCAATAGTATTGTCaaagc	Mycbp2	PREDICTED: E3 ubiquitin-protein ligase MYCBP2 isoform X1 [Equus przewalskii]	Organismal Systems	Development and regeneration	ko04361//Axon regeneration	K10693	GO:0005856//cytoskeleton;GO:0043005//neuron projection;GO:0043231//intracellular membrane-bounded organelle	GO:0003824//catalytic activity;GO:0046914//transition metal ion binding;GO:0046983//protein dimerization activity	GO:0008045//motor neuron axon guidance;GO:0008104//protein localization;GO:0009895//negative regulation of catabolic process;GO:0010468//regulation of gene expression;GO:0021955//central nervous system neuron axonogenesis;GO:0032446//protein modification by small protein conjugation;GO:0033043//regulation of organelle organization;GO:0034645//cellular macromolecule biosynthetic process	--
miR-190-x	MSTRG.17502	687	711	-17.38	aCTATACAGATCCTAGTGTTTCAac	x|||||||:|xx|||x|:x::||xx	tGATATGTTT--GAT-ATTGGGTtg	C4A	PREDICTED: complement C4-B-like isoform X1 [Bison bison bison]	Human Diseases;Human Diseases;Organismal Systems;Human Diseases	Immune disease;Infectious disease: bacterial;Immune system;Infectious disease: bacterial	ko05322//Systemic lupus erythematosus;ko05150//Staphylococcus aureus infection;ko04610//Complement and coagulation cascades;ko05133//Pertussis	K03989;K03989;K03989;K03989	GO:0016020//membrane;GO:0031988//membrane-bounded vesicle;GO:0044217//other organism part	GO:0001846//opsonin binding;GO:0061135//endopeptidase regulator activity	GO:0002237//response to molecule of bacterial origin;GO:0002673//regulation of acute inflammatory response;GO:0006956//complement activation;GO:0010466//negative regulation of peptidase activity;GO:0019724//B cell mediated immunity;GO:0043277//apoptotic cell clearance	--
miR-190-x	MSTRG.27704	222	244	-17.14	aCTATACAGACAAGTTACTAAag	x|||||||:||x|x|x||:x|xx	tGATATGTTTGAT-ATTGGGTtg	pol	PREDICTED: endogenous retrovirus group K member 19 Env polyprotein-like [Bison bison bison]	-	-	-	-	GO:0019012//virion;GO:0030131//clathrin adaptor complex;GO:0030135//coated vesicle;GO:0036464//cytoplasmic ribonucleoprotein granule	GO:0000175//3'-5'-exoribonuclease activity;GO:0008289//lipid binding;GO:0015631//tubulin binding;GO:0016740//transferase activity;GO:0043167//ion binding;GO:0044822//poly(A) RNA binding	GO:0001649//osteoblast differentiation;GO:0002237//response to molecule of bacterial origin;GO:0006259//DNA metabolic process;GO:0007009//plasma membrane organization;GO:0007623//circadian rhythm;GO:0022618//ribonucleoprotein complex assembly;GO:0043488//regulation of mRNA stability;GO:0045597//positive regulation of cell differentiation;GO:0045807//positive regulation of endocytosis;GO:0090501//…	--
miR-190-x	MSTRG.3753	1117	1137	-15.76	cCTATACAGG-TGTAATCTtaa	x|||||||::x|:|||:|:xxx	tGATATGTTTGATATTGGGttg	WAC	WW domain-containing adapter protein with coiled-coil isoform X2 [Bos taurus]	-	-	-	-	GO:0016604//nuclear body;GO:0030529//intracellular ribonucleoprotein complex	GO:0001099//basal RNA polymerase II transcription machinery binding	GO:0000077//DNA damage checkpoint;GO:0006355//regulation of transcription, DNA-templated;GO:0006513//protein monoubiquitination;GO:0010508//positive regulation of autophagy;GO:0031330//negative regulation of cellular catabolic process;GO:0033523//histone H2B ubiquitination	--
miR-141-y	MSTRG.13725	514	537	-19.3	cTTGTGACCGAAGACCTGTGTTcg	x|||||||xxx|||||xx||:|xx	tAACACTG---TCTGGTAACGAtg	--	serine/arginine repetitive matrix protein 2-like, partial [Bos taurus]	-	-	-	-	-	-	-	--
miR-141-y	MSTRG.20070	965	986	-12.72	aTTGTGACTACATAAGTTTTat	x|||||||x|x|:x|x|x:|xx	tAACACTG-TCTGGTAACGAtg	CCNG1	TPA: cyclin-G1-like [Bos taurus]	Human Diseases;Cellular Processes	Cancer: overview;Cell growth and death	ko05206//MicroRNAs in cancer;ko04115//p53 signaling pathway	K10145;K10145	GO:0043005//neuron projection;GO:0043231//intracellular membrane-bounded organelle;GO:0044297//cell body;GO:0044444//cytoplasmic part	GO:0005515//protein binding	GO:0000280//nuclear division;GO:0007417//central nervous system development;GO:0009719//response to endogenous stimulus;GO:0031572//G2 DNA damage checkpoint;GO:0040007//growth;GO:0042981//regulation of apoptotic process;GO:0048646//anatomical structure formation involved in morphogenesis;GO:0051726//regulation of cell cycle	--
miR-141-y	MSTRG.22496	386	406	-14.6	aTTGTGACttttccgcatcag	x|||||||xxxxxxxxxxxxx	tAACACTGtctggtaacgatg	--	endonuclease-reverse transcriptase [Babesia ovata]	-	-	-	-	GO:0031252//cell leading edge;GO:0070161//anchoring junction	GO:0003779//actin binding;GO:0050839//cell adhesion molecule binding	GO:0010468//regulation of gene expression;GO:0098602//single organism cell adhesion	--
miR-141-y	MSTRG.4090	806	826	-11.67	gTTGTGACtattttcaaatta	x|||||||xxxxxxxxxxxxx	tAACACTGtctggtaacgatg	--	PREDICTED: basic salivary proline-rich protein 1-like isoform X2 [Bos indicus]	-	-	-	-	GO:0031224//intrinsic component of membrane;GO:0044421//extracellular region part	GO:0043169//cation binding;GO:0060089//molecular transducer activity	GO:0007162//negative regulation of cell adhesion;GO:0007169//transmembrane receptor protein tyrosine kinase signaling pathway;GO:0007606//sensory perception of chemical stimulus;GO:0010596//negative regulation of endothelial cell migration;GO:0045765//regulation of angiogenesis;GO:0048869//cellular developmental process;GO:0050922//negative regulation of chemotaxis	--
miR-141-y	MSTRG.4101	600	620	-21.49	cTTGTGACGGGTTGTTGTcga	x|||||||:|::::|||:xxx	tAACACTGTCTGGTAACGatg	--	-	-	-	-	-	-	-	-	--
miR-141-y	MSTRG.9831	395	415	-17.25	cTTGTGACGGGCgtagaccca	x|||||||:|:|xxxxxxxxx	tAACACTGTCTGgtaacgatg	Arc	PREDICTED: LOW QUALITY PROTEIN: activity-regulated cytoskeleton-associated protein [Bos mutus]	Human Diseases	Substance dependence	ko05031//Amphetamine addiction	K15867	GO:0005856//cytoskeleton;GO:0030141//secretory granule;GO:0044309//neuron spine;GO:0097060//synaptic membrane	GO:0005488//binding	GO:0003002//regionalization;GO:0006996//organelle organization;GO:0007611//learning or memory;GO:0009888//tissue development;GO:0016192//vesicle-mediated transport;GO:0022603//regulation of anatomical structure morphogenesis;GO:0032414//positive regulation of ion transmembrane transporter activity;GO:0048167//regulation of synaptic plasticity;GO:0048870//cell motility	--
miR-2396-z	MSTRG.15669	1020	1040	-15.07	cGTACGTG-TTTAACAGCgcct	x|||||||x:::x|x|:|xxxx	tCATGCACTGGGATCTTGatgg	--	-	-	-	-	-	-	-	-	--
miR-2396-z	MSTRG.4090	17144	17166	-20.09	gGTACGTGGACGTCCGGACacag	x|||||||:x|x|xx|:||xxxx	tCATGCACTGGGAT-CTTGatgg	--	PREDICTED: basic salivary proline-rich protein 1-like isoform X2 [Bos indicus]	-	-	-	-	GO:0031224//intrinsic component of membrane;GO:0044421//extracellular region part	GO:0043169//cation binding;GO:0060089//molecular transducer activity	GO:0007162//negative regulation of cell adhesion;GO:0007169//transmembrane receptor protein tyrosine kinase signaling pathway;GO:0007606//sensory perception of chemical stimulus;GO:0010596//negative regulation of endothelial cell migration;GO:0045765//regulation of angiogenesis;GO:0048869//cellular developmental process;GO:0050922//negative regulation of chemotaxis	--
miR-147-y	MSTRG.15080	611	632	-15.47	gACACGCCGGAACCCGCACagt	x|||||||xxx||xx:x||xxx	gTGTGCGGAAATGCTTCTGcta	--	PREDICTED: immunoglobulin superfamily member 23 [Bos mutus]	-	-	-	-	-	-	-	--
miR-377-y	MSTRG.1213	1885	1906	-13.34	cAGTGTGTGGACGgggtctcgt	x|||||||xxx||xxxxxxxxx	aTCACACAAAGGCaacttttgt	--	-	-	-	-	-	-	-	-	--
miR-377-y	MSTRG.1430	3397	3429	-24.24	aAGTGTGTAAAGTTTATAATTCCGTTGAAAAag	x|||||||xxxxxxxxxxx||||||||||||xx	aTCACACA-----------AAGGCAACTTTTgt	FBXO30	PREDICTED: F-box only protein 30 [Bison bison bison]	-	-	-	-	-	GO:0004721//phosphoprotein phosphatase activity;GO:0019787//ubiquitin-like protein transferase activity;GO:0030247//polysaccharide binding;GO:0046914//transition metal ion binding	GO:0006470//protein dephosphorylation;GO:0032446//protein modification by small protein conjugation	--
miR-377-y	MSTRG.15080	411	434	-13.17	gAGTGTGTCAGTTTACTGAAActa	x|||||||xxx|::xx|||||xxx	aTCACACAA--AGGCAACTTTtgt	--	PREDICTED: immunoglobulin superfamily member 23 [Bos mutus]	-	-	-	-	-	-	-	--
miR-377-y	MSTRG.18722	61	82	-13.23	cAGTGTGTgccacggggtcctc	x|||||||xxxxxxxxxxxxxx	aTCACACAaaggcaacttttgt	DMBT1	PREDICTED: deleted in malignant brain tumors 1 protein isoform X6 [Bison bison bison]	Organismal Systems	Digestive system	ko04970//Salivary secretion	K13912	GO:0030666//endocytic vesicle membrane;GO:0030667//secretory granule membrane;GO:0031012//extracellular matrix;GO:0044421//extracellular region part;GO:0044425//membrane part	GO:0019899//enzyme binding;GO:0038023//signaling receptor activity;GO:0038024//cargo receptor activity	GO:0001701//in utero embryonic development;GO:0002758//innate immune response-activating signal transduction;GO:0006897//endocytosis;GO:0008283//cell proliferation;GO:0019731//antibacterial humoral response;GO:0030856//regulation of epithelial cell differentiation	--
miR-377-y	MSTRG.4478	22	43	-11.3	aAGTGTGTCTTTATaccgacat	x|||||||x|::x|xxxxxxxx	aTCACACAAAGGCAacttttgt	F52C9.6	endonuclease-reverse transcriptase [Babesia ovata]	-	-	-	-	-	-	-	--
miR-10182-x	MSTRG.22496	686	707	-20.49	aTCAGGCC---GCTCTATctcgacg	x|||||||xxx||x|:|:xxxxxxx	cAGTCCGGTCCCGCGGTGtctccgc	--	endonuclease-reverse transcriptase [Babesia ovata]	-	-	-	-	GO:0031252//cell leading edge;GO:0070161//anchoring junction	GO:0003779//actin binding;GO:0050839//cell adhesion molecule binding	GO:0010468//regulation of gene expression;GO:0098602//single organism cell adhesion	--
miR-10182-x	MSTRG.4090	15180	15204	-20.61	tTCAGGCCGactagacccgactcct	x|||||||:xxxxxxxxxxxxxxxx	cAGTCCGGTcccgcggtgtctccgc	--	PREDICTED: basic salivary proline-rich protein 1-like isoform X2 [Bos indicus]	-	-	-	-	GO:0031224//intrinsic component of membrane;GO:0044421//extracellular region part	GO:0043169//cation binding;GO:0060089//molecular transducer activity	GO:0007162//negative regulation of cell adhesion;GO:0007169//transmembrane receptor protein tyrosine kinase signaling pathway;GO:0007606//sensory perception of chemical stimulus;GO:0010596//negative regulation of endothelial cell migration;GO:0045765//regulation of angiogenesis;GO:0048869//cellular developmental process;GO:0050922//negative regulation of chemotaxis	--
miR-10182-x	MSTRG.9831	212	239	-26.87	cTCAGGCCAGCGACCGATGCCTGAGcaa	x|||||||||x|xx||x::|xx|||xxx	cAGTCCGGTCCC--GCGGTGT-CTCcgc	Arc	PREDICTED: LOW QUALITY PROTEIN: activity-regulated cytoskeleton-associated protein [Bos mutus]	Human Diseases	Substance dependence	ko05031//Amphetamine addiction	K15867	GO:0005856//cytoskeleton;GO:0030141//secretory granule;GO:0044309//neuron spine;GO:0097060//synaptic membrane	GO:0005488//binding	GO:0003002//regionalization;GO:0006996//organelle organization;GO:0007611//learning or memory;GO:0009888//tissue development;GO:0016192//vesicle-mediated transport;GO:0022603//regulation of anatomical structure morphogenesis;GO:0032414//positive regulation of ion transmembrane transporter activity;GO:0048167//regulation of synaptic plasticity;GO:0048870//cell motility	--
miR-5108-z	MSTRG.29222	4957	4978	-21	tCCATCTCTATGGGTCTCCCag	x|||||||xx||:x:||x||xx	gGGTAGAGC-ACT-GGATGGat	--	serine/arginine repetitive matrix protein 1-like [Zalophus californianus]	-	-	-	-	GO:0042579//microbody	GO:0005515//protein binding;GO:0016647//oxidoreductase activity, acting on the CH-NH group of donors, oxygen as acceptor	GO:0006596//polyamine biosynthetic process;GO:0006598//polyamine catabolic process;GO:0031328//positive regulation of cellular biosynthetic process;GO:0044710//single-organism metabolic process;GO:0051234//establishment of localization	--
miR-5108-z	MSTRG.31466	131	149	-24.15	gCCATCTCGAG-CCTGCggc	x||||||||x|x|||:|xxx	gGGTAGAGCACTGGATGgat	LONRF2	LOW QUALITY PROTEIN: LON peptidase N-terminal domain and RING finger protein 2 [Bos taurus]	-	-	-	-	-	GO:0046914//transition metal ion binding	GO:0019538//protein metabolic process	--
miR-5108-z	MSTRG.33557	335	354	-15.42	gCCATCTCCCGTCaagggcc	x|||||||xx|x|xxxxxxx	gGGTAGAGCACTGgatggat	ARHGAP6	rho GTPase-activating protein 6 isoform X2 [Bos indicus x Bos taurus]	-	-	-	-	GO:0015629//actin cytoskeleton;GO:0044444//cytoplasmic part	GO:0019899//enzyme binding;GO:0019904//protein domain specific binding;GO:0030674//protein binding, bridging;GO:0060229//lipase activator activity	GO:0001953//negative regulation of cell-matrix adhesion;GO:0007045//cell-substrate adherens junction assembly;GO:0008154//actin polymerization or depolymerization;GO:0010863//positive regulation of phospholipase C activity;GO:0032232//negative regulation of actin filament bundle assembly;GO:0043087//regulation of GTPase activity	--
miR-483-y	MSTRG.14602	476	498	-24.09	gGTGAGGAGGGccctctttatgt	x||||||||:|xxxxxxxxxxxx	tCACTCCTCTCctcccgtcttct	ZNF671	zinc finger protein 28 homolog [Zalophus californianus]	Human Diseases	Infectious disease: viral	ko05168//Herpes simplex virus 1 infection	K09228	-	-	-	--
miR-483-y	MSTRG.18801	957	979	-19.43	aGTGAGGAGAattctgtaacata	x|||||||||xxxxxxxxxxxxx	tCACTCCTCTcctcccgtcttct	MKI67	PREDICTED: antigen KI-67 [Bos mutus]	-	-	-	-	GO:0005694//chromosome;GO:0043231//intracellular membrane-bounded organelle	GO:0003723//RNA binding;GO:0005515//protein binding;GO:0036094//small molecule binding	GO:0000280//nuclear division;GO:0009408//response to heat;GO:0010033//response to organic substance;GO:0031099//regeneration;GO:0044260//cellular macromolecule metabolic process;GO:0044763//single-organism cellular process;GO:1903510//mucopolysaccharide metabolic process	--
miR-483-y	MSTRG.1906	131	153	-13.77	cGTGAGGAcgtccccgacgacac	x|||||||xxxxxxxxxxxxxxx	tCACTCCTctcctcccgtcttct	UQCRC2	cytochrome b-c1 complex subunit 2, mitochondrial [Bos taurus]	Metabolism;Human Diseases;Human Diseases;Organismal Systems;Human Diseases;Metabolism;Human Diseases;Organismal Systems	Global and overview maps;Neurodegenerative disease;Neurodegenerative disease;Environmental adaptation;Endocrine and metabolic disease;Energy metabolism;Neurodegenerative disease;Circulatory system	ko01100//Metabolic pathways;ko05010//Alzheimer disease;ko05016//Huntington disease;ko04714//Thermogenesis;ko04932//Non-alcoholic fatty liver disease;ko00190//Oxidative phosphorylation;ko05012//Parkinson disease;ko04260//Cardiac muscle contraction	K00415;K00415;K00415;K00415;K00415;K00415;K00415;K00415	GO:0019866//organelle inner membrane;GO:0031988//membrane-bounded vesicle;GO:0044455//mitochondrial membrane part	GO:0004175//endopeptidase activity;GO:0005515//protein binding;GO:0043169//cation binding	GO:0019538//protein metabolic process;GO:0022900//electron transport chain;GO:0045333//cellular respiration;GO:0051234//establishment of localization	--
miR-483-y	MSTRG.4090	2655	2677	-28.7	gGTGAGGAGAAGAGTCCGGGAcg	x|||||||||x|||xx|:|:|xx	tCACTCCTCTCCTCCCGTCTTct	--	PREDICTED: basic salivary proline-rich protein 1-like isoform X2 [Bos indicus]	-	-	-	-	GO:0031224//intrinsic component of membrane;GO:0044421//extracellular region part	GO:0043169//cation binding;GO:0060089//molecular transducer activity	GO:0007162//negative regulation of cell adhesion;GO:0007169//transmembrane receptor protein tyrosine kinase signaling pathway;GO:0007606//sensory perception of chemical stimulus;GO:0010596//negative regulation of endothelial cell migration;GO:0045765//regulation of angiogenesis;GO:0048869//cellular developmental process;GO:0050922//negative regulation of chemotaxis	--
miR-483-y	MSTRG.4101	391	416	-20.91	cGTGAGGACTGACGGACGTGGGGAtt	x|||||||xx||x|||x|xx:|:|xx	tCACTCCT--CT-CCTCCCGTCTTct	--	-	-	-	-	-	-	-	-	--
miR-483-y	MSTRG.9421	1258	1282	-16.59	tGTGAGGACCAAGGAaactctctac	x|||||||xxx||||xxxxxxxxxx	tCACTCCTC--TCCTcccgtcttct	--	thymocyte nuclear protein 1 isoform X2 [Odocoileus virginianus texanus]	-	-	-	-	-	-	-	--
miR-11994-z	MSTRG.17502	610	632	-23.38	aCTCTCAAGAGGTGGTACTggca	x||||||||x|::::x||:xxxx	tGAGAGTTCCCTGTTCTGGatgt	C4A	PREDICTED: complement C4-B-like isoform X1 [Bison bison bison]	Human Diseases;Human Diseases;Organismal Systems;Human Diseases	Immune disease;Infectious disease: bacterial;Immune system;Infectious disease: bacterial	ko05322//Systemic lupus erythematosus;ko05150//Staphylococcus aureus infection;ko04610//Complement and coagulation cascades;ko05133//Pertussis	K03989;K03989;K03989;K03989	GO:0016020//membrane;GO:0031988//membrane-bounded vesicle;GO:0044217//other organism part	GO:0001846//opsonin binding;GO:0061135//endopeptidase regulator activity	GO:0002237//response to molecule of bacterial origin;GO:0002673//regulation of acute inflammatory response;GO:0006956//complement activation;GO:0010466//negative regulation of peptidase activity;GO:0019724//B cell mediated immunity;GO:0043277//apoptotic cell clearance	--
miR-11994-z	MSTRG.27704	229	252	-16.77	aCTCTCAAACTATACAGACaagtt	x|||||||xxx|:|x||||xxxxx	tGAGAGTTCCCTGT-TCTGgatgt	pol	PREDICTED: endogenous retrovirus group K member 19 Env polyprotein-like [Bison bison bison]	-	-	-	-	GO:0019012//virion;GO:0030131//clathrin adaptor complex;GO:0030135//coated vesicle;GO:0036464//cytoplasmic ribonucleoprotein granule	GO:0000175//3'-5'-exoribonuclease activity;GO:0008289//lipid binding;GO:0015631//tubulin binding;GO:0016740//transferase activity;GO:0043167//ion binding;GO:0044822//poly(A) RNA binding	GO:0001649//osteoblast differentiation;GO:0002237//response to molecule of bacterial origin;GO:0006259//DNA metabolic process;GO:0007009//plasma membrane organization;GO:0007623//circadian rhythm;GO:0022618//ribonucleoprotein complex assembly;GO:0043488//regulation of mRNA stability;GO:0045597//positive regulation of cell differentiation;GO:0045807//positive regulation of endocytosis;GO:0090501//…	--
miR-11994-z	MSTRG.4478	1050	1072	-13.83	aCTCTCAAcctggtattttttcc	x|||||||xxxxxxxxxxxxxxx	tGAGAGTTccctgttctggatgt	F52C9.6	endonuclease-reverse transcriptase [Babesia ovata]	-	-	-	-	-	-	-	--
miR-11994-z	MSTRG.9563	392	412	-12.98	cCTCTCAAAT-ACC-GATCTttg	x|||||||xxx||xx||:||xxx	tGAGAGTTCCCTGTTCTGGAtgt	AHNAK2	PREDICTED: protein AHNAK2 [Bos mutus]	Human Diseases	Infectious disease: bacterial	ko05132//Salmonella infection	K23934	GO:0012506//vesicle membrane;GO:0031674//I band;GO:0044459//plasma membrane part	-	GO:0007009//plasma membrane organization	--
miR-11994-z	MSTRG.9565	1194	1214	-12.98	cCTCTCAAAT-ACC-GATCTttg	x|||||||xxx||xx||:||xxx	tGAGAGTTCCCTGTTCTGGAtgt	--	protein AHNAK2 [Bubalus bubalis]	Human Diseases	Infectious disease: bacterial	ko05132//Salmonella infection	K23934	GO:0005886//plasma membrane;GO:0043229//intracellular organelle;GO:0044422//organelle part;GO:0044444//cytoplasmic part	-	-	--
miR-302-y	MSTRG.17500	2169	2192	-15.13	gTTCACGAGTCTTACGAAcagacc	x|||||||:xx|x||:||xxxxxx	tAAGTGCTTCCA-TGTTTtagtag	C4B	complement C4 isoform X1 [Bos taurus]	Human Diseases;Human Diseases;Organismal Systems;Human Diseases	Immune disease;Infectious disease: bacterial;Immune system;Infectious disease: bacterial	ko05322//Systemic lupus erythematosus;ko05150//Staphylococcus aureus infection;ko04610//Complement and coagulation cascades;ko05133//Pertussis	K03989;K03989;K03989;K03989	GO:0016020//membrane;GO:0031988//membrane-bounded vesicle;GO:0044217//other organism part	GO:0001846//opsonin binding;GO:0061135//endopeptidase regulator activity	GO:0002237//response to molecule of bacterial origin;GO:0002673//regulation of acute inflammatory response;GO:0006956//complement activation;GO:0010466//negative regulation of peptidase activity;GO:0019724//B cell mediated immunity;GO:0043277//apoptotic cell clearance	--
miR-302-y	MSTRG.7032	541	563	-12.48	gTTCACGAcatcgacctgtcccg	x|||||||xxxxxxxxxxxxxxx	tAAGTGCTtccatgttttagtag	--	arf-GAP with dual PH domain-containing protein 2 isoform X1 [Cervus canadensis]	-	-	-	-	-	GO:0016647//oxidoreductase activity, acting on the CH-NH group of donors, oxygen as acceptor	GO:0006598//polyamine catabolic process;GO:0010467//gene expression;GO:0044238//primary metabolic process;GO:0044271//cellular nitrogen compound biosynthetic process;GO:1901576//organic substance biosynthetic process	--
miR-302-y	MSTRG.9896	1754	1776	-12.38	cTTCACGACGtccgcgcggagga	x|||||||x|xxxxxxxxxxxxx	tAAGTGCTTCcatgttttagtag	--	IQ motif and ankyrin repeat domain-containing protein 1 isoform X4 [Cervus canadensis]	-	-	-	-	-	-	-	--
miR-6516-y	MSTRG.1430	2715	2736	-17.21	cAGTACATATTAGAACGaggaa	x||||||||:||xx|||xxxxx	aTCATGTATGATACTGCaaaca	FBXO30	PREDICTED: F-box only protein 30 [Bison bison bison]	-	-	-	-	-	GO:0004721//phosphoprotein phosphatase activity;GO:0019787//ubiquitin-like protein transferase activity;GO:0030247//polysaccharide binding;GO:0046914//transition metal ion binding	GO:0006470//protein dephosphorylation;GO:0032446//protein modification by small protein conjugation	--
miR-3956-x	MSTRG.17500	2504	2525	-20.05	gATGCACCT-CGGTCTCacccac	x||||||||x||::x||xxxxxx	gTACGTGGATGCTGAAGgtcaga	C4B	complement C4 isoform X1 [Bos taurus]	Human Diseases;Human Diseases;Organismal Systems;Human Diseases	Immune disease;Infectious disease: bacterial;Immune system;Infectious disease: bacterial	ko05322//Systemic lupus erythematosus;ko05150//Staphylococcus aureus infection;ko04610//Complement and coagulation cascades;ko05133//Pertussis	K03989;K03989;K03989;K03989	GO:0016020//membrane;GO:0031988//membrane-bounded vesicle;GO:0044217//other organism part	GO:0001846//opsonin binding;GO:0061135//endopeptidase regulator activity	GO:0002237//response to molecule of bacterial origin;GO:0002673//regulation of acute inflammatory response;GO:0006956//complement activation;GO:0010466//negative regulation of peptidase activity;GO:0019724//B cell mediated immunity;GO:0043277//apoptotic cell clearance	--
miR-3956-x	MSTRG.7032	782	808	-19.18	tATGCACCCGTAGAACGGTTTCGCTgg	x|||||||xx||xx||xx||:|:x|xx	gTACGTGG--ATGCTG--AAGGTCAga	--	arf-GAP with dual PH domain-containing protein 2 isoform X1 [Cervus canadensis]	-	-	-	-	-	GO:0016647//oxidoreductase activity, acting on the CH-NH group of donors, oxygen as acceptor	GO:0006598//polyamine catabolic process;GO:0010467//gene expression;GO:0044238//primary metabolic process;GO:0044271//cellular nitrogen compound biosynthetic process;GO:1901576//organic substance biosynthetic process	--
miR-450-z	MSTRG.21507	2285	2308	-11.55	aAAACGTTTGACATTTACGTcgag	x|||||||xx|||xxx||x|xxxx	tTTTGCAATATGTTCCTGAAtatt	Slc29a2	equilibrative nucleoside transporter 2 isoform X2 [Bos taurus]	Human Diseases	Substance dependence	ko05034//Alcoholism	K15014	GO:0016021//integral component of membrane;GO:0031090//organelle membrane;GO:0043231//intracellular membrane-bounded organelle;GO:0043232//intracellular non-membrane-bounded organelle	GO:0015932//nucleobase-containing compound transmembrane transporter activity	GO:0006725//cellular aromatic compound metabolic process;GO:0006863//purine nucleobase transport;GO:0007589//body fluid secretion;GO:0015855//pyrimidine nucleobase transport;GO:0015864//pyrimidine nucleoside transport;GO:0032868//response to insulin;GO:0044763//single-organism cellular process	--
miR-450-z	MSTRG.27704	1733	1755	-10.97	tAAACGTTG-ACAActgaaagtaa	x|||||||:x||||xxxxxxxxxx	tTTTGCAATATGTTcctgaatatt	pol	PREDICTED: endogenous retrovirus group K member 19 Env polyprotein-like [Bison bison bison]	-	-	-	-	GO:0019012//virion;GO:0030131//clathrin adaptor complex;GO:0030135//coated vesicle;GO:0036464//cytoplasmic ribonucleoprotein granule	GO:0000175//3'-5'-exoribonuclease activity;GO:0008289//lipid binding;GO:0015631//tubulin binding;GO:0016740//transferase activity;GO:0043167//ion binding;GO:0044822//poly(A) RNA binding	GO:0001649//osteoblast differentiation;GO:0002237//response to molecule of bacterial origin;GO:0006259//DNA metabolic process;GO:0007009//plasma membrane organization;GO:0007623//circadian rhythm;GO:0022618//ribonucleoprotein complex assembly;GO:0043488//regulation of mRNA stability;GO:0045597//positive regulation of cell differentiation;GO:0045807//positive regulation of endocytosis;GO:0090501//…	--
miR-769-x	MSTRG.14602	575	596	-21.55	aCTCTGGACCTTTGACGTTCag	x|||||||xx::::|x::||xx	gGAGACCTCCGGGTTCTGAGct	ZNF671	zinc finger protein 28 homolog [Zalophus californianus]	Human Diseases	Infectious disease: viral	ko05168//Herpes simplex virus 1 infection	K09228	-	-	-	--
miR-769-x	MSTRG.29222	4289	4311	-29.81	tCTCTGGAGGGCCTCCTACTCtc	x|||||||||x||:xxx||||xx	gGAGACCTCC-GGGTTCTGAGct	--	serine/arginine repetitive matrix protein 1-like [Zalophus californianus]	-	-	-	-	GO:0042579//microbody	GO:0005515//protein binding;GO:0016647//oxidoreductase activity, acting on the CH-NH group of donors, oxygen as acceptor	GO:0006596//polyamine biosynthetic process;GO:0006598//polyamine catabolic process;GO:0031328//positive regulation of cellular biosynthetic process;GO:0044710//single-organism metabolic process;GO:0051234//establishment of localization	--
miR-769-x	MSTRG.32506	345	364	-23.89	cCTCTGGA--CTCGGGAGTaag	x|||||||xx|:|::||x|xxx	gGAGACCTCCGGGTTCTGAgct	--	probable inactive serine/threonine-protein kinase slob2 isoform X1 [Vicugna pacos]	-	-	-	-	-	-	-	--
miR-769-x	MSTRG.4090	13722	13743	-26.82	tCTCTGGATGTCCGGGAgcact	x|||||||x|:||::||xxxxx	gGAGACCTCCGGGTTCTgagct	--	PREDICTED: basic salivary proline-rich protein 1-like isoform X2 [Bos indicus]	-	-	-	-	GO:0031224//intrinsic component of membrane;GO:0044421//extracellular region part	GO:0043169//cation binding;GO:0060089//molecular transducer activity	GO:0007162//negative regulation of cell adhesion;GO:0007169//transmembrane receptor protein tyrosine kinase signaling pathway;GO:0007606//sensory perception of chemical stimulus;GO:0010596//negative regulation of endothelial cell migration;GO:0045765//regulation of angiogenesis;GO:0048869//cellular developmental process;GO:0050922//negative regulation of chemotaxis	--
miR-769-x	MSTRG.4101	784	803	-22.06	aCTCTGGA--CCTGAGAagggt	x|||||||xx||::|||xxxxx	gGAGACCTCCGGGTTCTgagct	--	-	-	-	-	-	-	-	-	--
miR-769-x	MSTRG.6869	591	612	-16.91	tCTCTGGAACACTATGGTTTtt	x|||||||xxx|:|x|::|:xx	gGAGACCTCCGGGTTCTGAGct	ABCC4	multidrug resistance-associated protein 4-like isoform X1 [Bos indicus x Bos taurus]	Environmental Information Processing;Organismal Systems;Environmental Information Processing;Human Diseases	Signal transduction;Digestive system;Membrane transport;Drug resistance: antineoplastic	ko04024//cAMP signaling pathway;ko04976//Bile secretion;ko02010//ABC transporters;ko01523//Antifolate resistance	K05673;K05673;K05673;K05673	GO:0030667//secretory granule membrane;GO:0031224//intrinsic component of membrane	GO:0015405//P-P-bond-hydrolysis-driven transmembrane transporter activity;GO:0016616//oxidoreductase activity, acting on the CH-OH group of donors, NAD or NADP as acceptor;GO:0016887//ATPase activity;GO:0032550//purine ribonucleoside binding	GO:0001775//cell activation;GO:0006811//ion transport;GO:0007599//hemostasis;GO:0008284//positive regulation of cell proliferation;GO:0009719//response to endogenous stimulus;GO:0010033//response to organic substance;GO:0015893//drug transport;GO:0044710//single-organism metabolic process	--
miR-1185-x	MSTRG.1430	1220	1241	-12.86	aCTCCTATACGActtggcacgg	x|||||||xx||xxxxxxxxxx	aGAGGATACCCTttgtatgttc	FBXO30	PREDICTED: F-box only protein 30 [Bison bison bison]	-	-	-	-	-	GO:0004721//phosphoprotein phosphatase activity;GO:0019787//ubiquitin-like protein transferase activity;GO:0030247//polysaccharide binding;GO:0046914//transition metal ion binding	GO:0006470//protein dephosphorylation;GO:0032446//protein modification by small protein conjugation	--
miR-1185-x	MSTRG.21507	289	310	-10.38	gCTCCTATttcttcgactaggg	x|||||||xxxxxxxxxxxxxx	aGAGGATAccctttgtatgttc	Slc29a2	equilibrative nucleoside transporter 2 isoform X2 [Bos taurus]	Human Diseases	Substance dependence	ko05034//Alcoholism	K15014	GO:0016021//integral component of membrane;GO:0031090//organelle membrane;GO:0043231//intracellular membrane-bounded organelle;GO:0043232//intracellular non-membrane-bounded organelle	GO:0015932//nucleobase-containing compound transmembrane transporter activity	GO:0006725//cellular aromatic compound metabolic process;GO:0006863//purine nucleobase transport;GO:0007589//body fluid secretion;GO:0015855//pyrimidine nucleobase transport;GO:0015864//pyrimidine nucleoside transport;GO:0032868//response to insulin;GO:0044763//single-organism cellular process	--
miR-935-z	MSTRG.16811	41	63	-18.31	aTCAATGGGCGCGCAGGGTGtac	x|||||||x||x:xxx|:||xxx	cAGTTACC-GCTTCCGCTACcgc	--	TPR and ankyrin repeat-containing protein 1 isoform X3 [Bos taurus]	-	-	-	-	-	GO:0003824//catalytic activity	-	--
miR-935-z	MSTRG.17502	794	817	-10.66	cTCAATGGACCGGAcctactagta	x|||||||xx||:|xxxxxxxxxx	cAGTTACC--GCTTccgctaccgc	C4A	PREDICTED: complement C4-B-like isoform X1 [Bison bison bison]	Human Diseases;Human Diseases;Organismal Systems;Human Diseases	Immune disease;Infectious disease: bacterial;Immune system;Infectious disease: bacterial	ko05322//Systemic lupus erythematosus;ko05150//Staphylococcus aureus infection;ko04610//Complement and coagulation cascades;ko05133//Pertussis	K03989;K03989;K03989;K03989	GO:0016020//membrane;GO:0031988//membrane-bounded vesicle;GO:0044217//other organism part	GO:0001846//opsonin binding;GO:0061135//endopeptidase regulator activity	GO:0002237//response to molecule of bacterial origin;GO:0002673//regulation of acute inflammatory response;GO:0006956//complement activation;GO:0010466//negative regulation of peptidase activity;GO:0019724//B cell mediated immunity;GO:0043277//apoptotic cell clearance	--
miR-935-z	MSTRG.9563	1508	1530	-23.97	gTCAATGGTGCCTCGGGAGGGtc	x|||||||:|xxxx|x||x||xx	cAGTTACCGCTTC-CGCTACCgc	AHNAK2	PREDICTED: protein AHNAK2 [Bos mutus]	Human Diseases	Infectious disease: bacterial	ko05132//Salmonella infection	K23934	GO:0012506//vesicle membrane;GO:0031674//I band;GO:0044459//plasma membrane part	-	GO:0007009//plasma membrane organization	--
miR-6240-z	MSTRG.13725	747	768	-20.56	aGTAGCGCTCTACTCCCGGaag	x||||||||xxxx|||x||xxx	gCATCGCGA----AGGCCCgcg	--	serine/arginine repetitive matrix protein 2-like, partial [Bos taurus]	-	-	-	-	-	-	-	--
miR-2483-y	MSTRG.18801	1460	1481	-20.45	cTTGTAGACCAGTAGACgggac	x||||||||||::x:||xxxxx	aAACATCTGGTTGGTTGagaga	MKI67	PREDICTED: antigen KI-67 [Bos mutus]	-	-	-	-	GO:0005694//chromosome;GO:0043231//intracellular membrane-bounded organelle	GO:0003723//RNA binding;GO:0005515//protein binding;GO:0036094//small molecule binding	GO:0000280//nuclear division;GO:0009408//response to heat;GO:0010033//response to organic substance;GO:0031099//regeneration;GO:0044260//cellular macromolecule metabolic process;GO:0044763//single-organism cellular process;GO:1903510//mucopolysaccharide metabolic process	--
miR-2483-y	MSTRG.3720	178	199	-15.55	gTTGTAGAAGACTCAGTcgtca	x|||||||xx|x:||::xxxxx	aAACATCTGGTTGGTTGagaga	--	zinc finger protein 438 isoform X1 [Odocoileus virginianus texanus]	-	-	-	-	GO:0043231//intracellular membrane-bounded organelle	GO:0001071//nucleic acid binding transcription factor activity;GO:0043169//cation binding	GO:0006355//regulation of transcription, DNA-templated	--
miR-2483-y	MSTRG.4090	2249	2269	-18.61	tTTGTAGAC-GACTACCTTagt	x||||||||x:||:|x||:xxx	aAACATCTGGTTGGTTGAGaga	--	PREDICTED: basic salivary proline-rich protein 1-like isoform X2 [Bos indicus]	-	-	-	-	GO:0031224//intrinsic component of membrane;GO:0044421//extracellular region part	GO:0043169//cation binding;GO:0060089//molecular transducer activity	GO:0007162//negative regulation of cell adhesion;GO:0007169//transmembrane receptor protein tyrosine kinase signaling pathway;GO:0007606//sensory perception of chemical stimulus;GO:0010596//negative regulation of endothelial cell migration;GO:0045765//regulation of angiogenesis;GO:0048869//cellular developmental process;GO:0050922//negative regulation of chemotaxis	--
miR-2483-y	MSTRG.6530	188	211	-17.29	cTTGTAGATAAAAACCAAgggtta	x|||||||:x||xx||||xxxxxx	aAACATCTGGTT--GGTTgagaga	--	-	-	-	-	-	-	-	-	--
miR-2483-y	MSTRG.6869	2327	2349	-10.51	aTTGTAGAATACACTTATaaaca	x|||||||x:|x||:x|:xxxxx	aAACATCTGGT-TGGTTGagaga	ABCC4	multidrug resistance-associated protein 4-like isoform X1 [Bos indicus x Bos taurus]	Environmental Information Processing;Organismal Systems;Environmental Information Processing;Human Diseases	Signal transduction;Digestive system;Membrane transport;Drug resistance: antineoplastic	ko04024//cAMP signaling pathway;ko04976//Bile secretion;ko02010//ABC transporters;ko01523//Antifolate resistance	K05673;K05673;K05673;K05673	GO:0030667//secretory granule membrane;GO:0031224//intrinsic component of membrane	GO:0015405//P-P-bond-hydrolysis-driven transmembrane transporter activity;GO:0016616//oxidoreductase activity, acting on the CH-OH group of donors, NAD or NADP as acceptor;GO:0016887//ATPase activity;GO:0032550//purine ribonucleoside binding	GO:0001775//cell activation;GO:0006811//ion transport;GO:0007599//hemostasis;GO:0008284//positive regulation of cell proliferation;GO:0009719//response to endogenous stimulus;GO:0010033//response to organic substance;GO:0015893//drug transport;GO:0044710//single-organism metabolic process	--
miR-10167-y	MSTRG.1213	1563	1583	-22.86	aCCCACCACCACCACgagacc	x|||||||x|x||x|xxxxxx	cGGGTGGTCGGGGCGggtcag	--	-	-	-	-	-	-	-	-	--
miR-10167-y	MSTRG.15958	991	1011	-15.45	tCCCACCAagagatgtgtttt	x|||||||xxxxxxxxxxxxx	cGGGTGGTcggggcgggtcag	--	-	-	-	-	-	-	-	-	--
miR-10167-y	MSTRG.22162	609	629	-25.31	cCCCACCACCTCCACCTcttc	x|||||||x|:||x||:xxxx	cGGGTGGTCGGGGCGGGtcag	--	translation initiation factor IF-2-like [Cervus canadensis]	-	-	-	-	-	-	-	--
miR-10167-y	MSTRG.28873	561	580	-23.33	cCCCACCA-CCCTACGAAGac	x|||||||x|||:x|xx||xx	cGGGTGGTCGGGGCGGGTCag	BRD4	PREDICTED: bromodomain-containing protein 4-like [Bos indicus]	-	-	-	-	GO:0000228//nuclear chromosome;GO:0000785//chromatin;GO:0008023//transcription elongation factor complex	GO:0003676//nucleic acid binding;GO:0042393//histone binding;GO:0052689//carboxylic ester hydrolase activity	GO:0000077//DNA damage checkpoint;GO:0001932//regulation of protein phosphorylation;GO:0006357//regulation of transcription from RNA polymerase II promoter;GO:0008283//cell proliferation;GO:0010389//regulation of G2/M transition of mitotic cell cycle;GO:0031347//regulation of defense response;GO:0032786//positive regulation of DNA-templated transcription, elongation;GO:0043122//regulation of I-ka…	--
miR-10167-y	MSTRG.4478	3097	3117	-16.95	tCCCACCAcagtagacgtata	x|||||||xxxxxxxxxxxxx	cGGGTGGTcggggcgggtcag	F52C9.6	endonuclease-reverse transcriptase [Babesia ovata]	-	-	-	-	-	-	-	--
miR-10167-y	MSTRG.6898	80	100	-16.95	tCCCACCAcagtagacgtata	x|||||||xxxxxxxxxxxxx	cGGGTGGTcggggcgggtcag	ABCC4	multidrug resistance-associated protein 4-like isoform X3 [Bos indicus x Bos taurus]	Environmental Information Processing;Organismal Systems;Environmental Information Processing;Human Diseases	Signal transduction;Digestive system;Membrane transport;Drug resistance: antineoplastic	ko04024//cAMP signaling pathway;ko04976//Bile secretion;ko02010//ABC transporters;ko01523//Antifolate resistance	K05673;K05673;K05673;K05673	GO:0030667//secretory granule membrane;GO:0031224//intrinsic component of membrane	GO:0005253//anion channel activity;GO:0016616//oxidoreductase activity, acting on the CH-OH group of donors, NAD or NADP as acceptor;GO:0032550//purine ribonucleoside binding;GO:0042626//ATPase activity, coupled to transmembrane movement of substances	GO:0001775//cell activation;GO:0006821//chloride transport;GO:0007599//hemostasis;GO:0008284//positive regulation of cell proliferation;GO:0009719//response to endogenous stimulus;GO:0010033//response to organic substance;GO:0015893//drug transport;GO:0044710//single-organism metabolic process	--
miR-10167-y	MSTRG.9896	1050	1070	-34.83	cCCCACCAGTCTCGTCGGGgc	x||||||||:|:||:|x:|xx	cGGGTGGTCGGGGCGGGTCag	--	IQ motif and ankyrin repeat domain-containing protein 1 isoform X4 [Cervus canadensis]	-	-	-	-	-	-	-	--
miR-210-y	MSTRG.1213	1520	1541	-25.53	cGACACGC-TAGTGTCGACGGtc	x|||||||x:|x|||||x||:xx	aCTGTGCGTGTGACAGCGGCTgt	--	-	-	-	-	-	-	-	-	--
miR-210-y	MSTRG.15080	611	633	-19.52	cGACACGCcggaacccgcacagt	x|||||||xxxxxxxxxxxxxxx	aCTGTGCGtgtgacagcggctgt	--	PREDICTED: immunoglobulin superfamily member 23 [Bos mutus]	-	-	-	-	-	-	-	--
miR-210-y	MSTRG.9563	1633	1660	-26.46	aGACACGCTTTCCGCAGTAGGTCCGAcg	x|||||||xxxx|:|x||x|xx||||xx	aCTGTGCGT---GTGACAGC--GGCTgt	AHNAK2	PREDICTED: protein AHNAK2 [Bos mutus]	Human Diseases	Infectious disease: bacterial	ko05132//Salmonella infection	K23934	GO:0012506//vesicle membrane;GO:0031674//I band;GO:0044459//plasma membrane part	-	GO:0007009//plasma membrane organization	--
miR-210-y	MSTRG.9567	827	848	-19.21	cGACACGC-TGGAGGCCCCGGga	x|||||||x::xx|x|x|||:xx	aCTGTGCGTGTGACAGCGGCTgt	AHNAK2	protein AHNAK2 isoform X1 [Bos indicus x Bos taurus]	Human Diseases	Infectious disease: bacterial	ko05132//Salmonella infection	K23934	GO:0012506//vesicle membrane;GO:0031674//I band;GO:0044459//plasma membrane part	-	GO:0007009//plasma membrane organization	--
miR-322-x	MSTRG.10777	89	109	-14.53	tTCGTCGTTGtttctgggtcg	x||||||||:xxxxxxxxxxx	cAGCAGCAATtcatgttttgt	--	GRAM domain-containing protein 2B isoform X2 [Bos taurus]	Cellular Processes	Transport and catabolism	ko04146//Peroxisome	K00308	GO:0005737//cytoplasm;GO:0043231//intracellular membrane-bounded organelle	GO:0005515//protein binding;GO:0016647//oxidoreductase activity, acting on the CH-NH group of donors, oxygen as acceptor	GO:0006596//polyamine biosynthetic process;GO:0006598//polyamine catabolic process;GO:0009653//anatomical structure morphogenesis;GO:0016043//cellular component organization;GO:0031325//positive regulation of cellular metabolic process;GO:0031326//regulation of cellular biosynthetic process;GO:0044763//single-organism cellular process;GO:0048523//negative regulation of cellular process;GO:0048731…	--
miR-322-x	MSTRG.1213	1151	1170	-15.99	cTCGTCGT-ACGTCCGGAAcc	x|||||||x|x||x|::||xx	cAGCAGCAATTCATGTTTTgt	--	-	-	-	-	-	-	-	-	--
miR-322-x	MSTRG.1430	739	758	-15.28	tTCGTCGTCG-GTTTGAAGcc	x|||||||x:x||x::||:xx	cAGCAGCAATTCATGTTTTgt	FBXO30	PREDICTED: F-box only protein 30 [Bison bison bison]	-	-	-	-	-	GO:0004721//phosphoprotein phosphatase activity;GO:0019787//ubiquitin-like protein transferase activity;GO:0030247//polysaccharide binding;GO:0046914//transition metal ion binding	GO:0006470//protein dephosphorylation;GO:0032446//protein modification by small protein conjugation	--
miR-322-x	MSTRG.17500	979	999	-11.21	cTCGTCGTCAGCGT-TAAccct	x|||||||x|:x||x:||xxxx	cAGCAGCAATT-CATGTTttgt	C4B	complement C4 isoform X1 [Bos taurus]	Human Diseases;Human Diseases;Organismal Systems;Human Diseases	Immune disease;Infectious disease: bacterial;Immune system;Infectious disease: bacterial	ko05322//Systemic lupus erythematosus;ko05150//Staphylococcus aureus infection;ko04610//Complement and coagulation cascades;ko05133//Pertussis	K03989;K03989;K03989;K03989	GO:0016020//membrane;GO:0031988//membrane-bounded vesicle;GO:0044217//other organism part	GO:0001846//opsonin binding;GO:0061135//endopeptidase regulator activity	GO:0002237//response to molecule of bacterial origin;GO:0002673//regulation of acute inflammatory response;GO:0006956//complement activation;GO:0010466//negative regulation of peptidase activity;GO:0019724//B cell mediated immunity;GO:0043277//apoptotic cell clearance	--
miR-322-x	MSTRG.21507	1767	1787	-14.22	aTCGTCGTGAGGTCCAccggc	x|||||||x|:||x||xxxxx	cAGCAGCAATTCATGTtttgt	Slc29a2	equilibrative nucleoside transporter 2 isoform X2 [Bos taurus]	Human Diseases	Substance dependence	ko05034//Alcoholism	K15014	GO:0016021//integral component of membrane;GO:0031090//organelle membrane;GO:0043231//intracellular membrane-bounded organelle;GO:0043232//intracellular non-membrane-bounded organelle	GO:0015932//nucleobase-containing compound transmembrane transporter activity	GO:0006725//cellular aromatic compound metabolic process;GO:0006863//purine nucleobase transport;GO:0007589//body fluid secretion;GO:0015855//pyrimidine nucleobase transport;GO:0015864//pyrimidine nucleoside transport;GO:0032868//response to insulin;GO:0044763//single-organism cellular process	--
miR-322-x	MSTRG.27704	1747	1767	-10.88	tTCGTCGTCATCTAAAcgttg	x|||||||x|xx||x|xxxxx	cAGCAGCAATTCATGTtttgt	pol	PREDICTED: endogenous retrovirus group K member 19 Env polyprotein-like [Bison bison bison]	-	-	-	-	GO:0019012//virion;GO:0030131//clathrin adaptor complex;GO:0030135//coated vesicle;GO:0036464//cytoplasmic ribonucleoprotein granule	GO:0000175//3'-5'-exoribonuclease activity;GO:0008289//lipid binding;GO:0015631//tubulin binding;GO:0016740//transferase activity;GO:0043167//ion binding;GO:0044822//poly(A) RNA binding	GO:0001649//osteoblast differentiation;GO:0002237//response to molecule of bacterial origin;GO:0006259//DNA metabolic process;GO:0007009//plasma membrane organization;GO:0007623//circadian rhythm;GO:0022618//ribonucleoprotein complex assembly;GO:0043488//regulation of mRNA stability;GO:0045597//positive regulation of cell differentiation;GO:0045807//positive regulation of endocytosis;GO:0090501//…	--
miR-322-x	MSTRG.4478	4614	4636	-19.5	tTCGTCGTCACTGGTATAGAAtc	x|||||||x|xx:|||:|:||xx	cAGCAGCAAT--TCATGTTTTgt	F52C9.6	endonuclease-reverse transcriptase [Babesia ovata]	-	-	-	-	-	-	-	--
miR-322-x	MSTRG.9563	2920	2939	-17.4	tTCGTCGTTG-GCACAGAAgc	x||||||||:x|x|||:||xx	cAGCAGCAATTCATGTTTTgt	AHNAK2	PREDICTED: protein AHNAK2 [Bos mutus]	Human Diseases	Infectious disease: bacterial	ko05132//Salmonella infection	K23934	GO:0012506//vesicle membrane;GO:0031674//I band;GO:0044459//plasma membrane part	-	GO:0007009//plasma membrane organization	--
miR-2954-y	MSTRG.13725	455	475	-16.71	tTAGGGGTC--GAAAGGAACcgt	x|||||||xxx|xx||||x|xxx	cATCCCCATTCCACTCCTAGcag	--	serine/arginine repetitive matrix protein 2-like, partial [Bos taurus]	-	-	-	-	-	-	-	--
miR-2954-y	MSTRG.29222	6010	6034	-25.05	gTAGGGGTCCAAGGAGGAGACCtgg	x|||||||xx||||x|:x||x|xxx	cATCCCCA--TTCCACTCCTAGcag	--	serine/arginine repetitive matrix protein 1-like [Zalophus californianus]	-	-	-	-	GO:0042579//microbody	GO:0005515//protein binding;GO:0016647//oxidoreductase activity, acting on the CH-NH group of donors, oxygen as acceptor	GO:0006596//polyamine biosynthetic process;GO:0006598//polyamine catabolic process;GO:0031328//positive regulation of cellular biosynthetic process;GO:0044710//single-organism metabolic process;GO:0051234//establishment of localization	--
miR-2954-y	MSTRG.31308	541	565	-19.24	tTAGGGGTCGAAAGGAAGCGTTGag	x|||||||xx||x|xx||x:|:|xx	cATCCCCA--TTCCACTCCTAGCag	--	hornerin-like, partial [Bos taurus]	-	-	-	-	-	-	-	--
miR-2954-y	MSTRG.32506	1204	1230	-26.11	gTAGGGGTGAAGAGCACAGGGGTCtga	x|||||||:|x|x|xxxx:||:||xxx	cATCCCCATTCCAC----TCCTAGcag	--	probable inactive serine/threonine-protein kinase slob2 isoform X1 [Vicugna pacos]	-	-	-	-	-	-	-	--
miR-2954-y	MSTRG.4090	12747	12768	-23.61	tTAGGGGTAAGG-GACGAACcaa	x|||||||||||x||x||x|xxx	cATCCCCATTCCACTCCTAGcag	--	PREDICTED: basic salivary proline-rich protein 1-like isoform X2 [Bos indicus]	-	-	-	-	GO:0031224//intrinsic component of membrane;GO:0044421//extracellular region part	GO:0043169//cation binding;GO:0060089//molecular transducer activity	GO:0007162//negative regulation of cell adhesion;GO:0007169//transmembrane receptor protein tyrosine kinase signaling pathway;GO:0007606//sensory perception of chemical stimulus;GO:0010596//negative regulation of endothelial cell migration;GO:0045765//regulation of angiogenesis;GO:0048869//cellular developmental process;GO:0050922//negative regulation of chemotaxis	--
miR-199-z	MSTRG.29222	1746	1771	-21.53	cGGTCACAAGGAGTCTGAAGgtcccc	x|||||||||xxx|||||x|xxxxxx	cCCAGTGTTC---AGACTACgtgttc	--	serine/arginine repetitive matrix protein 1-like [Zalophus californianus]	-	-	-	-	GO:0042579//microbody	GO:0005515//protein binding;GO:0016647//oxidoreductase activity, acting on the CH-NH group of donors, oxygen as acceptor	GO:0006596//polyamine biosynthetic process;GO:0006598//polyamine catabolic process;GO:0031328//positive regulation of cellular biosynthetic process;GO:0044710//single-organism metabolic process;GO:0051234//establishment of localization	--
miR-199-z	MSTRG.31466	1762	1786	-22.56	gGGTCACACCGGTCaactcggaaga	x|||||||xx:|||xxxxxxxxxxx	cCCAGTGT--TCAGactacgtgttc	LONRF2	LOW QUALITY PROTEIN: LON peptidase N-terminal domain and RING finger protein 2 [Bos taurus]	-	-	-	-	-	GO:0046914//transition metal ion binding	GO:0019538//protein metabolic process	--
miR-199-z	MSTRG.4090	16231	16253	-27.88	gGGTCACAGGGTGTGA-GTCCAgg	x|||||||:|x|x|||x|:x||xx	cCCAGTGTTC-AGACTACGTGTtc	--	PREDICTED: basic salivary proline-rich protein 1-like isoform X2 [Bos indicus]	-	-	-	-	GO:0031224//intrinsic component of membrane;GO:0044421//extracellular region part	GO:0043169//cation binding;GO:0060089//molecular transducer activity	GO:0007162//negative regulation of cell adhesion;GO:0007169//transmembrane receptor protein tyrosine kinase signaling pathway;GO:0007606//sensory perception of chemical stimulus;GO:0010596//negative regulation of endothelial cell migration;GO:0045765//regulation of angiogenesis;GO:0048869//cellular developmental process;GO:0050922//negative regulation of chemotaxis	--
miR-199-z	MSTRG.9421	918	940	-21.44	tGGTCACAGGTAGGACCTACtca	x|||||||:||xx||xx:||xxx	cCCAGTGTTCAGACTACGTGttc	--	thymocyte nuclear protein 1 isoform X2 [Odocoileus virginianus texanus]	-	-	-	-	-	-	-	--
lin-4-z	MSTRG.18801	776	792	-15.07	cGGGACTCT--ATCGCAca	x||||||||xx||x|x|xx	tCCCTGAGACCTAACTTgt	MKI67	PREDICTED: antigen KI-67 [Bos mutus]	-	-	-	-	GO:0005694//chromosome;GO:0043231//intracellular membrane-bounded organelle	GO:0003723//RNA binding;GO:0005515//protein binding;GO:0036094//small molecule binding	GO:0000280//nuclear division;GO:0009408//response to heat;GO:0010033//response to organic substance;GO:0031099//regeneration;GO:0044260//cellular macromolecule metabolic process;GO:0044763//single-organism cellular process;GO:1903510//mucopolysaccharide metabolic process	--
lin-4-z	MSTRG.1998	1105	1124	-17.76	gGGGACTCAGCGAcggtgac	x|||||||x|x||xxxxxxx	tCCCTGAGAC-CTaacttgt	DACT2	dapper homolog 2 [Bos indicus x Bos taurus]	-	-	-	-	GO:0043231//intracellular membrane-bounded organelle	GO:0019901//protein kinase binding	GO:0000904//cell morphogenesis involved in differentiation;GO:0007155//cell adhesion;GO:0032926//negative regulation of activin receptor signaling pathway;GO:0072044//collecting duct development	--
lin-4-z	MSTRG.26854	288	307	-17.3	gGGGACTCCTGCGTCGActc	x|||||||x||x:|x||xxx	tCCCTGAG-ACCTAACTtgt	RGS12	regulator of G-protein signaling 12 isoform X3 [Cervus canadensis]	-	-	-	-	-	-	-	--
lin-4-z	MSTRG.29222	3132	3155	-24.44	cGGGACTCGGTCGGCGATTGGAcc	x|||||||x|xxxxx|||||:|xx	tCCCTGAGAC-----CTAACTTgt	--	serine/arginine repetitive matrix protein 1-like [Zalophus californianus]	-	-	-	-	GO:0042579//microbody	GO:0005515//protein binding;GO:0016647//oxidoreductase activity, acting on the CH-NH group of donors, oxygen as acceptor	GO:0006596//polyamine biosynthetic process;GO:0006598//polyamine catabolic process;GO:0031328//positive regulation of cellular biosynthetic process;GO:0044710//single-organism metabolic process;GO:0051234//establishment of localization	--
lin-4-z	MSTRG.29423	1631	1649	-13.34	cGGGACTCccgtcctcgtc	x|||||||xxxxxxxxxxx	tCCCTGAGacctaacttgt	FBN3	fibrillin-3 [Bos taurus]	-	-	-	-	-	-	GO:0007507//heart development;GO:0009887//organ morphogenesis;GO:0009987//cellular process	--
lin-4-z	MSTRG.31308	636	656	-19.82	tGGGACTCTAAGGAcagtggg	x||||||||xx|||xxxxxxx	tCCCTGAGA--CCTaacttgt	--	hornerin-like, partial [Bos taurus]	-	-	-	-	-	-	-	--
lin-4-z	MSTRG.32506	433	451	-25.53	tGGGACTCGGGGTTGGGgc	x|||||||x||:|||::xx	tCCCTGAGACCTAACTTgt	--	probable inactive serine/threonine-protein kinase slob2 isoform X1 [Vicugna pacos]	-	-	-	-	-	-	-	--
lin-4-z	MSTRG.4090	5369	5387	-23.69	aGGGACTCTGGtgtacccg	x||||||||||xxxxxxxx	tCCCTGAGACCtaacttgt	--	PREDICTED: basic salivary proline-rich protein 1-like isoform X2 [Bos indicus]	-	-	-	-	GO:0031224//intrinsic component of membrane;GO:0044421//extracellular region part	GO:0043169//cation binding;GO:0060089//molecular transducer activity	GO:0007162//negative regulation of cell adhesion;GO:0007169//transmembrane receptor protein tyrosine kinase signaling pathway;GO:0007606//sensory perception of chemical stimulus;GO:0010596//negative regulation of endothelial cell migration;GO:0045765//regulation of angiogenesis;GO:0048869//cellular developmental process;GO:0050922//negative regulation of chemotaxis	--
lin-4-z	MSTRG.4101	677	696	-18.92	aGGGACTCGGCGAgactgtc	x|||||||x|x||xxxxxxx	tCCCTGAGAC-CTaacttgt	--	-	-	-	-	-	-	-	-	--
lin-4-z	MSTRG.6530	218	236	-14.56	cGGGACTCCTAATTCGAgg	x|||||||xxx|||x:|xx	tCCCTGAGACCTAACTTgt	--	-	-	-	-	-	-	-	-	--
lin-4-z	MSTRG.9831	637	655	-16.9	gGGGACTCgaagacgagac	x|||||||xxxxxxxxxxx	tCCCTGAGacctaacttgt	Arc	PREDICTED: LOW QUALITY PROTEIN: activity-regulated cytoskeleton-associated protein [Bos mutus]	Human Diseases	Substance dependence	ko05031//Amphetamine addiction	K15867	GO:0005856//cytoskeleton;GO:0030141//secretory granule;GO:0044309//neuron spine;GO:0097060//synaptic membrane	GO:0005488//binding	GO:0003002//regionalization;GO:0006996//organelle organization;GO:0007611//learning or memory;GO:0009888//tissue development;GO:0016192//vesicle-mediated transport;GO:0022603//regulation of anatomical structure morphogenesis;GO:0032414//positive regulation of ion transmembrane transporter activity;GO:0048167//regulation of synaptic plasticity;GO:0048870//cell motility	--
miR-3613-x	MSTRG.6869	1695	1716	-15.06	tCAACATGGAGAAGGttctgta	x|||||||:|:||::xxxxxxx	tGTTGTACTTTTTTTtttgttc	ABCC4	multidrug resistance-associated protein 4-like isoform X1 [Bos indicus x Bos taurus]	Environmental Information Processing;Organismal Systems;Environmental Information Processing;Human Diseases	Signal transduction;Digestive system;Membrane transport;Drug resistance: antineoplastic	ko04024//cAMP signaling pathway;ko04976//Bile secretion;ko02010//ABC transporters;ko01523//Antifolate resistance	K05673;K05673;K05673;K05673	GO:0030667//secretory granule membrane;GO:0031224//intrinsic component of membrane	GO:0015405//P-P-bond-hydrolysis-driven transmembrane transporter activity;GO:0016616//oxidoreductase activity, acting on the CH-OH group of donors, NAD or NADP as acceptor;GO:0016887//ATPase activity;GO:0032550//purine ribonucleoside binding	GO:0001775//cell activation;GO:0006811//ion transport;GO:0007599//hemostasis;GO:0008284//positive regulation of cell proliferation;GO:0009719//response to endogenous stimulus;GO:0010033//response to organic substance;GO:0015893//drug transport;GO:0044710//single-organism metabolic process	--
miR-3613-x	MSTRG.6881	136	157	-13.75	aCAACATGTAAGGtccgcaaag	x|||||||x||::xxxxxxxxx	tGTTGTACTTTTTtttttgttc	ABCC4	multidrug resistance-associated protein 4-like [Bos indicus x Bos taurus]	Environmental Information Processing;Organismal Systems;Environmental Information Processing;Human Diseases	Signal transduction;Digestive system;Membrane transport;Drug resistance: antineoplastic	ko04024//cAMP signaling pathway;ko04976//Bile secretion;ko02010//ABC transporters;ko01523//Antifolate resistance	K05673;K05673;K05673;K05673	GO:0030667//secretory granule membrane;GO:0031224//intrinsic component of membrane	GO:0015405//P-P-bond-hydrolysis-driven transmembrane transporter activity;GO:0016616//oxidoreductase activity, acting on the CH-OH group of donors, NAD or NADP as acceptor;GO:0017111//nucleoside-triphosphatase activity;GO:0032550//purine ribonucleoside binding	GO:0001775//cell activation;GO:0007599//hemostasis;GO:0008284//positive regulation of cell proliferation;GO:0009719//response to endogenous stimulus;GO:0010033//response to organic substance;GO:0044710//single-organism metabolic process;GO:0051234//establishment of localization	--
miR-3613-x	MSTRG.6886	928	949	-11.57	tCAACATGTAAGGtccgcaaag	x|||||||x||::xxxxxxxxx	tGTTGTACTTTTTtttttgttc	ABCC4	TPA: ATP-binding cassette protein C4-like [Bos taurus]	Environmental Information Processing;Organismal Systems;Environmental Information Processing;Human Diseases	Signal transduction;Digestive system;Membrane transport;Drug resistance: antineoplastic	ko04024//cAMP signaling pathway;ko04976//Bile secretion;ko02010//ABC transporters;ko01523//Antifolate resistance	K05673;K05673;K05673;K05673	GO:0030667//secretory granule membrane;GO:0031224//intrinsic component of membrane	GO:0005253//anion channel activity;GO:0016616//oxidoreductase activity, acting on the CH-OH group of donors, NAD or NADP as acceptor;GO:0032550//purine ribonucleoside binding;GO:0042626//ATPase activity, coupled to transmembrane movement of substances	GO:0001775//cell activation;GO:0006821//chloride transport;GO:0007599//hemostasis;GO:0008284//positive regulation of cell proliferation;GO:0009719//response to endogenous stimulus;GO:0010033//response to organic substance;GO:0044710//single-organism metabolic process	--
miR-122-y	MSTRG.1998	1255	1275	-17.38	gTGTGGTACCAGTactggaag	x|||||||x||||xxxxxxxx	aACACCATTGTCAcactccac	DACT2	dapper homolog 2 [Bos indicus x Bos taurus]	-	-	-	-	GO:0043231//intracellular membrane-bounded organelle	GO:0019901//protein kinase binding	GO:0000904//cell morphogenesis involved in differentiation;GO:0007155//cell adhesion;GO:0032926//negative regulation of activin receptor signaling pathway;GO:0072044//collecting duct development	--
miR-122-y	MSTRG.29222	565	583	-20.24	cTGTGGTA-CAG-GTAAGGga	x|||||||x|||x||x|||xx	aACACCATTGTCACACTCCac	--	serine/arginine repetitive matrix protein 1-like [Zalophus californianus]	-	-	-	-	GO:0042579//microbody	GO:0005515//protein binding;GO:0016647//oxidoreductase activity, acting on the CH-NH group of donors, oxygen as acceptor	GO:0006596//polyamine biosynthetic process;GO:0006598//polyamine catabolic process;GO:0031328//positive regulation of cellular biosynthetic process;GO:0044710//single-organism metabolic process;GO:0051234//establishment of localization	--
miR-122-y	MSTRG.33557	1179	1199	-19.2	cTGTGGTAA-AGTAGTCGGtgt	x||||||||x|||x||x:|xxx	aACACCATTGTCA-CACTCcac	ARHGAP6	rho GTPase-activating protein 6 isoform X2 [Bos indicus x Bos taurus]	-	-	-	-	GO:0015629//actin cytoskeleton;GO:0044444//cytoplasmic part	GO:0019899//enzyme binding;GO:0019904//protein domain specific binding;GO:0030674//protein binding, bridging;GO:0060229//lipase activator activity	GO:0001953//negative regulation of cell-matrix adhesion;GO:0007045//cell-substrate adherens junction assembly;GO:0008154//actin polymerization or depolymerization;GO:0010863//positive regulation of phospholipase C activity;GO:0032232//negative regulation of actin filament bundle assembly;GO:0043087//regulation of GTPase activity	--
miR-122-y	MSTRG.4090	5175	5195	-18.6	gTGTGGTAAGTGTGTGtaagt	x||||||||xx|||||xxxxx	aACACCATTGTCACACtccac	--	PREDICTED: basic salivary proline-rich protein 1-like isoform X2 [Bos indicus]	-	-	-	-	GO:0031224//intrinsic component of membrane;GO:0044421//extracellular region part	GO:0043169//cation binding;GO:0060089//molecular transducer activity	GO:0007162//negative regulation of cell adhesion;GO:0007169//transmembrane receptor protein tyrosine kinase signaling pathway;GO:0007606//sensory perception of chemical stimulus;GO:0010596//negative regulation of endothelial cell migration;GO:0045765//regulation of angiogenesis;GO:0048869//cellular developmental process;GO:0050922//negative regulation of chemotaxis	--
miR-873-x	MSTRG.15958	4301	4324	-22.1	aCGTCCTTCCTGGACTCTGAGccc	x|||||||xxx|:||x||x||xxx	tGCAGGAA---CTTGTGAGTCtcc	--	-	-	-	-	-	-	-	-	--
miR-873-x	MSTRG.21507	2458	2478	-11.49	cCGTCCTTcttgtcgtggatg	x|||||||xxxxxxxxxxxxx	tGCAGGAActtgtgagtctcc	Slc29a2	equilibrative nucleoside transporter 2 isoform X2 [Bos taurus]	Human Diseases	Substance dependence	ko05034//Alcoholism	K15014	GO:0016021//integral component of membrane;GO:0031090//organelle membrane;GO:0043231//intracellular membrane-bounded organelle;GO:0043232//intracellular non-membrane-bounded organelle	GO:0015932//nucleobase-containing compound transmembrane transporter activity	GO:0006725//cellular aromatic compound metabolic process;GO:0006863//purine nucleobase transport;GO:0007589//body fluid secretion;GO:0015855//pyrimidine nucleobase transport;GO:0015864//pyrimidine nucleoside transport;GO:0032868//response to insulin;GO:0044763//single-organism cellular process	--
miR-873-x	MSTRG.2728	501	520	-14.03	tCGTCCTTTCTC-CTCTGtcg	x|||||||xxx|x|||x|xxx	tGCAGGAACTTGTGAGTCtcc	--	-	-	-	-	-	-	-	-	--
miR-873-x	MSTRG.3753	1073	1092	-13.44	tCGTCCTTCGTTGA-CAGAtt	x|||||||x:x::xx||||xx	tGCAGGAACTTGTGAGTCTcc	WAC	WW domain-containing adapter protein with coiled-coil isoform X2 [Bos taurus]	-	-	-	-	GO:0016604//nuclear body;GO:0030529//intracellular ribonucleoprotein complex	GO:0001099//basal RNA polymerase II transcription machinery binding	GO:0000077//DNA damage checkpoint;GO:0006355//regulation of transcription, DNA-templated;GO:0006513//protein monoubiquitination;GO:0010508//positive regulation of autophagy;GO:0031330//negative regulation of cellular catabolic process;GO:0033523//histone H2B ubiquitination	--
miR-873-x	MSTRG.4478	4551	4567	-14.35	cCGTCCTT---C-TTCGGAag	x|||||||xxx|x:||:||xx	tGCAGGAACTTGTGAGTCTcc	F52C9.6	endonuclease-reverse transcriptase [Babesia ovata]	-	-	-	-	-	-	-	--
miR-873-x	MSTRG.5822	1035	1052	-19.42	aCGTCCTT-AAT-C-CAGGgt	x|||||||x||:x|x|||:xx	tGCAGGAACTTGTGAGTCTcc	--	-	-	-	-	-	-	-	-	--
miR-873-x	MSTRG.9567	607	626	-16.69	cCGTCCTTCGA-AGGCAGAct	x|||||||x:|x|xx||||xx	tGCAGGAACTTGTGAGTCTcc	AHNAK2	protein AHNAK2 isoform X1 [Bos indicus x Bos taurus]	Human Diseases	Infectious disease: bacterial	ko05132//Salmonella infection	K23934	GO:0012506//vesicle membrane;GO:0031674//I band;GO:0044459//plasma membrane part	-	GO:0007009//plasma membrane organization	--
miR-873-x	MSTRG.9896	1461	1481	-23.62	gCGTCCTTACACCGGCGGAcc	x|||||||xx||xxx|:||xx	tGCAGGAACTTGTGAGTCTcc	--	IQ motif and ankyrin repeat domain-containing protein 1 isoform X4 [Cervus canadensis]	-	-	-	-	-	-	-	--
miR-2411-y	MSTRG.13424	478	500	-15.34	aCTTGACATTGGGAaaagttaaa	x|||||||xx:x||xxxxxxxxx	tGAACTGTCTTACTcccacatcc	COBLL1	cordon-bleu protein-like 1 [Bos indicus x Bos taurus]	-	-	-	-	GO:0031988//membrane-bounded vesicle	-	-	--
miR-2411-y	MSTRG.22496	577	601	-15.56	tCTTGACAGCCGTCAGGAGTtgctt	x||||||||xx:|x|||x||xxxxx	tGAACTGTCT-TACTCC-CAcatcc	--	endonuclease-reverse transcriptase [Babesia ovata]	-	-	-	-	GO:0031252//cell leading edge;GO:0070161//anchoring junction	GO:0003779//actin binding;GO:0050839//cell adhesion molecule binding	GO:0010468//regulation of gene expression;GO:0098602//single organism cell adhesion	--
miR-2411-y	MSTRG.31466	1055	1079	-16.21	cCTTGACAATAAAGATTTGTGTAgt	x|||||||xx||x||xxx|||||xx	tGAACTGTC-TTACTCC-CACATcc	LONRF2	LOW QUALITY PROTEIN: LON peptidase N-terminal domain and RING finger protein 2 [Bos taurus]	-	-	-	-	-	GO:0046914//transition metal ion binding	GO:0019538//protein metabolic process	--
miR-877-y	MSTRG.13727	110	131	-26.05	tGGAGAAGCTTGAGGTGGGaag	x|||||||xxx||||x|||xxx	tCCTCTTCTCCCTCCTCCCagt	--	collagen alpha-1(II) chain-like [Bos taurus]	-	-	-	-	-	-	-	--
miR-877-y	MSTRG.15104	556	577	-14.42	gGGAGAAGGaccgtgtccagcg	x|||||||:xxxxxxxxxxxxx	tCCTCTTCTccctcctcccagt	--	PREDICTED: phospholipase A2 inhibitor and Ly6/PLAUR domain-containing protein [Bison bison bison]	-	-	-	-	-	-	-	--
miR-877-y	MSTRG.15630	391	415	-18.53	aGGAGAAGTGCCCCGTGGAGccgtg	x|||||||x|xxxx|x||||xxxxx	tCCTCTTCTCC---CTCCTCccagt	--	protein N-lysine methyltransferase METTL21A isoform X3 [Ovis aries]	-	-	-	-	GO:0031224//intrinsic component of membrane;GO:0044421//extracellular region part	GO:0043169//cation binding;GO:0060089//molecular transducer activity	GO:0007162//negative regulation of cell adhesion;GO:0007169//transmembrane receptor protein tyrosine kinase signaling pathway;GO:0007606//sensory perception of chemical stimulus;GO:0010596//negative regulation of endothelial cell migration;GO:0045765//regulation of angiogenesis;GO:0048869//cellular developmental process;GO:0050922//negative regulation of chemotaxis	--
miR-877-y	MSTRG.15669	398	419	-25.93	cGGAGAAGAAGGAGCAGCGgcg	x||||||||x||||x||x|xxx	tCCTCTTCTCCCTCCTCCCagt	--	-	-	-	-	-	-	-	-	--
miR-877-y	MSTRG.20070	243	264	-15.32	aGGAGAAGAcaactaaaatgtc	x||||||||xxxxxxxxxxxxx	tCCTCTTCTccctcctcccagt	CCNG1	TPA: cyclin-G1-like [Bos taurus]	Human Diseases;Cellular Processes	Cancer: overview;Cell growth and death	ko05206//MicroRNAs in cancer;ko04115//p53 signaling pathway	K10145;K10145	GO:0043005//neuron projection;GO:0043231//intracellular membrane-bounded organelle;GO:0044297//cell body;GO:0044444//cytoplasmic part	GO:0005515//protein binding	GO:0000280//nuclear division;GO:0007417//central nervous system development;GO:0009719//response to endogenous stimulus;GO:0031572//G2 DNA damage checkpoint;GO:0040007//growth;GO:0042981//regulation of apoptotic process;GO:0048646//anatomical structure formation involved in morphogenesis;GO:0051726//regulation of cell cycle	--
miR-877-y	MSTRG.20582	155	176	-21.12	gGGAGAAGGGCTATCGGGccgg	x|||||||:|xx|xx:||xxxx	tCCTCTTCTCCCTCCTCCcagt	--	-	-	-	-	-	-	-	-	--
miR-877-y	MSTRG.29222	8600	8621	-15.98	cGGAGAAGAGacccttatcaaa	x|||||||||xxxxxxxxxxxx	tCCTCTTCTCcctcctcccagt	--	serine/arginine repetitive matrix protein 1-like [Zalophus californianus]	-	-	-	-	GO:0042579//microbody	GO:0005515//protein binding;GO:0016647//oxidoreductase activity, acting on the CH-NH group of donors, oxygen as acceptor	GO:0006596//polyamine biosynthetic process;GO:0006598//polyamine catabolic process;GO:0031328//positive regulation of cellular biosynthetic process;GO:0044710//single-organism metabolic process;GO:0051234//establishment of localization	--
miR-877-y	MSTRG.31308	244	266	-28.9	cGGAGAAGATGGGAGGActagac	x||||||||x|||||||xxxxxx	tCCTCTTCT-CCCTCCTcccagt	--	hornerin-like, partial [Bos taurus]	-	-	-	-	-	-	-	--
miR-877-y	MSTRG.31466	1099	1120	-14.47	aGGAGAAGTGtcacattcgagt	x|||||||x|xxxxxxxxxxxx	tCCTCTTCTCcctcctcccagt	LONRF2	LOW QUALITY PROTEIN: LON peptidase N-terminal domain and RING finger protein 2 [Bos taurus]	-	-	-	-	-	GO:0046914//transition metal ion binding	GO:0019538//protein metabolic process	--
miR-877-y	MSTRG.33557	433	453	-18.13	gGGAGAAGGTCGAG-AGccttg	x|||||||:xx|||x||xxxxx	tCCTCTTCTCCCTCCTCccagt	ARHGAP6	rho GTPase-activating protein 6 isoform X2 [Bos indicus x Bos taurus]	-	-	-	-	GO:0015629//actin cytoskeleton;GO:0044444//cytoplasmic part	GO:0019899//enzyme binding;GO:0019904//protein domain specific binding;GO:0030674//protein binding, bridging;GO:0060229//lipase activator activity	GO:0001953//negative regulation of cell-matrix adhesion;GO:0007045//cell-substrate adherens junction assembly;GO:0008154//actin polymerization or depolymerization;GO:0010863//positive regulation of phospholipase C activity;GO:0032232//negative regulation of actin filament bundle assembly;GO:0043087//regulation of GTPase activity	--
miR-877-y	MSTRG.4090	3556	3581	-27.65	tGGAGAAGAGGAGCAAAGAGAGGTgc	x||||||||||x|xx|x|||x|||xx	tCCTCTTCTCC-C--TCCTC-CCAgt	--	PREDICTED: basic salivary proline-rich protein 1-like isoform X2 [Bos indicus]	-	-	-	-	GO:0031224//intrinsic component of membrane;GO:0044421//extracellular region part	GO:0043169//cation binding;GO:0060089//molecular transducer activity	GO:0007162//negative regulation of cell adhesion;GO:0007169//transmembrane receptor protein tyrosine kinase signaling pathway;GO:0007606//sensory perception of chemical stimulus;GO:0010596//negative regulation of endothelial cell migration;GO:0045765//regulation of angiogenesis;GO:0048869//cellular developmental process;GO:0050922//negative regulation of chemotaxis	--
miR-877-y	MSTRG.6869	1689	1710	-15.4	tGGAGAAGGTTCTGTAAGGTgt	x|||||||:xxxx|x|x|||xx	tCCTCTTCTCCCTCCTCCCAgt	ABCC4	multidrug resistance-associated protein 4-like isoform X1 [Bos indicus x Bos taurus]	Environmental Information Processing;Organismal Systems;Environmental Information Processing;Human Diseases	Signal transduction;Digestive system;Membrane transport;Drug resistance: antineoplastic	ko04024//cAMP signaling pathway;ko04976//Bile secretion;ko02010//ABC transporters;ko01523//Antifolate resistance	K05673;K05673;K05673;K05673	GO:0030667//secretory granule membrane;GO:0031224//intrinsic component of membrane	GO:0015405//P-P-bond-hydrolysis-driven transmembrane transporter activity;GO:0016616//oxidoreductase activity, acting on the CH-OH group of donors, NAD or NADP as acceptor;GO:0016887//ATPase activity;GO:0032550//purine ribonucleoside binding	GO:0001775//cell activation;GO:0006811//ion transport;GO:0007599//hemostasis;GO:0008284//positive regulation of cell proliferation;GO:0009719//response to endogenous stimulus;GO:0010033//response to organic substance;GO:0015893//drug transport;GO:0044710//single-organism metabolic process	--
miR-877-y	MSTRG.6877	151	172	-16.37	tGGAGAAGATTCCGTAAGGTgt	x||||||||xxxx|x|x|||xx	tCCTCTTCTCCCTCCTCCCAgt	ABCC4	multidrug resistance-associated protein 4-like isoform X6 [Bos taurus]	Environmental Information Processing;Organismal Systems;Environmental Information Processing;Human Diseases	Signal transduction;Digestive system;Membrane transport;Drug resistance: antineoplastic	ko04024//cAMP signaling pathway;ko04976//Bile secretion;ko02010//ABC transporters;ko01523//Antifolate resistance	K05673;K05673;K05673;K05673	GO:0030667//secretory granule membrane;GO:0031224//intrinsic component of membrane	GO:0005253//anion channel activity;GO:0016616//oxidoreductase activity, acting on the CH-OH group of donors, NAD or NADP as acceptor;GO:0032550//purine ribonucleoside binding;GO:0042626//ATPase activity, coupled to transmembrane movement of substances	GO:0001775//cell activation;GO:0006821//chloride transport;GO:0007599//hemostasis;GO:0008284//positive regulation of cell proliferation;GO:0009719//response to endogenous stimulus;GO:0010033//response to organic substance;GO:0044710//single-organism metabolic process	--
miR-877-y	MSTRG.9831	165	186	-13.85	cGGAGAAGGAGtcgcccgccca	x|||||||:x|xxxxxxxxxxx	tCCTCTTCTCCctcctcccagt	Arc	PREDICTED: LOW QUALITY PROTEIN: activity-regulated cytoskeleton-associated protein [Bos mutus]	Human Diseases	Substance dependence	ko05031//Amphetamine addiction	K15867	GO:0005856//cytoskeleton;GO:0030141//secretory granule;GO:0044309//neuron spine;GO:0097060//synaptic membrane	GO:0005488//binding	GO:0003002//regionalization;GO:0006996//organelle organization;GO:0007611//learning or memory;GO:0009888//tissue development;GO:0016192//vesicle-mediated transport;GO:0022603//regulation of anatomical structure morphogenesis;GO:0032414//positive regulation of ion transmembrane transporter activity;GO:0048167//regulation of synaptic plasticity;GO:0048870//cell motility	--
miR-486-y	MSTRG.16811	417	438	-16.77	tCCCCGTCcccttctccactcg	x|||||||xxxxxxxxxxxxxx	cGGGGCAGctcagtacaggatg	--	TPR and ankyrin repeat-containing protein 1 isoform X3 [Bos taurus]	-	-	-	-	-	GO:0003824//catalytic activity	-	--
miR-486-y	MSTRG.17500	512	534	-17.86	tCCCCGTCACAGAGGTGGCggcc	x|||||||xx||xx:||x|xxxx	cGGGGCAGC-TCAGTACAGgatg	C4B	complement C4 isoform X1 [Bos taurus]	Human Diseases;Human Diseases;Organismal Systems;Human Diseases	Immune disease;Infectious disease: bacterial;Immune system;Infectious disease: bacterial	ko05322//Systemic lupus erythematosus;ko05150//Staphylococcus aureus infection;ko04610//Complement and coagulation cascades;ko05133//Pertussis	K03989;K03989;K03989;K03989	GO:0016020//membrane;GO:0031988//membrane-bounded vesicle;GO:0044217//other organism part	GO:0001846//opsonin binding;GO:0061135//endopeptidase regulator activity	GO:0002237//response to molecule of bacterial origin;GO:0002673//regulation of acute inflammatory response;GO:0006956//complement activation;GO:0010466//negative regulation of peptidase activity;GO:0019724//B cell mediated immunity;GO:0043277//apoptotic cell clearance	--
miR-486-y	MSTRG.21507	860	884	-27.03	aCCCCGTCCGAGTCCATCGTgtgct	x|||||||x|||||x||x||xxxxx	cGGGGCAG-CTCAG-TA-CAggatg	Slc29a2	equilibrative nucleoside transporter 2 isoform X2 [Bos taurus]	Human Diseases	Substance dependence	ko05034//Alcoholism	K15014	GO:0016021//integral component of membrane;GO:0031090//organelle membrane;GO:0043231//intracellular membrane-bounded organelle;GO:0043232//intracellular non-membrane-bounded organelle	GO:0015932//nucleobase-containing compound transmembrane transporter activity	GO:0006725//cellular aromatic compound metabolic process;GO:0006863//purine nucleobase transport;GO:0007589//body fluid secretion;GO:0015855//pyrimidine nucleobase transport;GO:0015864//pyrimidine nucleoside transport;GO:0032868//response to insulin;GO:0044763//single-organism cellular process	--
miR-486-y	MSTRG.3598	80	101	-22.6	gCCCCGTCGccgccccaacccc	x||||||||xxxxxxxxxxxxx	cGGGGCAGCtcagtacaggatg	OPTN	PREDICTED: optineurin isoform X2 [Bos mutus]	Cellular Processes	Transport and catabolism	ko04137//Mitophagy - animal	K19946	-	-	-	--
miR-486-y	MSTRG.4478	344	363	-21.17	tCCCCGTCC--TTTTGTCCccg	x|||||||xxx|:x|||||xxx	cGGGGCAGCTCAGTACAGGatg	F52C9.6	endonuclease-reverse transcriptase [Babesia ovata]	-	-	-	-	-	-	-	--
miR-486-y	MSTRG.6892	105	130	-32.86	gCCCCGTCGAGGGGGTCGTCTCGTgc	x||||||||||xxxx||:|x||x|xx	cGGGGCAGCTC----AGTACAGGAtg	ABCC4	multidrug resistance-associated protein 4 [Bos taurus]	Environmental Information Processing;Organismal Systems;Environmental Information Processing;Human Diseases	Signal transduction;Digestive system;Membrane transport;Drug resistance: antineoplastic	ko04024//cAMP signaling pathway;ko04976//Bile secretion;ko02010//ABC transporters;ko01523//Antifolate resistance	K05673;K05673;K05673;K05673	GO:0030667//secretory granule membrane;GO:0031224//intrinsic component of membrane	GO:0015405//P-P-bond-hydrolysis-driven transmembrane transporter activity;GO:0016616//oxidoreductase activity, acting on the CH-OH group of donors, NAD or NADP as acceptor;GO:0017111//nucleoside-triphosphatase activity;GO:0032550//purine ribonucleoside binding	GO:0001775//cell activation;GO:0006821//chloride transport;GO:0007599//hemostasis;GO:0008284//positive regulation of cell proliferation;GO:0009719//response to endogenous stimulus;GO:0010033//response to organic substance;GO:0044710//single-organism metabolic process	--
miR-486-y	MSTRG.7032	732	754	-24.89	gCCCCGTCGACGACATCTggggt	x|||||||||x|x|||x|xxxxx	cGGGGCAGCT-CAGTACAggatg	--	arf-GAP with dual PH domain-containing protein 2 isoform X1 [Cervus canadensis]	-	-	-	-	-	GO:0016647//oxidoreductase activity, acting on the CH-NH group of donors, oxygen as acceptor	GO:0006598//polyamine catabolic process;GO:0010467//gene expression;GO:0044238//primary metabolic process;GO:0044271//cellular nitrogen compound biosynthetic process;GO:1901576//organic substance biosynthetic process	--
miR-486-y	MSTRG.9563	3258	3279	-17.02	cCCCCGTCGCGAAATaaatatc	x||||||||x|xx||xxxxxxx	cGGGGCAGCTCAGTAcaggatg	AHNAK2	PREDICTED: protein AHNAK2 [Bos mutus]	Human Diseases	Infectious disease: bacterial	ko05132//Salmonella infection	K23934	GO:0012506//vesicle membrane;GO:0031674//I band;GO:0044459//plasma membrane part	-	GO:0007009//plasma membrane organization	--
miR-211-x	MSTRG.15958	4281	4301	-11.67	cAGGGAAAGTGACCGGTACcg	x|||||||xx|xxx|:x||xx	tTCCCTTTGTCATCCTTTGcc	--	-	-	-	-	-	-	-	-	--
miR-211-x	MSTRG.17502	637	657	-12.16	aAGGGAAAAGATGTGCACCtt	x|||||||x:x|:x|x|x|xx	tTCCCTTTGTCATCCTTTGcc	C4A	PREDICTED: complement C4-B-like isoform X1 [Bison bison bison]	Human Diseases;Human Diseases;Organismal Systems;Human Diseases	Immune disease;Infectious disease: bacterial;Immune system;Infectious disease: bacterial	ko05322//Systemic lupus erythematosus;ko05150//Staphylococcus aureus infection;ko04610//Complement and coagulation cascades;ko05133//Pertussis	K03989;K03989;K03989;K03989	GO:0016020//membrane;GO:0031988//membrane-bounded vesicle;GO:0044217//other organism part	GO:0001846//opsonin binding;GO:0061135//endopeptidase regulator activity	GO:0002237//response to molecule of bacterial origin;GO:0002673//regulation of acute inflammatory response;GO:0006956//complement activation;GO:0010466//negative regulation of peptidase activity;GO:0019724//B cell mediated immunity;GO:0043277//apoptotic cell clearance	--
miR-211-x	MSTRG.4478	1116	1136	-15.76	tAGGGAAACGGctgtttccag	x||||||||:|xxxxxxxxxx	tTCCCTTTGTCatcctttgcc	F52C9.6	endonuclease-reverse transcriptase [Babesia ovata]	-	-	-	-	-	-	-	--
miR-211-x	MSTRG.8786	618	638	-15.65	gAGGGAAAAAGGAcattccag	x|||||||x||x|xxxxxxxx	tTCCCTTTGTCATcctttgcc	gag	PREDICTED: LOW QUALITY PROTEIN: endogenous retrovirus group K member 7 Gag polyprotein-like [Bos mutus]	-	-	-	-	-	GO:0031779//melanocortin receptor binding	GO:0006725//cellular aromatic compound metabolic process;GO:0033059//cellular pigmentation;GO:0065007//biological regulation;GO:1901360//organic cyclic compound metabolic process	--
miR-351-x	MSTRG.1213	2281	2300	-21.28	aGGGACTCCACGtcgttccg	x||||||||x||xxxxxxxx	tCCCTGAGGAGCcctttgag	--	-	-	-	-	-	-	-	-	--
miR-351-x	MSTRG.15958	218	237	-24.46	aGGGACTCCTTCGacgcgtc	x|||||||||:x|xxxxxxx	tCCCTGAGGAGCCctttgag	--	-	-	-	-	-	-	-	-	--
miR-351-x	MSTRG.18722	964	983	-20.7	gGGGACTCGTGTGGtgcagt	x|||||||x|xx||xxxxxx	tCCCTGAGGAGCCCtttgag	DMBT1	PREDICTED: deleted in malignant brain tumors 1 protein isoform X6 [Bison bison bison]	Organismal Systems	Digestive system	ko04970//Salivary secretion	K13912	GO:0030666//endocytic vesicle membrane;GO:0030667//secretory granule membrane;GO:0031012//extracellular matrix;GO:0044421//extracellular region part;GO:0044425//membrane part	GO:0019899//enzyme binding;GO:0038023//signaling receptor activity;GO:0038024//cargo receptor activity	GO:0001701//in utero embryonic development;GO:0002758//innate immune response-activating signal transduction;GO:0006897//endocytosis;GO:0008283//cell proliferation;GO:0019731//antibacterial humoral response;GO:0030856//regulation of epithelial cell differentiation	--
miR-351-x	MSTRG.3598	1568	1587	-22.84	cGGGACTCCTGTCGGTACca	x|||||||||xxx|:x||xx	tCCCTGAGGAGCCCTTTGag	OPTN	PREDICTED: optineurin isoform X2 [Bos mutus]	Cellular Processes	Transport and catabolism	ko04137//Mitophagy - animal	K19946	-	-	-	--
miR-351-x	MSTRG.4478	4635	4654	-20.73	cGGGACTCTTCcatctcctt	x|||||||:||xxxxxxxxx	tCCCTGAGGAGccctttgag	F52C9.6	endonuclease-reverse transcriptase [Babesia ovata]	-	-	-	-	-	-	-	--
miR-351-x	MSTRG.9563	16	35	-17.09	gGGGACTCGTAGCGAcccct	x|||||||x|x|x||xxxxx	tCCCTGAGGAGCCCTttgag	AHNAK2	PREDICTED: protein AHNAK2 [Bos mutus]	Human Diseases	Infectious disease: bacterial	ko05132//Salmonella infection	K23934	GO:0012506//vesicle membrane;GO:0031674//I band;GO:0044459//plasma membrane part	-	GO:0007009//plasma membrane organization	--
miR-351-x	MSTRG.9567	1286	1304	-25.29	gGGGACTCA-CAGGAGGCgc	x|||||||xx|x|||::|xx	tCCCTGAGGAGCCCTTTGag	AHNAK2	protein AHNAK2 isoform X1 [Bos indicus x Bos taurus]	Human Diseases	Infectious disease: bacterial	ko05132//Salmonella infection	K23934	GO:0012506//vesicle membrane;GO:0031674//I band;GO:0044459//plasma membrane part	-	GO:0007009//plasma membrane organization	--
miR-216-x	MSTRG.18801	1599	1620	-13.51	cTTAGAGTCAAagacgtcagtc	x||||||||x|xxxxxxxxxxx	tAATCTCAGCTggcaactgtga	MKI67	PREDICTED: antigen KI-67 [Bos mutus]	-	-	-	-	GO:0005694//chromosome;GO:0043231//intracellular membrane-bounded organelle	GO:0003723//RNA binding;GO:0005515//protein binding;GO:0036094//small molecule binding	GO:0000280//nuclear division;GO:0009408//response to heat;GO:0010033//response to organic substance;GO:0031099//regeneration;GO:0044260//cellular macromolecule metabolic process;GO:0044763//single-organism cellular process;GO:1903510//mucopolysaccharide metabolic process	--
miR-216-x	MSTRG.31466	945	965	-18.33	aTTAGAGTACAA-GTTGTCAta	x|||||||xx|xx||||x||xx	tAATCTCAGCTGGCAACTGTga	LONRF2	LOW QUALITY PROTEIN: LON peptidase N-terminal domain and RING finger protein 2 [Bos taurus]	-	-	-	-	-	GO:0046914//transition metal ion binding	GO:0019538//protein metabolic process	--
miR-216-x	MSTRG.5784	811	834	-25.77	tTTAGAGTCGACTGGTTCGGCcat	x|||||||||||:|x||x|:|xxx	tAATCTCAGCTGGC-AA-CTGtga	SETMAR	mariner transposase [Homo sapiens]	Metabolism;Metabolism	Global and overview maps;Amino acid metabolism	ko01100//Metabolic pathways;ko00310//Lysine degradation	K11433;K11433	GO:0005634//nucleus;GO:0030139//endocytic vesicle;GO:0031224//intrinsic component of membrane;GO:0042995//cell projection;GO:0044427//chromosomal part	GO:0004520//endodeoxyribonuclease activity;GO:0018024//histone-lysine N-methyltransferase activity;GO:0019899//enzyme binding;GO:0043566//structure-specific DNA binding;GO:0046983//protein dimerization activity	GO:0006282//regulation of DNA repair;GO:0006303//double-strand break repair via nonhomologous end joining;GO:0006308//DNA catabolic process;GO:0007041//lysosomal transport;GO:0007093//mitotic cell cycle checkpoint;GO:0010452//histone H3-K36 methylation;GO:0010912//positive regulation of isomerase activity;GO:0010948//negative regulation of cell cycle process;GO:0016050//vesicle organization;GO:00…	--
miR-7857-y	MSTRG.15288	130	148	-13.14	aAACAAGAAG--GGTCCtcag	x|||||||x|xx||x||xxxx	aTTGTTCTCCAACCTGGctct	ZFP30	LOW QUALITY PROTEIN: zinc finger protein 30 [Ovis aries]	Human Diseases	Infectious disease: viral	ko05168//Herpes simplex virus 1 infection	K09228	-	-	-	--
miR-7857-y	MSTRG.1906	32	51	-15.1	tAACAAGAC-TCGGAGCCAgt	x|||||||xx|x|||x|x|xx	aTTGTTCTCCAACCTGGCTct	UQCRC2	cytochrome b-c1 complex subunit 2, mitochondrial [Bos taurus]	Metabolism;Human Diseases;Human Diseases;Organismal Systems;Human Diseases;Metabolism;Human Diseases;Organismal Systems	Global and overview maps;Neurodegenerative disease;Neurodegenerative disease;Environmental adaptation;Endocrine and metabolic disease;Energy metabolism;Neurodegenerative disease;Circulatory system	ko01100//Metabolic pathways;ko05010//Alzheimer disease;ko05016//Huntington disease;ko04714//Thermogenesis;ko04932//Non-alcoholic fatty liver disease;ko00190//Oxidative phosphorylation;ko05012//Parkinson disease;ko04260//Cardiac muscle contraction	K00415;K00415;K00415;K00415;K00415;K00415;K00415;K00415	GO:0019866//organelle inner membrane;GO:0031988//membrane-bounded vesicle;GO:0044455//mitochondrial membrane part	GO:0004175//endopeptidase activity;GO:0005515//protein binding;GO:0043169//cation binding	GO:0019538//protein metabolic process;GO:0022900//electron transport chain;GO:0045333//cellular respiration;GO:0051234//establishment of localization	--
miR-7857-y	MSTRG.6482	364	385	-14.33	tAACAAGACGGATaatgccttg	x|||||||x||x|xxxxxxxxx	aTTGTTCT-CCAAcctggctct	--	Collagen alpha-1(XXI) chain [Varanus komodoensis]	-	-	-	-	GO:0016020//membrane	-	-	--
miR-11976-z	MSTRG.15669	147	164	-34.74	gCGCCCGCCCCGCCCgcc	x||||||||x||x||xxx	cGCGGGCGGCGCCGGggc	--	-	-	-	-	-	-	-	-	--
miR-11976-z	MSTRG.1998	965	983	-23.61	aCGCCCGCGCCCGtaggac	x|||||||x|x||xxxxxx	cGCGGGCG-GCGCcggggc	DACT2	dapper homolog 2 [Bos indicus x Bos taurus]	-	-	-	-	GO:0043231//intracellular membrane-bounded organelle	GO:0019901//protein kinase binding	GO:0000904//cell morphogenesis involved in differentiation;GO:0007155//cell adhesion;GO:0032926//negative regulation of activin receptor signaling pathway;GO:0072044//collecting duct development	--
miR-11976-z	MSTRG.21179	1368	1384	-34.88	aCGCCCGCC-CGCCCCgg	x||||||||x||x|||xx	cGCGGGCGGCGCCGGGgc	--	LOW QUALITY PROTEIN: collagen alpha-1(IV) chain-like [Phocoena sinus]	-	-	-	-	-	-	-	--
miR-11976-z	MSTRG.29222	70	90	-33.98	cCGCCCGCCGCCCGGGCTCtc	x||||||||||xxx|||:|xx	cGCGGGCGGCG---CCGGGgc	--	serine/arginine repetitive matrix protein 1-like [Zalophus californianus]	-	-	-	-	GO:0042579//microbody	GO:0005515//protein binding;GO:0016647//oxidoreductase activity, acting on the CH-NH group of donors, oxygen as acceptor	GO:0006596//polyamine biosynthetic process;GO:0006598//polyamine catabolic process;GO:0031328//positive regulation of cellular biosynthetic process;GO:0044710//single-organism metabolic process;GO:0051234//establishment of localization	--
miR-11976-z	MSTRG.29423	1264	1281	-24.51	cCGCCCGCgtcctcggga	x|||||||xxxxxxxxxx	cGCGGGCGgcgccggggc	FBN3	fibrillin-3 [Bos taurus]	-	-	-	-	-	-	GO:0007507//heart development;GO:0009887//organ morphogenesis;GO:0009987//cellular process	--
miR-11976-z	MSTRG.4090	14053	14072	-31.53	gCGCCCGCAGGTCGGACCgt	x|||||||x|xx|||x||xx	cGCGGGCGGC--GCCGGGgc	--	PREDICTED: basic salivary proline-rich protein 1-like isoform X2 [Bos indicus]	-	-	-	-	GO:0031224//intrinsic component of membrane;GO:0044421//extracellular region part	GO:0043169//cation binding;GO:0060089//molecular transducer activity	GO:0007162//negative regulation of cell adhesion;GO:0007169//transmembrane receptor protein tyrosine kinase signaling pathway;GO:0007606//sensory perception of chemical stimulus;GO:0010596//negative regulation of endothelial cell migration;GO:0045765//regulation of angiogenesis;GO:0048869//cellular developmental process;GO:0050922//negative regulation of chemotaxis	--
miR-11976-z	MSTRG.6690	182	201	-33.98	gCGCCCGCCTCCGGGACCac	x||||||||x|xx||x||xx	cGCGGGCGGCG--CCGGGgc	--	uncharacterized protein LOC113906999 [Bos indicus x Bos taurus]	-	-	-	-	-	-	-	--
miR-11976-z	MSTRG.7424	246	262	-32.88	tCGCCCGCC-CGGCCgtg	x||||||||x|||||xxx	cGCGGGCGGCGCCGGggc	--	PREDICTED: gametogenetin-like [Capra hircus]	-	-	-	-	-	-	-	--
miR-11976-z	MSTRG.9421	1090	1107	-24.1	aCGCCCGCTTCCTCCgtc	x|||||||:x|xx||xxx	cGCGGGCGGCGCCGGggc	--	thymocyte nuclear protein 1 isoform X2 [Odocoileus virginianus texanus]	-	-	-	-	-	-	-	--
miR-11976-z	MSTRG.9831	159	175	-29.11	tCGCCCGCC-CACCCCcg	x||||||||x|xx|||xx	cGCGGGCGGCGCCGGGgc	Arc	PREDICTED: LOW QUALITY PROTEIN: activity-regulated cytoskeleton-associated protein [Bos mutus]	Human Diseases	Substance dependence	ko05031//Amphetamine addiction	K15867	GO:0005856//cytoskeleton;GO:0030141//secretory granule;GO:0044309//neuron spine;GO:0097060//synaptic membrane	GO:0005488//binding	GO:0003002//regionalization;GO:0006996//organelle organization;GO:0007611//learning or memory;GO:0009888//tissue development;GO:0016192//vesicle-mediated transport;GO:0022603//regulation of anatomical structure morphogenesis;GO:0032414//positive regulation of ion transmembrane transporter activity;GO:0048167//regulation of synaptic plasticity;GO:0048870//cell motility	--
miR-1307-z	MSTRG.14602	177	204	-32.81	aGAGCCGCGTCCGACCGTTTGCGCTccg	x|||||||:x|||x|x|::x||:|:xxx	aCTCGGCGT-GGC-GTCGGTCGTGGaat	ZNF671	zinc finger protein 28 homolog [Zalophus californianus]	Human Diseases	Infectious disease: viral	ko05168//Herpes simplex virus 1 infection	K09228	-	-	-	--
miR-1307-z	MSTRG.1998	1074	1103	-33.2	tGAGCCGCAGGGGCTTCGCCGACCACCaca	x||||||||xxxx|:x|:x|x|x||||xxx	aCTCGGCGT----GGCGTCGGTCGTGGaat	DACT2	dapper homolog 2 [Bos indicus x Bos taurus]	-	-	-	-	GO:0043231//intracellular membrane-bounded organelle	GO:0019901//protein kinase binding	GO:0000904//cell morphogenesis involved in differentiation;GO:0007155//cell adhesion;GO:0032926//negative regulation of activin receptor signaling pathway;GO:0072044//collecting duct development	--
miR-1307-z	MSTRG.33557	455	479	-28.11	aGAGCCGC-CCGACA-CGGACTCCcgg	x|||||||x|||x||x|x:x|x||xxx	aCTCGGCGTGGC-GTCGGTCGTGGaat	ARHGAP6	rho GTPase-activating protein 6 isoform X2 [Bos indicus x Bos taurus]	-	-	-	-	GO:0015629//actin cytoskeleton;GO:0044444//cytoplasmic part	GO:0019899//enzyme binding;GO:0019904//protein domain specific binding;GO:0030674//protein binding, bridging;GO:0060229//lipase activator activity	GO:0001953//negative regulation of cell-matrix adhesion;GO:0007045//cell-substrate adherens junction assembly;GO:0008154//actin polymerization or depolymerization;GO:0010863//positive regulation of phospholipase C activity;GO:0032232//negative regulation of actin filament bundle assembly;GO:0043087//regulation of GTPase activity	--
miR-1307-z	MSTRG.4090	4100	4125	-21.58	aGAGCCGCGGGGAAGgactctcgact	x|||||||:xx|x||xxxxxxxxxxx	aCTCGGCGTGGCGTCggtcgtggaat	--	PREDICTED: basic salivary proline-rich protein 1-like isoform X2 [Bos indicus]	-	-	-	-	GO:0031224//intrinsic component of membrane;GO:0044421//extracellular region part	GO:0043169//cation binding;GO:0060089//molecular transducer activity	GO:0007162//negative regulation of cell adhesion;GO:0007169//transmembrane receptor protein tyrosine kinase signaling pathway;GO:0007606//sensory perception of chemical stimulus;GO:0010596//negative regulation of endothelial cell migration;GO:0045765//regulation of angiogenesis;GO:0048869//cellular developmental process;GO:0050922//negative regulation of chemotaxis	--
miR-71-x	MSTRG.15958	1611	1633	-18.85	aCTTTCTGAAGTTTCGTTCCTcc	x|||||||x|xx::|:|:x||xx	tGAAAGACAT--GGGTAGTGAga	--	-	-	-	-	-	-	-	-	--
miR-71-x	MSTRG.4478	3418	3438	-14.28	cCTTTCTGGTATCGGA-ACTga	x|||||||x||:|x:xx|||xx	tGAAAGAC-ATGGGTAGTGAga	F52C9.6	endonuclease-reverse transcriptase [Babesia ovata]	-	-	-	-	-	-	-	--
miR-71-x	MSTRG.7207	943	963	-16.75	tCTTTCTGAATTCAggaactt	x|||||||x|::||xxxxxxx	tGAAAGACATGGGTagtgaga	--	endonuclease-reverse transcriptase [Babesia ovata]	-	-	-	-	GO:0031224//intrinsic component of membrane;GO:0044464//cell part	GO:0043168//anion binding	GO:0044237//cellular metabolic process	--
miR-9995-y	MSTRG.15288	345	362	-17.23	tAGAGACATATTTAAGga	x|||||||:x||xx||xx	aTCTCTGTGGAACCTCca	ZFP30	LOW QUALITY PROTEIN: zinc finger protein 30 [Ovis aries]	Human Diseases	Infectious disease: viral	ko05168//Herpes simplex virus 1 infection	K09228	-	-	-	--
miR-9995-y	MSTRG.31466	1502	1519	-13.98	cAGAGACACTaccaccga	x||||||||:xxxxxxxx	aTCTCTGTGGaacctcca	LONRF2	LOW QUALITY PROTEIN: LON peptidase N-terminal domain and RING finger protein 2 [Bos taurus]	-	-	-	-	-	GO:0046914//transition metal ion binding	GO:0019538//protein metabolic process	--
miR-9995-y	MSTRG.33557	1431	1448	-16.63	aAGAGACATTTTattggt	x|||||||::||xxxxxx	aTCTCTGTGGAAcctcca	ARHGAP6	rho GTPase-activating protein 6 isoform X2 [Bos indicus x Bos taurus]	-	-	-	-	GO:0015629//actin cytoskeleton;GO:0044444//cytoplasmic part	GO:0019899//enzyme binding;GO:0019904//protein domain specific binding;GO:0030674//protein binding, bridging;GO:0060229//lipase activator activity	GO:0001953//negative regulation of cell-matrix adhesion;GO:0007045//cell-substrate adherens junction assembly;GO:0008154//actin polymerization or depolymerization;GO:0010863//positive regulation of phospholipase C activity;GO:0032232//negative regulation of actin filament bundle assembly;GO:0043087//regulation of GTPase activity	--
miR-9995-y	MSTRG.4090	17740	17755	-18.14	tAGAGACAC--TGGAccg	x||||||||xx||||xxx	aTCTCTGTGGAACCTcca	--	PREDICTED: basic salivary proline-rich protein 1-like isoform X2 [Bos indicus]	-	-	-	-	GO:0031224//intrinsic component of membrane;GO:0044421//extracellular region part	GO:0043169//cation binding;GO:0060089//molecular transducer activity	GO:0007162//negative regulation of cell adhesion;GO:0007169//transmembrane receptor protein tyrosine kinase signaling pathway;GO:0007606//sensory perception of chemical stimulus;GO:0010596//negative regulation of endothelial cell migration;GO:0045765//regulation of angiogenesis;GO:0048869//cellular developmental process;GO:0050922//negative regulation of chemotaxis	--
miR-9995-y	MSTRG.4101	255	272	-16.67	cAGAGACACCagaacgtc	x|||||||||xxxxxxxx	aTCTCTGTGGaacctcca	--	-	-	-	-	-	-	-	-	--
miR-9995-y	MSTRG.5784	517	534	-10.03	cAGAGACAACagtcgatc	x|||||||x|xxxxxxxx	aTCTCTGTGGaacctcca	SETMAR	mariner transposase [Homo sapiens]	Metabolism;Metabolism	Global and overview maps;Amino acid metabolism	ko01100//Metabolic pathways;ko00310//Lysine degradation	K11433;K11433	GO:0005634//nucleus;GO:0030139//endocytic vesicle;GO:0031224//intrinsic component of membrane;GO:0042995//cell projection;GO:0044427//chromosomal part	GO:0004520//endodeoxyribonuclease activity;GO:0018024//histone-lysine N-methyltransferase activity;GO:0019899//enzyme binding;GO:0043566//structure-specific DNA binding;GO:0046983//protein dimerization activity	GO:0006282//regulation of DNA repair;GO:0006303//double-strand break repair via nonhomologous end joining;GO:0006308//DNA catabolic process;GO:0007041//lysosomal transport;GO:0007093//mitotic cell cycle checkpoint;GO:0010452//histone H3-K36 methylation;GO:0010912//positive regulation of isomerase activity;GO:0010948//negative regulation of cell cycle process;GO:0016050//vesicle organization;GO:00…	--
miR-9995-y	MSTRG.6482	255	272	-14.29	gAGAGACAggagttagaa	x|||||||xxxxxxxxxx	aTCTCTGTggaacctcca	--	Collagen alpha-1(XXI) chain [Varanus komodoensis]	-	-	-	-	GO:0016020//membrane	-	-	--
miR-9995-y	MSTRG.6690	1212	1229	-12.33	gAGAGACATgagtcgtgt	x|||||||:xxxxxxxxx	aTCTCTGTGgaacctcca	--	uncharacterized protein LOC113906999 [Bos indicus x Bos taurus]	-	-	-	-	-	-	-	--
miR-9995-y	MSTRG.6869	1781	1799	-16.5	cAGAGACAGGTTGTGAGtt	x|||||||xx|||x|||xx	aTCTCTGTGGAAC-CTCca	ABCC4	multidrug resistance-associated protein 4-like isoform X1 [Bos indicus x Bos taurus]	Environmental Information Processing;Organismal Systems;Environmental Information Processing;Human Diseases	Signal transduction;Digestive system;Membrane transport;Drug resistance: antineoplastic	ko04024//cAMP signaling pathway;ko04976//Bile secretion;ko02010//ABC transporters;ko01523//Antifolate resistance	K05673;K05673;K05673;K05673	GO:0030667//secretory granule membrane;GO:0031224//intrinsic component of membrane	GO:0015405//P-P-bond-hydrolysis-driven transmembrane transporter activity;GO:0016616//oxidoreductase activity, acting on the CH-OH group of donors, NAD or NADP as acceptor;GO:0016887//ATPase activity;GO:0032550//purine ribonucleoside binding	GO:0001775//cell activation;GO:0006811//ion transport;GO:0007599//hemostasis;GO:0008284//positive regulation of cell proliferation;GO:0009719//response to endogenous stimulus;GO:0010033//response to organic substance;GO:0015893//drug transport;GO:0044710//single-organism metabolic process	--
miR-4451-z	MSTRG.29222	4956	4978	-20.58	tCCATCTCTATGGGTCTCCcagt	x|||||||xxxxx||||||xxxx	tGGTAGAG-----CAGAGGactg	--	serine/arginine repetitive matrix protein 1-like [Zalophus californianus]	-	-	-	-	GO:0042579//microbody	GO:0005515//protein binding;GO:0016647//oxidoreductase activity, acting on the CH-NH group of donors, oxygen as acceptor	GO:0006596//polyamine biosynthetic process;GO:0006598//polyamine catabolic process;GO:0031328//positive regulation of cellular biosynthetic process;GO:0044710//single-organism metabolic process;GO:0051234//establishment of localization	--
miR-4451-z	MSTRG.31466	133	149	-23.59	gCCATCTCGAG-CCTGcg	x||||||||xxx||||xx	tGGTAGAGCAGAGGACtg	LONRF2	LOW QUALITY PROTEIN: LON peptidase N-terminal domain and RING finger protein 2 [Bos taurus]	-	-	-	-	-	GO:0046914//transition metal ion binding	GO:0019538//protein metabolic process	--
miR-4451-z	MSTRG.33557	335	354	-18.49	gCCATCTCCCGTCaagggcc	x|||||||xx|||xxxxxxx	tGGTAGAG--CAGaggactg	ARHGAP6	rho GTPase-activating protein 6 isoform X2 [Bos indicus x Bos taurus]	-	-	-	-	GO:0015629//actin cytoskeleton;GO:0044444//cytoplasmic part	GO:0019899//enzyme binding;GO:0019904//protein domain specific binding;GO:0030674//protein binding, bridging;GO:0060229//lipase activator activity	GO:0001953//negative regulation of cell-matrix adhesion;GO:0007045//cell-substrate adherens junction assembly;GO:0008154//actin polymerization or depolymerization;GO:0010863//positive regulation of phospholipase C activity;GO:0032232//negative regulation of actin filament bundle assembly;GO:0043087//regulation of GTPase activity	--
miR-2308-z	MSTRG.20070	465	484	-15.03	aACCCGAAGATCagaaagtt	x|||||||xx||xxxxxxxx	tTGGGCTTGCAGcagagagt	CCNG1	TPA: cyclin-G1-like [Bos taurus]	Human Diseases;Cellular Processes	Cancer: overview;Cell growth and death	ko05206//MicroRNAs in cancer;ko04115//p53 signaling pathway	K10145;K10145	GO:0043005//neuron projection;GO:0043231//intracellular membrane-bounded organelle;GO:0044297//cell body;GO:0044444//cytoplasmic part	GO:0005515//protein binding	GO:0000280//nuclear division;GO:0007417//central nervous system development;GO:0009719//response to endogenous stimulus;GO:0031572//G2 DNA damage checkpoint;GO:0040007//growth;GO:0042981//regulation of apoptotic process;GO:0048646//anatomical structure formation involved in morphogenesis;GO:0051726//regulation of cell cycle	--
miR-2308-z	MSTRG.31464	547	568	-18.89	gACCCGAAACGACCTCATCTgc	x|||||||x||x|x||x|||xx	tTGGGCTT-GCAGCAG-AGAgt	--	protein N-lysine methyltransferase METTL21A isoform X3 [Ovis aries]	Organismal Systems	Sensory system	ko04742//Taste transduction	K08474	GO:0005576//extracellular region;GO:0031224//intrinsic component of membrane;GO:0044424//intracellular part	GO:0005488//binding;GO:0060089//molecular transducer activity	GO:0001525//angiogenesis;GO:0007166//cell surface receptor signaling pathway;GO:0007606//sensory perception of chemical stimulus;GO:0040013//negative regulation of locomotion;GO:0048523//negative regulation of cellular process;GO:0051241//negative regulation of multicellular organismal process	--
miR-2308-z	MSTRG.31466	853	872	-13.13	gACCCGAAgaaagaagtgac	x|||||||xxxxxxxxxxxx	tTGGGCTTgcagcagagagt	LONRF2	LOW QUALITY PROTEIN: LON peptidase N-terminal domain and RING finger protein 2 [Bos taurus]	-	-	-	-	-	GO:0046914//transition metal ion binding	GO:0019538//protein metabolic process	--
miR-2308-z	MSTRG.4090	8461	8481	-20.8	tACCCGAATGTAAATTTCgac	x|||||||:||xxx|:||xxx	tTGGGCTTGCAGC-AGAGagt	--	PREDICTED: basic salivary proline-rich protein 1-like isoform X2 [Bos indicus]	-	-	-	-	GO:0031224//intrinsic component of membrane;GO:0044421//extracellular region part	GO:0043169//cation binding;GO:0060089//molecular transducer activity	GO:0007162//negative regulation of cell adhesion;GO:0007169//transmembrane receptor protein tyrosine kinase signaling pathway;GO:0007606//sensory perception of chemical stimulus;GO:0010596//negative regulation of endothelial cell migration;GO:0045765//regulation of angiogenesis;GO:0048869//cellular developmental process;GO:0050922//negative regulation of chemotaxis	--
miR-2308-z	MSTRG.4101	852	871	-12.3	tACCCGAAatgcacctggta	x|||||||xxxxxxxxxxxx	tTGGGCTTgcagcagagagt	--	-	-	-	-	-	-	-	-	--
miR-2308-z	MSTRG.6530	324	343	-15.38	aACCCGAAaaatacgaggtc	x|||||||xxxxxxxxxxxx	tTGGGCTTgcagcagagagt	--	-	-	-	-	-	-	-	-	--
miR-32-y	MSTRG.1430	3312	3333	-10.2	tTTAAATCGATCAACATTAgaa	x|||||||x||xx|||:||xxx	cAATTTAG-TATGTGTGATatt	FBXO30	PREDICTED: F-box only protein 30 [Bison bison bison]	-	-	-	-	-	GO:0004721//phosphoprotein phosphatase activity;GO:0019787//ubiquitin-like protein transferase activity;GO:0030247//polysaccharide binding;GO:0046914//transition metal ion binding	GO:0006470//protein dephosphorylation;GO:0032446//protein modification by small protein conjugation	--
miR-998-y	MSTRG.21179	818	838	-16.27	aTCGTGGTAGAACA-GTAGAac	x||||||||xxxx|x||x||xx	tAGCACCATGGGATTCAGCTca	--	LOW QUALITY PROTEIN: collagen alpha-1(IV) chain-like [Phocoena sinus]	-	-	-	-	-	-	-	--
miR-998-y	MSTRG.22496	416	437	-19.94	gTCGTGGTATTTTAccggcttc	x||||||||:::||xxxxxxxx	tAGCACCATGGGATtcagctca	--	endonuclease-reverse transcriptase [Babesia ovata]	-	-	-	-	GO:0031252//cell leading edge;GO:0070161//anchoring junction	GO:0003779//actin binding;GO:0050839//cell adhesion molecule binding	GO:0010468//regulation of gene expression;GO:0098602//single organism cell adhesion	--
miR-998-y	MSTRG.29222	4451	4470	-22.32	gTCGTGGT--CCTGAGggatgt	x|||||||xx|||:||xxxxxx	tAGCACCATGGGATTCagctca	--	serine/arginine repetitive matrix protein 1-like [Zalophus californianus]	-	-	-	-	GO:0042579//microbody	GO:0005515//protein binding;GO:0016647//oxidoreductase activity, acting on the CH-NH group of donors, oxygen as acceptor	GO:0006596//polyamine biosynthetic process;GO:0006598//polyamine catabolic process;GO:0031328//positive regulation of cellular biosynthetic process;GO:0044710//single-organism metabolic process;GO:0051234//establishment of localization	--
miR-998-y	MSTRG.29423	1275	1296	-21.46	gTCGTGGTCCCTTccccgcccg	x|||||||x||:|xxxxxxxxx	tAGCACCATGGGAttcagctca	FBN3	fibrillin-3 [Bos taurus]	-	-	-	-	-	-	GO:0007507//heart development;GO:0009887//organ morphogenesis;GO:0009987//cellular process	--
miR-998-y	MSTRG.4090	3614	3639	-23.73	gTCGTGGTCCACCCACTAGGgggttc	x|||||||xx||||xx||:|xxxxxx	tAGCACCA--TGGG--ATTCagctca	--	PREDICTED: basic salivary proline-rich protein 1-like isoform X2 [Bos indicus]	-	-	-	-	GO:0031224//intrinsic component of membrane;GO:0044421//extracellular region part	GO:0043169//cation binding;GO:0060089//molecular transducer activity	GO:0007162//negative regulation of cell adhesion;GO:0007169//transmembrane receptor protein tyrosine kinase signaling pathway;GO:0007606//sensory perception of chemical stimulus;GO:0010596//negative regulation of endothelial cell migration;GO:0045765//regulation of angiogenesis;GO:0048869//cellular developmental process;GO:0050922//negative regulation of chemotaxis	--
miR-998-y	MSTRG.6869	366	389	-13.32	cTCGTGGTCGACACTtcattaaga	x|||||||xx||x||xxxxxxxxx	tAGCACCA--TGGGAttcagctca	ABCC4	multidrug resistance-associated protein 4-like isoform X1 [Bos indicus x Bos taurus]	Environmental Information Processing;Organismal Systems;Environmental Information Processing;Human Diseases	Signal transduction;Digestive system;Membrane transport;Drug resistance: antineoplastic	ko04024//cAMP signaling pathway;ko04976//Bile secretion;ko02010//ABC transporters;ko01523//Antifolate resistance	K05673;K05673;K05673;K05673	GO:0030667//secretory granule membrane;GO:0031224//intrinsic component of membrane	GO:0015405//P-P-bond-hydrolysis-driven transmembrane transporter activity;GO:0016616//oxidoreductase activity, acting on the CH-OH group of donors, NAD or NADP as acceptor;GO:0016887//ATPase activity;GO:0032550//purine ribonucleoside binding	GO:0001775//cell activation;GO:0006811//ion transport;GO:0007599//hemostasis;GO:0008284//positive regulation of cell proliferation;GO:0009719//response to endogenous stimulus;GO:0010033//response to organic substance;GO:0015893//drug transport;GO:0044710//single-organism metabolic process	--
miR-306-x	MSTRG.1906	329	349	-18.06	aGTCCATGGGTCGaaagtcga	x|||||||:x:|:xxxxxxxx	tCAGGTACTAGGTgactctga	UQCRC2	cytochrome b-c1 complex subunit 2, mitochondrial [Bos taurus]	Metabolism;Human Diseases;Human Diseases;Organismal Systems;Human Diseases;Metabolism;Human Diseases;Organismal Systems	Global and overview maps;Neurodegenerative disease;Neurodegenerative disease;Environmental adaptation;Endocrine and metabolic disease;Energy metabolism;Neurodegenerative disease;Circulatory system	ko01100//Metabolic pathways;ko05010//Alzheimer disease;ko05016//Huntington disease;ko04714//Thermogenesis;ko04932//Non-alcoholic fatty liver disease;ko00190//Oxidative phosphorylation;ko05012//Parkinson disease;ko04260//Cardiac muscle contraction	K00415;K00415;K00415;K00415;K00415;K00415;K00415;K00415	GO:0019866//organelle inner membrane;GO:0031988//membrane-bounded vesicle;GO:0044455//mitochondrial membrane part	GO:0004175//endopeptidase activity;GO:0005515//protein binding;GO:0043169//cation binding	GO:0019538//protein metabolic process;GO:0022900//electron transport chain;GO:0045333//cellular respiration;GO:0051234//establishment of localization	--
miR-874-z	MSTRG.15669	82	109	-33.37	gACGGGACGGGCAGGGCACGGGCgcgca	x|||||||x||xx|xx|x|x|||xxxxx	cTGCCCTGGCC--CGAGGGACCGacttt	--	-	-	-	-	-	-	-	-	--
miR-874-z	MSTRG.18801	1442	1467	-27.76	gACGGGACCtcggaagtgaaaccaga	x||||||||xxxxxxxxxxxxxxxxx	cTGCCCTGGcccgagggaccgacttt	MKI67	PREDICTED: antigen KI-67 [Bos mutus]	-	-	-	-	GO:0005694//chromosome;GO:0043231//intracellular membrane-bounded organelle	GO:0003723//RNA binding;GO:0005515//protein binding;GO:0036094//small molecule binding	GO:0000280//nuclear division;GO:0009408//response to heat;GO:0010033//response to organic substance;GO:0031099//regeneration;GO:0044260//cellular macromolecule metabolic process;GO:0044763//single-organism cellular process;GO:1903510//mucopolysaccharide metabolic process	--
miR-874-z	MSTRG.21179	440	465	-31.29	gACGGGACCGGagggaaggggtctca	x||||||||||xxxxxxxxxxxxxxx	cTGCCCTGGCCcgagggaccgacttt	--	LOW QUALITY PROTEIN: collagen alpha-1(IV) chain-like [Phocoena sinus]	-	-	-	-	-	-	-	--
miR-874-z	MSTRG.29222	8282	8307	-31.24	cACGGGACCGAGGTCTGTGAGTGAta	x|||||||||x|x||:x||xx|||xx	cTGCCCTGGCCCGAGGGACCGACTtt	--	serine/arginine repetitive matrix protein 1-like [Zalophus californianus]	-	-	-	-	GO:0042579//microbody	GO:0005515//protein binding;GO:0016647//oxidoreductase activity, acting on the CH-NH group of donors, oxygen as acceptor	GO:0006596//polyamine biosynthetic process;GO:0006598//polyamine catabolic process;GO:0031328//positive regulation of cellular biosynthetic process;GO:0044710//single-organism metabolic process;GO:0051234//establishment of localization	--
miR-874-z	MSTRG.4090	18203	18230	-25.9	aACGGGACTGGAACACAACTGGgaccta	x|||||||:||xx|x|xx||||xxxxxx	cTGCCCTGGCCC-GAGG-GACCgacttt	--	PREDICTED: basic salivary proline-rich protein 1-like isoform X2 [Bos indicus]	-	-	-	-	GO:0031224//intrinsic component of membrane;GO:0044421//extracellular region part	GO:0043169//cation binding;GO:0060089//molecular transducer activity	GO:0007162//negative regulation of cell adhesion;GO:0007169//transmembrane receptor protein tyrosine kinase signaling pathway;GO:0007606//sensory perception of chemical stimulus;GO:0010596//negative regulation of endothelial cell migration;GO:0045765//regulation of angiogenesis;GO:0048869//cellular developmental process;GO:0050922//negative regulation of chemotaxis	--
miR-874-z	MSTRG.4101	800	825	-21.75	cACGGGACCtcaccggacctctactc	x||||||||xxxxxxxxxxxxxxxxx	cTGCCCTGGcccgagggaccgacttt	--	-	-	-	-	-	-	-	-	--
miR-874-z	MSTRG.6690	271	296	-36.43	gACGGGACCGGCCGGCCgcagggcct	x||||||||||x|xx||xxxxxxxxx	cTGCCCTGGCCCGAGGGaccgacttt	--	uncharacterized protein LOC113906999 [Bos indicus x Bos taurus]	-	-	-	-	-	-	-	--
miR-205-z	MSTRG.18801	1169	1192	-14.86	cGGAAGTAcacccccgaaaccggg	x|||||||xxxxxxxxxxxxxxxx	tCCTTCATtccaccggagtctgtt	MKI67	PREDICTED: antigen KI-67 [Bos mutus]	-	-	-	-	GO:0005694//chromosome;GO:0043231//intracellular membrane-bounded organelle	GO:0003723//RNA binding;GO:0005515//protein binding;GO:0036094//small molecule binding	GO:0000280//nuclear division;GO:0009408//response to heat;GO:0010033//response to organic substance;GO:0031099//regeneration;GO:0044260//cellular macromolecule metabolic process;GO:0044763//single-organism cellular process;GO:1903510//mucopolysaccharide metabolic process	--
miR-205-z	MSTRG.4090	10186	10209	-17.85	aGGAAGTAActctcaccggtcttc	x||||||||xxxxxxxxxxxxxxx	tCCTTCATTccaccggagtctgtt	--	PREDICTED: basic salivary proline-rich protein 1-like isoform X2 [Bos indicus]	-	-	-	-	GO:0031224//intrinsic component of membrane;GO:0044421//extracellular region part	GO:0043169//cation binding;GO:0060089//molecular transducer activity	GO:0007162//negative regulation of cell adhesion;GO:0007169//transmembrane receptor protein tyrosine kinase signaling pathway;GO:0007606//sensory perception of chemical stimulus;GO:0010596//negative regulation of endothelial cell migration;GO:0045765//regulation of angiogenesis;GO:0048869//cellular developmental process;GO:0050922//negative regulation of chemotaxis	--
miR-205-z	MSTRG.6530	54	74	-26.17	aGGAAGTAAGG--GTC-CAGGTca	x||||||||||xx|:|x|||::xx	tCCTTCATTCCACCGGAGTCTGtt	--	-	-	-	-	-	-	-	-	--
miR-1559-x	MSTRG.3691	498	520	-18.25	tAGCTACGGTCTAAAGGAGGttt	x|||||||:x|x|x|x||x|xxx	tTCGATGCTTG-TATGCTACtcc	MRC1	PREDICTED: macrophage mannose receptor 1 [Bos mutus]	Human Diseases;Cellular Processes	Infectious disease: bacterial;Transport and catabolism	ko05152//Tuberculosis;ko04145//Phagosome	K06560;K06560	GO:0016021//integral component of membrane;GO:0031090//organelle membrane;GO:0044464//cell part	GO:0038023//signaling receptor activity;GO:0048029//monosaccharide binding	GO:0006897//endocytosis;GO:0032496//response to lipopolysaccharide;GO:0034341//response to interferon-gamma;GO:0050794//regulation of cellular process;GO:0070670//response to interleukin-4	--
miR-514-y	MSTRG.29423	33	53	-13.86	cAACTGTGTCGACGgggggac	x|||||||xx|||:xxxxxxx	aTTGACACTTCTGTgagtaga	FBN3	fibrillin-3 [Bos taurus]	-	-	-	-	-	-	GO:0007507//heart development;GO:0009887//organ morphogenesis;GO:0009987//cellular process	--
miR-514-y	MSTRG.4090	18233	18253	-16.04	tAACTGTGGGTGTAaggtctg	x|||||||::x::|xxxxxxx	aTTGACACTTCTGTgagtaga	--	PREDICTED: basic salivary proline-rich protein 1-like isoform X2 [Bos indicus]	-	-	-	-	GO:0031224//intrinsic component of membrane;GO:0044421//extracellular region part	GO:0043169//cation binding;GO:0060089//molecular transducer activity	GO:0007162//negative regulation of cell adhesion;GO:0007169//transmembrane receptor protein tyrosine kinase signaling pathway;GO:0007606//sensory perception of chemical stimulus;GO:0010596//negative regulation of endothelial cell migration;GO:0045765//regulation of angiogenesis;GO:0048869//cellular developmental process;GO:0050922//negative regulation of chemotaxis	--
miR-514-y	MSTRG.6482	589	609	-13.51	gAACTGTGTAGAaggaaactg	x|||||||x|||xxxxxxxxx	aTTGACACTTCTgtgagtaga	--	Collagen alpha-1(XXI) chain [Varanus komodoensis]	-	-	-	-	GO:0016020//membrane	-	-	--
miR-514-y	MSTRG.9421	750	770	-13.9	aAACTGTGACTTCTCTCcaac	x||||||||xxx|x|||xxxx	aTTGACACTTCTGTGAGtaga	--	thymocyte nuclear protein 1 isoform X2 [Odocoileus virginianus texanus]	-	-	-	-	-	-	-	--
miR-6775-z	MSTRG.14602	21	45	-35.32	gTGCCAGGGCCTCGACGCGAGGTca	x||||||||x|xx||x:||x|||xx	cACGGTCCCTGTTCTCTGCCCCAgt	ZNF671	zinc finger protein 28 homolog [Zalophus californianus]	Human Diseases	Infectious disease: viral	ko05168//Herpes simplex virus 1 infection	K09228	-	-	-	--
miR-6775-z	MSTRG.21179	685	712	-30.93	cTGCCAGGGCGGACGAGAGAGGTAGTgt	x||||||||xxx||:|||||x|xx||xx	cACGGTCCC---TGTTCTCTGCCCCAgt	--	LOW QUALITY PROTEIN: collagen alpha-1(IV) chain-like [Phocoena sinus]	-	-	-	-	-	-	-	--
miR-6775-z	MSTRG.29222	2511	2535	-31.72	gTGCCAGG-ACCTGTGACTGTGGTct	x|||||||x||xx|x|||x|x|||xx	cACGGTCCCTGTTCTCTGCC-CCAgt	--	serine/arginine repetitive matrix protein 1-like [Zalophus californianus]	-	-	-	-	GO:0042579//microbody	GO:0005515//protein binding;GO:0016647//oxidoreductase activity, acting on the CH-NH group of donors, oxygen as acceptor	GO:0006596//polyamine biosynthetic process;GO:0006598//polyamine catabolic process;GO:0031328//positive regulation of cellular biosynthetic process;GO:0044710//single-organism metabolic process;GO:0051234//establishment of localization	--
miR-6775-z	MSTRG.33557	12	36	-20.4	cTGCCAGGGctcccgactcctcctc	x||||||||xxxxxxxxxxxxxxxx	cACGGTCCCtgttctctgccccagt	ARHGAP6	rho GTPase-activating protein 6 isoform X2 [Bos indicus x Bos taurus]	-	-	-	-	GO:0015629//actin cytoskeleton;GO:0044444//cytoplasmic part	GO:0019899//enzyme binding;GO:0019904//protein domain specific binding;GO:0030674//protein binding, bridging;GO:0060229//lipase activator activity	GO:0001953//negative regulation of cell-matrix adhesion;GO:0007045//cell-substrate adherens junction assembly;GO:0008154//actin polymerization or depolymerization;GO:0010863//positive regulation of phospholipase C activity;GO:0032232//negative regulation of actin filament bundle assembly;GO:0043087//regulation of GTPase activity	--
miR-2011-y	MSTRG.15958	1673	1694	-15.54	aGTTCCACACctcttccgtctc	x|||||||||xxxxxxxxxxxx	cCAAGGTGTGctagtgacgact	--	-	-	-	-	-	-	-	-	--
miR-2011-y	MSTRG.18722	937	962	-20.65	gGTTCCACTACCCTGGTCTCGGTctc	x|||||||x||xxx|:||x|x|:xxx	cCAAGGTG-TG---CTAGTGACGact	DMBT1	PREDICTED: deleted in malignant brain tumors 1 protein isoform X6 [Bison bison bison]	Organismal Systems	Digestive system	ko04970//Salivary secretion	K13912	GO:0030666//endocytic vesicle membrane;GO:0030667//secretory granule membrane;GO:0031012//extracellular matrix;GO:0044421//extracellular region part;GO:0044425//membrane part	GO:0019899//enzyme binding;GO:0038023//signaling receptor activity;GO:0038024//cargo receptor activity	GO:0001701//in utero embryonic development;GO:0002758//innate immune response-activating signal transduction;GO:0006897//endocytosis;GO:0008283//cell proliferation;GO:0019731//antibacterial humoral response;GO:0030856//regulation of epithelial cell differentiation	--
miR-2011-y	MSTRG.22162	1310	1334	-16.91	gGTTCCACCCCCCGTTCCCTTCccc	x|||||||x|xxx|x||x||x|xxx	cCAAGGTGTG---CTAGTGACGact	--	translation initiation factor IF-2-like [Cervus canadensis]	-	-	-	-	-	-	-	--
miR-202-x	MSTRG.3691	480	498	-15.94	tAGGATACGT-TA-GAAAAgc	x|||||||||x||x|||x|xx	tTCCTATGCATATACTTCTtt	MRC1	PREDICTED: macrophage mannose receptor 1 [Bos mutus]	Human Diseases;Cellular Processes	Infectious disease: bacterial;Transport and catabolism	ko05152//Tuberculosis;ko04145//Phagosome	K06560;K06560	GO:0016021//integral component of membrane;GO:0031090//organelle membrane;GO:0044464//cell part	GO:0038023//signaling receptor activity;GO:0048029//monosaccharide binding	GO:0006897//endocytosis;GO:0032496//response to lipopolysaccharide;GO:0034341//response to interferon-gamma;GO:0050794//regulation of cellular process;GO:0070670//response to interleukin-4	--
miR-204-y	MSTRG.14602	1022	1042	-20.29	cGACCCTTCaagagcggtggg	x||||||||xxxxxxxxxxxx	gCTGGGAAGgcaaagggacgt	ZNF671	zinc finger protein 28 homolog [Zalophus californianus]	Human Diseases	Infectious disease: viral	ko05168//Herpes simplex virus 1 infection	K09228	-	-	-	--
miR-204-y	MSTRG.21179	17	37	-15.8	cGACCCTTggggagacaggac	x|||||||xxxxxxxxxxxxx	gCTGGGAAggcaaagggacgt	--	LOW QUALITY PROTEIN: collagen alpha-1(IV) chain-like [Phocoena sinus]	-	-	-	-	-	-	-	--
miR-204-y	MSTRG.22496	100	120	-18.92	gGACCCTTTTGGTggaagcac	x|||||||::|x|xxxxxxxx	gCTGGGAAGGCAAagggacgt	--	endonuclease-reverse transcriptase [Babesia ovata]	-	-	-	-	GO:0031252//cell leading edge;GO:0070161//anchoring junction	GO:0003779//actin binding;GO:0050839//cell adhesion molecule binding	GO:0010468//regulation of gene expression;GO:0098602//single organism cell adhesion	--
miR-204-y	MSTRG.29222	6279	6299	-25	cGACCCTTCTACGTCCggtcg	x||||||||:xxx|||xxxxx	gCTGGGAAGGCAAAGGgacgt	--	serine/arginine repetitive matrix protein 1-like [Zalophus californianus]	-	-	-	-	GO:0042579//microbody	GO:0005515//protein binding;GO:0016647//oxidoreductase activity, acting on the CH-NH group of donors, oxygen as acceptor	GO:0006596//polyamine biosynthetic process;GO:0006598//polyamine catabolic process;GO:0031328//positive regulation of cellular biosynthetic process;GO:0044710//single-organism metabolic process;GO:0051234//establishment of localization	--
miR-204-y	MSTRG.29423	543	563	-21.5	cGACCCTTGGGCTGCTggtga	x|||||||xx|x|x|:xxxxx	gCTGGGAAGGCAAAGGgacgt	FBN3	fibrillin-3 [Bos taurus]	-	-	-	-	-	-	GO:0007507//heart development;GO:0009887//organ morphogenesis;GO:0009987//cellular process	--
miR-204-y	MSTRG.4090	11805	11825	-19.71	tGACCCTTGGGTCTCCGTcct	x|||||||xx||x|||x|xxx	gCTGGGAAGGCAAAGGGAcgt	--	PREDICTED: basic salivary proline-rich protein 1-like isoform X2 [Bos indicus]	-	-	-	-	GO:0031224//intrinsic component of membrane;GO:0044421//extracellular region part	GO:0043169//cation binding;GO:0060089//molecular transducer activity	GO:0007162//negative regulation of cell adhesion;GO:0007169//transmembrane receptor protein tyrosine kinase signaling pathway;GO:0007606//sensory perception of chemical stimulus;GO:0010596//negative regulation of endothelial cell migration;GO:0045765//regulation of angiogenesis;GO:0048869//cellular developmental process;GO:0050922//negative regulation of chemotaxis	--
miR-204-y	MSTRG.4101	518	537	-24.94	gGACCCTTCACGGA--CCTGag	x||||||||x||xxxx||||xx	gCTGGGAAG-GCAAAGGGACgt	--	-	-	-	-	-	-	-	-	--
miR-204-y	MSTRG.4578	569	589	-18.36	gGACCCTTCGGggaaatgttc	x||||||||x|xxxxxxxxxx	gCTGGGAAGGCaaagggacgt	--	reverse transcriptase-like [Bos taurus]	-	-	-	-	GO:0043231//intracellular membrane-bounded organelle	GO:0003723//RNA binding	GO:0006464//cellular protein modification process;GO:0015980//energy derivation by oxidation of organic compounds	--
miR-322-y	MSTRG.1430	1340	1359	-10.26	gTTGTACTTaagctttcttt	x||||||||xxxxxxxxxxx	aAACATGAAgcgctgcaaca	FBXO30	PREDICTED: F-box only protein 30 [Bison bison bison]	-	-	-	-	-	GO:0004721//phosphoprotein phosphatase activity;GO:0019787//ubiquitin-like protein transferase activity;GO:0030247//polysaccharide binding;GO:0046914//transition metal ion binding	GO:0006470//protein dephosphorylation;GO:0032446//protein modification by small protein conjugation	--
miR-322-y	MSTRG.21507	1349	1368	-17.38	gTTGTACTTCTCGCCGTgct	x|||||||||x||x|||xxx	aAACATGAAGCGCTGCAaca	Slc29a2	equilibrative nucleoside transporter 2 isoform X2 [Bos taurus]	Human Diseases	Substance dependence	ko05034//Alcoholism	K15014	GO:0016021//integral component of membrane;GO:0031090//organelle membrane;GO:0043231//intracellular membrane-bounded organelle;GO:0043232//intracellular non-membrane-bounded organelle	GO:0015932//nucleobase-containing compound transmembrane transporter activity	GO:0006725//cellular aromatic compound metabolic process;GO:0006863//purine nucleobase transport;GO:0007589//body fluid secretion;GO:0015855//pyrimidine nucleobase transport;GO:0015864//pyrimidine nucleoside transport;GO:0032868//response to insulin;GO:0044763//single-organism cellular process	--
miR-7550-x	MSTRG.21179	103	118	-26.26	gAGGCCGAG--TCCGGac	x||||||||xx|||x|xx	cTCCGGCTCGAAGGACca	--	LOW QUALITY PROTEIN: collagen alpha-1(IV) chain-like [Phocoena sinus]	-	-	-	-	-	-	-	--
miR-7550-x	MSTRG.29222	1215	1232	-25.64	gAGGCCGAGCccgaccgt	x|||||||||xxxxxxxx	cTCCGGCTCGaaggacca	--	serine/arginine repetitive matrix protein 1-like [Zalophus californianus]	-	-	-	-	GO:0042579//microbody	GO:0005515//protein binding;GO:0016647//oxidoreductase activity, acting on the CH-NH group of donors, oxygen as acceptor	GO:0006596//polyamine biosynthetic process;GO:0006598//polyamine catabolic process;GO:0031328//positive regulation of cellular biosynthetic process;GO:0044710//single-organism metabolic process;GO:0051234//establishment of localization	--
miR-7550-x	MSTRG.4090	15186	15202	-15.11	cAGGCCGA-CTagacccg	x|||||||x||xxxxxxx	cTCCGGCTCGAaggacca	--	PREDICTED: basic salivary proline-rich protein 1-like isoform X2 [Bos indicus]	-	-	-	-	GO:0031224//intrinsic component of membrane;GO:0044421//extracellular region part	GO:0043169//cation binding;GO:0060089//molecular transducer activity	GO:0007162//negative regulation of cell adhesion;GO:0007169//transmembrane receptor protein tyrosine kinase signaling pathway;GO:0007606//sensory perception of chemical stimulus;GO:0010596//negative regulation of endothelial cell migration;GO:0045765//regulation of angiogenesis;GO:0048869//cellular developmental process;GO:0050922//negative regulation of chemotaxis	--
miR-12031-z	MSTRG.22496	1173	1194	-18.08	aAACCTCGGGGGGTTTTATTtc	x||||||||xx:|x:x|x||xx	aTTGGAGCCAGTCTGCAGAAgc	--	endonuclease-reverse transcriptase [Babesia ovata]	-	-	-	-	GO:0031252//cell leading edge;GO:0070161//anchoring junction	GO:0003779//actin binding;GO:0050839//cell adhesion molecule binding	GO:0010468//regulation of gene expression;GO:0098602//single organism cell adhesion	--
miR-12031-z	MSTRG.29222	1632	1655	-15.64	gAACCTCGTAGGCAGGgacaacaa	x|||||||xx|x|||:xxxxxxxx	aTTGGAGC--CAGTCTgcagaagc	--	serine/arginine repetitive matrix protein 1-like [Zalophus californianus]	-	-	-	-	GO:0042579//microbody	GO:0005515//protein binding;GO:0016647//oxidoreductase activity, acting on the CH-NH group of donors, oxygen as acceptor	GO:0006596//polyamine biosynthetic process;GO:0006598//polyamine catabolic process;GO:0031328//positive regulation of cellular biosynthetic process;GO:0044710//single-organism metabolic process;GO:0051234//establishment of localization	--
miR-12031-z	MSTRG.31466	2023	2043	-17.65	tAACCTCG-TCGctctccggtt	x|||||||x||:xxxxxxxxxx	aTTGGAGCCAGTctgcagaagc	LONRF2	LOW QUALITY PROTEIN: LON peptidase N-terminal domain and RING finger protein 2 [Bos taurus]	-	-	-	-	-	GO:0046914//transition metal ion binding	GO:0019538//protein metabolic process	--
miR-12031-z	MSTRG.3720	287	308	-11.95	aAACCTCGCTACCAAGATTTaa	x|||||||x|xxx|x|x:||xx	aTTGGAGCCAGTCTGCAGAAgc	--	zinc finger protein 438 isoform X1 [Odocoileus virginianus texanus]	-	-	-	-	GO:0043231//intracellular membrane-bounded organelle	GO:0001071//nucleic acid binding transcription factor activity;GO:0043169//cation binding	GO:0006355//regulation of transcription, DNA-templated	--
miR-12031-z	MSTRG.4090	17956	17977	-21.48	gAACCTCG-TCGGAACGggcgga	x|||||||x||:||x||xxxxxx	aTTGGAGCCAGTCT-GCagaagc	--	PREDICTED: basic salivary proline-rich protein 1-like isoform X2 [Bos indicus]	-	-	-	-	GO:0031224//intrinsic component of membrane;GO:0044421//extracellular region part	GO:0043169//cation binding;GO:0060089//molecular transducer activity	GO:0007162//negative regulation of cell adhesion;GO:0007169//transmembrane receptor protein tyrosine kinase signaling pathway;GO:0007606//sensory perception of chemical stimulus;GO:0010596//negative regulation of endothelial cell migration;GO:0045765//regulation of angiogenesis;GO:0048869//cellular developmental process;GO:0050922//negative regulation of chemotaxis	--
miR-12031-z	MSTRG.4578	1697	1719	-20.27	tAACCTCGAAGTC-GAAGTCGTag	x|||||||xx|||x||x|||x|xx	aTTGGAGC--CAGTCTGCAGAAgc	--	reverse transcriptase-like [Bos taurus]	-	-	-	-	GO:0043231//intracellular membrane-bounded organelle	GO:0003723//RNA binding	GO:0006464//cellular protein modification process;GO:0015980//energy derivation by oxidation of organic compounds	--
miR-12031-z	MSTRG.6482	179	198	-21.16	tAACCTCGA--AGACGaaatcg	x|||||||xxx|||||xxxxxx	aTTGGAGCCAGTCTGCagaagc	--	Collagen alpha-1(XXI) chain [Varanus komodoensis]	-	-	-	-	GO:0016020//membrane	-	-	--
miR-2388-x	MSTRG.9567	767	787	-23.7	gCGAGGGC-GACCCGA-GCGGca	x|||||||x||xxx||x:||:xx	aGCTCCCGTCTCCTCTGTGCTga	AHNAK2	protein AHNAK2 isoform X1 [Bos indicus x Bos taurus]	Human Diseases	Infectious disease: bacterial	ko05132//Salmonella infection	K23934	GO:0012506//vesicle membrane;GO:0031674//I band;GO:0044459//plasma membrane part	-	GO:0007009//plasma membrane organization	--
miR-2388-x	MSTRG.9896	844	868	-29.27	aCGAGGGCAGCAGGCGTATATGGgc	x|||||||||x|||x|x|:|:|:xx	aGCTCCCGTC-TCCTC-TGTGCTga	--	IQ motif and ankyrin repeat domain-containing protein 1 isoform X4 [Cervus canadensis]	-	-	-	-	-	-	-	--
miR-615-x	MSTRG.10777	1834	1855	-28.24	cCCCCAGGTCCCAGGtaacgca	x|||||||xx|||x|xxxxxxx	gGGGGTCCCCGGTGCtcggatc	--	GRAM domain-containing protein 2B isoform X2 [Bos taurus]	Cellular Processes	Transport and catabolism	ko04146//Peroxisome	K00308	GO:0005737//cytoplasm;GO:0043231//intracellular membrane-bounded organelle	GO:0005515//protein binding;GO:0016647//oxidoreductase activity, acting on the CH-NH group of donors, oxygen as acceptor	GO:0006596//polyamine biosynthetic process;GO:0006598//polyamine catabolic process;GO:0009653//anatomical structure morphogenesis;GO:0016043//cellular component organization;GO:0031325//positive regulation of cellular metabolic process;GO:0031326//regulation of cellular biosynthetic process;GO:0044763//single-organism cellular process;GO:0048523//negative regulation of cellular process;GO:0048731…	--
miR-615-x	MSTRG.16811	50	75	-27.53	aCCCCAGGTAGGATCAATGGGCgcgc	x|||||||xx||xx|x|:|:||xxxx	gGGGGTCC--CC--GGTGCTCGgatc	--	TPR and ankyrin repeat-containing protein 1 isoform X3 [Bos taurus]	-	-	-	-	-	GO:0003824//catalytic activity	-	--
miR-615-x	MSTRG.17500	1441	1461	-23.54	cCCCCAGGTCCC-CAACTCaag	x|||||||xx||x|x|x:|xxx	gGGGGTCCCCGGTGCTCGGatc	C4B	complement C4 isoform X1 [Bos taurus]	Human Diseases;Human Diseases;Organismal Systems;Human Diseases	Immune disease;Infectious disease: bacterial;Immune system;Infectious disease: bacterial	ko05322//Systemic lupus erythematosus;ko05150//Staphylococcus aureus infection;ko04610//Complement and coagulation cascades;ko05133//Pertussis	K03989;K03989;K03989;K03989	GO:0016020//membrane;GO:0031988//membrane-bounded vesicle;GO:0044217//other organism part	GO:0001846//opsonin binding;GO:0061135//endopeptidase regulator activity	GO:0002237//response to molecule of bacterial origin;GO:0002673//regulation of acute inflammatory response;GO:0006956//complement activation;GO:0010466//negative regulation of peptidase activity;GO:0019724//B cell mediated immunity;GO:0043277//apoptotic cell clearance	--
miR-615-x	MSTRG.22162	910	929	-25.21	gCCCCAGG--TCGTGGGTCgct	x|||||||xx:|::|:|:|xxx	gGGGGTCCCCGGTGCTCGGatc	--	translation initiation factor IF-2-like [Cervus canadensis]	-	-	-	-	-	-	-	--
miR-615-x	MSTRG.25304	311	332	-20.63	aCCCCAGGAACTCCTACTCcat	x|||||||xx|:x|x|x:|xxx	gGGGGTCCCCGGTGCTCGGatc	EIF3D	eukaryotic translation initiation factor 3 subunit D-like [Pteropus vampyrus]	Genetic Information Processing	Translation	ko03013//Nucleocytoplasmic transport	K03251	GO:0005852//eukaryotic translation initiation factor 3 complex;GO:0070993//translation preinitiation complex	GO:0008135//translation factor activity, RNA binding	GO:0006417//regulation of translation;GO:0022618//ribonucleoprotein complex assembly	--
miR-615-x	MSTRG.3598	578	599	-30.58	aCCCCAGGGGTTACTAcaggag	x|||||||||::||x|xxxxxx	gGGGGTCCCCGGTGCTcggatc	OPTN	PREDICTED: optineurin isoform X2 [Bos mutus]	Cellular Processes	Transport and catabolism	ko04137//Mitophagy - animal	K19946	-	-	-	--
miR-615-x	MSTRG.9563	648	668	-32.95	cCCCCAGGTGTCCCG-GCCgtc	x|||||||x|:|x||x|||xxx	gGGGGTCCCCGGTGCTCGGatc	AHNAK2	PREDICTED: protein AHNAK2 [Bos mutus]	Human Diseases	Infectious disease: bacterial	ko05132//Salmonella infection	K23934	GO:0012506//vesicle membrane;GO:0031674//I band;GO:0044459//plasma membrane part	-	GO:0007009//plasma membrane organization	--
miR-615-x	MSTRG.9896	748	774	-27.87	gCCCCAGGCCGGCTTCCGCGGGACacc	x|||||||xx|||xxx|:||:|x|xxx	gGGGGTCC--CCG---GTGCTCGGatc	--	IQ motif and ankyrin repeat domain-containing protein 1 isoform X4 [Cervus canadensis]	-	-	-	-	-	-	-	--
miR-2461-y	MSTRG.10777	913	932	-23.37	gGTCTGACG-TCGTC-CAaatt	x|||||||xx|||||x||xxxx	tCAGACTGAGAGCAGTGTgcct	--	GRAM domain-containing protein 2B isoform X2 [Bos taurus]	Cellular Processes	Transport and catabolism	ko04146//Peroxisome	K00308	GO:0005737//cytoplasm;GO:0043231//intracellular membrane-bounded organelle	GO:0005515//protein binding;GO:0016647//oxidoreductase activity, acting on the CH-NH group of donors, oxygen as acceptor	GO:0006596//polyamine biosynthetic process;GO:0006598//polyamine catabolic process;GO:0009653//anatomical structure morphogenesis;GO:0016043//cellular component organization;GO:0031325//positive regulation of cellular metabolic process;GO:0031326//regulation of cellular biosynthetic process;GO:0044763//single-organism cellular process;GO:0048523//negative regulation of cellular process;GO:0048731…	--
miR-2461-y	MSTRG.15080	440	462	-14.95	cGTCTGACCTGTATTTATtgtca	x|||||||x|x|xx|:|:xxxxx	tCAGACTG-AGAGCAGTGtgcct	--	PREDICTED: immunoglobulin superfamily member 23 [Bos mutus]	-	-	-	-	-	-	-	--
miR-2461-y	MSTRG.18722	524	545	-16.61	cGTCTGACagcttcgggtccaa	x|||||||xxxxxxxxxxxxxx	tCAGACTGagagcagtgtgcct	DMBT1	PREDICTED: deleted in malignant brain tumors 1 protein isoform X6 [Bison bison bison]	Organismal Systems	Digestive system	ko04970//Salivary secretion	K13912	GO:0030666//endocytic vesicle membrane;GO:0030667//secretory granule membrane;GO:0031012//extracellular matrix;GO:0044421//extracellular region part;GO:0044425//membrane part	GO:0019899//enzyme binding;GO:0038023//signaling receptor activity;GO:0038024//cargo receptor activity	GO:0001701//in utero embryonic development;GO:0002758//innate immune response-activating signal transduction;GO:0006897//endocytosis;GO:0008283//cell proliferation;GO:0019731//antibacterial humoral response;GO:0030856//regulation of epithelial cell differentiation	--
miR-2461-y	MSTRG.21507	951	971	-22.88	aGTCTGAC-CTCTTCGagtcga	x|||||||x|||x||:xxxxxx	tCAGACTGAGAGCAGTgtgcct	Slc29a2	equilibrative nucleoside transporter 2 isoform X2 [Bos taurus]	Human Diseases	Substance dependence	ko05034//Alcoholism	K15014	GO:0016021//integral component of membrane;GO:0031090//organelle membrane;GO:0043231//intracellular membrane-bounded organelle;GO:0043232//intracellular non-membrane-bounded organelle	GO:0015932//nucleobase-containing compound transmembrane transporter activity	GO:0006725//cellular aromatic compound metabolic process;GO:0006863//purine nucleobase transport;GO:0007589//body fluid secretion;GO:0015855//pyrimidine nucleobase transport;GO:0015864//pyrimidine nucleoside transport;GO:0032868//response to insulin;GO:0044763//single-organism cellular process	--
miR-2461-y	MSTRG.3753	780	803	-19.38	aGTCTGACATCGCATTTACCTGat	x|||||||x||x|x|:x||x:|xx	tCAGACTG-AGAGCAG-TGTGCct	WAC	WW domain-containing adapter protein with coiled-coil isoform X2 [Bos taurus]	-	-	-	-	GO:0016604//nuclear body;GO:0030529//intracellular ribonucleoprotein complex	GO:0001099//basal RNA polymerase II transcription machinery binding	GO:0000077//DNA damage checkpoint;GO:0006355//regulation of transcription, DNA-templated;GO:0006513//protein monoubiquitination;GO:0010508//positive regulation of autophagy;GO:0031330//negative regulation of cellular catabolic process;GO:0033523//histone H2B ubiquitination	--
miR-2461-y	MSTRG.5822	795	815	-13.91	cGTCTGAC-CAAGTATTATtga	x|||||||x|xx||xx:|:xxx	tCAGACTGAGAGCAGTGTGcct	--	-	-	-	-	-	-	-	-	--
miR-2461-y	MSTRG.7207	816	837	-18.99	aGTCTGACCGCCGACTGAAGga	x|||||||xxx||x|xx|x|xx	tCAGACTGAGAGCAGTGTGCct	--	endonuclease-reverse transcriptase [Babesia ovata]	-	-	-	-	GO:0031224//intrinsic component of membrane;GO:0044464//cell part	GO:0043168//anion binding	GO:0044237//cellular metabolic process	--
miR-371-x	MSTRG.14602	321	341	-17.12	gGAGTTTGAGGCTTggagcga	x||||||||x:|::xxxxxxx	aCTCAAACTGTGGGggcactt	ZNF671	zinc finger protein 28 homolog [Zalophus californianus]	Human Diseases	Infectious disease: viral	ko05168//Herpes simplex virus 1 infection	K09228	-	-	-	--
miR-371-x	MSTRG.22496	1663	1684	-14.47	tGAGTTTGAGTACaggtagctc	x||||||||x:||xxxxxxxxx	aCTCAAACT-GTGggggcactt	--	endonuclease-reverse transcriptase [Babesia ovata]	-	-	-	-	GO:0031252//cell leading edge;GO:0070161//anchoring junction	GO:0003779//actin binding;GO:0050839//cell adhesion molecule binding	GO:0010468//regulation of gene expression;GO:0098602//single organism cell adhesion	--
miR-371-x	MSTRG.4090	13592	13611	-14.89	cGAGTTTGG-ACCaaagaatc	x|||||||:x|||xxxxxxxx	aCTCAAACTGTGGgggcactt	--	PREDICTED: basic salivary proline-rich protein 1-like isoform X2 [Bos indicus]	-	-	-	-	GO:0031224//intrinsic component of membrane;GO:0044421//extracellular region part	GO:0043169//cation binding;GO:0060089//molecular transducer activity	GO:0007162//negative regulation of cell adhesion;GO:0007169//transmembrane receptor protein tyrosine kinase signaling pathway;GO:0007606//sensory perception of chemical stimulus;GO:0010596//negative regulation of endothelial cell migration;GO:0045765//regulation of angiogenesis;GO:0048869//cellular developmental process;GO:0050922//negative regulation of chemotaxis	--
miR-371-x	MSTRG.6869	2204	2226	-18.62	tGAGTTTGTAACAATTCCGactc	x|||||||xx|||x::|||xxxx	aCTCAAAC--TGTGGGGGCactt	ABCC4	multidrug resistance-associated protein 4-like isoform X1 [Bos indicus x Bos taurus]	Environmental Information Processing;Organismal Systems;Environmental Information Processing;Human Diseases	Signal transduction;Digestive system;Membrane transport;Drug resistance: antineoplastic	ko04024//cAMP signaling pathway;ko04976//Bile secretion;ko02010//ABC transporters;ko01523//Antifolate resistance	K05673;K05673;K05673;K05673	GO:0030667//secretory granule membrane;GO:0031224//intrinsic component of membrane	GO:0015405//P-P-bond-hydrolysis-driven transmembrane transporter activity;GO:0016616//oxidoreductase activity, acting on the CH-OH group of donors, NAD or NADP as acceptor;GO:0016887//ATPase activity;GO:0032550//purine ribonucleoside binding	GO:0001775//cell activation;GO:0006811//ion transport;GO:0007599//hemostasis;GO:0008284//positive regulation of cell proliferation;GO:0009719//response to endogenous stimulus;GO:0010033//response to organic substance;GO:0015893//drug transport;GO:0044710//single-organism metabolic process	--
miR-11990-z	MSTRG.10777	520	543	-19.66	cTCCGTCTCTTACAGggaccacca	x|||||||||x||x|xxxxxxxxx	tAGGCAGAGA-TGACagtcatact	--	GRAM domain-containing protein 2B isoform X2 [Bos taurus]	Cellular Processes	Transport and catabolism	ko04146//Peroxisome	K00308	GO:0005737//cytoplasm;GO:0043231//intracellular membrane-bounded organelle	GO:0005515//protein binding;GO:0016647//oxidoreductase activity, acting on the CH-NH group of donors, oxygen as acceptor	GO:0006596//polyamine biosynthetic process;GO:0006598//polyamine catabolic process;GO:0009653//anatomical structure morphogenesis;GO:0016043//cellular component organization;GO:0031325//positive regulation of cellular metabolic process;GO:0031326//regulation of cellular biosynthetic process;GO:0044763//single-organism cellular process;GO:0048523//negative regulation of cellular process;GO:0048731…	--
miR-11990-z	MSTRG.1213	1224	1245	-15.42	cTCCGTCTCCAATCTCA-TGTtg	x||||||||x|x|x|||x|:|xx	tAGGCAGAGATGACAGTCATAct	--	-	-	-	-	-	-	-	-	--
miR-11990-z	MSTRG.15958	3723	3747	-22.33	aTCCGTCTTGACATTGTCttacgta	x|||||||:x||xx||||xxxxxxx	tAGGCAGAGATG--ACAGtcatact	--	-	-	-	-	-	-	-	-	--
miR-11990-z	MSTRG.21503	262	286	-19.7	aTCCGTCTCCTTACGGaagaaacta	x||||||||xx|||x|xxxxxxxxx	tAGGCAGAG--ATGACagtcatact	MRPL11	39S ribosomal protein L11, mitochondrial isoform X1 [Panthera tigris]	Genetic Information Processing	Translation	ko03010//Ribosome	K02867	GO:0000313//organellar ribosome;GO:0019866//organelle inner membrane;GO:0043231//intracellular membrane-bounded organelle	GO:0003723//RNA binding;GO:0005198//structural molecule activity	GO:0006413//translational initiation;GO:0006414//translational elongation;GO:0006415//translational termination	--
miR-11990-z	MSTRG.21507	1317	1338	-16.94	gTCCGTCTGGTC-GTCccgtcgt	x|||||||xxx|x|||xxxxxxx	tAGGCAGAGATGACAGtcatact	Slc29a2	equilibrative nucleoside transporter 2 isoform X2 [Bos taurus]	Human Diseases	Substance dependence	ko05034//Alcoholism	K15014	GO:0016021//integral component of membrane;GO:0031090//organelle membrane;GO:0043231//intracellular membrane-bounded organelle;GO:0043232//intracellular non-membrane-bounded organelle	GO:0015932//nucleobase-containing compound transmembrane transporter activity	GO:0006725//cellular aromatic compound metabolic process;GO:0006863//purine nucleobase transport;GO:0007589//body fluid secretion;GO:0015855//pyrimidine nucleobase transport;GO:0015864//pyrimidine nucleoside transport;GO:0032868//response to insulin;GO:0044763//single-organism cellular process	--
miR-11990-z	MSTRG.22162	930	950	-20.27	tTCCGTCTCGG--GTCCGggctc	x||||||||x:xx|||x|xxxxx	tAGGCAGAGATGACAGTCatact	--	translation initiation factor IF-2-like [Cervus canadensis]	-	-	-	-	-	-	-	--
miR-11990-z	MSTRG.2728	361	384	-13.85	cTCCGTCTCCCTTATTCCTTATag	x||||||||xx:|x|x|xx|||xx	tAGGCAGAGATGACA-GTCATAct	--	-	-	-	-	-	-	-	-	--
miR-11990-z	MSTRG.27704	1425	1447	-16.24	tTCCGTCTGTACcttacctacat	x|||||||x|||xxxxxxxxxxx	tAGGCAGAGATGacagtcatact	pol	PREDICTED: endogenous retrovirus group K member 19 Env polyprotein-like [Bison bison bison]	-	-	-	-	GO:0019012//virion;GO:0030131//clathrin adaptor complex;GO:0030135//coated vesicle;GO:0036464//cytoplasmic ribonucleoprotein granule	GO:0000175//3'-5'-exoribonuclease activity;GO:0008289//lipid binding;GO:0015631//tubulin binding;GO:0016740//transferase activity;GO:0043167//ion binding;GO:0044822//poly(A) RNA binding	GO:0001649//osteoblast differentiation;GO:0002237//response to molecule of bacterial origin;GO:0006259//DNA metabolic process;GO:0007009//plasma membrane organization;GO:0007623//circadian rhythm;GO:0022618//ribonucleoprotein complex assembly;GO:0043488//regulation of mRNA stability;GO:0045597//positive regulation of cell differentiation;GO:0045807//positive regulation of endocytosis;GO:0090501//…	--
miR-11990-z	MSTRG.3598	108	128	-14.05	cTCCGTCT--GCGGTTCGTcctc	x|||||||xx:|x||:x||xxxx	tAGGCAGAGATGACAGTCAtact	OPTN	PREDICTED: optineurin isoform X2 [Bos mutus]	Cellular Processes	Transport and catabolism	ko04137//Mitophagy - animal	K19946	-	-	-	--
miR-11990-z	MSTRG.3753	202	223	-24.68	gTCCGTCTCTACGGAC-GTATtc	x|||||||||||x|x|x||||xx	tAGGCAGAGATGACAGTCATAct	WAC	WW domain-containing adapter protein with coiled-coil isoform X2 [Bos taurus]	-	-	-	-	GO:0016604//nuclear body;GO:0030529//intracellular ribonucleoprotein complex	GO:0001099//basal RNA polymerase II transcription machinery binding	GO:0000077//DNA damage checkpoint;GO:0006355//regulation of transcription, DNA-templated;GO:0006513//protein monoubiquitination;GO:0010508//positive regulation of autophagy;GO:0031330//negative regulation of cellular catabolic process;GO:0033523//histone H2B ubiquitination	--
miR-11990-z	MSTRG.4478	5351	5376	-16.96	gTCCGTCTAACAAGTGGTCGactcgg	x|||||||xx|x|x||x||:xxxxxx	tAGGCAGA--GATGAC-AGTcatact	F52C9.6	endonuclease-reverse transcriptase [Babesia ovata]	-	-	-	-	-	-	-	--
miR-11990-z	MSTRG.5822	1601	1623	-15.82	tTCCGTCTTTTCATTCGacgtcg	x|||||||:|x|xx||:xxxxxx	tAGGCAGAGATGACAGTcatact	--	-	-	-	-	-	-	-	-	--
miR-186-y	MSTRG.18801	1809	1830	-17.6	gGGGTTTCCTCTGGGCGGAgga	x||||||||x||x::x::|xxx	gCCCAAAGGTGAATTTTTTgaa	MKI67	PREDICTED: antigen KI-67 [Bos mutus]	-	-	-	-	GO:0005694//chromosome;GO:0043231//intracellular membrane-bounded organelle	GO:0003723//RNA binding;GO:0005515//protein binding;GO:0036094//small molecule binding	GO:0000280//nuclear division;GO:0009408//response to heat;GO:0010033//response to organic substance;GO:0031099//regeneration;GO:0044260//cellular macromolecule metabolic process;GO:0044763//single-organism cellular process;GO:1903510//mucopolysaccharide metabolic process	--
miR-186-y	MSTRG.29222	2567	2589	-16.94	cGGGTTTCGAGATCCAAGGACcc	x|||||||x|xx|xx||::||xx	gCCCAAAGGTGAAT-TTTTTGaa	--	serine/arginine repetitive matrix protein 1-like [Zalophus californianus]	-	-	-	-	GO:0042579//microbody	GO:0005515//protein binding;GO:0016647//oxidoreductase activity, acting on the CH-NH group of donors, oxygen as acceptor	GO:0006596//polyamine biosynthetic process;GO:0006598//polyamine catabolic process;GO:0031328//positive regulation of cellular biosynthetic process;GO:0044710//single-organism metabolic process;GO:0051234//establishment of localization	--
miR-186-y	MSTRG.4090	8816	8836	-17.81	gGGGTTTCGACG-AGAGGTCct	x|||||||x||xx|:|::x|xx	gCCCAAAGGTGAATTTTTTGaa	--	PREDICTED: basic salivary proline-rich protein 1-like isoform X2 [Bos indicus]	-	-	-	-	GO:0031224//intrinsic component of membrane;GO:0044421//extracellular region part	GO:0043169//cation binding;GO:0060089//molecular transducer activity	GO:0007162//negative regulation of cell adhesion;GO:0007169//transmembrane receptor protein tyrosine kinase signaling pathway;GO:0007606//sensory perception of chemical stimulus;GO:0010596//negative regulation of endothelial cell migration;GO:0045765//regulation of angiogenesis;GO:0048869//cellular developmental process;GO:0050922//negative regulation of chemotaxis	--
miR-186-y	MSTRG.4101	528	548	-12.94	gGGGTTTC-ACcggacccttca	x|||||||x||xxxxxxxxxxx	gCCCAAAGGTGaattttttgaa	--	-	-	-	-	-	-	-	-	--
miR-186-y	MSTRG.4578	324	348	-18.28	cGGGTTTCATAACCTTGAAGtcgaa	x|||||||x:|xx|||:||:xxxxx	gCCCAAAG-GT--GAATTTTttgaa	--	reverse transcriptase-like [Bos taurus]	-	-	-	-	GO:0043231//intracellular membrane-bounded organelle	GO:0003723//RNA binding	GO:0006464//cellular protein modification process;GO:0015980//energy derivation by oxidation of organic compounds	--
miR-186-y	MSTRG.6869	1139	1160	-16.79	gGGGTTTCCGTTgttgtcactg	x||||||||::|xxxxxxxxxx	gCCCAAAGGTGAattttttgaa	ABCC4	multidrug resistance-associated protein 4-like isoform X1 [Bos indicus x Bos taurus]	Environmental Information Processing;Organismal Systems;Environmental Information Processing;Human Diseases	Signal transduction;Digestive system;Membrane transport;Drug resistance: antineoplastic	ko04024//cAMP signaling pathway;ko04976//Bile secretion;ko02010//ABC transporters;ko01523//Antifolate resistance	K05673;K05673;K05673;K05673	GO:0030667//secretory granule membrane;GO:0031224//intrinsic component of membrane	GO:0015405//P-P-bond-hydrolysis-driven transmembrane transporter activity;GO:0016616//oxidoreductase activity, acting on the CH-OH group of donors, NAD or NADP as acceptor;GO:0016887//ATPase activity;GO:0032550//purine ribonucleoside binding	GO:0001775//cell activation;GO:0006811//ion transport;GO:0007599//hemostasis;GO:0008284//positive regulation of cell proliferation;GO:0009719//response to endogenous stimulus;GO:0010033//response to organic substance;GO:0015893//drug transport;GO:0044710//single-organism metabolic process	--
miR-186-y	MSTRG.7424	417	438	-14.86	gGGGTTTCgccgccgacgtcgg	x|||||||xxxxxxxxxxxxxx	gCCCAAAGgtgaattttttgaa	--	PREDICTED: gametogenetin-like [Capra hircus]	-	-	-	-	-	-	-	--
miR-186-y	MSTRG.9421	834	855	-16.6	gGGGTTTCCAaccgcagtggag	x|||||||||xxxxxxxxxxxx	gCCCAAAGGTgaattttttgaa	--	thymocyte nuclear protein 1 isoform X2 [Odocoileus virginianus texanus]	-	-	-	-	-	-	-	--
miR-200-x	MSTRG.29222	1817	1838	-12.88	tTAGAATGCCATATAGTttctt	x|||||||x|x:x|x||xxxxx	cATCTTACTGGGCAGCAttgga	--	serine/arginine repetitive matrix protein 1-like [Zalophus californianus]	-	-	-	-	GO:0042579//microbody	GO:0005515//protein binding;GO:0016647//oxidoreductase activity, acting on the CH-NH group of donors, oxygen as acceptor	GO:0006596//polyamine biosynthetic process;GO:0006598//polyamine catabolic process;GO:0031328//positive regulation of cellular biosynthetic process;GO:0044710//single-organism metabolic process;GO:0051234//establishment of localization	--
miR-3960-z	MSTRG.21503	350	368	-24.42	cGCCGCCGgaagtccttca	x|||||||xxxxxxxxxxx	gCGGCGGCggcggtggtgg	MRPL11	39S ribosomal protein L11, mitochondrial isoform X1 [Panthera tigris]	Genetic Information Processing	Translation	ko03010//Ribosome	K02867	GO:0000313//organellar ribosome;GO:0019866//organelle inner membrane;GO:0043231//intracellular membrane-bounded organelle	GO:0003723//RNA binding;GO:0005198//structural molecule activity	GO:0006413//translational initiation;GO:0006414//translational elongation;GO:0006415//translational termination	--
miR-3960-z	MSTRG.9565	72	90	-30.23	tGCCGCCGGAGCTGCCGga	x|||||||xx||::||:xx	gCGGCGGCGGCGGTGGTgg	--	protein AHNAK2 [Bubalus bubalis]	Human Diseases	Infectious disease: bacterial	ko05132//Salmonella infection	K23934	GO:0005886//plasma membrane;GO:0043229//intracellular organelle;GO:0044422//organelle part;GO:0044444//cytoplasmic part	-	-	--
miR-12000-z	MSTRG.27704	1555	1576	-12.35	cACTTAGGcaaacacgtgtagg	x|||||||xxxxxxxxxxxxxx	tTGAATCCacagatgtgagact	pol	PREDICTED: endogenous retrovirus group K member 19 Env polyprotein-like [Bison bison bison]	-	-	-	-	GO:0019012//virion;GO:0030131//clathrin adaptor complex;GO:0030135//coated vesicle;GO:0036464//cytoplasmic ribonucleoprotein granule	GO:0000175//3'-5'-exoribonuclease activity;GO:0008289//lipid binding;GO:0015631//tubulin binding;GO:0016740//transferase activity;GO:0043167//ion binding;GO:0044822//poly(A) RNA binding	GO:0001649//osteoblast differentiation;GO:0002237//response to molecule of bacterial origin;GO:0006259//DNA metabolic process;GO:0007009//plasma membrane organization;GO:0007623//circadian rhythm;GO:0022618//ribonucleoprotein complex assembly;GO:0043488//regulation of mRNA stability;GO:0045597//positive regulation of cell differentiation;GO:0045807//positive regulation of endocytosis;GO:0090501//…	--
miR-12000-z	MSTRG.28465	450	470	-12.79	aACTTAGGACCC-ACCTTCaga	x|||||||xxx|x||x:||xxx	tTGAATCCACAGATGTGAGact	--	Barrier-to-autointegration factor [Varanus komodoensis]	Human Diseases	Infectious disease: viral	ko05168//Herpes simplex virus 1 infection	K09228	GO:0031224//intrinsic component of membrane;GO:0042579//microbody	GO:0005515//protein binding;GO:0016647//oxidoreductase activity, acting on the CH-NH group of donors, oxygen as acceptor;GO:0043168//anion binding	GO:0006596//polyamine biosynthetic process;GO:0006598//polyamine catabolic process;GO:0031328//positive regulation of cellular biosynthetic process;GO:0044710//single-organism metabolic process	--
miR-12000-z	MSTRG.5822	625	647	-18.92	aACTTAGGTCGACTCTACTacag	x||||||||x|x||x:|||xxxx	tTGAATCCA-CAGATGTGAgact	--	-	-	-	-	-	-	-	-	--
miR-12000-z	MSTRG.6898	555	575	-15.62	gACTTAGGTTTTGGAAC-CTag	x||||||||x|:x:x||x||xx	tTGAATCCACAGATGTGAGAct	ABCC4	multidrug resistance-associated protein 4-like isoform X3 [Bos indicus x Bos taurus]	Environmental Information Processing;Organismal Systems;Environmental Information Processing;Human Diseases	Signal transduction;Digestive system;Membrane transport;Drug resistance: antineoplastic	ko04024//cAMP signaling pathway;ko04976//Bile secretion;ko02010//ABC transporters;ko01523//Antifolate resistance	K05673;K05673;K05673;K05673	GO:0030667//secretory granule membrane;GO:0031224//intrinsic component of membrane	GO:0005253//anion channel activity;GO:0016616//oxidoreductase activity, acting on the CH-OH group of donors, NAD or NADP as acceptor;GO:0032550//purine ribonucleoside binding;GO:0042626//ATPase activity, coupled to transmembrane movement of substances	GO:0001775//cell activation;GO:0006821//chloride transport;GO:0007599//hemostasis;GO:0008284//positive regulation of cell proliferation;GO:0009719//response to endogenous stimulus;GO:0010033//response to organic substance;GO:0015893//drug transport;GO:0044710//single-organism metabolic process	--
miR-12000-z	MSTRG.7032	1041	1062	-13.19	gACTTAGGGGaaagcccggagg	x|||||||x|xxxxxxxxxxxx	tTGAATCCACagatgtgagact	--	arf-GAP with dual PH domain-containing protein 2 isoform X1 [Cervus canadensis]	-	-	-	-	-	GO:0016647//oxidoreductase activity, acting on the CH-NH group of donors, oxygen as acceptor	GO:0006598//polyamine catabolic process;GO:0010467//gene expression;GO:0044238//primary metabolic process;GO:0044271//cellular nitrogen compound biosynthetic process;GO:1901576//organic substance biosynthetic process	--
miR-2331-y	MSTRG.10777	1687	1709	-17.04	tGGGACGTTAGacccgctcaccc	x|||||||:x|xxxxxxxxxxxx	aCCCTGCAGCCaaagaagctact	--	GRAM domain-containing protein 2B isoform X2 [Bos taurus]	Cellular Processes	Transport and catabolism	ko04146//Peroxisome	K00308	GO:0005737//cytoplasm;GO:0043231//intracellular membrane-bounded organelle	GO:0005515//protein binding;GO:0016647//oxidoreductase activity, acting on the CH-NH group of donors, oxygen as acceptor	GO:0006596//polyamine biosynthetic process;GO:0006598//polyamine catabolic process;GO:0009653//anatomical structure morphogenesis;GO:0016043//cellular component organization;GO:0031325//positive regulation of cellular metabolic process;GO:0031326//regulation of cellular biosynthetic process;GO:0044763//single-organism cellular process;GO:0048523//negative regulation of cellular process;GO:0048731…	--
miR-2331-y	MSTRG.15958	1333	1355	-17.47	tGGGACGTTcaccccgttccgac	x|||||||:xxxxxxxxxxxxxx	aCCCTGCAGccaaagaagctact	--	-	-	-	-	-	-	-	-	--
miR-2331-y	MSTRG.17502	452	474	-14.95	tGGGACGTacagacagacaaacc	x|||||||xxxxxxxxxxxxxxx	aCCCTGCAgccaaagaagctact	C4A	PREDICTED: complement C4-B-like isoform X1 [Bison bison bison]	Human Diseases;Human Diseases;Organismal Systems;Human Diseases	Immune disease;Infectious disease: bacterial;Immune system;Infectious disease: bacterial	ko05322//Systemic lupus erythematosus;ko05150//Staphylococcus aureus infection;ko04610//Complement and coagulation cascades;ko05133//Pertussis	K03989;K03989;K03989;K03989	GO:0016020//membrane;GO:0031988//membrane-bounded vesicle;GO:0044217//other organism part	GO:0001846//opsonin binding;GO:0061135//endopeptidase regulator activity	GO:0002237//response to molecule of bacterial origin;GO:0002673//regulation of acute inflammatory response;GO:0006956//complement activation;GO:0010466//negative regulation of peptidase activity;GO:0019724//B cell mediated immunity;GO:0043277//apoptotic cell clearance	--
miR-2331-y	MSTRG.27704	652	674	-15.18	cGGGACGTGTCGTTGTGCTAaaa	x|||||||xxxx||x|x|x|xxx	aCCCTGCAGCCAAAGAAGCTact	pol	PREDICTED: endogenous retrovirus group K member 19 Env polyprotein-like [Bison bison bison]	-	-	-	-	GO:0019012//virion;GO:0030131//clathrin adaptor complex;GO:0030135//coated vesicle;GO:0036464//cytoplasmic ribonucleoprotein granule	GO:0000175//3'-5'-exoribonuclease activity;GO:0008289//lipid binding;GO:0015631//tubulin binding;GO:0016740//transferase activity;GO:0043167//ion binding;GO:0044822//poly(A) RNA binding	GO:0001649//osteoblast differentiation;GO:0002237//response to molecule of bacterial origin;GO:0006259//DNA metabolic process;GO:0007009//plasma membrane organization;GO:0007623//circadian rhythm;GO:0022618//ribonucleoprotein complex assembly;GO:0043488//regulation of mRNA stability;GO:0045597//positive regulation of cell differentiation;GO:0045807//positive regulation of endocytosis;GO:0090501//…	--
miR-2331-y	MSTRG.4478	5739	5762	-22.37	tGGGACGTCACCTCCTTCTGAcgg	x||||||||xxx|x||||x||xxx	aCCCTGCAGCCAAAGAAG-CTact	F52C9.6	endonuclease-reverse transcriptase [Babesia ovata]	-	-	-	-	-	-	-	--
miR-2331-y	MSTRG.9567	697	719	-19.77	tGGGACGTCGcagaagcaccccc	x|||||||||xxxxxxxxxxxxx	aCCCTGCAGCcaaagaagctact	AHNAK2	protein AHNAK2 isoform X1 [Bos indicus x Bos taurus]	Human Diseases	Infectious disease: bacterial	ko05132//Salmonella infection	K23934	GO:0012506//vesicle membrane;GO:0031674//I band;GO:0044459//plasma membrane part	-	GO:0007009//plasma membrane organization	--
miR-2331-y	MSTRG.9896	167	189	-19.18	cGGGACGTCcccggaggcccgcg	x||||||||xxxxxxxxxxxxxx	aCCCTGCAGccaaagaagctact	--	IQ motif and ankyrin repeat domain-containing protein 1 isoform X4 [Cervus canadensis]	-	-	-	-	-	-	-	--
miR-10298-z	MSTRG.18801	1869	1886	-17.43	aAACTCTCCACAcaaccc	x||||||||x||xxxxxx	tTTGAGAGGAGTtgaccc	MKI67	PREDICTED: antigen KI-67 [Bos mutus]	-	-	-	-	GO:0005694//chromosome;GO:0043231//intracellular membrane-bounded organelle	GO:0003723//RNA binding;GO:0005515//protein binding;GO:0036094//small molecule binding	GO:0000280//nuclear division;GO:0009408//response to heat;GO:0010033//response to organic substance;GO:0031099//regeneration;GO:0044260//cellular macromolecule metabolic process;GO:0044763//single-organism cellular process;GO:1903510//mucopolysaccharide metabolic process	--
miR-10298-z	MSTRG.29222	3393	3410	-16.67	gAACTCTCTGTAcgaggc	x|||||||:x:|xxxxxx	tTTGAGAGGAGTtgaccc	--	serine/arginine repetitive matrix protein 1-like [Zalophus californianus]	-	-	-	-	GO:0042579//microbody	GO:0005515//protein binding;GO:0016647//oxidoreductase activity, acting on the CH-NH group of donors, oxygen as acceptor	GO:0006596//polyamine biosynthetic process;GO:0006598//polyamine catabolic process;GO:0031328//positive regulation of cellular biosynthetic process;GO:0044710//single-organism metabolic process;GO:0051234//establishment of localization	--
miR-10298-z	MSTRG.4090	15940	15957	-18.3	gAACTCTCCCCCAgggtg	x||||||||x|x|xxxxx	tTTGAGAGGAGTTgaccc	--	PREDICTED: basic salivary proline-rich protein 1-like isoform X2 [Bos indicus]	-	-	-	-	GO:0031224//intrinsic component of membrane;GO:0044421//extracellular region part	GO:0043169//cation binding;GO:0060089//molecular transducer activity	GO:0007162//negative regulation of cell adhesion;GO:0007169//transmembrane receptor protein tyrosine kinase signaling pathway;GO:0007606//sensory perception of chemical stimulus;GO:0010596//negative regulation of endothelial cell migration;GO:0045765//regulation of angiogenesis;GO:0048869//cellular developmental process;GO:0050922//negative regulation of chemotaxis	--
miR-10298-z	MSTRG.6869	234	250	-17.45	gAACTCTC-TGACTTGgt	x|||||||x|x|x:||xx	tTTGAGAGGAGTTGACcc	ABCC4	multidrug resistance-associated protein 4-like isoform X1 [Bos indicus x Bos taurus]	Environmental Information Processing;Organismal Systems;Environmental Information Processing;Human Diseases	Signal transduction;Digestive system;Membrane transport;Drug resistance: antineoplastic	ko04024//cAMP signaling pathway;ko04976//Bile secretion;ko02010//ABC transporters;ko01523//Antifolate resistance	K05673;K05673;K05673;K05673	GO:0030667//secretory granule membrane;GO:0031224//intrinsic component of membrane	GO:0015405//P-P-bond-hydrolysis-driven transmembrane transporter activity;GO:0016616//oxidoreductase activity, acting on the CH-OH group of donors, NAD or NADP as acceptor;GO:0016887//ATPase activity;GO:0032550//purine ribonucleoside binding	GO:0001775//cell activation;GO:0006811//ion transport;GO:0007599//hemostasis;GO:0008284//positive regulation of cell proliferation;GO:0009719//response to endogenous stimulus;GO:0010033//response to organic substance;GO:0015893//drug transport;GO:0044710//single-organism metabolic process	--
miR-10298-z	MSTRG.9421	1251	1268	-12.64	aAACTCTCTACCAgatca	x|||||||:x|x|xxxxx	tTTGAGAGGAGTTgaccc	--	thymocyte nuclear protein 1 isoform X2 [Odocoileus virginianus texanus]	-	-	-	-	-	-	-	--
miR-674-y	MSTRG.10777	1593	1612	-13.73	tTGTCGAGTCTTGGaacgag	x|||||||xx|x|:xxxxxx	cACAGCTCCCATCTcagaac	--	GRAM domain-containing protein 2B isoform X2 [Bos taurus]	Cellular Processes	Transport and catabolism	ko04146//Peroxisome	K00308	GO:0005737//cytoplasm;GO:0043231//intracellular membrane-bounded organelle	GO:0005515//protein binding;GO:0016647//oxidoreductase activity, acting on the CH-NH group of donors, oxygen as acceptor	GO:0006596//polyamine biosynthetic process;GO:0006598//polyamine catabolic process;GO:0009653//anatomical structure morphogenesis;GO:0016043//cellular component organization;GO:0031325//positive regulation of cellular metabolic process;GO:0031326//regulation of cellular biosynthetic process;GO:0044763//single-organism cellular process;GO:0048523//negative regulation of cellular process;GO:0048731…	--
miR-674-y	MSTRG.15080	286	305	-19.79	cTGTCGAGGGacaccggggg	x|||||||||xxxxxxxxxx	cACAGCTCCCatctcagaac	--	PREDICTED: immunoglobulin superfamily member 23 [Bos mutus]	-	-	-	-	-	-	-	--
miR-674-y	MSTRG.17500	395	414	-24.59	gTGTCGAGGGTcccggtggt	x||||||||||xxxxxxxxx	cACAGCTCCCAtctcagaac	C4B	complement C4 isoform X1 [Bos taurus]	Human Diseases;Human Diseases;Organismal Systems;Human Diseases	Immune disease;Infectious disease: bacterial;Immune system;Infectious disease: bacterial	ko05322//Systemic lupus erythematosus;ko05150//Staphylococcus aureus infection;ko04610//Complement and coagulation cascades;ko05133//Pertussis	K03989;K03989;K03989;K03989	GO:0016020//membrane;GO:0031988//membrane-bounded vesicle;GO:0044217//other organism part	GO:0001846//opsonin binding;GO:0061135//endopeptidase regulator activity	GO:0002237//response to molecule of bacterial origin;GO:0002673//regulation of acute inflammatory response;GO:0006956//complement activation;GO:0010466//negative regulation of peptidase activity;GO:0019724//B cell mediated immunity;GO:0043277//apoptotic cell clearance	--
miR-6715-z	MSTRG.14602	621	640	-19.07	aGTCCGTGG-GGTCCGAgggg	x|||||||xx||||x:|xxxx	aCAGGCACGGCCAGTTTgagc	ZNF671	zinc finger protein 28 homolog [Zalophus californianus]	Human Diseases	Infectious disease: viral	ko05168//Herpes simplex virus 1 infection	K09228	-	-	-	--
miR-6715-z	MSTRG.15630	1046	1066	-18.91	gGTCCGTGGAGGTaggtaccc	x|||||||xx|||xxxxxxxx	aCAGGCACGGCCAgtttgagc	--	protein N-lysine methyltransferase METTL21A isoform X3 [Ovis aries]	-	-	-	-	GO:0031224//intrinsic component of membrane;GO:0044421//extracellular region part	GO:0043169//cation binding;GO:0060089//molecular transducer activity	GO:0007162//negative regulation of cell adhesion;GO:0007169//transmembrane receptor protein tyrosine kinase signaling pathway;GO:0007606//sensory perception of chemical stimulus;GO:0010596//negative regulation of endothelial cell migration;GO:0045765//regulation of angiogenesis;GO:0048869//cellular developmental process;GO:0050922//negative regulation of chemotaxis	--
miR-6715-z	MSTRG.21179	1313	1334	-17.96	gGTCCGTGGGCGTTCACACcct	x|||||||xx||x|||x||xxx	aCAGGCACG-GCCAGTTTGagc	--	LOW QUALITY PROTEIN: collagen alpha-1(IV) chain-like [Phocoena sinus]	-	-	-	-	-	-	-	--
miR-6715-z	MSTRG.29222	3665	3685	-21.12	cGTCCGTGTTTTCCAGACcca	x|||||||::xxx||:||xxx	aCAGGCACGGCCAGTTTGagc	--	serine/arginine repetitive matrix protein 1-like [Zalophus californianus]	-	-	-	-	GO:0042579//microbody	GO:0005515//protein binding;GO:0016647//oxidoreductase activity, acting on the CH-NH group of donors, oxygen as acceptor	GO:0006596//polyamine biosynthetic process;GO:0006598//polyamine catabolic process;GO:0031328//positive regulation of cellular biosynthetic process;GO:0044710//single-organism metabolic process;GO:0051234//establishment of localization	--
miR-6715-z	MSTRG.29423	833	852	-24.82	gGTCCGTGC-GGACGAACcac	x||||||||x||x|:|||xxx	aCAGGCACGGCCAGTTTGagc	FBN3	fibrillin-3 [Bos taurus]	-	-	-	-	-	-	GO:0007507//heart development;GO:0009887//organ morphogenesis;GO:0009987//cellular process	--
miR-6715-z	MSTRG.31466	174	196	-24.15	cGTCCGTGTCCGGCGCCAGCccg	x|||||||x||||xx|x|:|xxx	aCAGGCAC-GGCCA-GTTTGagc	LONRF2	LOW QUALITY PROTEIN: LON peptidase N-terminal domain and RING finger protein 2 [Bos taurus]	-	-	-	-	-	GO:0046914//transition metal ion binding	GO:0019538//protein metabolic process	--
miR-6715-z	MSTRG.4090	3672	3692	-20.63	gGTCCGTGG-GGTAATGACTac	x|||||||xx|||x|x:|||xx	aCAGGCACGGCCAGT-TTGAgc	--	PREDICTED: basic salivary proline-rich protein 1-like isoform X2 [Bos indicus]	-	-	-	-	GO:0031224//intrinsic component of membrane;GO:0044421//extracellular region part	GO:0043169//cation binding;GO:0060089//molecular transducer activity	GO:0007162//negative regulation of cell adhesion;GO:0007169//transmembrane receptor protein tyrosine kinase signaling pathway;GO:0007606//sensory perception of chemical stimulus;GO:0010596//negative regulation of endothelial cell migration;GO:0045765//regulation of angiogenesis;GO:0048869//cellular developmental process;GO:0050922//negative regulation of chemotaxis	--
miR-6715-z	MSTRG.4578	810	832	-27.92	tGTCCGTGTCGGTTCTAAAATtg	x|||||||:||||:xx|||x|xx	aCAGGCACGGCCAG--TTTGAgc	--	reverse transcriptase-like [Bos taurus]	-	-	-	-	GO:0043231//intracellular membrane-bounded organelle	GO:0003723//RNA binding	GO:0006464//cellular protein modification process;GO:0015980//energy derivation by oxidation of organic compounds	--
miR-6715-z	MSTRG.6690	522	540	-23.51	cGTCCGTGTC--TCGGACccg	x|||||||:|xx||::||xxx	aCAGGCACGGCCAGTTTGagc	--	uncharacterized protein LOC113906999 [Bos indicus x Bos taurus]	-	-	-	-	-	-	-	--
miR-2766-y	MSTRG.22496	945	964	-12.34	cGTCAGAACtaaggtcgaac	x||||||||xxxxxxxxxxx	tCAGTCTTGtcgaatggtgg	--	endonuclease-reverse transcriptase [Babesia ovata]	-	-	-	-	GO:0031252//cell leading edge;GO:0070161//anchoring junction	GO:0003779//actin binding;GO:0050839//cell adhesion molecule binding	GO:0010468//regulation of gene expression;GO:0098602//single organism cell adhesion	--
miR-2766-y	MSTRG.29222	2224	2243	-15.02	gGTCAGAAGGGGTctgtgtg	x|||||||x:|x|xxxxxxx	tCAGTCTTGTCGAatggtgg	--	serine/arginine repetitive matrix protein 1-like [Zalophus californianus]	-	-	-	-	GO:0042579//microbody	GO:0005515//protein binding;GO:0016647//oxidoreductase activity, acting on the CH-NH group of donors, oxygen as acceptor	GO:0006596//polyamine biosynthetic process;GO:0006598//polyamine catabolic process;GO:0031328//positive regulation of cellular biosynthetic process;GO:0044710//single-organism metabolic process;GO:0051234//establishment of localization	--
miR-2766-y	MSTRG.4090	1839	1858	-21.04	tGTCAGAATAGTTCACTtaa	x|||||||:||:|x||:xxx	tCAGTCTTGTCGAATGGtgg	--	PREDICTED: basic salivary proline-rich protein 1-like isoform X2 [Bos indicus]	-	-	-	-	GO:0031224//intrinsic component of membrane;GO:0044421//extracellular region part	GO:0043169//cation binding;GO:0060089//molecular transducer activity	GO:0007162//negative regulation of cell adhesion;GO:0007169//transmembrane receptor protein tyrosine kinase signaling pathway;GO:0007606//sensory perception of chemical stimulus;GO:0010596//negative regulation of endothelial cell migration;GO:0045765//regulation of angiogenesis;GO:0048869//cellular developmental process;GO:0050922//negative regulation of chemotaxis	--
miR-2328-y	MSTRG.29423	1445	1462	-34.7	tGCAGCCCCAGCTCCCgt	x||||||||x:|:|||xx	gCGTCGGGGGTGGGGGcc	FBN3	fibrillin-3 [Bos taurus]	-	-	-	-	-	-	GO:0007507//heart development;GO:0009887//organ morphogenesis;GO:0009987//cellular process	--
miR-2328-y	MSTRG.6690	235	251	-30.95	gGCAGCCCC-GCCCCgac	x||||||||x:||||xxx	gCGTCGGGGGTGGGGgcc	--	uncharacterized protein LOC113906999 [Bos indicus x Bos taurus]	-	-	-	-	-	-	-	--
miR-2454-y	MSTRG.18801	1787	1814	-30.58	gGAGGAGAAACGTCGGTACGGGAGGtag	x|||||||xxxx:|||xx||:||||xxx	tCTCCTCT----GGCC--GCTCTCCtcc	MKI67	PREDICTED: antigen KI-67 [Bos mutus]	-	-	-	-	GO:0005694//chromosome;GO:0043231//intracellular membrane-bounded organelle	GO:0003723//RNA binding;GO:0005515//protein binding;GO:0036094//small molecule binding	GO:0000280//nuclear division;GO:0009408//response to heat;GO:0010033//response to organic substance;GO:0031099//regeneration;GO:0044260//cellular macromolecule metabolic process;GO:0044763//single-organism cellular process;GO:1903510//mucopolysaccharide metabolic process	--
miR-2454-y	MSTRG.1998	1395	1416	-24.09	cGAGGAGACTCCCCTGGGGAca	x||||||||:xx|xx|:|||xx	tCTCCTCTGGCCGCTCTCCTcc	DACT2	dapper homolog 2 [Bos indicus x Bos taurus]	-	-	-	-	GO:0043231//intracellular membrane-bounded organelle	GO:0019901//protein kinase binding	GO:0000904//cell morphogenesis involved in differentiation;GO:0007155//cell adhesion;GO:0032926//negative regulation of activin receptor signaling pathway;GO:0072044//collecting duct development	--
miR-2454-y	MSTRG.21307	225	246	-24.57	cGAGGAGAGTGTCGAGTGGccg	x|||||||x:|x||||x||xxx	tCTCCTCTGGCCGCTCTCCtcc	MRGPRF	mas-related G-protein coupled receptor member F isoform X1 [Neogale vison]	-	-	-	-	GO:0031224//intrinsic component of membrane;GO:0031988//membrane-bounded vesicle	GO:0004888//transmembrane signaling receptor activity	GO:0007166//cell surface receptor signaling pathway	--
miR-2454-y	MSTRG.29222	707	728	-32.9	aGAGGAGACCTCCCGGAGGGgt	x|||||||||xx|x:||||:xx	tCTCCTCTGGCCGCTCTCCTcc	--	serine/arginine repetitive matrix protein 1-like [Zalophus californianus]	-	-	-	-	GO:0042579//microbody	GO:0005515//protein binding;GO:0016647//oxidoreductase activity, acting on the CH-NH group of donors, oxygen as acceptor	GO:0006596//polyamine biosynthetic process;GO:0006598//polyamine catabolic process;GO:0031328//positive regulation of cellular biosynthetic process;GO:0044710//single-organism metabolic process;GO:0051234//establishment of localization	--
miR-2454-y	MSTRG.4090	8764	8787	-27.39	gGAGGAGAAGTCGGGTCGGGGAct	x|||||||xx:|||xxx|:|||xx	tCTCCTCT--GGCCGCTCTCCTcc	--	PREDICTED: basic salivary proline-rich protein 1-like isoform X2 [Bos indicus]	-	-	-	-	GO:0031224//intrinsic component of membrane;GO:0044421//extracellular region part	GO:0043169//cation binding;GO:0060089//molecular transducer activity	GO:0007162//negative regulation of cell adhesion;GO:0007169//transmembrane receptor protein tyrosine kinase signaling pathway;GO:0007606//sensory perception of chemical stimulus;GO:0010596//negative regulation of endothelial cell migration;GO:0045765//regulation of angiogenesis;GO:0048869//cellular developmental process;GO:0050922//negative regulation of chemotaxis	--
miR-2454-y	MSTRG.4578	692	717	-22.41	cGAGGAGACAGGTACCGTAAAGGGtc	x||||||||x||xxx||x|x|||:xx	tCTCCTCTGGCC---GC-TCTCCTcc	--	reverse transcriptase-like [Bos taurus]	-	-	-	-	GO:0043231//intracellular membrane-bounded organelle	GO:0003723//RNA binding	GO:0006464//cellular protein modification process;GO:0015980//energy derivation by oxidation of organic compounds	--
miR-2454-y	MSTRG.6690	932	953	-24.55	gGAGGAGACGGGTctgcctggc	x||||||||x||:xxxxxxxxx	tCTCCTCTGGCCGctctcctcc	--	uncharacterized protein LOC113906999 [Bos indicus x Bos taurus]	-	-	-	-	-	-	-	--
miR-2454-y	MSTRG.9421	655	676	-20.06	cGAGGAGACAGGTaccttaaga	x||||||||x||:xxxxxxxxx	tCTCCTCTGGCCGctctcctcc	--	thymocyte nuclear protein 1 isoform X2 [Odocoileus virginianus texanus]	-	-	-	-	-	-	-	--
miR-462-x	MSTRG.15630	734	755	-10.36	tTTGCCTTacaaggactccagg	x|||||||xxxxxxxxxxxxxx	tAACGGAAcccataatgcagct	--	protein N-lysine methyltransferase METTL21A isoform X3 [Ovis aries]	-	-	-	-	GO:0031224//intrinsic component of membrane;GO:0044421//extracellular region part	GO:0043169//cation binding;GO:0060089//molecular transducer activity	GO:0007162//negative regulation of cell adhesion;GO:0007169//transmembrane receptor protein tyrosine kinase signaling pathway;GO:0007606//sensory perception of chemical stimulus;GO:0010596//negative regulation of endothelial cell migration;GO:0045765//regulation of angiogenesis;GO:0048869//cellular developmental process;GO:0050922//negative regulation of chemotaxis	--
miR-1246-z	MSTRG.18801	1495	1512	-16.36	aAACTAAAGGTC-CGTTct	x|||||||:::|x|||:xx	aTTGATTTTTGGAGCAGgg	MKI67	PREDICTED: antigen KI-67 [Bos mutus]	-	-	-	-	GO:0005694//chromosome;GO:0043231//intracellular membrane-bounded organelle	GO:0003723//RNA binding;GO:0005515//protein binding;GO:0036094//small molecule binding	GO:0000280//nuclear division;GO:0009408//response to heat;GO:0010033//response to organic substance;GO:0031099//regeneration;GO:0044260//cellular macromolecule metabolic process;GO:0044763//single-organism cellular process;GO:1903510//mucopolysaccharide metabolic process	--
miR-1246-z	MSTRG.20070	237	255	-12.32	cAACTAAAA-TGTCGGTCta	x||||||||x:x|||x||xx	aTTGATTTTTGGAGC-AGgg	CCNG1	TPA: cyclin-G1-like [Bos taurus]	Human Diseases;Cellular Processes	Cancer: overview;Cell growth and death	ko05206//MicroRNAs in cancer;ko04115//p53 signaling pathway	K10145;K10145	GO:0043005//neuron projection;GO:0043231//intracellular membrane-bounded organelle;GO:0044297//cell body;GO:0044444//cytoplasmic part	GO:0005515//protein binding	GO:0000280//nuclear division;GO:0007417//central nervous system development;GO:0009719//response to endogenous stimulus;GO:0031572//G2 DNA damage checkpoint;GO:0040007//growth;GO:0042981//regulation of apoptotic process;GO:0048646//anatomical structure formation involved in morphogenesis;GO:0051726//regulation of cell cycle	--
miR-1246-z	MSTRG.4578	272	293	-10.33	cAACTAAAGGAAATCCTGACtg	x|||||||xxx||:|x:|x|xx	aTTGATTT---TTGGAGCAGgg	--	reverse transcriptase-like [Bos taurus]	-	-	-	-	GO:0043231//intracellular membrane-bounded organelle	GO:0003723//RNA binding	GO:0006464//cellular protein modification process;GO:0015980//energy derivation by oxidation of organic compounds	--
miR-509-x	MSTRG.15630	1058	1078	-17.44	cTGACGTCGG-ATGGTCCGTgg	x|||||||x|x|:x||xx||xx	tACTGCAGACGTGGCAATCAtg	--	protein N-lysine methyltransferase METTL21A isoform X3 [Ovis aries]	-	-	-	-	GO:0031224//intrinsic component of membrane;GO:0044421//extracellular region part	GO:0043169//cation binding;GO:0060089//molecular transducer activity	GO:0007162//negative regulation of cell adhesion;GO:0007169//transmembrane receptor protein tyrosine kinase signaling pathway;GO:0007606//sensory perception of chemical stimulus;GO:0010596//negative regulation of endothelial cell migration;GO:0045765//regulation of angiogenesis;GO:0048869//cellular developmental process;GO:0050922//negative regulation of chemotaxis	--
miR-509-x	MSTRG.1998	578	599	-26.76	gTGACGTCGACGCCGgagggtc	x|||||||xx|:|||xxxxxxx	tACTGCAGACGTGGCaatcatg	DACT2	dapper homolog 2 [Bos indicus x Bos taurus]	-	-	-	-	GO:0043231//intracellular membrane-bounded organelle	GO:0019901//protein kinase binding	GO:0000904//cell morphogenesis involved in differentiation;GO:0007155//cell adhesion;GO:0032926//negative regulation of activin receptor signaling pathway;GO:0072044//collecting duct development	--
miR-509-x	MSTRG.20070	158	184	-22.12	cTGACGTCGAGGAGTCGCCATTAGTgg	x|||||||xx|xxxx|:||x|||||xx	tACTGCAGA-C----GTGGCAATCAtg	CCNG1	TPA: cyclin-G1-like [Bos taurus]	Human Diseases;Cellular Processes	Cancer: overview;Cell growth and death	ko05206//MicroRNAs in cancer;ko04115//p53 signaling pathway	K10145;K10145	GO:0043005//neuron projection;GO:0043231//intracellular membrane-bounded organelle;GO:0044297//cell body;GO:0044444//cytoplasmic part	GO:0005515//protein binding	GO:0000280//nuclear division;GO:0007417//central nervous system development;GO:0009719//response to endogenous stimulus;GO:0031572//G2 DNA damage checkpoint;GO:0040007//growth;GO:0042981//regulation of apoptotic process;GO:0048646//anatomical structure formation involved in morphogenesis;GO:0051726//regulation of cell cycle	--
miR-509-x	MSTRG.21307	193	214	-22.03	gTGACGTCGACACCcagactag	x|||||||xx||||xxxxxxxx	tACTGCAGACGTGGcaatcatg	MRGPRF	mas-related G-protein coupled receptor member F isoform X1 [Neogale vison]	-	-	-	-	GO:0031224//intrinsic component of membrane;GO:0031988//membrane-bounded vesicle	GO:0004888//transmembrane signaling receptor activity	GO:0007166//cell surface receptor signaling pathway	--
miR-509-x	MSTRG.31464	10	31	-17.12	gTGACGTCTTCCCCtacccttt	x||||||||x|x||xxxxxxxx	tACTGCAGACGTGGcaatcatg	--	protein N-lysine methyltransferase METTL21A isoform X3 [Ovis aries]	Organismal Systems	Sensory system	ko04742//Taste transduction	K08474	GO:0005576//extracellular region;GO:0031224//intrinsic component of membrane;GO:0044424//intracellular part	GO:0005488//binding;GO:0060089//molecular transducer activity	GO:0001525//angiogenesis;GO:0007166//cell surface receptor signaling pathway;GO:0007606//sensory perception of chemical stimulus;GO:0040013//negative regulation of locomotion;GO:0048523//negative regulation of cellular process;GO:0051241//negative regulation of multicellular organismal process	--
miR-509-x	MSTRG.4090	8693	8712	-20.21	aTGACGTC-G-ACTGTGAcgga	x|||||||x|x||:||x|xxxx	tACTGCAGACGTGGCAATcatg	--	PREDICTED: basic salivary proline-rich protein 1-like isoform X2 [Bos indicus]	-	-	-	-	GO:0031224//intrinsic component of membrane;GO:0044421//extracellular region part	GO:0043169//cation binding;GO:0060089//molecular transducer activity	GO:0007162//negative regulation of cell adhesion;GO:0007169//transmembrane receptor protein tyrosine kinase signaling pathway;GO:0007606//sensory perception of chemical stimulus;GO:0010596//negative regulation of endothelial cell migration;GO:0045765//regulation of angiogenesis;GO:0048869//cellular developmental process;GO:0050922//negative regulation of chemotaxis	--
miR-509-x	MSTRG.4578	497	521	-22.62	tTGACGTCGTGGGGTCCGAAGGTac	x|||||||x||x:xx|||xx:||xx	tACTGCAG-ACGT--GGCAATCAtg	--	reverse transcriptase-like [Bos taurus]	-	-	-	-	GO:0043231//intracellular membrane-bounded organelle	GO:0003723//RNA binding	GO:0006464//cellular protein modification process;GO:0015980//energy derivation by oxidation of organic compounds	--
miR-509-x	MSTRG.5364	83	103	-19.22	gTGACGTCGG-GTCTTGAGgac	x|||||||x|x::|x|x||xxx	tACTGCAGACGTGGCAATCatg	--	type I cytoskeletal 19-like protein [Labeo rohita]	Metabolism;Metabolism	Global and overview maps;Carbohydrate metabolism	ko01100//Metabolic pathways;ko00650//Butanoate metabolism	K00109;K00109	-	-	-	--
miR-509-x	MSTRG.6886	40	60	-18.23	aTGACGTCGACTAC-TCAGTga	x|||||||xx|xx|x|x|||xx	tACTGCAGACGTGGCAATCAtg	ABCC4	TPA: ATP-binding cassette protein C4-like [Bos taurus]	Environmental Information Processing;Organismal Systems;Environmental Information Processing;Human Diseases	Signal transduction;Digestive system;Membrane transport;Drug resistance: antineoplastic	ko04024//cAMP signaling pathway;ko04976//Bile secretion;ko02010//ABC transporters;ko01523//Antifolate resistance	K05673;K05673;K05673;K05673	GO:0030667//secretory granule membrane;GO:0031224//intrinsic component of membrane	GO:0005253//anion channel activity;GO:0016616//oxidoreductase activity, acting on the CH-OH group of donors, NAD or NADP as acceptor;GO:0032550//purine ribonucleoside binding;GO:0042626//ATPase activity, coupled to transmembrane movement of substances	GO:0001775//cell activation;GO:0006821//chloride transport;GO:0007599//hemostasis;GO:0008284//positive regulation of cell proliferation;GO:0009719//response to endogenous stimulus;GO:0010033//response to organic substance;GO:0044710//single-organism metabolic process	--
miR-509-x	MSTRG.7424	454	476	-22.1	cTGACGTCCCCCACCGTGAaggc	x|||||||xx|x|||||x|xxxx	tACTGCAGACG-TGGCAATcatg	--	PREDICTED: gametogenetin-like [Capra hircus]	-	-	-	-	-	-	-	--
miR-509-x	MSTRG.7775	221	242	-17.63	aTGACGTCCATAGTGTAAGaag	x|||||||xx:|x:||x||xxx	tACTGCAGACGTGGCAATCatg	--	ankyrin repeat domain 50 [Homo sapiens]	-	-	-	-	GO:0043231//intracellular membrane-bounded organelle	-	GO:0008104//protein localization;GO:0016192//vesicle-mediated transport	--
miR-971-x	MSTRG.13424	899	916	-12.94	cAGATTCAGTGGTAatat	x|||||||||xx||xxxx	cTCTAAGTCAGAATcccg	COBLL1	cordon-bleu protein-like 1 [Bos indicus x Bos taurus]	-	-	-	-	GO:0031988//membrane-bounded vesicle	-	-	--
miR-971-x	MSTRG.15630	773	790	-12.34	gAGATTCACTTgaaccct	x|||||||x|:xxxxxxx	cTCTAAGTCAGaatcccg	--	protein N-lysine methyltransferase METTL21A isoform X3 [Ovis aries]	-	-	-	-	GO:0031224//intrinsic component of membrane;GO:0044421//extracellular region part	GO:0043169//cation binding;GO:0060089//molecular transducer activity	GO:0007162//negative regulation of cell adhesion;GO:0007169//transmembrane receptor protein tyrosine kinase signaling pathway;GO:0007606//sensory perception of chemical stimulus;GO:0010596//negative regulation of endothelial cell migration;GO:0045765//regulation of angiogenesis;GO:0048869//cellular developmental process;GO:0050922//negative regulation of chemotaxis	--
miR-971-x	MSTRG.29222	7199	7216	-16.61	cAGATTCAGTaggcattt	x|||||||||xxxxxxxx	cTCTAAGTCAgaatcccg	--	serine/arginine repetitive matrix protein 1-like [Zalophus californianus]	-	-	-	-	GO:0042579//microbody	GO:0005515//protein binding;GO:0016647//oxidoreductase activity, acting on the CH-NH group of donors, oxygen as acceptor	GO:0006596//polyamine biosynthetic process;GO:0006598//polyamine catabolic process;GO:0031328//positive regulation of cellular biosynthetic process;GO:0044710//single-organism metabolic process;GO:0051234//establishment of localization	--
miR-504-y	MSTRG.15669	21	40	-24.21	aCCCTCGC---TCGTCCGACAcc	x|||||||xxx:|||||x|x|xx	aGGGAGCGCAGGGCAGGGTTTct	--	-	-	-	-	-	-	-	-	--
miR-504-y	MSTRG.1998	376	397	-28.62	cCCCTCGCC-CCCGGGCCGGtgt	x|||||||xx||||xx||::xxx	aGGGAGCGCAGGGCAGGGTTtct	DACT2	dapper homolog 2 [Bos indicus x Bos taurus]	-	-	-	-	GO:0043231//intracellular membrane-bounded organelle	GO:0019901//protein kinase binding	GO:0000904//cell morphogenesis involved in differentiation;GO:0007155//cell adhesion;GO:0032926//negative regulation of activin receptor signaling pathway;GO:0072044//collecting duct development	--
miR-504-y	MSTRG.32506	349	372	-26.83	aCCCTCGCCCTCTGGACTCGGGag	x|||||||xx||:x|x|:|:::xx	aGGGAGCGC-AGGGCAGGGTTTct	--	probable inactive serine/threonine-protein kinase slob2 isoform X1 [Vicugna pacos]	-	-	-	-	-	-	-	--
miR-504-y	MSTRG.4090	5304	5325	-29.58	cCCCTCGC-TCCCACCCCccgac	x|||||||x||||xx|||xxxxx	aGGGAGCGCAGGGCAGGGtttct	--	PREDICTED: basic salivary proline-rich protein 1-like isoform X2 [Bos indicus]	-	-	-	-	GO:0031224//intrinsic component of membrane;GO:0044421//extracellular region part	GO:0043169//cation binding;GO:0060089//molecular transducer activity	GO:0007162//negative regulation of cell adhesion;GO:0007169//transmembrane receptor protein tyrosine kinase signaling pathway;GO:0007606//sensory perception of chemical stimulus;GO:0010596//negative regulation of endothelial cell migration;GO:0045765//regulation of angiogenesis;GO:0048869//cellular developmental process;GO:0050922//negative regulation of chemotaxis	--
miR-504-y	MSTRG.6690	184	207	-33.96	gCCCTCGCGCCCGCCTCCGGGAcc	x||||||||x||x|x|||x::|xx	aGGGAGCGCAGG-GCAGGGTTTct	--	uncharacterized protein LOC113906999 [Bos indicus x Bos taurus]	-	-	-	-	-	-	-	--
miR-504-y	MSTRG.7424	1471	1493	-29.82	cCCCTCGCGCCGCGGGCCccctc	x||||||||x|x||xx||xxxxx	aGGGAGCGCAGGGCAGGGtttct	--	PREDICTED: gametogenetin-like [Capra hircus]	-	-	-	-	-	-	-	--
miR-504-y	MSTRG.9421	1100	1122	-28.51	tCCCTCGCCCCTCGgacgcccgc	x|||||||xx|:||xxxxxxxxx	aGGGAGCGCAGGGCagggtttct	--	thymocyte nuclear protein 1 isoform X2 [Odocoileus virginianus texanus]	-	-	-	-	-	-	-	--
miR-506-y	MSTRG.31464	487	508	-15.98	aATTCCGTcatctccgactctc	x|||||||xxxxxxxxxxxxxx	gTAAGGCAcccttctgagtaga	--	protein N-lysine methyltransferase METTL21A isoform X3 [Ovis aries]	Organismal Systems	Sensory system	ko04742//Taste transduction	K08474	GO:0005576//extracellular region;GO:0031224//intrinsic component of membrane;GO:0044424//intracellular part	GO:0005488//binding;GO:0060089//molecular transducer activity	GO:0001525//angiogenesis;GO:0007166//cell surface receptor signaling pathway;GO:0007606//sensory perception of chemical stimulus;GO:0040013//negative regulation of locomotion;GO:0048523//negative regulation of cellular process;GO:0051241//negative regulation of multicellular organismal process	--
miR-506-y	MSTRG.31466	897	920	-20.6	gATTCCGTACAAAAGACTTCGTcc	x|||||||xxx||x||||x|:|xx	gTAAGGCACCCTT-CTGA-GTAga	LONRF2	LOW QUALITY PROTEIN: LON peptidase N-terminal domain and RING finger protein 2 [Bos taurus]	-	-	-	-	-	GO:0046914//transition metal ion binding	GO:0019538//protein metabolic process	--
miR-506-y	MSTRG.6877	146	165	-11.8	gATTCCGT---AAGGTGTCAagg	x|||||||xxx|||::x|||xxx	gTAAGGCACCCTTCTG-AGTaga	ABCC4	multidrug resistance-associated protein 4-like isoform X6 [Bos taurus]	Environmental Information Processing;Organismal Systems;Environmental Information Processing;Human Diseases	Signal transduction;Digestive system;Membrane transport;Drug resistance: antineoplastic	ko04024//cAMP signaling pathway;ko04976//Bile secretion;ko02010//ABC transporters;ko01523//Antifolate resistance	K05673;K05673;K05673;K05673	GO:0030667//secretory granule membrane;GO:0031224//intrinsic component of membrane	GO:0005253//anion channel activity;GO:0016616//oxidoreductase activity, acting on the CH-OH group of donors, NAD or NADP as acceptor;GO:0032550//purine ribonucleoside binding;GO:0042626//ATPase activity, coupled to transmembrane movement of substances	GO:0001775//cell activation;GO:0006821//chloride transport;GO:0007599//hemostasis;GO:0008284//positive regulation of cell proliferation;GO:0009719//response to endogenous stimulus;GO:0010033//response to organic substance;GO:0044710//single-organism metabolic process	--
miR-6525-z	MSTRG.10777	1272	1291	-32.44	gACCCCTTT-GTCTTCGTccg	x||||||||x|||:||::xxx	cTGGGGAAAGCAGGAGTGagg	--	GRAM domain-containing protein 2B isoform X2 [Bos taurus]	Cellular Processes	Transport and catabolism	ko04146//Peroxisome	K00308	GO:0005737//cytoplasm;GO:0043231//intracellular membrane-bounded organelle	GO:0005515//protein binding;GO:0016647//oxidoreductase activity, acting on the CH-NH group of donors, oxygen as acceptor	GO:0006596//polyamine biosynthetic process;GO:0006598//polyamine catabolic process;GO:0009653//anatomical structure morphogenesis;GO:0016043//cellular component organization;GO:0031325//positive regulation of cellular metabolic process;GO:0031326//regulation of cellular biosynthetic process;GO:0044763//single-organism cellular process;GO:0048523//negative regulation of cellular process;GO:0048731…	--
miR-6525-z	MSTRG.15080	144	164	-17.78	gACCCCTTcacagagaccaga	x|||||||xxxxxxxxxxxxx	cTGGGGAAagcaggagtgagg	--	PREDICTED: immunoglobulin superfamily member 23 [Bos mutus]	-	-	-	-	-	-	-	--
miR-6525-z	MSTRG.17500	1603	1625	-29.48	aACCCCTTCGGAGTCCTCCCTcc	x|||||||xx|xx|||||x||xx	cTGGGGAAAGC--AGGAGTGAgg	C4B	complement C4 isoform X1 [Bos taurus]	Human Diseases;Human Diseases;Organismal Systems;Human Diseases	Immune disease;Infectious disease: bacterial;Immune system;Infectious disease: bacterial	ko05322//Systemic lupus erythematosus;ko05150//Staphylococcus aureus infection;ko04610//Complement and coagulation cascades;ko05133//Pertussis	K03989;K03989;K03989;K03989	GO:0016020//membrane;GO:0031988//membrane-bounded vesicle;GO:0044217//other organism part	GO:0001846//opsonin binding;GO:0061135//endopeptidase regulator activity	GO:0002237//response to molecule of bacterial origin;GO:0002673//regulation of acute inflammatory response;GO:0006956//complement activation;GO:0010466//negative regulation of peptidase activity;GO:0019724//B cell mediated immunity;GO:0043277//apoptotic cell clearance	--
miR-6525-z	MSTRG.21507	1390	1411	-24.78	gACCCCTTCTCTTACCCGTcag	x|||||||x||x|x|x|::xxx	cTGGGGAA-AGCAGGAGTGagg	Slc29a2	equilibrative nucleoside transporter 2 isoform X2 [Bos taurus]	Human Diseases	Substance dependence	ko05034//Alcoholism	K15014	GO:0016021//integral component of membrane;GO:0031090//organelle membrane;GO:0043231//intracellular membrane-bounded organelle;GO:0043232//intracellular non-membrane-bounded organelle	GO:0015932//nucleobase-containing compound transmembrane transporter activity	GO:0006725//cellular aromatic compound metabolic process;GO:0006863//purine nucleobase transport;GO:0007589//body fluid secretion;GO:0015855//pyrimidine nucleobase transport;GO:0015864//pyrimidine nucleoside transport;GO:0032868//response to insulin;GO:0044763//single-organism cellular process	--
miR-6525-z	MSTRG.28465	574	595	-23.7	aACCCCTTTACTTCCTCAaact	x||||||||x|x||||||xxxx	cTGGGGAAA-GCAGGAGTgagg	--	Barrier-to-autointegration factor [Varanus komodoensis]	Human Diseases	Infectious disease: viral	ko05168//Herpes simplex virus 1 infection	K09228	GO:0031224//intrinsic component of membrane;GO:0042579//microbody	GO:0005515//protein binding;GO:0016647//oxidoreductase activity, acting on the CH-NH group of donors, oxygen as acceptor;GO:0043168//anion binding	GO:0006596//polyamine biosynthetic process;GO:0006598//polyamine catabolic process;GO:0031328//positive regulation of cellular biosynthetic process;GO:0044710//single-organism metabolic process	--
miR-6525-z	MSTRG.9567	962	982	-16.8	gACCCCTTggcagaggaggcg	x|||||||xxxxxxxxxxxxx	cTGGGGAAagcaggagtgagg	AHNAK2	protein AHNAK2 isoform X1 [Bos indicus x Bos taurus]	Human Diseases	Infectious disease: bacterial	ko05132//Salmonella infection	K23934	GO:0012506//vesicle membrane;GO:0031674//I band;GO:0044459//plasma membrane part	-	GO:0007009//plasma membrane organization	--
miR-279-y	MSTRG.29222	6764	6785	-13.1	tCTGATCTT-ATCTTATGTAGtg	x|||||||xx||x|x|x|||:xx	tGACTAGATCTACACT-CATTga	--	serine/arginine repetitive matrix protein 1-like [Zalophus californianus]	-	-	-	-	GO:0042579//microbody	GO:0005515//protein binding;GO:0016647//oxidoreductase activity, acting on the CH-NH group of donors, oxygen as acceptor	GO:0006596//polyamine biosynthetic process;GO:0006598//polyamine catabolic process;GO:0031328//positive regulation of cellular biosynthetic process;GO:0044710//single-organism metabolic process;GO:0051234//establishment of localization	--
miR-279-y	MSTRG.4090	3965	3986	-13.02	aCTGATCTAacacccggaaata	x||||||||xxxxxxxxxxxxx	tGACTAGATctacactcattga	--	PREDICTED: basic salivary proline-rich protein 1-like isoform X2 [Bos indicus]	-	-	-	-	GO:0031224//intrinsic component of membrane;GO:0044421//extracellular region part	GO:0043169//cation binding;GO:0060089//molecular transducer activity	GO:0007162//negative regulation of cell adhesion;GO:0007169//transmembrane receptor protein tyrosine kinase signaling pathway;GO:0007606//sensory perception of chemical stimulus;GO:0010596//negative regulation of endothelial cell migration;GO:0045765//regulation of angiogenesis;GO:0048869//cellular developmental process;GO:0050922//negative regulation of chemotaxis	--
miR-279-y	MSTRG.4578	1488	1509	-16.51	aCTGATCTGTCTGGAAACAAcc	x|||||||:xx||xx|xx||xx	tGACTAGATCTACACTCATTga	--	reverse transcriptase-like [Bos taurus]	-	-	-	-	GO:0043231//intracellular membrane-bounded organelle	GO:0003723//RNA binding	GO:0006464//cellular protein modification process;GO:0015980//energy derivation by oxidation of organic compounds	--
miR-872-y	MSTRG.3753	296	316	-14.89	aCTTGATA-CTTC-TCGTGAcac	x|||||||x|x||x|||x||xxx	tGAACTATTGCAGTAGC-CTcct	WAC	WW domain-containing adapter protein with coiled-coil isoform X2 [Bos taurus]	-	-	-	-	GO:0016604//nuclear body;GO:0030529//intracellular ribonucleoprotein complex	GO:0001099//basal RNA polymerase II transcription machinery binding	GO:0000077//DNA damage checkpoint;GO:0006355//regulation of transcription, DNA-templated;GO:0006513//protein monoubiquitination;GO:0010508//positive regulation of autophagy;GO:0031330//negative regulation of cellular catabolic process;GO:0033523//histone H2B ubiquitination	--
miR-872-y	MSTRG.4478	2134	2155	-14.05	aCTTGATACCTGTC-TCCAAGca	x|||||||x|x|||x||xx||xx	tGAACTATTG-CAGTAGCCTCct	F52C9.6	endonuclease-reverse transcriptase [Babesia ovata]	-	-	-	-	-	-	-	--
miR-872-y	MSTRG.7126	424	445	-15.93	aCTTGATAGTCTCATTtaccgt	x|||||||::x||||:xxxxxx	tGAACTATTGCAGTAGcctcct	Mycbp2	PREDICTED: E3 ubiquitin-protein ligase MYCBP2 isoform X1 [Equus przewalskii]	Organismal Systems	Development and regeneration	ko04361//Axon regeneration	K10693	GO:0005856//cytoskeleton;GO:0043005//neuron projection;GO:0043231//intracellular membrane-bounded organelle	GO:0003824//catalytic activity;GO:0046914//transition metal ion binding;GO:0046983//protein dimerization activity	GO:0008045//motor neuron axon guidance;GO:0008104//protein localization;GO:0009895//negative regulation of catabolic process;GO:0010468//regulation of gene expression;GO:0021955//central nervous system neuron axonogenesis;GO:0032446//protein modification by small protein conjugation;GO:0033043//regulation of organelle organization;GO:0034645//cellular macromolecule biosynthetic process	--
miR-11998-z	MSTRG.1430	613	631	-13.65	aAGAGATC---CAAGACTGTga	x|||||||xxx|||:|xx||xx	tTCTCTAGTGTGTTTTCCCAac	FBXO30	PREDICTED: F-box only protein 30 [Bison bison bison]	-	-	-	-	-	GO:0004721//phosphoprotein phosphatase activity;GO:0019787//ubiquitin-like protein transferase activity;GO:0030247//polysaccharide binding;GO:0046914//transition metal ion binding	GO:0006470//protein dephosphorylation;GO:0032446//protein modification by small protein conjugation	--
miR-11998-z	MSTRG.15080	842	862	-20.25	aAGAGATCAT-CAAGTGGtact	x||||||||:x|||:x||xxxx	tTCTCTAGTGTGTTTTCCcaac	--	PREDICTED: immunoglobulin superfamily member 23 [Bos mutus]	-	-	-	-	-	-	-	--
miR-11998-z	MSTRG.4478	5440	5461	-17.27	aAGAGATCcggtcttatgacct	x|||||||xxxxxxxxxxxxxx	tTCTCTAGtgtgttttcccaac	F52C9.6	endonuclease-reverse transcriptase [Babesia ovata]	-	-	-	-	-	-	-	--
miR-2188-x	MSTRG.15630	719	740	-11.55	cTCCAGGTgctgccaccgtcta	x|||||||xxxxxxxxxxxxxx	aAGGTCCAacctcacatgtcct	--	protein N-lysine methyltransferase METTL21A isoform X3 [Ovis aries]	-	-	-	-	GO:0031224//intrinsic component of membrane;GO:0044421//extracellular region part	GO:0043169//cation binding;GO:0060089//molecular transducer activity	GO:0007162//negative regulation of cell adhesion;GO:0007169//transmembrane receptor protein tyrosine kinase signaling pathway;GO:0007606//sensory perception of chemical stimulus;GO:0010596//negative regulation of endothelial cell migration;GO:0045765//regulation of angiogenesis;GO:0048869//cellular developmental process;GO:0050922//negative regulation of chemotaxis	--
miR-2188-x	MSTRG.31464	571	592	-13.85	gTCCAGGTTCCAGTccctgtct	x||||||||xx|||xxxxxxxx	aAGGTCCAACCTCAcatgtcct	--	protein N-lysine methyltransferase METTL21A isoform X3 [Ovis aries]	Organismal Systems	Sensory system	ko04742//Taste transduction	K08474	GO:0005576//extracellular region;GO:0031224//intrinsic component of membrane;GO:0044424//intracellular part	GO:0005488//binding;GO:0060089//molecular transducer activity	GO:0001525//angiogenesis;GO:0007166//cell surface receptor signaling pathway;GO:0007606//sensory perception of chemical stimulus;GO:0040013//negative regulation of locomotion;GO:0048523//negative regulation of cellular process;GO:0051241//negative regulation of multicellular organismal process	--
miR-2188-x	MSTRG.31466	611	632	-11.16	gTCCAGGTcccgaaccactgtg	x|||||||xxxxxxxxxxxxxx	aAGGTCCAacctcacatgtcct	LONRF2	LOW QUALITY PROTEIN: LON peptidase N-terminal domain and RING finger protein 2 [Bos taurus]	-	-	-	-	-	GO:0046914//transition metal ion binding	GO:0019538//protein metabolic process	--
miR-2188-x	MSTRG.4090	18165	18186	-17.81	cTCCAGGTCGtcctcagggctc	x|||||||x|xxxxxxxxxxxx	aAGGTCCAACctcacatgtcct	--	PREDICTED: basic salivary proline-rich protein 1-like isoform X2 [Bos indicus]	-	-	-	-	GO:0031224//intrinsic component of membrane;GO:0044421//extracellular region part	GO:0043169//cation binding;GO:0060089//molecular transducer activity	GO:0007162//negative regulation of cell adhesion;GO:0007169//transmembrane receptor protein tyrosine kinase signaling pathway;GO:0007606//sensory perception of chemical stimulus;GO:0010596//negative regulation of endothelial cell migration;GO:0045765//regulation of angiogenesis;GO:0048869//cellular developmental process;GO:0050922//negative regulation of chemotaxis	--
miR-2188-x	MSTRG.6530	42	63	-18.17	gTCCAGGTCAAAGAGGGAAGgt	x|||||||xxx||x|x:x||xx	aAGGTCCAACCTCACATGTCct	--	-	-	-	-	-	-	-	-	--
miR-11-y	MSTRG.22496	1397	1419	-20.39	gTAGTGTCAAGTTTTcgtagtta	x||||||||x||:|:xxxxxxxx	cATCACAGT-CAGAGttctagct	--	endonuclease-reverse transcriptase [Babesia ovata]	-	-	-	-	GO:0031252//cell leading edge;GO:0070161//anchoring junction	GO:0003779//actin binding;GO:0050839//cell adhesion molecule binding	GO:0010468//regulation of gene expression;GO:0098602//single organism cell adhesion	--
miR-11-y	MSTRG.29222	2778	2796	-14.91	cTAGTGTC---TTAAGGGTCcc	x|||||||xxx:|x|:|:||xx	cATCACAGTCAGAGTTCTAGct	--	serine/arginine repetitive matrix protein 1-like [Zalophus californianus]	-	-	-	-	GO:0042579//microbody	GO:0005515//protein binding;GO:0016647//oxidoreductase activity, acting on the CH-NH group of donors, oxygen as acceptor	GO:0006596//polyamine biosynthetic process;GO:0006598//polyamine catabolic process;GO:0031328//positive regulation of cellular biosynthetic process;GO:0044710//single-organism metabolic process;GO:0051234//establishment of localization	--
miR-11-y	MSTRG.31464	434	454	-19.95	tTAGTGTC-GTTTCAtcggttg	x|||||||x||:|||xxxxxxx	cATCACAGTCAGAGTtctagct	--	protein N-lysine methyltransferase METTL21A isoform X3 [Ovis aries]	Organismal Systems	Sensory system	ko04742//Taste transduction	K08474	GO:0005576//extracellular region;GO:0031224//intrinsic component of membrane;GO:0044424//intracellular part	GO:0005488//binding;GO:0060089//molecular transducer activity	GO:0001525//angiogenesis;GO:0007166//cell surface receptor signaling pathway;GO:0007606//sensory perception of chemical stimulus;GO:0040013//negative regulation of locomotion;GO:0048523//negative regulation of cellular process;GO:0051241//negative regulation of multicellular organismal process	--
miR-11-y	MSTRG.4090	4752	4773	-27.25	gTAGTGTCGGAATCGACGTCgg	x|||||||:|xx||:|x:||xx	cATCACAGTCAGAGTTCTAGct	--	PREDICTED: basic salivary proline-rich protein 1-like isoform X2 [Bos indicus]	-	-	-	-	GO:0031224//intrinsic component of membrane;GO:0044421//extracellular region part	GO:0043169//cation binding;GO:0060089//molecular transducer activity	GO:0007162//negative regulation of cell adhesion;GO:0007169//transmembrane receptor protein tyrosine kinase signaling pathway;GO:0007606//sensory perception of chemical stimulus;GO:0010596//negative regulation of endothelial cell migration;GO:0045765//regulation of angiogenesis;GO:0048869//cellular developmental process;GO:0050922//negative regulation of chemotaxis	--
miR-11-y	MSTRG.6881	52	76	-15.88	tTAGTGTCCATATCGTCAGGTTCct	x|||||||x|xx||x|||:|x||xx	cATCACAG-TC-AG-AGTTCTAGct	ABCC4	multidrug resistance-associated protein 4-like [Bos indicus x Bos taurus]	Environmental Information Processing;Organismal Systems;Environmental Information Processing;Human Diseases	Signal transduction;Digestive system;Membrane transport;Drug resistance: antineoplastic	ko04024//cAMP signaling pathway;ko04976//Bile secretion;ko02010//ABC transporters;ko01523//Antifolate resistance	K05673;K05673;K05673;K05673	GO:0030667//secretory granule membrane;GO:0031224//intrinsic component of membrane	GO:0015405//P-P-bond-hydrolysis-driven transmembrane transporter activity;GO:0016616//oxidoreductase activity, acting on the CH-OH group of donors, NAD or NADP as acceptor;GO:0017111//nucleoside-triphosphatase activity;GO:0032550//purine ribonucleoside binding	GO:0001775//cell activation;GO:0007599//hemostasis;GO:0008284//positive regulation of cell proliferation;GO:0009719//response to endogenous stimulus;GO:0010033//response to organic substance;GO:0044710//single-organism metabolic process;GO:0051234//establishment of localization	--
miR-11-y	MSTRG.9421	1183	1202	-15.08	gTAGTGTC--TCCGGTGACCtg	x|||||||xx||xx:x||x|xx	cATCACAGTCAGAGTTCTAGct	--	thymocyte nuclear protein 1 isoform X2 [Odocoileus virginianus texanus]	-	-	-	-	-	-	-	--
miR-1552-y	MSTRG.3691	6	28	-20.16	tCGATCGACGACGAGGaccccgt	x||||||||||x||x|xxxxxxx	cGCTAGCTGCT-CTGCactaact	MRC1	PREDICTED: macrophage mannose receptor 1 [Bos mutus]	Human Diseases;Cellular Processes	Infectious disease: bacterial;Transport and catabolism	ko05152//Tuberculosis;ko04145//Phagosome	K06560;K06560	GO:0016021//integral component of membrane;GO:0031090//organelle membrane;GO:0044464//cell part	GO:0038023//signaling receptor activity;GO:0048029//monosaccharide binding	GO:0006897//endocytosis;GO:0032496//response to lipopolysaccharide;GO:0034341//response to interferon-gamma;GO:0050794//regulation of cellular process;GO:0070670//response to interleukin-4	--
miR-2765-x	MSTRG.29222	6290	6311	-15.66	aCCATTGAccgacgacccttct	x|||||||xxxxxxxxxxxxxx	tGGTAACTccaccaccgttggc	--	serine/arginine repetitive matrix protein 1-like [Zalophus californianus]	-	-	-	-	GO:0042579//microbody	GO:0005515//protein binding;GO:0016647//oxidoreductase activity, acting on the CH-NH group of donors, oxygen as acceptor	GO:0006596//polyamine biosynthetic process;GO:0006598//polyamine catabolic process;GO:0031328//positive regulation of cellular biosynthetic process;GO:0044710//single-organism metabolic process;GO:0051234//establishment of localization	--
miR-2765-x	MSTRG.5784	255	277	-12.91	cCCATTGAAGAGTTCATCAACat	x|||||||x|x|x|xxx||||xx	tGGTAACTCCACCACC-GTTGgc	SETMAR	mariner transposase [Homo sapiens]	Metabolism;Metabolism	Global and overview maps;Amino acid metabolism	ko01100//Metabolic pathways;ko00310//Lysine degradation	K11433;K11433	GO:0005634//nucleus;GO:0030139//endocytic vesicle;GO:0031224//intrinsic component of membrane;GO:0042995//cell projection;GO:0044427//chromosomal part	GO:0004520//endodeoxyribonuclease activity;GO:0018024//histone-lysine N-methyltransferase activity;GO:0019899//enzyme binding;GO:0043566//structure-specific DNA binding;GO:0046983//protein dimerization activity	GO:0006282//regulation of DNA repair;GO:0006303//double-strand break repair via nonhomologous end joining;GO:0006308//DNA catabolic process;GO:0007041//lysosomal transport;GO:0007093//mitotic cell cycle checkpoint;GO:0010452//histone H3-K36 methylation;GO:0010912//positive regulation of isomerase activity;GO:0010948//negative regulation of cell cycle process;GO:0016050//vesicle organization;GO:00…	--
miR-2765-x	MSTRG.7775	230	251	-11.83	tCCATTGACATGACGTCCATag	x|||||||xx||xx|x|x|:xx	tGGTAACTCCACCACCGTTGgc	--	ankyrin repeat domain 50 [Homo sapiens]	-	-	-	-	GO:0043231//intracellular membrane-bounded organelle	-	GO:0008104//protein localization;GO:0016192//vesicle-mediated transport	--
miR-653-z	MSTRG.21230	529	551	-10.69	tCAACTTTTCCTTAGCAACccct	x|||||||xxx||||xx||xxxx	tGTTGAAAC--AATCTCTGttga	NAP1L4	nucleosome assembly protein 1-like 4 isoform X2 [Erpetoichthys calabaricus]	-	-	-	-	GO:0043005//neuron projection;GO:0044297//cell body;GO:0044424//intracellular part	GO:0003723//RNA binding;GO:0005515//protein binding	GO:0034728//nucleosome organization	--
miR-653-z	MSTRG.2728	233	252	-13.39	tCAACTTT-TAGGAGGGGAat	x|||||||x|x:|||:x:|xx	tGTTGAAACAATCTCTGTTga	--	-	-	-	-	-	-	-	-	--
miR-653-z	MSTRG.4478	1323	1346	-20.67	aCAACTTTAGATTTGGAGACAcac	x|||||||x|xx||:||||||xxx	tGTTGAAA-C--AATCTCTGTtga	F52C9.6	endonuclease-reverse transcriptase [Babesia ovata]	-	-	-	-	-	-	-	--
miR-429-y	MSTRG.15630	895	916	-12.1	gTTATGACTCATAAAAGGGGag	x|||||||xx|:x|xx:x||xx	tAATACTGTCTGGTAATGCCgt	--	protein N-lysine methyltransferase METTL21A isoform X3 [Ovis aries]	-	-	-	-	GO:0031224//intrinsic component of membrane;GO:0044421//extracellular region part	GO:0043169//cation binding;GO:0060089//molecular transducer activity	GO:0007162//negative regulation of cell adhesion;GO:0007169//transmembrane receptor protein tyrosine kinase signaling pathway;GO:0007606//sensory perception of chemical stimulus;GO:0010596//negative regulation of endothelial cell migration;GO:0045765//regulation of angiogenesis;GO:0048869//cellular developmental process;GO:0050922//negative regulation of chemotaxis	--
miR-429-y	MSTRG.18801	440	461	-18.23	gTTATGACGGAggacgagtgac	x|||||||:||xxxxxxxxxxx	tAATACTGTCTggtaatgccgt	MKI67	PREDICTED: antigen KI-67 [Bos mutus]	-	-	-	-	GO:0005694//chromosome;GO:0043231//intracellular membrane-bounded organelle	GO:0003723//RNA binding;GO:0005515//protein binding;GO:0036094//small molecule binding	GO:0000280//nuclear division;GO:0009408//response to heat;GO:0010033//response to organic substance;GO:0031099//regeneration;GO:0044260//cellular macromolecule metabolic process;GO:0044763//single-organism cellular process;GO:1903510//mucopolysaccharide metabolic process	--
miR-429-y	MSTRG.29222	8159	8180	-16.79	cTTATGACCTAACCCAACGGtt	x|||||||xx|x|xxx||||xx	tAATACTGTCTGGTAATGCCgt	--	serine/arginine repetitive matrix protein 1-like [Zalophus californianus]	-	-	-	-	GO:0042579//microbody	GO:0005515//protein binding;GO:0016647//oxidoreductase activity, acting on the CH-NH group of donors, oxygen as acceptor	GO:0006596//polyamine biosynthetic process;GO:0006598//polyamine catabolic process;GO:0031328//positive regulation of cellular biosynthetic process;GO:0044710//single-organism metabolic process;GO:0051234//establishment of localization	--
miR-429-y	MSTRG.4578	666	687	-15.12	cTTATGACCTCGAACA--GCGGta	x|||||||xxx||x||xx:|||xx	tAATACTGT--CTGGTAATGCCgt	--	reverse transcriptase-like [Bos taurus]	-	-	-	-	GO:0043231//intracellular membrane-bounded organelle	GO:0003723//RNA binding	GO:0006464//cellular protein modification process;GO:0015980//energy derivation by oxidation of organic compounds	--
miR-456-y	MSTRG.14602	176	196	-23.01	gTCCGACCG-TTTGCgctccgc	x|||||||:x|:|:|xxxxxxx	cAGGCTGGTTAGATGgttgtct	ZNF671	zinc finger protein 28 homolog [Zalophus californianus]	Human Diseases	Infectious disease: viral	ko05168//Herpes simplex virus 1 infection	K09228	-	-	-	--
miR-456-y	MSTRG.15104	368	388	-16.35	cTCCGACCG-TCTcgtcgttct	x|||||||:x|||xxxxxxxxx	cAGGCTGGTTAGAtggttgtct	--	PREDICTED: phospholipase A2 inhibitor and Ly6/PLAUR domain-containing protein [Bison bison bison]	-	-	-	-	-	-	-	--
miR-456-y	MSTRG.1998	1305	1326	-19.47	cTCCGACCCAGTC-AGGAGCcgg	x|||||||x|:||x|xx|:|xxx	cAGGCTGG-TTAGATGGTTGtct	DACT2	dapper homolog 2 [Bos indicus x Bos taurus]	-	-	-	-	GO:0043231//intracellular membrane-bounded organelle	GO:0019901//protein kinase binding	GO:0000904//cell morphogenesis involved in differentiation;GO:0007155//cell adhesion;GO:0032926//negative regulation of activin receptor signaling pathway;GO:0072044//collecting duct development	--
miR-456-y	MSTRG.21179	702	719	-18.13	cTCCGACC----TGCCAGggcg	x|||||||xxxx|:|||:xxxx	cAGGCTGGTTAGATGGTTgtct	--	LOW QUALITY PROTEIN: collagen alpha-1(IV) chain-like [Phocoena sinus]	-	-	-	-	-	-	-	--
miR-456-y	MSTRG.29222	4996	5017	-18.35	gTCCGACCTGTgggggtcggta	x|||||||x:|xxxxxxxxxxx	cAGGCTGGTTAgatggttgtct	--	serine/arginine repetitive matrix protein 1-like [Zalophus californianus]	-	-	-	-	GO:0042579//microbody	GO:0005515//protein binding;GO:0016647//oxidoreductase activity, acting on the CH-NH group of donors, oxygen as acceptor	GO:0006596//polyamine biosynthetic process;GO:0006598//polyamine catabolic process;GO:0031328//positive regulation of cellular biosynthetic process;GO:0044710//single-organism metabolic process;GO:0051234//establishment of localization	--
miR-456-y	MSTRG.29423	452	473	-18.25	cTCCGACCCCTTCCCCGGacct	x|||||||xx|:xx||::xxxx	cAGGCTGGTTAGATGGTTgtct	FBN3	fibrillin-3 [Bos taurus]	-	-	-	-	-	-	GO:0007507//heart development;GO:0009887//organ morphogenesis;GO:0009987//cellular process	--
miR-456-y	MSTRG.31464	549	572	-15.88	cTCCGACCCGAAACGACCtcatct	x|||||||xx||x|x|||xxxxxx	cAGGCTGG--TTAGATGGttgtct	--	protein N-lysine methyltransferase METTL21A isoform X3 [Ovis aries]	Organismal Systems	Sensory system	ko04742//Taste transduction	K08474	GO:0005576//extracellular region;GO:0031224//intrinsic component of membrane;GO:0044424//intracellular part	GO:0005488//binding;GO:0060089//molecular transducer activity	GO:0001525//angiogenesis;GO:0007166//cell surface receptor signaling pathway;GO:0007606//sensory perception of chemical stimulus;GO:0040013//negative regulation of locomotion;GO:0048523//negative regulation of cellular process;GO:0051241//negative regulation of multicellular organismal process	--
miR-456-y	MSTRG.32506	498	516	-17.88	cTCCGACC---CTGTCGAggca	x|||||||xxx||::|:|xxxx	cAGGCTGGTTAGATGGTTgtct	--	probable inactive serine/threonine-protein kinase slob2 isoform X1 [Vicugna pacos]	-	-	-	-	-	-	-	--
miR-456-y	MSTRG.4090	16247	16270	-18.79	cTCCGACCACCATCTGTgggtcac	x||||||||xx||||::xxxxxxx	cAGGCTGGT--TAGATGgttgtct	--	PREDICTED: basic salivary proline-rich protein 1-like isoform X2 [Bos indicus]	-	-	-	-	GO:0031224//intrinsic component of membrane;GO:0044421//extracellular region part	GO:0043169//cation binding;GO:0060089//molecular transducer activity	GO:0007162//negative regulation of cell adhesion;GO:0007169//transmembrane receptor protein tyrosine kinase signaling pathway;GO:0007606//sensory perception of chemical stimulus;GO:0010596//negative regulation of endothelial cell migration;GO:0045765//regulation of angiogenesis;GO:0048869//cellular developmental process;GO:0050922//negative regulation of chemotaxis	--
miR-456-y	MSTRG.4101	1066	1087	-22.5	gTCCGACCTTTTCTTGAAGAct	x|||||||xx|:xx:x||x|xx	cAGGCTGGTTAGATGGTTGTct	--	-	-	-	-	-	-	-	-	--
miR-456-y	MSTRG.5364	263	286	-28.22	gTCCGACCTCATGTCACCGATAag	x|||||||xx||x|x|||:|:|xx	cAGGCTGGT-TAGA-TGGTTGTct	--	type I cytoskeletal 19-like protein [Labeo rohita]	Metabolism;Metabolism	Global and overview maps;Carbohydrate metabolism	ko01100//Metabolic pathways;ko00650//Butanoate metabolism	K00109;K00109	-	-	-	--
miR-456-y	MSTRG.6530	351	373	-26.16	gTCCGACCCCGTACT-CCAACAcg	x|||||||xx:|x||x||||||xx	cAGGCTGGT-TA-GATGGTTGTct	--	-	-	-	-	-	-	-	-	--
miR-456-y	MSTRG.7424	91	112	-27.92	gTCCGACCC-TGTATCCGACGgc	x|||||||xx|x||x||:||:xx	cAGGCTGGTTAGAT-GGTTGTct	--	PREDICTED: gametogenetin-like [Capra hircus]	-	-	-	-	-	-	-	--
miR-456-y	MSTRG.9831	738	759	-23.51	tTCCGACCGGTCGACggggctc	x|||||||::||x||xxxxxxx	cAGGCTGGTTAGATGgttgtct	Arc	PREDICTED: LOW QUALITY PROTEIN: activity-regulated cytoskeleton-associated protein [Bos mutus]	Human Diseases	Substance dependence	ko05031//Amphetamine addiction	K15867	GO:0005856//cytoskeleton;GO:0030141//secretory granule;GO:0044309//neuron spine;GO:0097060//synaptic membrane	GO:0005488//binding	GO:0003002//regionalization;GO:0006996//organelle organization;GO:0007611//learning or memory;GO:0009888//tissue development;GO:0016192//vesicle-mediated transport;GO:0022603//regulation of anatomical structure morphogenesis;GO:0032414//positive regulation of ion transmembrane transporter activity;GO:0048167//regulation of synaptic plasticity;GO:0048870//cell motility	--
miR-3085-y	MSTRG.14602	1025	1046	-15.11	cGACCGACCCTTCAAGAGcggt	x|||||||xx|x|xx|x|xxxx	tCTGGCTGCTATGGCCCCctct	ZNF671	zinc finger protein 28 homolog [Zalophus californianus]	Human Diseases	Infectious disease: viral	ko05168//Herpes simplex virus 1 infection	K09228	-	-	-	--
miR-3085-y	MSTRG.15104	61	82	-15.87	gGACCGACccatcatcctcagt	x|||||||xxxxxxxxxxxxxx	tCTGGCTGctatggccccctct	--	PREDICTED: phospholipase A2 inhibitor and Ly6/PLAUR domain-containing protein [Bison bison bison]	-	-	-	-	-	-	-	--
miR-3085-y	MSTRG.29222	678	699	-18.32	tGACCGACTGTACAGttcttga	x|||||||x:|||x|xxxxxxx	tCTGGCTGCTATGGCcccctct	--	serine/arginine repetitive matrix protein 1-like [Zalophus californianus]	-	-	-	-	GO:0042579//microbody	GO:0005515//protein binding;GO:0016647//oxidoreductase activity, acting on the CH-NH group of donors, oxygen as acceptor	GO:0006596//polyamine biosynthetic process;GO:0006598//polyamine catabolic process;GO:0031328//positive regulation of cellular biosynthetic process;GO:0044710//single-organism metabolic process;GO:0051234//establishment of localization	--
miR-3085-y	MSTRG.31466	975	999	-22.25	gGACCGACAAGTATACCGAGacttt	x|||||||xx|x||||||x|xxxxx	tCTGGCTG--C-TATGGCCCcctct	LONRF2	LOW QUALITY PROTEIN: LON peptidase N-terminal domain and RING finger protein 2 [Bos taurus]	-	-	-	-	-	GO:0046914//transition metal ion binding	GO:0019538//protein metabolic process	--
miR-3085-y	MSTRG.33557	1121	1141	-16.29	aGACCGAC-ACATTTGctcttc	x|||||||x|x|::x|xxxxxx	tCTGGCTGCTATGGCCccctct	ARHGAP6	rho GTPase-activating protein 6 isoform X2 [Bos indicus x Bos taurus]	-	-	-	-	GO:0015629//actin cytoskeleton;GO:0044444//cytoplasmic part	GO:0019899//enzyme binding;GO:0019904//protein domain specific binding;GO:0030674//protein binding, bridging;GO:0060229//lipase activator activity	GO:0001953//negative regulation of cell-matrix adhesion;GO:0007045//cell-substrate adherens junction assembly;GO:0008154//actin polymerization or depolymerization;GO:0010863//positive regulation of phospholipase C activity;GO:0032232//negative regulation of actin filament bundle assembly;GO:0043087//regulation of GTPase activity	--
miR-3085-y	MSTRG.3720	3	26	-20.76	cGACCGACTCTGTACCGtaagtaa	x|||||||xxx:|||||xxxxxxx	tCTGGCTGC--TATGGCcccctct	--	zinc finger protein 438 isoform X1 [Odocoileus virginianus texanus]	-	-	-	-	GO:0043231//intracellular membrane-bounded organelle	GO:0001071//nucleic acid binding transcription factor activity;GO:0043169//cation binding	GO:0006355//regulation of transcription, DNA-templated	--
miR-3085-y	MSTRG.4090	35	55	-24.1	cGACCGACGCT-CCGGAGaccc	x||||||||x|x||||x|xxxx	tCTGGCTGCTATGGCCCCctct	--	PREDICTED: basic salivary proline-rich protein 1-like isoform X2 [Bos indicus]	-	-	-	-	GO:0031224//intrinsic component of membrane;GO:0044421//extracellular region part	GO:0043169//cation binding;GO:0060089//molecular transducer activity	GO:0007162//negative regulation of cell adhesion;GO:0007169//transmembrane receptor protein tyrosine kinase signaling pathway;GO:0007606//sensory perception of chemical stimulus;GO:0010596//negative regulation of endothelial cell migration;GO:0045765//regulation of angiogenesis;GO:0048869//cellular developmental process;GO:0050922//negative regulation of chemotaxis	--
miR-3085-y	MSTRG.6690	978	999	-20.88	cGACCGACAGTACCtcagcccc	x|||||||x:||||xxxxxxxx	tCTGGCTGCTATGGccccctct	--	uncharacterized protein LOC113906999 [Bos indicus x Bos taurus]	-	-	-	-	-	-	-	--
miR-3085-y	MSTRG.7424	1407	1430	-22.9	gGACCGACTCCGTAACGGCGGcgg	x|||||||xxx:||x|||x||xxx	tCTGGCTGC--TATGGCCCCCtct	--	PREDICTED: gametogenetin-like [Capra hircus]	-	-	-	-	-	-	-	--
miR-3547-x	MSTRG.18801	1921	1939	-24.77	tGCCACCCGCACACCCgcc	x|||||||x|x|x|||xxx	gCGGTGGG-GCGCGGGact	MKI67	PREDICTED: antigen KI-67 [Bos mutus]	-	-	-	-	GO:0005694//chromosome;GO:0043231//intracellular membrane-bounded organelle	GO:0003723//RNA binding;GO:0005515//protein binding;GO:0036094//small molecule binding	GO:0000280//nuclear division;GO:0009408//response to heat;GO:0010033//response to organic substance;GO:0031099//regeneration;GO:0044260//cellular macromolecule metabolic process;GO:0044763//single-organism cellular process;GO:1903510//mucopolysaccharide metabolic process	--
miR-3547-x	MSTRG.31466	1273	1290	-22.74	tGCCACCCCttccggtac	x||||||||xxxxxxxxx	gCGGTGGGGcgcgggact	LONRF2	LOW QUALITY PROTEIN: LON peptidase N-terminal domain and RING finger protein 2 [Bos taurus]	-	-	-	-	-	GO:0046914//transition metal ion binding	GO:0019538//protein metabolic process	--
miR-3547-x	MSTRG.33557	288	304	-27.51	gGCCACCCC-CGTCTTcg	x||||||||x||:|:|xx	gCGGTGGGGCGCGGGAct	ARHGAP6	rho GTPase-activating protein 6 isoform X2 [Bos indicus x Bos taurus]	-	-	-	-	GO:0015629//actin cytoskeleton;GO:0044444//cytoplasmic part	GO:0019899//enzyme binding;GO:0019904//protein domain specific binding;GO:0030674//protein binding, bridging;GO:0060229//lipase activator activity	GO:0001953//negative regulation of cell-matrix adhesion;GO:0007045//cell-substrate adherens junction assembly;GO:0008154//actin polymerization or depolymerization;GO:0010863//positive regulation of phospholipase C activity;GO:0032232//negative regulation of actin filament bundle assembly;GO:0043087//regulation of GTPase activity	--
miR-3547-x	MSTRG.4090	11413	11430	-21.34	aGCCACCCCttctagggg	x||||||||xxxxxxxxx	gCGGTGGGGcgcgggact	--	PREDICTED: basic salivary proline-rich protein 1-like isoform X2 [Bos indicus]	-	-	-	-	GO:0031224//intrinsic component of membrane;GO:0044421//extracellular region part	GO:0043169//cation binding;GO:0060089//molecular transducer activity	GO:0007162//negative regulation of cell adhesion;GO:0007169//transmembrane receptor protein tyrosine kinase signaling pathway;GO:0007606//sensory perception of chemical stimulus;GO:0010596//negative regulation of endothelial cell migration;GO:0045765//regulation of angiogenesis;GO:0048869//cellular developmental process;GO:0050922//negative regulation of chemotaxis	--
miR-3547-x	MSTRG.9421	1714	1731	-29.09	cGCCACCCCGCagacgag	x||||||||||xxxxxxx	gCGGTGGGGCGcgggact	--	thymocyte nuclear protein 1 isoform X2 [Odocoileus virginianus texanus]	-	-	-	-	-	-	-	--
miR-9394-y	MSTRG.15104	541	561	-25.03	cCAGCGCCCACGGCGTCGGcg	x|||||||||x:||x|x||xx	tGTCGCGGGT-TCG-ATCCct	--	PREDICTED: phospholipase A2 inhibitor and Ly6/PLAUR domain-containing protein [Bison bison bison]	-	-	-	-	-	-	-	--
miR-9394-y	MSTRG.15669	898	915	-25.36	aCAGCGCCTAA-TTGGagg	x|||||||:||x:|:|xxx	tGTCGCGGGTTCGATCcct	--	-	-	-	-	-	-	-	-	--
miR-2758-x	MSTRG.4090	125	146	-12.2	gGAACCATCccccccactttaa	x||||||||xxxxxxxxxxxxx	aCTTGGTAGaacacgtagtaag	--	PREDICTED: basic salivary proline-rich protein 1-like isoform X2 [Bos indicus]	-	-	-	-	GO:0031224//intrinsic component of membrane;GO:0044421//extracellular region part	GO:0043169//cation binding;GO:0060089//molecular transducer activity	GO:0007162//negative regulation of cell adhesion;GO:0007169//transmembrane receptor protein tyrosine kinase signaling pathway;GO:0007606//sensory perception of chemical stimulus;GO:0010596//negative regulation of endothelial cell migration;GO:0045765//regulation of angiogenesis;GO:0048869//cellular developmental process;GO:0050922//negative regulation of chemotaxis	--
miR-14-y	MSTRG.22496	942	964	-12.32	cGTCAGAACTAAGGTCGAacacg	x|||||||xx|||:xx||xxxxx	tCAGTCTTT-TTCTCTCTcctat	--	endonuclease-reverse transcriptase [Babesia ovata]	-	-	-	-	GO:0031252//cell leading edge;GO:0070161//anchoring junction	GO:0003779//actin binding;GO:0050839//cell adhesion molecule binding	GO:0010468//regulation of gene expression;GO:0098602//single organism cell adhesion	--
miR-14-y	MSTRG.29222	2220	2243	-21.45	gGTCAGAAGGGGTCTGTGTGGAgg	x|||||||:::|xxx|x|x|||xx	tCAGTCTTTTTCT--CTCTCCTat	--	serine/arginine repetitive matrix protein 1-like [Zalophus californianus]	-	-	-	-	GO:0042579//microbody	GO:0005515//protein binding;GO:0016647//oxidoreductase activity, acting on the CH-NH group of donors, oxygen as acceptor	GO:0006596//polyamine biosynthetic process;GO:0006598//polyamine catabolic process;GO:0031328//positive regulation of cellular biosynthetic process;GO:0044710//single-organism metabolic process;GO:0051234//establishment of localization	--
miR-14-y	MSTRG.4090	1837	1858	-10.47	tGTCAGAATAGttcacttaagg	x|||||||x|:xxxxxxxxxxx	tCAGTCTTTTTctctctcctat	--	PREDICTED: basic salivary proline-rich protein 1-like isoform X2 [Bos indicus]	-	-	-	-	GO:0031224//intrinsic component of membrane;GO:0044421//extracellular region part	GO:0043169//cation binding;GO:0060089//molecular transducer activity	GO:0007162//negative regulation of cell adhesion;GO:0007169//transmembrane receptor protein tyrosine kinase signaling pathway;GO:0007606//sensory perception of chemical stimulus;GO:0010596//negative regulation of endothelial cell migration;GO:0045765//regulation of angiogenesis;GO:0048869//cellular developmental process;GO:0050922//negative regulation of chemotaxis	--
miR-203-x	MSTRG.13725	27	46	-14.94	cCACCAAGG--TGTAAGGCTtc	x|||||||:xx|||x|:|x|xx	aGTGGTTCTTAACAGTTCAAca	--	serine/arginine repetitive matrix protein 2-like, partial [Bos taurus]	-	-	-	-	-	-	-	--
miR-203-x	MSTRG.13727	33	52	-14.94	cCACCAAGG--TGTAAGGCTtc	x|||||||:xx|||x|:|x|xx	aGTGGTTCTTAACAGTTCAAca	--	collagen alpha-1(II) chain-like [Bos taurus]	-	-	-	-	-	-	-	--
miR-203-x	MSTRG.15104	164	183	-19.43	tCACCAAGGATAG--AAGTcac	x|||||||:||x|xx||||xxx	aGTGGTTCTTAACAGTTCAaca	--	PREDICTED: phospholipase A2 inhibitor and Ly6/PLAUR domain-containing protein [Bison bison bison]	-	-	-	-	-	-	-	--
miR-203-x	MSTRG.21179	904	923	-16.02	tCACCAAGG-TT-TTACGTcgt	x|||||||:x||x|:|x||xxx	aGTGGTTCTTAACAGTTCAaca	--	LOW QUALITY PROTEIN: collagen alpha-1(IV) chain-like [Phocoena sinus]	-	-	-	-	-	-	-	--
miR-203-x	MSTRG.31308	117	136	-14.94	cCACCAAGG--TGTAAGGCTtc	x|||||||:xx|||x|:|x|xx	aGTGGTTCTTAACAGTTCAAca	--	hornerin-like, partial [Bos taurus]	-	-	-	-	-	-	-	--
miR-203-x	MSTRG.4090	11962	11983	-13.34	aCACCAAGACCTTTGAAGacgg	x||||||||xx|x|x|||xxxx	aGTGGTTCTTAACAGTTCaaca	--	PREDICTED: basic salivary proline-rich protein 1-like isoform X2 [Bos indicus]	-	-	-	-	GO:0031224//intrinsic component of membrane;GO:0044421//extracellular region part	GO:0043169//cation binding;GO:0060089//molecular transducer activity	GO:0007162//negative regulation of cell adhesion;GO:0007169//transmembrane receptor protein tyrosine kinase signaling pathway;GO:0007606//sensory perception of chemical stimulus;GO:0010596//negative regulation of endothelial cell migration;GO:0045765//regulation of angiogenesis;GO:0048869//cellular developmental process;GO:0050922//negative regulation of chemotaxis	--
miR-203-x	MSTRG.9421	1405	1427	-16.76	tCACCAAGACGTTccgtaggaga	x||||||||x:||xxxxxxxxxx	aGTGGTTCT-TAAcagttcaaca	--	thymocyte nuclear protein 1 isoform X2 [Odocoileus virginianus texanus]	-	-	-	-	-	-	-	--
novel-m0003-5p	MSTRG.13725	1	18	-18.01	aAAGGGCCAGgggagaac-	x|||||||x|xxxxxxxxx	tTTCCCGGCCaatgcacca	--	serine/arginine repetitive matrix protein 2-like, partial [Bos taurus]	-	-	-	-	-	-	-	--
novel-m0003-5p	MSTRG.13727	152	170	-18.01	aAAGGGCCAGgggagaact	x|||||||x|xxxxxxxxx	tTTCCCGGCCaatgcacca	--	collagen alpha-1(II) chain-like [Bos taurus]	-	-	-	-	-	-	-	--
novel-m0003-5p	MSTRG.29222	7417	7435	-17.28	cAAGGGCCGacggaagttt	x||||||||xxxxxxxxxx	tTTCCCGGCcaatgcacca	--	serine/arginine repetitive matrix protein 1-like [Zalophus californianus]	-	-	-	-	GO:0042579//microbody	GO:0005515//protein binding;GO:0016647//oxidoreductase activity, acting on the CH-NH group of donors, oxygen as acceptor	GO:0006596//polyamine biosynthetic process;GO:0006598//polyamine catabolic process;GO:0031328//positive regulation of cellular biosynthetic process;GO:0044710//single-organism metabolic process;GO:0051234//establishment of localization	--
novel-m0003-5p	MSTRG.31308	90	108	-18.01	aAAGGGCCAGgggagaact	x|||||||x|xxxxxxxxx	tTTCCCGGCCaatgcacca	--	hornerin-like, partial [Bos taurus]	-	-	-	-	-	-	-	--
novel-m0003-5p	MSTRG.33557	324	342	-25.96	cAAGGGCCGAGTGCGCGgt	x||||||||xx|:||x|xx	tTTCCCGGCCAATGCACca	ARHGAP6	rho GTPase-activating protein 6 isoform X2 [Bos indicus x Bos taurus]	-	-	-	-	GO:0015629//actin cytoskeleton;GO:0044444//cytoplasmic part	GO:0019899//enzyme binding;GO:0019904//protein domain specific binding;GO:0030674//protein binding, bridging;GO:0060229//lipase activator activity	GO:0001953//negative regulation of cell-matrix adhesion;GO:0007045//cell-substrate adherens junction assembly;GO:0008154//actin polymerization or depolymerization;GO:0010863//positive regulation of phospholipase C activity;GO:0032232//negative regulation of actin filament bundle assembly;GO:0043087//regulation of GTPase activity	--
novel-m0003-5p	MSTRG.4090	781	799	-14.81	aAAGGGCCcaaaaattatt	x|||||||xxxxxxxxxxx	tTTCCCGGccaatgcacca	--	PREDICTED: basic salivary proline-rich protein 1-like isoform X2 [Bos indicus]	-	-	-	-	GO:0031224//intrinsic component of membrane;GO:0044421//extracellular region part	GO:0043169//cation binding;GO:0060089//molecular transducer activity	GO:0007162//negative regulation of cell adhesion;GO:0007169//transmembrane receptor protein tyrosine kinase signaling pathway;GO:0007606//sensory perception of chemical stimulus;GO:0010596//negative regulation of endothelial cell migration;GO:0045765//regulation of angiogenesis;GO:0048869//cellular developmental process;GO:0050922//negative regulation of chemotaxis	--
novel-m0007-5p	MSTRG.1213	2510	2539	-30.05	tCTTCCCTTCGGTAAGGGACCTCTTCCCtt	x|||||||xxxxxxx|::x||||:||||xx	tGAAGGGA-------CTTGGGAGGAGGGct	--	-	-	-	-	-	-	-	-	--
novel-m0007-5p	MSTRG.4478	640	661	-30.96	tCTTCCCTGTGCCTTC-TCCaca	x||||||||x:||:||x|||xxx	tGAAGGGACTTGGGAGGAGGgct	F52C9.6	endonuclease-reverse transcriptase [Babesia ovata]	-	-	-	-	-	-	-	--
novel-m0007-5p	MSTRG.9563	1297	1321	-24.84	cCTTCCCTCGGAAGCgggcccgcct	x|||||||xx|||x|xxxxxxxxxx	tGAAGGGA--CTTGGgaggagggct	AHNAK2	PREDICTED: protein AHNAK2 [Bos mutus]	Human Diseases	Infectious disease: bacterial	ko05132//Salmonella infection	K23934	GO:0012506//vesicle membrane;GO:0031674//I band;GO:0044459//plasma membrane part	-	GO:0007009//plasma membrane organization	--
novel-m0012-3p	MSTRG.26854	372	389	-17.98	tACCCTGCGAAAGAAGtg	x||||||||x|x|x|:xx	gTGGGACGCGTGCGTTtt	RGS12	regulator of G-protein signaling 12 isoform X3 [Cervus canadensis]	-	-	-	-	-	-	-	--
novel-m0012-3p	MSTRG.6690	827	845	-20.7	gACCCTGCCGCCCGGAGgg	x|||||||x||x||x|:xx	gTGGGACG-CGTGCGTTtt	--	uncharacterized protein LOC113906999 [Bos indicus x Bos taurus]	-	-	-	-	-	-	-	--
novel-m0031-5p	MSTRG.15958	1452	1479	-32.83	cGGTCCTGGGTGTGTGGTGTTCGACcct	x|||||||||:x|xxxx:||:||||xxx	cCCAGGACCCGGA----GCAGGCTGcgc	--	-	-	-	-	-	-	-	-	--
novel-m0031-5p	MSTRG.17500	331	354	-23.26	gGGTCCTGctatacggaaccttga	x|||||||xxxxxxxxxxxxxxxx	cCCAGGACccggagcaggctgcgc	C4B	complement C4 isoform X1 [Bos taurus]	Human Diseases;Human Diseases;Organismal Systems;Human Diseases	Immune disease;Infectious disease: bacterial;Immune system;Infectious disease: bacterial	ko05322//Systemic lupus erythematosus;ko05150//Staphylococcus aureus infection;ko04610//Complement and coagulation cascades;ko05133//Pertussis	K03989;K03989;K03989;K03989	GO:0016020//membrane;GO:0031988//membrane-bounded vesicle;GO:0044217//other organism part	GO:0001846//opsonin binding;GO:0061135//endopeptidase regulator activity	GO:0002237//response to molecule of bacterial origin;GO:0002673//regulation of acute inflammatory response;GO:0006956//complement activation;GO:0010466//negative regulation of peptidase activity;GO:0019724//B cell mediated immunity;GO:0043277//apoptotic cell clearance	--
novel-m0031-5p	MSTRG.18722	175	198	-23.24	aGGTCCTGTTACCCGggactcggg	x|||||||xxx|x||xxxxxxxxx	cCCAGGACCCGGAGCaggctgcgc	DMBT1	PREDICTED: deleted in malignant brain tumors 1 protein isoform X6 [Bison bison bison]	Organismal Systems	Digestive system	ko04970//Salivary secretion	K13912	GO:0030666//endocytic vesicle membrane;GO:0030667//secretory granule membrane;GO:0031012//extracellular matrix;GO:0044421//extracellular region part;GO:0044425//membrane part	GO:0019899//enzyme binding;GO:0038023//signaling receptor activity;GO:0038024//cargo receptor activity	GO:0001701//in utero embryonic development;GO:0002758//innate immune response-activating signal transduction;GO:0006897//endocytosis;GO:0008283//cell proliferation;GO:0019731//antibacterial humoral response;GO:0030856//regulation of epithelial cell differentiation	--
novel-m0031-5p	MSTRG.21507	1180	1204	-31.3	aGGTCCTGGCACCTCGACCAGTGgt	x||||||||xx|||||x||x::|xx	cCCAGGACCC-GGAGCAGGCTGCgc	Slc29a2	equilibrative nucleoside transporter 2 isoform X2 [Bos taurus]	Human Diseases	Substance dependence	ko05034//Alcoholism	K15014	GO:0016021//integral component of membrane;GO:0031090//organelle membrane;GO:0043231//intracellular membrane-bounded organelle;GO:0043232//intracellular non-membrane-bounded organelle	GO:0015932//nucleobase-containing compound transmembrane transporter activity	GO:0006725//cellular aromatic compound metabolic process;GO:0006863//purine nucleobase transport;GO:0007589//body fluid secretion;GO:0015855//pyrimidine nucleobase transport;GO:0015864//pyrimidine nucleoside transport;GO:0032868//response to insulin;GO:0044763//single-organism cellular process	--
novel-m0031-5p	MSTRG.22162	176	203	-31.94	aGGTCCTGGGGTACTGAGTCGCGACcct	x|||||||||x:x|xxx|||x||||xxx	cCCAGGACCCGGAG---CAG-GCTGcgc	--	translation initiation factor IF-2-like [Cervus canadensis]	-	-	-	-	-	-	-	--
novel-m0031-5p	MSTRG.3598	788	811	-22.46	gGGTCCTGaacagaactaaagaaa	x|||||||xxxxxxxxxxxxxxxx	cCCAGGACccggagcaggctgcgc	OPTN	PREDICTED: optineurin isoform X2 [Bos mutus]	Cellular Processes	Transport and catabolism	ko04137//Mitophagy - animal	K19946	-	-	-	--
novel-m0031-5p	MSTRG.4478	3569	3592	-22.89	gGGTCCTGactagaggaaatctta	x|||||||xxxxxxxxxxxxxxxx	cCCAGGACccggagcaggctgcgc	F52C9.6	endonuclease-reverse transcriptase [Babesia ovata]	-	-	-	-	-	-	-	--
novel-m0031-5p	MSTRG.7032	593	616	-20.87	aGGTCCTGAGAGACGGCGGACtcc	x|||||||x|xxx||x|x|||xxx	cCCAGGACCCGGAGCAGGCTGcgc	--	arf-GAP with dual PH domain-containing protein 2 isoform X1 [Cervus canadensis]	-	-	-	-	-	GO:0016647//oxidoreductase activity, acting on the CH-NH group of donors, oxygen as acceptor	GO:0006598//polyamine catabolic process;GO:0010467//gene expression;GO:0044238//primary metabolic process;GO:0044271//cellular nitrogen compound biosynthetic process;GO:1901576//organic substance biosynthetic process	--
novel-m0031-5p	MSTRG.9567	277	300	-26.37	tGGTCCTGGaggcggaggagccgc	x||||||||xxxxxxxxxxxxxxx	cCCAGGACCcggagcaggctgcgc	AHNAK2	protein AHNAK2 isoform X1 [Bos indicus x Bos taurus]	Human Diseases	Infectious disease: bacterial	ko05132//Salmonella infection	K23934	GO:0012506//vesicle membrane;GO:0031674//I band;GO:0044459//plasma membrane part	-	GO:0007009//plasma membrane organization	--
novel-m0032-5p	MSTRG.15958	1452	1479	-32.83	cGGTCCTGGGTGTGTGGTGTTCGACcct	x|||||||||:x|xxxx:||:||||xxx	cCCAGGACCCGGA----GCAGGCTGcgc	--	-	-	-	-	-	-	-	-	--
novel-m0032-5p	MSTRG.17500	331	354	-23.26	gGGTCCTGctatacggaaccttga	x|||||||xxxxxxxxxxxxxxxx	cCCAGGACccggagcaggctgcgc	C4B	complement C4 isoform X1 [Bos taurus]	Human Diseases;Human Diseases;Organismal Systems;Human Diseases	Immune disease;Infectious disease: bacterial;Immune system;Infectious disease: bacterial	ko05322//Systemic lupus erythematosus;ko05150//Staphylococcus aureus infection;ko04610//Complement and coagulation cascades;ko05133//Pertussis	K03989;K03989;K03989;K03989	GO:0016020//membrane;GO:0031988//membrane-bounded vesicle;GO:0044217//other organism part	GO:0001846//opsonin binding;GO:0061135//endopeptidase regulator activity	GO:0002237//response to molecule of bacterial origin;GO:0002673//regulation of acute inflammatory response;GO:0006956//complement activation;GO:0010466//negative regulation of peptidase activity;GO:0019724//B cell mediated immunity;GO:0043277//apoptotic cell clearance	--
novel-m0032-5p	MSTRG.18722	175	198	-23.24	aGGTCCTGTTACCCGggactcggg	x|||||||xxx|x||xxxxxxxxx	cCCAGGACCCGGAGCaggctgcgc	DMBT1	PREDICTED: deleted in malignant brain tumors 1 protein isoform X6 [Bison bison bison]	Organismal Systems	Digestive system	ko04970//Salivary secretion	K13912	GO:0030666//endocytic vesicle membrane;GO:0030667//secretory granule membrane;GO:0031012//extracellular matrix;GO:0044421//extracellular region part;GO:0044425//membrane part	GO:0019899//enzyme binding;GO:0038023//signaling receptor activity;GO:0038024//cargo receptor activity	GO:0001701//in utero embryonic development;GO:0002758//innate immune response-activating signal transduction;GO:0006897//endocytosis;GO:0008283//cell proliferation;GO:0019731//antibacterial humoral response;GO:0030856//regulation of epithelial cell differentiation	--
novel-m0032-5p	MSTRG.21507	1180	1204	-31.3	aGGTCCTGGCACCTCGACCAGTGgt	x||||||||xx|||||x||x::|xx	cCCAGGACCC-GGAGCAGGCTGCgc	Slc29a2	equilibrative nucleoside transporter 2 isoform X2 [Bos taurus]	Human Diseases	Substance dependence	ko05034//Alcoholism	K15014	GO:0016021//integral component of membrane;GO:0031090//organelle membrane;GO:0043231//intracellular membrane-bounded organelle;GO:0043232//intracellular non-membrane-bounded organelle	GO:0015932//nucleobase-containing compound transmembrane transporter activity	GO:0006725//cellular aromatic compound metabolic process;GO:0006863//purine nucleobase transport;GO:0007589//body fluid secretion;GO:0015855//pyrimidine nucleobase transport;GO:0015864//pyrimidine nucleoside transport;GO:0032868//response to insulin;GO:0044763//single-organism cellular process	--
novel-m0032-5p	MSTRG.22162	176	203	-31.94	aGGTCCTGGGGTACTGAGTCGCGACcct	x|||||||||x:x|xxx|||x||||xxx	cCCAGGACCCGGAG---CAG-GCTGcgc	--	translation initiation factor IF-2-like [Cervus canadensis]	-	-	-	-	-	-	-	--
novel-m0032-5p	MSTRG.3598	788	811	-22.46	gGGTCCTGaacagaactaaagaaa	x|||||||xxxxxxxxxxxxxxxx	cCCAGGACccggagcaggctgcgc	OPTN	PREDICTED: optineurin isoform X2 [Bos mutus]	Cellular Processes	Transport and catabolism	ko04137//Mitophagy - animal	K19946	-	-	-	--
novel-m0032-5p	MSTRG.4478	3569	3592	-22.89	gGGTCCTGactagaggaaatctta	x|||||||xxxxxxxxxxxxxxxx	cCCAGGACccggagcaggctgcgc	F52C9.6	endonuclease-reverse transcriptase [Babesia ovata]	-	-	-	-	-	-	-	--
novel-m0032-5p	MSTRG.7032	593	616	-20.87	aGGTCCTGAGAGACGGCGGACtcc	x|||||||x|xxx||x|x|||xxx	cCCAGGACCCGGAGCAGGCTGcgc	--	arf-GAP with dual PH domain-containing protein 2 isoform X1 [Cervus canadensis]	-	-	-	-	-	GO:0016647//oxidoreductase activity, acting on the CH-NH group of donors, oxygen as acceptor	GO:0006598//polyamine catabolic process;GO:0010467//gene expression;GO:0044238//primary metabolic process;GO:0044271//cellular nitrogen compound biosynthetic process;GO:1901576//organic substance biosynthetic process	--
novel-m0032-5p	MSTRG.9567	277	300	-26.37	tGGTCCTGGaggcggaggagccgc	x||||||||xxxxxxxxxxxxxxx	cCCAGGACCcggagcaggctgcgc	AHNAK2	protein AHNAK2 isoform X1 [Bos indicus x Bos taurus]	Human Diseases	Infectious disease: bacterial	ko05132//Salmonella infection	K23934	GO:0012506//vesicle membrane;GO:0031674//I band;GO:0044459//plasma membrane part	-	GO:0007009//plasma membrane organization	--
novel-m0036-3p	MSTRG.1213	2790	2810	-17.21	aCTCTCCTC-GACCGACTTcga	x|||||||xx|x|x||||:xxx	gGAGAGGACACCGTCTGAGtgg	--	-	-	-	-	-	-	-	-	--
novel-m0036-3p	MSTRG.15958	3036	3057	-19.19	gCTCTCCTCCGAACGAGTCGga	x|||||||xx|xxx||x||:xx	gGAGAGGACACCGTCTGAGTgg	--	-	-	-	-	-	-	-	-	--
novel-m0036-3p	MSTRG.17500	2224	2246	-16.78	aCTCTCCTTTCCCTAGTCGCttc	x|||||||x|xx|x||x|x|xxx	gGAGAGGACACCG-TCTGAGtgg	C4B	complement C4 isoform X1 [Bos taurus]	Human Diseases;Human Diseases;Organismal Systems;Human Diseases	Immune disease;Infectious disease: bacterial;Immune system;Infectious disease: bacterial	ko05322//Systemic lupus erythematosus;ko05150//Staphylococcus aureus infection;ko04610//Complement and coagulation cascades;ko05133//Pertussis	K03989;K03989;K03989;K03989	GO:0016020//membrane;GO:0031988//membrane-bounded vesicle;GO:0044217//other organism part	GO:0001846//opsonin binding;GO:0061135//endopeptidase regulator activity	GO:0002237//response to molecule of bacterial origin;GO:0002673//regulation of acute inflammatory response;GO:0006956//complement activation;GO:0010466//negative regulation of peptidase activity;GO:0019724//B cell mediated immunity;GO:0043277//apoptotic cell clearance	--
novel-m0036-3p	MSTRG.17502	477	497	-14.39	gCTCTCCTCTTGTTGTC-CAac	x|||||||x|x|:x|x|x||xx	gGAGAGGACACCGTCTGAGTgg	C4A	PREDICTED: complement C4-B-like isoform X1 [Bison bison bison]	Human Diseases;Human Diseases;Organismal Systems;Human Diseases	Immune disease;Infectious disease: bacterial;Immune system;Infectious disease: bacterial	ko05322//Systemic lupus erythematosus;ko05150//Staphylococcus aureus infection;ko04610//Complement and coagulation cascades;ko05133//Pertussis	K03989;K03989;K03989;K03989	GO:0016020//membrane;GO:0031988//membrane-bounded vesicle;GO:0044217//other organism part	GO:0001846//opsonin binding;GO:0061135//endopeptidase regulator activity	GO:0002237//response to molecule of bacterial origin;GO:0002673//regulation of acute inflammatory response;GO:0006956//complement activation;GO:0010466//negative regulation of peptidase activity;GO:0019724//B cell mediated immunity;GO:0043277//apoptotic cell clearance	--
novel-m0036-3p	MSTRG.4478	4697	4717	-17.4	gCTCTCCTTACCCAC-CTCcct	x|||||||xxxx||xx|||xxx	gGAGAGGACACCGTCTGAGtgg	F52C9.6	endonuclease-reverse transcriptase [Babesia ovata]	-	-	-	-	-	-	-	--
novel-m0036-3p	MSTRG.5822	590	609	-20.71	cCTCTCCTTT--CAGATgaggt	x|||||||x|xx||||:xxxxx	gGAGAGGACACCGTCTGagtgg	--	-	-	-	-	-	-	-	-	--
novel-m0037-3p	MSTRG.1213	2790	2810	-17.21	aCTCTCCTC-GACCGACTTcga	x|||||||xx|x|x||||:xxx	gGAGAGGACACCGTCTGAGtgg	--	-	-	-	-	-	-	-	-	--
novel-m0037-3p	MSTRG.15958	3036	3057	-19.19	gCTCTCCTCCGAACGAGTCGga	x|||||||xx|xxx||x||:xx	gGAGAGGACACCGTCTGAGTgg	--	-	-	-	-	-	-	-	-	--
novel-m0037-3p	MSTRG.17500	2224	2246	-16.78	aCTCTCCTTTCCCTAGTCGCttc	x|||||||x|xx|x||x|x|xxx	gGAGAGGACACCG-TCTGAGtgg	C4B	complement C4 isoform X1 [Bos taurus]	Human Diseases;Human Diseases;Organismal Systems;Human Diseases	Immune disease;Infectious disease: bacterial;Immune system;Infectious disease: bacterial	ko05322//Systemic lupus erythematosus;ko05150//Staphylococcus aureus infection;ko04610//Complement and coagulation cascades;ko05133//Pertussis	K03989;K03989;K03989;K03989	GO:0016020//membrane;GO:0031988//membrane-bounded vesicle;GO:0044217//other organism part	GO:0001846//opsonin binding;GO:0061135//endopeptidase regulator activity	GO:0002237//response to molecule of bacterial origin;GO:0002673//regulation of acute inflammatory response;GO:0006956//complement activation;GO:0010466//negative regulation of peptidase activity;GO:0019724//B cell mediated immunity;GO:0043277//apoptotic cell clearance	--
novel-m0037-3p	MSTRG.17502	477	497	-14.39	gCTCTCCTCTTGTTGTC-CAac	x|||||||x|x|:x|x|x||xx	gGAGAGGACACCGTCTGAGTgg	C4A	PREDICTED: complement C4-B-like isoform X1 [Bison bison bison]	Human Diseases;Human Diseases;Organismal Systems;Human Diseases	Immune disease;Infectious disease: bacterial;Immune system;Infectious disease: bacterial	ko05322//Systemic lupus erythematosus;ko05150//Staphylococcus aureus infection;ko04610//Complement and coagulation cascades;ko05133//Pertussis	K03989;K03989;K03989;K03989	GO:0016020//membrane;GO:0031988//membrane-bounded vesicle;GO:0044217//other organism part	GO:0001846//opsonin binding;GO:0061135//endopeptidase regulator activity	GO:0002237//response to molecule of bacterial origin;GO:0002673//regulation of acute inflammatory response;GO:0006956//complement activation;GO:0010466//negative regulation of peptidase activity;GO:0019724//B cell mediated immunity;GO:0043277//apoptotic cell clearance	--
novel-m0037-3p	MSTRG.4478	4697	4717	-17.4	gCTCTCCTTACCCAC-CTCcct	x|||||||xxxx||xx|||xxx	gGAGAGGACACCGTCTGAGtgg	F52C9.6	endonuclease-reverse transcriptase [Babesia ovata]	-	-	-	-	-	-	-	--
novel-m0037-3p	MSTRG.5822	590	609	-20.71	cCTCTCCTTT--CAGATgaggt	x|||||||x|xx||||:xxxxx	gGAGAGGACACCGTCTGagtgg	--	-	-	-	-	-	-	-	-	--
novel-m0029-3p	MSTRG.1213	519	539	-14.44	cGTTGGACTT-TGTCTAttgac	x|||||||||x:x|x||xxxxx	aCAACCTGAATGAACATtttgg	--	-	-	-	-	-	-	-	-	--
novel-m0029-3p	MSTRG.15958	2495	2517	-13.67	aGTTGGACCTCTACTT-TAttgtt	x|||||||x|x|||||x||xxxxx	aCAACCTG-A-ATGAACATtttgg	--	-	-	-	-	-	-	-	-	--
novel-m0029-3p	MSTRG.17502	136	157	-13.54	cGTTGGACccgaagacgtctct	x|||||||xxxxxxxxxxxxxx	aCAACCTGaatgaacattttgg	C4A	PREDICTED: complement C4-B-like isoform X1 [Bison bison bison]	Human Diseases;Human Diseases;Organismal Systems;Human Diseases	Immune disease;Infectious disease: bacterial;Immune system;Infectious disease: bacterial	ko05322//Systemic lupus erythematosus;ko05150//Staphylococcus aureus infection;ko04610//Complement and coagulation cascades;ko05133//Pertussis	K03989;K03989;K03989;K03989	GO:0016020//membrane;GO:0031988//membrane-bounded vesicle;GO:0044217//other organism part	GO:0001846//opsonin binding;GO:0061135//endopeptidase regulator activity	GO:0002237//response to molecule of bacterial origin;GO:0002673//regulation of acute inflammatory response;GO:0006956//complement activation;GO:0010466//negative regulation of peptidase activity;GO:0019724//B cell mediated immunity;GO:0043277//apoptotic cell clearance	--
novel-m0029-3p	MSTRG.18722	314	337	-12.94	gGTTGGACCTCAACTCCTCAActa	x|||||||x|xx|||xx|x||xxx	aCAACCTGAA--TGAACATTTtgg	DMBT1	PREDICTED: deleted in malignant brain tumors 1 protein isoform X6 [Bison bison bison]	Organismal Systems	Digestive system	ko04970//Salivary secretion	K13912	GO:0030666//endocytic vesicle membrane;GO:0030667//secretory granule membrane;GO:0031012//extracellular matrix;GO:0044421//extracellular region part;GO:0044425//membrane part	GO:0019899//enzyme binding;GO:0038023//signaling receptor activity;GO:0038024//cargo receptor activity	GO:0001701//in utero embryonic development;GO:0002758//innate immune response-activating signal transduction;GO:0006897//endocytosis;GO:0008283//cell proliferation;GO:0019731//antibacterial humoral response;GO:0030856//regulation of epithelial cell differentiation	--
novel-m0029-3p	MSTRG.5822	133	156	-20.24	tGTTGGACGTGAACTTGAACGAct	x|||||||x|xx|||||x|x:|xx	aCAACCTGAA--TGAACATTTTgg	--	-	-	-	-	-	-	-	-	--
novel-m0029-3p	MSTRG.6892	1106	1127	-13.71	cGTTGGACTCGACGT-TACAAat	x||||||||xx||x|x||x||xx	aCAACCTGAA-TGAACATTTTgg	ABCC4	multidrug resistance-associated protein 4 [Bos taurus]	Environmental Information Processing;Organismal Systems;Environmental Information Processing;Human Diseases	Signal transduction;Digestive system;Membrane transport;Drug resistance: antineoplastic	ko04024//cAMP signaling pathway;ko04976//Bile secretion;ko02010//ABC transporters;ko01523//Antifolate resistance	K05673;K05673;K05673;K05673	GO:0030667//secretory granule membrane;GO:0031224//intrinsic component of membrane	GO:0015405//P-P-bond-hydrolysis-driven transmembrane transporter activity;GO:0016616//oxidoreductase activity, acting on the CH-OH group of donors, NAD or NADP as acceptor;GO:0017111//nucleoside-triphosphatase activity;GO:0032550//purine ribonucleoside binding	GO:0001775//cell activation;GO:0006821//chloride transport;GO:0007599//hemostasis;GO:0008284//positive regulation of cell proliferation;GO:0009719//response to endogenous stimulus;GO:0010033//response to organic substance;GO:0044710//single-organism metabolic process	--
novel-m0029-3p	MSTRG.8786	187	210	-14.89	cGTTGGACAAAGGTCAGTAAtcca	x|||||||xx|xx|xx||||xxxx	aCAACCTGAATGAA--CATTttgg	gag	PREDICTED: LOW QUALITY PROTEIN: endogenous retrovirus group K member 7 Gag polyprotein-like [Bos mutus]	-	-	-	-	-	GO:0031779//melanocortin receptor binding	GO:0006725//cellular aromatic compound metabolic process;GO:0033059//cellular pigmentation;GO:0065007//biological regulation;GO:1901360//organic cyclic compound metabolic process	--
novel-m0019-3p	MSTRG.33557	1223	1243	-13.64	aTTGTTCT-GTGTAcgcccacc	x|||||||x|||:|xxxxxxxx	gAACAAGATCACGTctctcaga	ARHGAP6	rho GTPase-activating protein 6 isoform X2 [Bos indicus x Bos taurus]	-	-	-	-	GO:0015629//actin cytoskeleton;GO:0044444//cytoplasmic part	GO:0019899//enzyme binding;GO:0019904//protein domain specific binding;GO:0030674//protein binding, bridging;GO:0060229//lipase activator activity	GO:0001953//negative regulation of cell-matrix adhesion;GO:0007045//cell-substrate adherens junction assembly;GO:0008154//actin polymerization or depolymerization;GO:0010863//positive regulation of phospholipase C activity;GO:0032232//negative regulation of actin filament bundle assembly;GO:0043087//regulation of GTPase activity	--
novel-m0019-3p	MSTRG.4090	6866	6889	-10.23	tTTGTTCTTAAAGGAAAAGAaatg	x|||||||xx|xx|x|x|||xxxx	gAACAAGA--TCACGTCTCTcaga	--	PREDICTED: basic salivary proline-rich protein 1-like isoform X2 [Bos indicus]	-	-	-	-	GO:0031224//intrinsic component of membrane;GO:0044421//extracellular region part	GO:0043169//cation binding;GO:0060089//molecular transducer activity	GO:0007162//negative regulation of cell adhesion;GO:0007169//transmembrane receptor protein tyrosine kinase signaling pathway;GO:0007606//sensory perception of chemical stimulus;GO:0010596//negative regulation of endothelial cell migration;GO:0045765//regulation of angiogenesis;GO:0048869//cellular developmental process;GO:0050922//negative regulation of chemotaxis	--
novel-m0043-3p	MSTRG.10777	223	243	-14.23	cTTGGGCTcagaggacgtaat	x|||||||xxxxxxxxxxxxx	aAACCCGAacgaactttttgg	--	GRAM domain-containing protein 2B isoform X2 [Bos taurus]	Cellular Processes	Transport and catabolism	ko04146//Peroxisome	K00308	GO:0005737//cytoplasm;GO:0043231//intracellular membrane-bounded organelle	GO:0005515//protein binding;GO:0016647//oxidoreductase activity, acting on the CH-NH group of donors, oxygen as acceptor	GO:0006596//polyamine biosynthetic process;GO:0006598//polyamine catabolic process;GO:0009653//anatomical structure morphogenesis;GO:0016043//cellular component organization;GO:0031325//positive regulation of cellular metabolic process;GO:0031326//regulation of cellular biosynthetic process;GO:0044763//single-organism cellular process;GO:0048523//negative regulation of cellular process;GO:0048731…	--
novel-m0044-3p	MSTRG.10777	223	243	-14.23	cTTGGGCTcagaggacgtaat	x|||||||xxxxxxxxxxxxx	aAACCCGAacgaactttttgg	--	GRAM domain-containing protein 2B isoform X2 [Bos taurus]	Cellular Processes	Transport and catabolism	ko04146//Peroxisome	K00308	GO:0005737//cytoplasm;GO:0043231//intracellular membrane-bounded organelle	GO:0005515//protein binding;GO:0016647//oxidoreductase activity, acting on the CH-NH group of donors, oxygen as acceptor	GO:0006596//polyamine biosynthetic process;GO:0006598//polyamine catabolic process;GO:0009653//anatomical structure morphogenesis;GO:0016043//cellular component organization;GO:0031325//positive regulation of cellular metabolic process;GO:0031326//regulation of cellular biosynthetic process;GO:0044763//single-organism cellular process;GO:0048523//negative regulation of cellular process;GO:0048731…	--
novel-m0024-3p	MSTRG.5822	1314	1334	-14.84	tTTGAGTT-GTCCCAAGAGacc	x|||||||x||xxx||:|:xxx	aAACTCAAACAAACTTTTTggt	--	-	-	-	-	-	-	-	-	--
novel-m0025-3p	MSTRG.5822	1314	1334	-14.84	tTTGAGTT-GTCCCAAGAGacc	x|||||||x||xxx||:|:xxx	aAACTCAAACAAACTTTTTggt	--	-	-	-	-	-	-	-	-	--
novel-m0026-3p	MSTRG.5822	1314	1334	-14.84	tTTGAGTT-GTCCCAAGAGacc	x|||||||x||xxx||:|:xxx	aAACTCAAACAAACTTTTTggt	--	-	-	-	-	-	-	-	-	--
novel-m0059-3p	MSTRG.14602	1031	1051	-16.51	gTCGACGAccgacccttcaag	x|||||||xxxxxxxxxxxxx	cAGCTGCTtcccctgacactc	ZNF671	zinc finger protein 28 homolog [Zalophus californianus]	Human Diseases	Infectious disease: viral	ko05168//Herpes simplex virus 1 infection	K09228	-	-	-	--
novel-m0059-3p	MSTRG.18801	1748	1768	-14.21	tTCGACGActgcagtcgacgc	x|||||||xxxxxxxxxxxxx	cAGCTGCTtcccctgacactc	MKI67	PREDICTED: antigen KI-67 [Bos mutus]	-	-	-	-	GO:0005694//chromosome;GO:0043231//intracellular membrane-bounded organelle	GO:0003723//RNA binding;GO:0005515//protein binding;GO:0036094//small molecule binding	GO:0000280//nuclear division;GO:0009408//response to heat;GO:0010033//response to organic substance;GO:0031099//regeneration;GO:0044260//cellular macromolecule metabolic process;GO:0044763//single-organism cellular process;GO:1903510//mucopolysaccharide metabolic process	--
novel-m0059-3p	MSTRG.1997	47	67	-20.83	gTCGACGAGGACGTCgcggcg	x|||||||:|xx|x|xxxxxx	cAGCTGCTTCCCCTGacactc	DACT2	dapper homolog 2 [Bos indicus x Bos taurus]	-	-	-	-	GO:0043231//intracellular membrane-bounded organelle	GO:0019901//protein kinase binding	GO:0000904//cell morphogenesis involved in differentiation;GO:0007155//cell adhesion;GO:0030097//hemopoiesis;GO:0032926//negative regulation of activin receptor signaling pathway;GO:0072044//collecting duct development	--
novel-m0059-3p	MSTRG.29222	8328	8349	-14.6	tTCGACGAACCAGGTAC-GTcac	x||||||||xxx||x||x||xxx	cAGCTGCTTC--CCCTGACActc	--	serine/arginine repetitive matrix protein 1-like [Zalophus californianus]	-	-	-	-	GO:0042579//microbody	GO:0005515//protein binding;GO:0016647//oxidoreductase activity, acting on the CH-NH group of donors, oxygen as acceptor	GO:0006596//polyamine biosynthetic process;GO:0006598//polyamine catabolic process;GO:0031328//positive regulation of cellular biosynthetic process;GO:0044710//single-organism metabolic process;GO:0051234//establishment of localization	--
novel-m0059-3p	MSTRG.3691	5	25	-17.6	aTCGACGACGAGGACcccgta	x|||||||x|x||||xxxxxx	cAGCTGCTTCCCCTGacactc	MRC1	PREDICTED: macrophage mannose receptor 1 [Bos mutus]	Human Diseases;Cellular Processes	Infectious disease: bacterial;Transport and catabolism	ko05152//Tuberculosis;ko04145//Phagosome	K06560;K06560	GO:0016021//integral component of membrane;GO:0031090//organelle membrane;GO:0044464//cell part	GO:0038023//signaling receptor activity;GO:0048029//monosaccharide binding	GO:0006897//endocytosis;GO:0032496//response to lipopolysaccharide;GO:0034341//response to interferon-gamma;GO:0050794//regulation of cellular process;GO:0070670//response to interleukin-4	--
novel-m0059-3p	MSTRG.4090	544	563	-20.57	cTCGACGATCGG-ACTCTGgt	x|||||||xx||x|||x||xx	cAGCTGCTTCCCCTGACACtc	--	PREDICTED: basic salivary proline-rich protein 1-like isoform X2 [Bos indicus]	-	-	-	-	GO:0031224//intrinsic component of membrane;GO:0044421//extracellular region part	GO:0043169//cation binding;GO:0060089//molecular transducer activity	GO:0007162//negative regulation of cell adhesion;GO:0007169//transmembrane receptor protein tyrosine kinase signaling pathway;GO:0007606//sensory perception of chemical stimulus;GO:0010596//negative regulation of endothelial cell migration;GO:0045765//regulation of angiogenesis;GO:0048869//cellular developmental process;GO:0050922//negative regulation of chemotaxis	--
novel-m0059-3p	MSTRG.4101	319	339	-16.57	tTCGACGACGACGAagagact	x|||||||x|xx||xxxxxxx	cAGCTGCTTCCCCTgacactc	--	-	-	-	-	-	-	-	-	--
novel-m0059-3p	MSTRG.6869	414	434	-10.81	cTCGACGAtacaaatgatctt	x|||||||xxxxxxxxxxxxx	cAGCTGCTtcccctgacactc	ABCC4	multidrug resistance-associated protein 4-like isoform X1 [Bos indicus x Bos taurus]	Environmental Information Processing;Organismal Systems;Environmental Information Processing;Human Diseases	Signal transduction;Digestive system;Membrane transport;Drug resistance: antineoplastic	ko04024//cAMP signaling pathway;ko04976//Bile secretion;ko02010//ABC transporters;ko01523//Antifolate resistance	K05673;K05673;K05673;K05673	GO:0030667//secretory granule membrane;GO:0031224//intrinsic component of membrane	GO:0015405//P-P-bond-hydrolysis-driven transmembrane transporter activity;GO:0016616//oxidoreductase activity, acting on the CH-OH group of donors, NAD or NADP as acceptor;GO:0016887//ATPase activity;GO:0032550//purine ribonucleoside binding	GO:0001775//cell activation;GO:0006811//ion transport;GO:0007599//hemostasis;GO:0008284//positive regulation of cell proliferation;GO:0009719//response to endogenous stimulus;GO:0010033//response to organic substance;GO:0015893//drug transport;GO:0044710//single-organism metabolic process	--
novel-m0059-3p	MSTRG.9831	83	103	-13.25	cTCGACGAGGtcccagaaccc	x|||||||:|xxxxxxxxxxx	cAGCTGCTTCccctgacactc	Arc	PREDICTED: LOW QUALITY PROTEIN: activity-regulated cytoskeleton-associated protein [Bos mutus]	Human Diseases	Substance dependence	ko05031//Amphetamine addiction	K15867	GO:0005856//cytoskeleton;GO:0030141//secretory granule;GO:0044309//neuron spine;GO:0097060//synaptic membrane	GO:0005488//binding	GO:0003002//regionalization;GO:0006996//organelle organization;GO:0007611//learning or memory;GO:0009888//tissue development;GO:0016192//vesicle-mediated transport;GO:0022603//regulation of anatomical structure morphogenesis;GO:0032414//positive regulation of ion transmembrane transporter activity;GO:0048167//regulation of synaptic plasticity;GO:0048870//cell motility	--
novel-m0028-3p	MSTRG.18801	1980	2001	-21.31	cCTGAAGACTTCTTAGAagaaa	x||||||||::||:x||xxxxx	cGACTTCTGGGGAGCCTggtgt	MKI67	PREDICTED: antigen KI-67 [Bos mutus]	-	-	-	-	GO:0005694//chromosome;GO:0043231//intracellular membrane-bounded organelle	GO:0003723//RNA binding;GO:0005515//protein binding;GO:0036094//small molecule binding	GO:0000280//nuclear division;GO:0009408//response to heat;GO:0010033//response to organic substance;GO:0031099//regeneration;GO:0044260//cellular macromolecule metabolic process;GO:0044763//single-organism cellular process;GO:1903510//mucopolysaccharide metabolic process	--
novel-m0028-3p	MSTRG.31466	502	524	-15.63	cCTGAAGAGGTCGTCCGGCGAgt	x|||||||xx:|x||x|:|x|xx	cGACTTCTGGGG-AGCCTGGTgt	LONRF2	LOW QUALITY PROTEIN: LON peptidase N-terminal domain and RING finger protein 2 [Bos taurus]	-	-	-	-	-	GO:0046914//transition metal ion binding	GO:0019538//protein metabolic process	--
novel-m0028-3p	MSTRG.33557	788	814	-31.59	gCTGAAGAGGACGCCCCACGACCCAca	x|||||||xxxxx||||x||xx|||xx	cGACTTCT-----GGGGAGCCTGGTgt	ARHGAP6	rho GTPase-activating protein 6 isoform X2 [Bos indicus x Bos taurus]	-	-	-	-	GO:0015629//actin cytoskeleton;GO:0044444//cytoplasmic part	GO:0019899//enzyme binding;GO:0019904//protein domain specific binding;GO:0030674//protein binding, bridging;GO:0060229//lipase activator activity	GO:0001953//negative regulation of cell-matrix adhesion;GO:0007045//cell-substrate adherens junction assembly;GO:0008154//actin polymerization or depolymerization;GO:0010863//positive regulation of phospholipase C activity;GO:0032232//negative regulation of actin filament bundle assembly;GO:0043087//regulation of GTPase activity	--
novel-m0028-3p	MSTRG.4101	687	706	-23.13	tCTGAAGACCAG--GGACTcgg	x|||||||||xxxx||||:xxx	cGACTTCTGGGGAGCCTGGtgt	--	-	-	-	-	-	-	-	-	--
novel-m0045-3p	MSTRG.10777	223	243	-14.23	cTTGGGCTcagaggacgtaat	x|||||||xxxxxxxxxxxxx	aAACCCGAacgaactttttgg	--	GRAM domain-containing protein 2B isoform X2 [Bos taurus]	Cellular Processes	Transport and catabolism	ko04146//Peroxisome	K00308	GO:0005737//cytoplasm;GO:0043231//intracellular membrane-bounded organelle	GO:0005515//protein binding;GO:0016647//oxidoreductase activity, acting on the CH-NH group of donors, oxygen as acceptor	GO:0006596//polyamine biosynthetic process;GO:0006598//polyamine catabolic process;GO:0009653//anatomical structure morphogenesis;GO:0016043//cellular component organization;GO:0031325//positive regulation of cellular metabolic process;GO:0031326//regulation of cellular biosynthetic process;GO:0044763//single-organism cellular process;GO:0048523//negative regulation of cellular process;GO:0048731…	--
novel-m0039-3p	MSTRG.13725	34	57	-18.65	cACCGGAGTACccaccaaggtgta	x|||||||x||xxxxxxxxxxxxx	tTGGCCTC-TGtccaccatcaagt	--	serine/arginine repetitive matrix protein 2-like, partial [Bos taurus]	-	-	-	-	-	-	-	--
novel-m0039-3p	MSTRG.13727	40	63	-18.65	cACCGGAGTACccaccaaggtgta	x|||||||x||xxxxxxxxxxxxx	tTGGCCTC-TGtccaccatcaagt	--	collagen alpha-1(II) chain-like [Bos taurus]	-	-	-	-	-	-	-	--
novel-m0039-3p	MSTRG.1998	1047	1068	-25.55	gACCGGAG-CAGGGGcgacgaga	x|||||||x||||x|xxxxxxxx	tTGGCCTCTGTCCACcatcaagt	DACT2	dapper homolog 2 [Bos indicus x Bos taurus]	-	-	-	-	GO:0043231//intracellular membrane-bounded organelle	GO:0019901//protein kinase binding	GO:0000904//cell morphogenesis involved in differentiation;GO:0007155//cell adhesion;GO:0032926//negative regulation of activin receptor signaling pathway;GO:0072044//collecting duct development	--
novel-m0039-3p	MSTRG.21179	438	460	-25.49	gACCGGAGGGAAGGGGTctcacg	x|||||||:x|x|x|||xxxxxx	tTGGCCTCTGTCCACCAtcaagt	--	LOW QUALITY PROTEIN: collagen alpha-1(IV) chain-like [Phocoena sinus]	-	-	-	-	-	-	-	--
novel-m0039-3p	MSTRG.29222	2635	2657	-15.13	gACCGGAGctcctatcagcgacc	x|||||||xxxxxxxxxxxxxxx	tTGGCCTCtgtccaccatcaagt	--	serine/arginine repetitive matrix protein 1-like [Zalophus californianus]	-	-	-	-	GO:0042579//microbody	GO:0005515//protein binding;GO:0016647//oxidoreductase activity, acting on the CH-NH group of donors, oxygen as acceptor	GO:0006596//polyamine biosynthetic process;GO:0006598//polyamine catabolic process;GO:0031328//positive regulation of cellular biosynthetic process;GO:0044710//single-organism metabolic process;GO:0051234//establishment of localization	--
novel-m0039-3p	MSTRG.31308	124	147	-18.65	cACCGGAGCACccaccaaggtgta	x|||||||x||xxxxxxxxxxxxx	tTGGCCTC-TGtccaccatcaagt	--	hornerin-like, partial [Bos taurus]	-	-	-	-	-	-	-	--
novel-m0039-3p	MSTRG.4090	8970	8993	-34.28	cACCGGAGGACGGGTGGGGGTTtc	x|||||||x||:|||||x:|||xx	tTGGCCTC-TGTCCACCATCAAgt	--	PREDICTED: basic salivary proline-rich protein 1-like isoform X2 [Bos indicus]	-	-	-	-	GO:0031224//intrinsic component of membrane;GO:0044421//extracellular region part	GO:0043169//cation binding;GO:0060089//molecular transducer activity	GO:0007162//negative regulation of cell adhesion;GO:0007169//transmembrane receptor protein tyrosine kinase signaling pathway;GO:0007606//sensory perception of chemical stimulus;GO:0010596//negative regulation of endothelial cell migration;GO:0045765//regulation of angiogenesis;GO:0048869//cellular developmental process;GO:0050922//negative regulation of chemotaxis	--
novel-m0064-3p	MSTRG.15630	257	278	-26.98	cTGAGGCGCCCCTTTGTATtgg	x|||||||xx||||:||x|xxx	tACTCCGCACGGAAGCAGAcct	--	protein N-lysine methyltransferase METTL21A isoform X3 [Ovis aries]	-	-	-	-	GO:0031224//intrinsic component of membrane;GO:0044421//extracellular region part	GO:0043169//cation binding;GO:0060089//molecular transducer activity	GO:0007162//negative regulation of cell adhesion;GO:0007169//transmembrane receptor protein tyrosine kinase signaling pathway;GO:0007606//sensory perception of chemical stimulus;GO:0010596//negative regulation of endothelial cell migration;GO:0045765//regulation of angiogenesis;GO:0048869//cellular developmental process;GO:0050922//negative regulation of chemotaxis	--
novel-m0064-3p	MSTRG.18801	1380	1401	-19.95	gTGAGGCGacggaggccctccc	x|||||||xxxxxxxxxxxxxx	tACTCCGCacggaagcagacct	MKI67	PREDICTED: antigen KI-67 [Bos mutus]	-	-	-	-	GO:0005694//chromosome;GO:0043231//intracellular membrane-bounded organelle	GO:0003723//RNA binding;GO:0005515//protein binding;GO:0036094//small molecule binding	GO:0000280//nuclear division;GO:0009408//response to heat;GO:0010033//response to organic substance;GO:0031099//regeneration;GO:0044260//cellular macromolecule metabolic process;GO:0044763//single-organism cellular process;GO:1903510//mucopolysaccharide metabolic process	--
novel-m0064-3p	MSTRG.29222	226	249	-23.36	gTGAGGCGGGTGCTCAGGTCgcgc	x|||||||x|:xx||xx|||xxxx	tACTCCGCACGGAAG--CAGacct	--	serine/arginine repetitive matrix protein 1-like [Zalophus californianus]	-	-	-	-	GO:0042579//microbody	GO:0005515//protein binding;GO:0016647//oxidoreductase activity, acting on the CH-NH group of donors, oxygen as acceptor	GO:0006596//polyamine biosynthetic process;GO:0006598//polyamine catabolic process;GO:0031328//positive regulation of cellular biosynthetic process;GO:0044710//single-organism metabolic process;GO:0051234//establishment of localization	--
novel-m0053-3p	MSTRG.15958	3176	3201	-28.52	gGCCCGGAGACCCAACGTCTCGCGcc	x|||||||xx|||xxx|x||||x|xx	cCGGGCCT--GGG---CCGAGCCCca	--	-	-	-	-	-	-	-	-	--
novel-m0053-3p	MSTRG.5822	549	569	-20.11	tGCCCGGAGTCtcccagacct	x|||||||x:|xxxxxxxxxx	cCGGGCCTGGGccgagcccca	--	-	-	-	-	-	-	-	-	--
novel-m0053-3p	MSTRG.7032	1030	1050	-20.41	aGCCCGGAgggaccaccgagc	x|||||||xxxxxxxxxxxxx	cCGGGCCTgggccgagcccca	--	arf-GAP with dual PH domain-containing protein 2 isoform X1 [Cervus canadensis]	-	-	-	-	-	GO:0016647//oxidoreductase activity, acting on the CH-NH group of donors, oxygen as acceptor	GO:0006598//polyamine catabolic process;GO:0010467//gene expression;GO:0044238//primary metabolic process;GO:0044271//cellular nitrogen compound biosynthetic process;GO:1901576//organic substance biosynthetic process	--
novel-m0053-3p	MSTRG.9567	897	917	-23.6	gGCCCGGAgacacagacacga	x|||||||xxxxxxxxxxxxx	cCGGGCCTgggccgagcccca	AHNAK2	protein AHNAK2 isoform X1 [Bos indicus x Bos taurus]	Human Diseases	Infectious disease: bacterial	ko05132//Salmonella infection	K23934	GO:0012506//vesicle membrane;GO:0031674//I band;GO:0044459//plasma membrane part	-	GO:0007009//plasma membrane organization	--
novel-m0077-5p	MSTRG.15630	374	394	-14.32	cGTGGTCACTCTcatcccccg	x|||||||x||:xxxxxxxxx	aCACCAGTTAGGtcactcaga	--	protein N-lysine methyltransferase METTL21A isoform X3 [Ovis aries]	-	-	-	-	GO:0031224//intrinsic component of membrane;GO:0044421//extracellular region part	GO:0043169//cation binding;GO:0060089//molecular transducer activity	GO:0007162//negative regulation of cell adhesion;GO:0007169//transmembrane receptor protein tyrosine kinase signaling pathway;GO:0007606//sensory perception of chemical stimulus;GO:0010596//negative regulation of endothelial cell migration;GO:0045765//regulation of angiogenesis;GO:0048869//cellular developmental process;GO:0050922//negative regulation of chemotaxis	--
novel-m0077-5p	MSTRG.22496	455	475	-26.69	tGTGGTCAATTCAGGGTGTtt	x|||||||||:|||x|x||xx	aCACCAGTTAGGTCACTCAga	--	endonuclease-reverse transcriptase [Babesia ovata]	-	-	-	-	GO:0031252//cell leading edge;GO:0070161//anchoring junction	GO:0003779//actin binding;GO:0050839//cell adhesion molecule binding	GO:0010468//regulation of gene expression;GO:0098602//single organism cell adhesion	--
novel-m0077-5p	MSTRG.4090	14203	14224	-20.2	tGTGGTCAAGTCCAcgaattta	x||||||||x||||xxxxxxxx	aCACCAGTT-AGGTcactcaga	--	PREDICTED: basic salivary proline-rich protein 1-like isoform X2 [Bos indicus]	-	-	-	-	GO:0031224//intrinsic component of membrane;GO:0044421//extracellular region part	GO:0043169//cation binding;GO:0060089//molecular transducer activity	GO:0007162//negative regulation of cell adhesion;GO:0007169//transmembrane receptor protein tyrosine kinase signaling pathway;GO:0007606//sensory perception of chemical stimulus;GO:0010596//negative regulation of endothelial cell migration;GO:0045765//regulation of angiogenesis;GO:0048869//cellular developmental process;GO:0050922//negative regulation of chemotaxis	--
novel-m0077-5p	MSTRG.9421	185	205	-20.17	tGTGGTCACTaagaaggggtc	x|||||||x|xxxxxxxxxxx	aCACCAGTTAggtcactcaga	--	thymocyte nuclear protein 1 isoform X2 [Odocoileus virginianus texanus]	-	-	-	-	-	-	-	--
novel-m0110-3p	MSTRG.25549	337	354	-15.75	gAAGTTAGGT-CTGTCGgt	x||||||||xx|:||x|xx	gTTCAATCCCCGGCACCtc	STAT2	signal transducer and activator of transcription 2 isoform 1 [Camelus ferus]	Human Diseases;Human Diseases;Human Diseases;Human Diseases;Human Diseases;Organismal Systems;Environmental Information Processing;Human Diseases;Organismal Systems;Human Diseases;Cellular Processes;Human Diseases;Human Diseases;Organismal Systems;Organismal Systems	Infectious disease: viral;Cancer: overview;Infectious disease: viral;Infectious disease: viral;Infectious disease: viral;Immune system;Signal transduction;Infectious disease: viral;Immune system;Infectious disease: viral;Cell growth and death;Infectious disease: viral;Infectious disease: viral;Development and regeneration;Immune system	ko05168//Herpes simplex virus 1 infection;ko05200//Pathways in cancer;ko05165//Human papillomavirus infection;ko05169//Epstein-Barr virus infection;ko05162//Measles;ko04062//Chemokine signaling pathway;ko04630//JAK-STAT signaling pathway;ko05167//Kaposi sarcoma-associated herpesvirus infection;ko04621//NOD-like receptor signaling pathway;ko05164//Influenza A;ko04217//Necroptosis;ko05161//Hepatiti…	K11221;K11221;K11221;K11221;K11221;K11221;K11221;K11221;K11221;K11221;K11221;K11221;K11221;K11221;K11221	GO:0016020//membrane;GO:0031981//nuclear lumen;GO:0044444//cytoplasmic part	GO:0001071//nucleic acid binding transcription factor activity;GO:0003677//DNA binding;GO:0005515//protein binding;GO:0060089//molecular transducer activity	GO:0001959//regulation of cytokine-mediated signaling pathway;GO:0002252//immune effector process;GO:0006355//regulation of transcription, DNA-templated;GO:0006366//transcription from RNA polymerase II promoter;GO:0009617//response to bacterium;GO:0010506//regulation of autophagy;GO:0035556//intracellular signal transduction;GO:0044403//symbiosis, encompassing mutualism through parasitism;GO:0044…	--
novel-m0110-3p	MSTRG.4578	383	404	-15.62	gAAGTTAGAAAAGGTCGTAGtt	x|||||||xxxx||:|||x|xx	gTTCAATCC---CCGGCACCtc	--	reverse transcriptase-like [Bos taurus]	-	-	-	-	GO:0043231//intracellular membrane-bounded organelle	GO:0003723//RNA binding	GO:0006464//cellular protein modification process;GO:0015980//energy derivation by oxidation of organic compounds	--
novel-m0110-3p	MSTRG.6869	1762	1780	-13.61	cAAGTTAGGactaagacga	x||||||||xxxxxxxxxx	gTTCAATCCccggcacctc	ABCC4	multidrug resistance-associated protein 4-like isoform X1 [Bos indicus x Bos taurus]	Environmental Information Processing;Organismal Systems;Environmental Information Processing;Human Diseases	Signal transduction;Digestive system;Membrane transport;Drug resistance: antineoplastic	ko04024//cAMP signaling pathway;ko04976//Bile secretion;ko02010//ABC transporters;ko01523//Antifolate resistance	K05673;K05673;K05673;K05673	GO:0030667//secretory granule membrane;GO:0031224//intrinsic component of membrane	GO:0015405//P-P-bond-hydrolysis-driven transmembrane transporter activity;GO:0016616//oxidoreductase activity, acting on the CH-OH group of donors, NAD or NADP as acceptor;GO:0016887//ATPase activity;GO:0032550//purine ribonucleoside binding	GO:0001775//cell activation;GO:0006811//ion transport;GO:0007599//hemostasis;GO:0008284//positive regulation of cell proliferation;GO:0009719//response to endogenous stimulus;GO:0010033//response to organic substance;GO:0015893//drug transport;GO:0044710//single-organism metabolic process	--
novel-m0110-3p	MSTRG.9421	159	177	-18.09	gAAGTTAGGACCCGcagga	x||||||||xx|||xxxxx	gTTCAATCCCCGGCacctc	--	thymocyte nuclear protein 1 isoform X2 [Odocoileus virginianus texanus]	-	-	-	-	-	-	-	--
novel-m0143-3p	MSTRG.18801	157	178	-22.55	tGTGGTCCCCTTAGCTAGGTgg	x|||||||xxx:xx|x|||:xx	cCACCAGGCCTGCAGCTCCGcc	MKI67	PREDICTED: antigen KI-67 [Bos mutus]	-	-	-	-	GO:0005694//chromosome;GO:0043231//intracellular membrane-bounded organelle	GO:0003723//RNA binding;GO:0005515//protein binding;GO:0036094//small molecule binding	GO:0000280//nuclear division;GO:0009408//response to heat;GO:0010033//response to organic substance;GO:0031099//regeneration;GO:0044260//cellular macromolecule metabolic process;GO:0044763//single-organism cellular process;GO:1903510//mucopolysaccharide metabolic process	--
novel-m0143-3p	MSTRG.1997	562	581	-18.19	tGTGGTCCAG-CGT-GAccatg	x|||||||x|x|||x||xxxxx	cCACCAGGCCTGCAGCTccgcc	DACT2	dapper homolog 2 [Bos indicus x Bos taurus]	-	-	-	-	GO:0043231//intracellular membrane-bounded organelle	GO:0019901//protein kinase binding	GO:0000904//cell morphogenesis involved in differentiation;GO:0007155//cell adhesion;GO:0030097//hemopoiesis;GO:0032926//negative regulation of activin receptor signaling pathway;GO:0072044//collecting duct development	--
novel-m0143-3p	MSTRG.21307	434	456	-27.97	gGTGGTCCGGCGTGTCtgtctcc	x|||||||||x::|||xxxxxxx	cCACCAGGCC-TGCAGctccgcc	MRGPRF	mas-related G-protein coupled receptor member F isoform X1 [Neogale vison]	-	-	-	-	GO:0031224//intrinsic component of membrane;GO:0031988//membrane-bounded vesicle	GO:0004888//transmembrane signaling receptor activity	GO:0007166//cell surface receptor signaling pathway	--
novel-m0143-3p	MSTRG.25549	126	148	-30.58	cGTGGTCCCGGAGGTCTCTGCgg	x|||||||x|||x|||xxx||xx	cCACCAGG-CCTGCAGCTCCGcc	STAT2	signal transducer and activator of transcription 2 isoform 1 [Camelus ferus]	Human Diseases;Human Diseases;Human Diseases;Human Diseases;Human Diseases;Organismal Systems;Environmental Information Processing;Human Diseases;Organismal Systems;Human Diseases;Cellular Processes;Human Diseases;Human Diseases;Organismal Systems;Organismal Systems	Infectious disease: viral;Cancer: overview;Infectious disease: viral;Infectious disease: viral;Infectious disease: viral;Immune system;Signal transduction;Infectious disease: viral;Immune system;Infectious disease: viral;Cell growth and death;Infectious disease: viral;Infectious disease: viral;Development and regeneration;Immune system	ko05168//Herpes simplex virus 1 infection;ko05200//Pathways in cancer;ko05165//Human papillomavirus infection;ko05169//Epstein-Barr virus infection;ko05162//Measles;ko04062//Chemokine signaling pathway;ko04630//JAK-STAT signaling pathway;ko05167//Kaposi sarcoma-associated herpesvirus infection;ko04621//NOD-like receptor signaling pathway;ko05164//Influenza A;ko04217//Necroptosis;ko05161//Hepatiti…	K11221;K11221;K11221;K11221;K11221;K11221;K11221;K11221;K11221;K11221;K11221;K11221;K11221;K11221;K11221	GO:0016020//membrane;GO:0031981//nuclear lumen;GO:0044444//cytoplasmic part	GO:0001071//nucleic acid binding transcription factor activity;GO:0003677//DNA binding;GO:0005515//protein binding;GO:0060089//molecular transducer activity	GO:0001959//regulation of cytokine-mediated signaling pathway;GO:0002252//immune effector process;GO:0006355//regulation of transcription, DNA-templated;GO:0006366//transcription from RNA polymerase II promoter;GO:0009617//response to bacterium;GO:0010506//regulation of autophagy;GO:0035556//intracellular signal transduction;GO:0044403//symbiosis, encompassing mutualism through parasitism;GO:0044…	--
novel-m0143-3p	MSTRG.29222	4999	5021	-31.62	gGTGGTCCGACCTGTGGGGGTcg	x||||||||xx|x||x|:||:xx	cCACCAGGCCTG-CAGCTCCGcc	--	serine/arginine repetitive matrix protein 1-like [Zalophus californianus]	-	-	-	-	GO:0042579//microbody	GO:0005515//protein binding;GO:0016647//oxidoreductase activity, acting on the CH-NH group of donors, oxygen as acceptor	GO:0006596//polyamine biosynthetic process;GO:0006598//polyamine catabolic process;GO:0031328//positive regulation of cellular biosynthetic process;GO:0044710//single-organism metabolic process;GO:0051234//establishment of localization	--
novel-m0143-3p	MSTRG.29423	1064	1087	-30.13	gGTGGTCCACGGTCGTCcttcggc	x|||||||xx||x||||xxxxxxx	cCACCAGG--CCTGCAGctccgcc	FBN3	fibrillin-3 [Bos taurus]	-	-	-	-	-	-	GO:0007507//heart development;GO:0009887//organ morphogenesis;GO:0009987//cellular process	--
novel-m0143-3p	MSTRG.31464	227	248	-31.31	gGTGGTCCGAAGGGGCAGGgac	x||||||||x|x|xxx|||xxx	cCACCAGGCCTGCAGCTCCgcc	--	protein N-lysine methyltransferase METTL21A isoform X3 [Ovis aries]	Organismal Systems	Sensory system	ko04742//Taste transduction	K08474	GO:0005576//extracellular region;GO:0031224//intrinsic component of membrane;GO:0044424//intracellular part	GO:0005488//binding;GO:0060089//molecular transducer activity	GO:0001525//angiogenesis;GO:0007166//cell surface receptor signaling pathway;GO:0007606//sensory perception of chemical stimulus;GO:0040013//negative regulation of locomotion;GO:0048523//negative regulation of cellular process;GO:0051241//negative regulation of multicellular organismal process	--
novel-m0143-3p	MSTRG.31466	1713	1736	-35.81	gGTGGTCCTGGTGCGTCCTGGTga	x|||||||x||x:||||xx||:xx	cCACCAGG-CC-TGCAGCTCCGcc	LONRF2	LOW QUALITY PROTEIN: LON peptidase N-terminal domain and RING finger protein 2 [Bos taurus]	-	-	-	-	-	GO:0046914//transition metal ion binding	GO:0019538//protein metabolic process	--
novel-m0143-3p	MSTRG.33557	1146	1167	-21.46	tGTGGTCCTTTCGGGGAGTCtc	x|||||||xxx||xx|||x|xx	cCACCAGGCCTGCAGCTCCGcc	ARHGAP6	rho GTPase-activating protein 6 isoform X2 [Bos indicus x Bos taurus]	-	-	-	-	GO:0015629//actin cytoskeleton;GO:0044444//cytoplasmic part	GO:0019899//enzyme binding;GO:0019904//protein domain specific binding;GO:0030674//protein binding, bridging;GO:0060229//lipase activator activity	GO:0001953//negative regulation of cell-matrix adhesion;GO:0007045//cell-substrate adherens junction assembly;GO:0008154//actin polymerization or depolymerization;GO:0010863//positive regulation of phospholipase C activity;GO:0032232//negative regulation of actin filament bundle assembly;GO:0043087//regulation of GTPase activity	--
novel-m0143-3p	MSTRG.3691	656	677	-27.74	gGTGGTCCcataggaaaggggt	x|||||||xxxxxxxxxxxxxx	cCACCAGGcctgcagctccgcc	MRC1	PREDICTED: macrophage mannose receptor 1 [Bos mutus]	Human Diseases;Cellular Processes	Infectious disease: bacterial;Transport and catabolism	ko05152//Tuberculosis;ko04145//Phagosome	K06560;K06560	GO:0016021//integral component of membrane;GO:0031090//organelle membrane;GO:0044464//cell part	GO:0038023//signaling receptor activity;GO:0048029//monosaccharide binding	GO:0006897//endocytosis;GO:0032496//response to lipopolysaccharide;GO:0034341//response to interferon-gamma;GO:0050794//regulation of cellular process;GO:0070670//response to interleukin-4	--
novel-m0143-3p	MSTRG.4090	1960	1983	-17.81	tGTGGTCCCGGTCTTCCGAcaccc	x|||||||x||x|x||x||xxxxx	cCACCAGG-CCTGCAG-CTccgcc	--	PREDICTED: basic salivary proline-rich protein 1-like isoform X2 [Bos indicus]	-	-	-	-	GO:0031224//intrinsic component of membrane;GO:0044421//extracellular region part	GO:0043169//cation binding;GO:0060089//molecular transducer activity	GO:0007162//negative regulation of cell adhesion;GO:0007169//transmembrane receptor protein tyrosine kinase signaling pathway;GO:0007606//sensory perception of chemical stimulus;GO:0010596//negative regulation of endothelial cell migration;GO:0045765//regulation of angiogenesis;GO:0048869//cellular developmental process;GO:0050922//negative regulation of chemotaxis	--
novel-m0143-3p	MSTRG.4101	57	78	-24.76	gGTGGTCCTCAGGACACGGacg	x|||||||xx|x|x|xx||xxx	cCACCAGGCCTGCAGCTCCgcc	--	-	-	-	-	-	-	-	-	--
novel-m0143-3p	MSTRG.4578	1716	1737	-14.67	tGTGGTCCaccggtttcataac	x|||||||xxxxxxxxxxxxxx	cCACCAGGcctgcagctccgcc	--	reverse transcriptase-like [Bos taurus]	-	-	-	-	GO:0043231//intracellular membrane-bounded organelle	GO:0003723//RNA binding	GO:0006464//cellular protein modification process;GO:0015980//energy derivation by oxidation of organic compounds	--
novel-m0143-3p	MSTRG.6886	942	962	-18.02	tGTGGTCCG-AGGTTCAacatg	x||||||||x|x||:x|xxxxx	cCACCAGGCCTGCAGCTccgcc	ABCC4	TPA: ATP-binding cassette protein C4-like [Bos taurus]	Environmental Information Processing;Organismal Systems;Environmental Information Processing;Human Diseases	Signal transduction;Digestive system;Membrane transport;Drug resistance: antineoplastic	ko04024//cAMP signaling pathway;ko04976//Bile secretion;ko02010//ABC transporters;ko01523//Antifolate resistance	K05673;K05673;K05673;K05673	GO:0030667//secretory granule membrane;GO:0031224//intrinsic component of membrane	GO:0005253//anion channel activity;GO:0016616//oxidoreductase activity, acting on the CH-OH group of donors, NAD or NADP as acceptor;GO:0032550//purine ribonucleoside binding;GO:0042626//ATPase activity, coupled to transmembrane movement of substances	GO:0001775//cell activation;GO:0006821//chloride transport;GO:0007599//hemostasis;GO:0008284//positive regulation of cell proliferation;GO:0009719//response to endogenous stimulus;GO:0010033//response to organic substance;GO:0044710//single-organism metabolic process	--
novel-m0128-5p	MSTRG.14602	1260	1282	-15.8	cCGGGAAGAACGTAAagactaaa	x||||||||x|:|x|xxxxxxxx	tGCCCTTCT-GTACTcgcgcccg	ZNF671	zinc finger protein 28 homolog [Zalophus californianus]	Human Diseases	Infectious disease: viral	ko05168//Herpes simplex virus 1 infection	K09228	-	-	-	--
novel-m0128-5p	MSTRG.1998	198	219	-22.25	gCGGGAAGGCccccacgtccgg	x|||||||:|xxxxxxxxxxxx	tGCCCTTCTGtactcgcgcccg	DACT2	dapper homolog 2 [Bos indicus x Bos taurus]	-	-	-	-	GO:0043231//intracellular membrane-bounded organelle	GO:0019901//protein kinase binding	GO:0000904//cell morphogenesis involved in differentiation;GO:0007155//cell adhesion;GO:0032926//negative regulation of activin receptor signaling pathway;GO:0072044//collecting duct development	--
novel-m0128-5p	MSTRG.29222	5118	5140	-23.07	tCGGGAAGACGTTCACGACGacg	x|||||||||:|xxx||x||xxx	tGCCCTTCTGTACTCGC-GCccg	--	serine/arginine repetitive matrix protein 1-like [Zalophus californianus]	-	-	-	-	GO:0042579//microbody	GO:0005515//protein binding;GO:0016647//oxidoreductase activity, acting on the CH-NH group of donors, oxygen as acceptor	GO:0006596//polyamine biosynthetic process;GO:0006598//polyamine catabolic process;GO:0031328//positive regulation of cellular biosynthetic process;GO:0044710//single-organism metabolic process;GO:0051234//establishment of localization	--
novel-m0128-5p	MSTRG.4090	17974	17993	-19.83	aCGGGAAG---TGACCGACGaac	x|||||||xxx|||x||x||xxx	tGCCCTTCTGTACTCGC-GCccg	--	PREDICTED: basic salivary proline-rich protein 1-like isoform X2 [Bos indicus]	-	-	-	-	GO:0031224//intrinsic component of membrane;GO:0044421//extracellular region part	GO:0043169//cation binding;GO:0060089//molecular transducer activity	GO:0007162//negative regulation of cell adhesion;GO:0007169//transmembrane receptor protein tyrosine kinase signaling pathway;GO:0007606//sensory perception of chemical stimulus;GO:0010596//negative regulation of endothelial cell migration;GO:0045765//regulation of angiogenesis;GO:0048869//cellular developmental process;GO:0050922//negative regulation of chemotaxis	--
novel-m0128-5p	MSTRG.9831	94	116	-24.48	aCGGGAAGACCTACTCGACGagg	x|||||||||x|xxx||x||xxx	tGCCCTTCTGTACTCGC-GCccg	Arc	PREDICTED: LOW QUALITY PROTEIN: activity-regulated cytoskeleton-associated protein [Bos mutus]	Human Diseases	Substance dependence	ko05031//Amphetamine addiction	K15867	GO:0005856//cytoskeleton;GO:0030141//secretory granule;GO:0044309//neuron spine;GO:0097060//synaptic membrane	GO:0005488//binding	GO:0003002//regionalization;GO:0006996//organelle organization;GO:0007611//learning or memory;GO:0009888//tissue development;GO:0016192//vesicle-mediated transport;GO:0022603//regulation of anatomical structure morphogenesis;GO:0032414//positive regulation of ion transmembrane transporter activity;GO:0048167//regulation of synaptic plasticity;GO:0048870//cell motility	--
novel-m0098-3p	MSTRG.10777	1590	1611	-28.38	tGTCGAGTCTTGGAACGAGgta	x||||||||:||xxx||x|xxx	aCAGCTCAGGACAAAGCCCgga	--	GRAM domain-containing protein 2B isoform X2 [Bos taurus]	Cellular Processes	Transport and catabolism	ko04146//Peroxisome	K00308	GO:0005737//cytoplasm;GO:0043231//intracellular membrane-bounded organelle	GO:0005515//protein binding;GO:0016647//oxidoreductase activity, acting on the CH-NH group of donors, oxygen as acceptor	GO:0006596//polyamine biosynthetic process;GO:0006598//polyamine catabolic process;GO:0009653//anatomical structure morphogenesis;GO:0016043//cellular component organization;GO:0031325//positive regulation of cellular metabolic process;GO:0031326//regulation of cellular biosynthetic process;GO:0044763//single-organism cellular process;GO:0048523//negative regulation of cellular process;GO:0048731…	--
novel-m0098-3p	MSTRG.17500	588	609	-17.51	tGTCGAGTCTgagaaagactaa	x||||||||:xxxxxxxxxxxx	aCAGCTCAGGacaaagcccgga	C4B	complement C4 isoform X1 [Bos taurus]	Human Diseases;Human Diseases;Organismal Systems;Human Diseases	Immune disease;Infectious disease: bacterial;Immune system;Infectious disease: bacterial	ko05322//Systemic lupus erythematosus;ko05150//Staphylococcus aureus infection;ko04610//Complement and coagulation cascades;ko05133//Pertussis	K03989;K03989;K03989;K03989	GO:0016020//membrane;GO:0031988//membrane-bounded vesicle;GO:0044217//other organism part	GO:0001846//opsonin binding;GO:0061135//endopeptidase regulator activity	GO:0002237//response to molecule of bacterial origin;GO:0002673//regulation of acute inflammatory response;GO:0006956//complement activation;GO:0010466//negative regulation of peptidase activity;GO:0019724//B cell mediated immunity;GO:0043277//apoptotic cell clearance	--
novel-m0098-3p	MSTRG.21507	2270	2291	-15.58	cGTCGAGTACGGacgtccgatt	x|||||||x|x|xxxxxxxxxx	aCAGCTCAGGACaaagcccgga	Slc29a2	equilibrative nucleoside transporter 2 isoform X2 [Bos taurus]	Human Diseases	Substance dependence	ko05034//Alcoholism	K15014	GO:0016021//integral component of membrane;GO:0031090//organelle membrane;GO:0043231//intracellular membrane-bounded organelle;GO:0043232//intracellular non-membrane-bounded organelle	GO:0015932//nucleobase-containing compound transmembrane transporter activity	GO:0006725//cellular aromatic compound metabolic process;GO:0006863//purine nucleobase transport;GO:0007589//body fluid secretion;GO:0015855//pyrimidine nucleobase transport;GO:0015864//pyrimidine nucleoside transport;GO:0032868//response to insulin;GO:0044763//single-organism cellular process	--
novel-m0098-3p	MSTRG.3598	313	334	-13.25	cGTCGAGTACaccccacttgca	x|||||||x|xxxxxxxxxxxx	aCAGCTCAGGacaaagcccgga	OPTN	PREDICTED: optineurin isoform X2 [Bos mutus]	Cellular Processes	Transport and catabolism	ko04137//Mitophagy - animal	K19946	-	-	-	--
novel-m0098-3p	MSTRG.3753	1454	1475	-13.76	cGTCGAGTTTTtacaattctga	x|||||||::|xxxxxxxxxxx	aCAGCTCAGGAcaaagcccgga	WAC	WW domain-containing adapter protein with coiled-coil isoform X2 [Bos taurus]	-	-	-	-	GO:0016604//nuclear body;GO:0030529//intracellular ribonucleoprotein complex	GO:0001099//basal RNA polymerase II transcription machinery binding	GO:0000077//DNA damage checkpoint;GO:0006355//regulation of transcription, DNA-templated;GO:0006513//protein monoubiquitination;GO:0010508//positive regulation of autophagy;GO:0031330//negative regulation of cellular catabolic process;GO:0033523//histone H2B ubiquitination	--
novel-m0098-3p	MSTRG.5822	1016	1037	-11.43	gGTCGAGTggaagttactactc	x|||||||xxxxxxxxxxxxxx	aCAGCTCAggacaaagcccgga	--	-	-	-	-	-	-	-	-	--
novel-m0098-3p	MSTRG.9567	1038	1059	-17.91	cGTCGAGTCgacccggacgagg	x||||||||xxxxxxxxxxxxx	aCAGCTCAGgacaaagcccgga	AHNAK2	protein AHNAK2 isoform X1 [Bos indicus x Bos taurus]	Human Diseases	Infectious disease: bacterial	ko05132//Salmonella infection	K23934	GO:0012506//vesicle membrane;GO:0031674//I band;GO:0044459//plasma membrane part	-	GO:0007009//plasma membrane organization	--
novel-m0099-5p	MSTRG.10777	1590	1611	-28.38	tGTCGAGTCTTGGAACGAGgta	x||||||||:||xxx||x|xxx	aCAGCTCAGGACAAAGCCCgga	--	GRAM domain-containing protein 2B isoform X2 [Bos taurus]	Cellular Processes	Transport and catabolism	ko04146//Peroxisome	K00308	GO:0005737//cytoplasm;GO:0043231//intracellular membrane-bounded organelle	GO:0005515//protein binding;GO:0016647//oxidoreductase activity, acting on the CH-NH group of donors, oxygen as acceptor	GO:0006596//polyamine biosynthetic process;GO:0006598//polyamine catabolic process;GO:0009653//anatomical structure morphogenesis;GO:0016043//cellular component organization;GO:0031325//positive regulation of cellular metabolic process;GO:0031326//regulation of cellular biosynthetic process;GO:0044763//single-organism cellular process;GO:0048523//negative regulation of cellular process;GO:0048731…	--
novel-m0099-5p	MSTRG.17500	588	609	-17.51	tGTCGAGTCTgagaaagactaa	x||||||||:xxxxxxxxxxxx	aCAGCTCAGGacaaagcccgga	C4B	complement C4 isoform X1 [Bos taurus]	Human Diseases;Human Diseases;Organismal Systems;Human Diseases	Immune disease;Infectious disease: bacterial;Immune system;Infectious disease: bacterial	ko05322//Systemic lupus erythematosus;ko05150//Staphylococcus aureus infection;ko04610//Complement and coagulation cascades;ko05133//Pertussis	K03989;K03989;K03989;K03989	GO:0016020//membrane;GO:0031988//membrane-bounded vesicle;GO:0044217//other organism part	GO:0001846//opsonin binding;GO:0061135//endopeptidase regulator activity	GO:0002237//response to molecule of bacterial origin;GO:0002673//regulation of acute inflammatory response;GO:0006956//complement activation;GO:0010466//negative regulation of peptidase activity;GO:0019724//B cell mediated immunity;GO:0043277//apoptotic cell clearance	--
novel-m0099-5p	MSTRG.21507	2270	2291	-15.58	cGTCGAGTACGGacgtccgatt	x|||||||x|x|xxxxxxxxxx	aCAGCTCAGGACaaagcccgga	Slc29a2	equilibrative nucleoside transporter 2 isoform X2 [Bos taurus]	Human Diseases	Substance dependence	ko05034//Alcoholism	K15014	GO:0016021//integral component of membrane;GO:0031090//organelle membrane;GO:0043231//intracellular membrane-bounded organelle;GO:0043232//intracellular non-membrane-bounded organelle	GO:0015932//nucleobase-containing compound transmembrane transporter activity	GO:0006725//cellular aromatic compound metabolic process;GO:0006863//purine nucleobase transport;GO:0007589//body fluid secretion;GO:0015855//pyrimidine nucleobase transport;GO:0015864//pyrimidine nucleoside transport;GO:0032868//response to insulin;GO:0044763//single-organism cellular process	--
novel-m0099-5p	MSTRG.3598	313	334	-13.25	cGTCGAGTACaccccacttgca	x|||||||x|xxxxxxxxxxxx	aCAGCTCAGGacaaagcccgga	OPTN	PREDICTED: optineurin isoform X2 [Bos mutus]	Cellular Processes	Transport and catabolism	ko04137//Mitophagy - animal	K19946	-	-	-	--
novel-m0099-5p	MSTRG.3753	1454	1475	-13.76	cGTCGAGTTTTtacaattctga	x|||||||::|xxxxxxxxxxx	aCAGCTCAGGAcaaagcccgga	WAC	WW domain-containing adapter protein with coiled-coil isoform X2 [Bos taurus]	-	-	-	-	GO:0016604//nuclear body;GO:0030529//intracellular ribonucleoprotein complex	GO:0001099//basal RNA polymerase II transcription machinery binding	GO:0000077//DNA damage checkpoint;GO:0006355//regulation of transcription, DNA-templated;GO:0006513//protein monoubiquitination;GO:0010508//positive regulation of autophagy;GO:0031330//negative regulation of cellular catabolic process;GO:0033523//histone H2B ubiquitination	--
novel-m0099-5p	MSTRG.5822	1016	1037	-11.43	gGTCGAGTggaagttactactc	x|||||||xxxxxxxxxxxxxx	aCAGCTCAggacaaagcccgga	--	-	-	-	-	-	-	-	-	--
[truncated: 5,106 more rows]
